# Supplementary material for: PRC1 sustains the integrity of neural fate in the absence of PRC2 function
Source: eLife. 2022 Jan 7;11:e72769. doi: 10.7554/eLife.72769 (PMC8765755; doi:10.7554/eLife.72769)
Supplement: Figure 1—figure supplement 1—source data 1. [file elife-72769-fig1-figsupp1-data1.xlsx]

## Sheet: Sheet1
Figure 1-fig sup 1A		Control	Ezh MNΔ		Column B	Ezh MNΔ
	emb1	39181	10366		vs.	vs.
		50561	11959		Column A	Control
		47381	7572
		65221	17474		Unpaired t test
		53745	8615		P value	<0.0001
		45608	5435		P value summary	****
		38444	8498		Significantly different (P < 0.05)?	Yes
		33604	5030		One- or two-tailed P value?	Two-tailed
		61412	11200		t, df	t=21.25, df=78
		48643	10749
		51879	6411		How big is the difference?
		56210	10778		Mean of column A	53476
		50914	12355		Mean of column B	11762
		40666	6422		Difference between means (B - A) ± SEM	-41714 ± 1963
		51497	2983		95% confidence interval	-45622 to -37805
		48156	3770		R squared (eta squared)	0.8527
		61194	8417
		47001	5324
		73331	12001
		53521	2753
	emb2	71881	15629
		78377	15203
		60210	10293
		53194	19948
		71427	16897
		57846	12884
		55401	22114
		67247	13490
		28854	12736
		41939	8639
		44233	10289
		62351	23735
		47720	12949
		43887	14405
		59713	11773
		51095	23187
		52829	19660
		42741	9424
		64056	9573
		65851	19526
