# Supplementary material for: PRC1 sustains the integrity of neural fate in the absence of PRC2 function
Source: eLife. 2022 Jan 7;11:e72769. doi: 10.7554/eLife.72769 (PMC8765755; doi:10.7554/eLife.72769)
Supplement: Figure 1—source data 1. [file elife-72769-fig1-data1.xlsx]

## Sheet: Sheet1
		Control						KO
Figure 1G		C1	C1	C1	C2	C2	C2	mt1	mt1	mt1	mt2	mt2	mt2
Ezh BR	MN#:	53	54	60	55	56	45	58	62	55	62	64	58
Mnx1 counts
Unpaired t test
P value	0.0342
P value summary	*
Significantly different (P < 0.05)?	Yes
One- or two-tailed P value?	Two-tailed
t, df	t=2.452, df=10
How big is the difference?
Mean of column A	53.83
Mean of column B	59.83
Difference between means (B - A) ± SEM	6.000 ± 2.447
95% confidence interval	0.5473 to 11.45
R squared (eta squared)	0.3754
		Control						KO
Figure 1N		C1	C1	C1	C2	C2	C2	mt1	mt1	mt1	mt2	mt2	mt2
Ring1 BR	MN#	70	86	64	75	76	69	66	60	68	65	71	77
Mnx1 counts
Unpaired t test
P value	0.1879
P value summary	ns
Significantly different (P < 0.05)?	No
One- or two-tailed P value?	Two-tailed
t, df	t=1.414, df=10
How big is the difference?
Mean of column A	73.33
Mean of column B	67.83
Difference between means (B - A) ± SEM	-5.500 ± 3.891
95% confidence interval	-14.17 to 3.169
R squared (eta squared)	0.1665
