# Supplementary material for: PRC1 sustains the integrity of neural fate in the absence of PRC2 function
Source: eLife. 2022 Jan 7;11:e72769. doi: 10.7554/eLife.72769 (PMC8765755; doi:10.7554/eLife.72769)
Supplement: Figure 2—figure supplement 1—source data 1. [file elife-72769-fig2-figsupp1-data1.xlsx]

## Sheet: Sheet1
Figure 2 - fig sup 1G
axon length
	Control	Ring ΔMN		Column B	Ring ΔMN
	839.79	647.54		vs.	vs.
	918	673.36		Column A	Control
	869.4	687.2
	843.39	667.31		Unpaired t test
	785.67	692.54		P value	<0.0001
	941.69	693.73		P value summary	****
	922.45	754.4		Significantly different (P < 0.05)?	Yes
	916.5	771.93		One- or two-tailed P value?	Two-tailed
	881.22	764.04		t, df	t=8.135, df=18
	842.79	723.99
				How big is the difference?
				Mean of column A	876.1
				Mean of column B	707.6
				Difference between means (B - A) ± SEM	-168.5 ± 20.71
				95% confidence interval	-212.0 to -125.0
				R squared (eta squared)	0.7862
axon width
	Control	Ring ΔMN
	34.2	46.82		Column B	Ring ΔMN
	31.95	53.47		vs.	vs.
	28.97	48.02		Column A	Control
	28.98	58.07
	31.04	54.46		Unpaired t test
	26.53	44.92		P value	<0.0001
	35.13	43.94		P value summary	****
	31.76	46.54		Significantly different (P < 0.05)?	Yes
	27.48	50.49		One- or two-tailed P value?	Two-tailed
	28.3	58.5		t, df	t=10.51, df=18
				How big is the difference?
				Mean of column A	30.43
				Mean of column B	50.52
				Difference between means (B - A) ± SEM	20.09 ± 1.911
				95% confidence interval	16.07 to 24.10
				R squared (eta squared)	0.8599
