# Supplementary material for: PRC1 sustains the integrity of neural fate in the absence of PRC2 function
Source: eLife. 2022 Jan 7;11:e72769. doi: 10.7554/eLife.72769 (PMC8765755; doi:10.7554/eLife.72769)
Supplement: Figure 2—source data 1. [file elife-72769-fig2-data1.xlsx]

## Sheet: Sheet1
Figure 2G	Foxp1 in Ring1 cKO
		Control			Ring1 cKO
	Foxp1+ Br	80.5	75.75	72.75	6.75	4	3.5
	FoxP1+ Th	8.5	7.75	5.8	0.5	1.25	1
		Control			Ring1 cKO
		Mean	SEM	n	Mean	SEM	n	P vaule
	Br	76.3333	2.25616	3	4.75	1.01036	3	8e-06
	Th	7.35	0.804674	3	0.916667	0.220479	3	0.001523
Figure 2H	MMC HMC in Ring1 cKO
	Brachial	Control			Ring1 cKO
	MMC	42.25	38.75	42.25	32	35	33.5
	HMC	4	9.75	7.25	12.75	13.5	13.75
	Progenitor	3.5	1.5	3.75	10.25	8.5	8
		Control			Ring1 cKO
		Mean	SEM	n	Mean	SEM	n	P value
	MMC	41.0833	1.16667	3	33.5	0.866025	3	0.006431
	HMC	7	1.66458	3	13.3333	0.300463	3	0.020047
	Progenitor	2.91667	0.712	3	8.91667	0.682113	3	0.003687
	Thoracic	Control			Ring1 cKO
	MMC	26.5	20.25	27.25	28.75	26.25	27
	HMC	25.75	22.5	21.5	29.25	31.5	27.75
	Progenitor	3	3.5	1.75	10.75	13.5	9.5
		Control			Ring1 cKO
		Mean	SEM	n	Mean	SEM	n	P value
	MMC	24.6667	2.21892	3	27.3333	0.740683	3	0.317931
	HMC	23.25	1.2829	3	29.5	1.08972	3	0.020599
	Progenitor	2.75	0.520416	3	11.25	1.18145	3	0.002755
