# Supplementary material for: PRC1 sustains the integrity of neural fate in the absence of PRC2 function
Source: eLife. 2022 Jan 7;11:e72769. doi: 10.7554/eLife.72769 (PMC8765755; doi:10.7554/eLife.72769)
Supplement: Figure 7—source data 1. [file elife-72769-fig7-data1.xlsx]

## Sheet: Sheet1
Figure 7
%of neurons expressing GFP markers and indicated protein
Hoxa13 misexpression
	Hoxc4	Hoxa5	Hoxc6	Hoxc8	Hoxc9	Hoxc10	Mnx1 Isl1
	0.1	0.148	0.018	0.103	0.117	0.127	0.796
	0.159	0.175	0.005	0.078	0.073	0.169	0.8
	0.095	0.253	0	0.101	0.091	0.192	0.813
	0.152	0.149	0.007	0.107	0.0017	0.081	0.85
Hoxb13 misexpression
	Hoxc4	Hoxa5	Hoxc6	Hoxc8	Hoxc9	Hoxc10	Mnx1 Isl1
	0.068609	0.08396	0.023016	0.029891	0.037156	0.074866	0.436249
	0.170184	0.091765	0.019231	0.042424	0	0.108333	0.844534
	0	0.172276	0.02479	0.061448	0.047974	0.160985	0.982143
	0.093561	0.193734	0.027864		0.012821	0.153249	0.773823
					0.033239		0.895638
							0.774805
							0.832843
							0.829258
							0.607488
							0.636364
							0.834091
