# Supplementary material for: PRC1 sustains the integrity of neural fate in the absence of PRC2 function
Source: eLife. 2022 Jan 7;11:e72769. doi: 10.7554/eLife.72769 (PMC8765755; doi:10.7554/eLife.72769)
Supplement: Supplementary file 1. [file elife-72769-supp1.xlsx]

## Sheet: CounTable in All
gene	Control-Brachial_1_S1	Control-Brachial_10_S10	Control-Brachial_4_S4	Control-Brachial_7_S7	Control-Lumber_12_S12	Control-Lumber_3_S3	Control-Lumber_6_S6	Control-Lumber_9_S9	Control-Thoracic_11_S11	Control-Thoracic_2_S2	Control-Thoracic_5_S5	Control-Thoracic_8_S8	Mutant-Brachial_13_S13	Mutant-Brachial_16_S16	Mutant-Brachial_19_S19	Mutant-Brachial_22_S22	Mutant-Lumber_15_S15	Mutant-Lumber_18_S18	Mutant-Lumber_21_S21	Mutant-Lumber_24_S24	Mutant-Thoracic_14_S14	Mutant-Thoracic_17_S17	Mutant-Thoracic_20_S20	Mutant-Thoracic_23_S23
0610006L08Rik	1	0	2	1	1	0	1	0	2	8	0	0	0	0	0	0	0	0	1	0	1	2	2	4
0610007P14Rik	1987	1596	1844	2089	1786	1746	1462	1573	1839	2186	1954	1332	1683	1772	1289	1544	1732	1690	1769	2093	2029	1465	1752	1811
0610009B22Rik	1547	1252	1577	1733	1213	1445	1332	1204	1418	1702	1642	1047	1419	1558	1170	1201	865	1370	1362	1527	1317	1218	1399	1454
0610009E02Rik	33	14	13	23	8	13	16	19	18	9	17	15	18	14	15	20	9	14	16	22	13	31	14	16
0610009L18Rik	143	100	125	119	98	151	119	120	136	173	123	94	89	113	102	112	95	144	139	122	126	131	154	105
0610009O20Rik	835	937	895	838	859	1253	882	732	978	917	926	604	1273	949	597	692	953	991	1228	1050	1095	796	922	912
0610010F05Rik	9582	9566	11747	10785	8669	9046	8423	7942	11044	8929	11841	8364	10466	9453	6123	7342	7612	8045	7350	9110	8885	7435	8193	8612
0610010K14Rik	72	51	52	64	53	84	59	51	56	59	80	27	103	64	35	32	77	52	74	54	49	53	47	53
0610011F06Rik	1111	942	1094	1277	945	1119	798	889	1131	1202	1087	806	1175	964	833	946	834	914	1168	1185	1178	769	1141	934
0610012D04Rik	0	0	0	0	3	0	0	0	0	0	0	0	0	0	0	0	0	0	0	0	0	0	0	1
0610012G03Rik	2123	1835	2262	2288	1867	2037	1887	1786	2466	2528	2563	1775	2075	1981	1660	1704	1831	2034	1834	2058	2238	1585	2027	1877
0610025J13Rik	4	3	9	9	5	9	15	1	0	6	4	2	4	2	0	7	5	2	4	6	2	7	5	7
0610030E20Rik	1193	1169	1111	1119	1212	1597	1193	1034	1216	1161	1223	730	1624	1308	486	1017	1083	1039	1096	1585	1102	942	859	991
0610031O16Rik	1	0	1	0	0	0	6	2	2	0	0	1	2	0	0	2	3	0	1	0	0	8	0	0
0610033M10Rik	2	0	0	8	0	2	2	0	6	0	3	0	6	3	2	0	0	0	0	1	2	0	0	1
0610037L13Rik	1037	969	1003	1137	1096	1170	898	970	1127	1353	1242	746	1251	1129	859	932	996	954	1133	1355	1148	929	1057	1239
0610038B21Rik	7	4	10	0	6	6	10	0	7	3	0	1	2	6	6	6	4	11	4	9	3	7	1	2
0610039K10Rik	8	5	3	6	8	6	5	11	6	1	2	5	9	4	3	0	1	1	3	13	1	4	0	7
0610040B10Rik	141	146	136	201	114	141	159	119	168	214	193	136	130	128	110	104	105	168	131	190	112	116	162	180
0610040F04Rik	1	0	1	0	3	2	11	3	0	5	3	0	1	3	0	1	0	2	1	1	0	1	0	0
0610040J01Rik	55	119	106	122	96	58	64	52	102	116	95	89	310	264	91	150	140	165	124	209	235	185	202	148
0610043K17Rik	19	29	16	33	17	20	16	15	20	17	5	9	18	18	10	14	19	27	20	21	5	5	21	10
1010001B22Rik	12	9	8	10	11	7	10	4	14	13	15	8	1	5	6	10	8	6	6	15	5	10	6	12
1010001N08Rik	0	0	1	0	0	1	1	1	0	0	0	2	7	1	5	3	2	4	1	3	2	4	0	5
1110001J03Rik	662	558	689	730	489	573	605	543	823	815	808	516	574	566	595	540	483	701	500	644	604	579	612	638
1110002E22Rik	10	12	30	23	7	4	10	4	10	27	10	0	0	10	31	5	6	1	2	4	15	17	11	5
1110002J07Rik	87	76	105	110	111	109	105	73	145	109	119	84	119	99	141	116	111	123	117	144	108	109	130	145
1110002L01Rik	243	269	323	249	244	248	210	182	301	220	329	198	212	204	195	163	185	226	200	166	214	223	184	191
1110002O04Rik	2	3	1	3	2	4	19	0	0	0	0	0	0	1	0	0	1	0	0	1	0	0	0	3
1110003F10Rik	15	11	4	3	4	4	6	7	3	6	11	3	16	4	14	17	7	4	1	15	8	11	2	9
1110004E09Rik	920	815	1045	965	843	833	766	863	1014	1011	1020	650	904	938	708	747	883	918	868	920	907	822	776	803
1110004F10Rik	9362	7053	9453	9862	8414	9150	8440	7769	8437	10431	9324	6894	9811	9611	6372	7848	9373	9745	8161	11334	10645	8074	8395	10380
1110006O24Rik	52	47	84	98	49	106	63	64	62	93	69	56	81	58	44	58	42	57	62	71	50	47	77	56
1110008E08Rik	1	0	0	1	2	0	4	0	0	1	0	0	0	0	0	0	0	0	0	0	2	0	0	0
1110008F13Rik	1193	929	1280	1357	1047	1266	1152	1151	1131	1423	1366	888	1099	1224	826	998	1060	1257	1190	1306	1291	1057	1082	1277
1110008L16Rik	636	575	546	663	476	680	420	387	594	583	606	445	699	586	310	398	498	548	465	559	414	407	372	502
1110008P14Rik	1374	1421	1604	1543	1300	1086	1139	1130	2031	1716	1704	1085	1486	1549	1181	1222	1414	1842	1061	1291	1795	1580	1523	1199
1110012L19Rik	369	342	429	477	370	245	368	277	520	390	489	313	366	434	308	317	289	370	314	374	334	334	326	367
1110015O18Rik	245	117	137	136	71	163	119	100	81	216	121	119	30	121	97	75	86	92	102	137	78	68	87	131
1110017D15Rik	87	62	83	56	47	78	84	76	63	95	88	28	93	109	84	74	61	74	61	67	67	86	76	72
1110018N20Rik	9	6	3	3	5	6	13	0	14	8	6	6	14	8	4	6	4	11	7	6	10	19	3	6
1110019D14Rik	43	41	64	51	58	38	67	66	67	42	56	45	55	31	42	37	67	69	41	72	44	38	37	37
1110020A21Rik	37	26	36	25	23	48	38	42	26	32	57	19	34	35	19	25	24	29	29	45	25	23	16	26
1110025L11Rik	0	0	0	0	0	0	4	0	0	0	0	0	0	0	0	0	0	0	0	0	0	0	0	0
1110025M09Rik	1	11	5	2	11	9	19	8	5	8	8	8	24	8	17	7	9	8	15	18	15	4	4	7
1110028F11Rik	2	0	0	0	0	1	5	0	1	0	0	1	0	0	0	0	0	1	0	1	0	0	0	0
1110028F18Rik	3	0	0	0	2	0	11	1	0	3	3	1	0	1	0	1	1	0	3	0	4	1	0	2
1110032A03Rik	1100	914	1174	1116	889	1024	1142	1028	1074	1193	1332	798	907	864	710	786	848	1045	850	1109	1078	898	917	859
1110032F04Rik	421	424	375	313	129	329	104	167	214	288	169	143	512	501	229	249	214	374	322	260	223	226	368	218
1110034G24Rik	548	553	578	594	531	640	475	512	612	787	559	425	659	593	381	597	457	531	634	741	630	551	589	689
1110035H17Rik	5	2	2	1	3	0	12	1	3	3	1	6	4	4	1	0	6	0	0	0	4	1	1	0
1110036E04Rik	0	0	0	0	0	0	4	0	0	3	0	0	0	0	0	0	0	0	0	1	2	0	0	0
1110037F02Rik	3095	3082	3224	2908	3590	3823	2698	2839	3162	2621	2989	2186	3750	2988	1538	2550	3683	2630	2478	3390	2752	2907	2036	2902
1110038B12Rik	1415	926	1144	1298	986	1534	1128	1271	981	1644	1146	925	1208	1049	620	1129	1103	1284	1275	1607	1342	971	1190	1397
1110038F14Rik	1255	1010	1063	1251	1254	1233	1012	1091	1296	1388	1192	810	1263	1160	902	1050	1315	1251	1270	1502	1244	1001	1180	1299
1110046J04Rik	23	25	15	9	10	4	18	6	37	15	30	4	6	17	4	2	12	21	6	6	9	11	19	4
1110051M20Rik	4374	3919	4639	5037	4166	4119	4311	4003	4663	4328	4779	3471	4374	4077	3035	3146	4132	4179	4038	4573	4277	3216	3797	3614
1110057P08Rik	0	0	0	0	0	0	4	0	0	0	0	0	0	0	0	0	0	0	0	0	0	0	0	0
1110059E24Rik	1414	1154	1420	1275	1239	1153	1316	1151	1358	1465	1552	967	1055	1261	933	896	1220	1434	1068	1630	1446	1173	1162	1309
1110059G10Rik	646	498	531	618	531	651	540	538	633	713	659	474	570	479	405	527	553	533	534	803	639	450	535	585
1110060G06Rik	4	5	7	0	3	4	7	2	3	4	2	3	3	7	4	2	6	1	0	9	2	9	4	9
1110065P20Rik	536	494	526	587	458	436	423	481	612	664	499	364	441	473	340	451	419	478	459	454	552	433	465	435
1190002N15Rik	4799	4075	4849	4613	6953	6981	7729	6596	5955	6556	7505	5462	5637	6817	2148	4201	6752	7870	6850	7354	6133	6220	5430	6413
1190003K10Rik	16	5	4	2	0	5	15	7	3	10	7	3	0	7	2	6	0	0	1	1	0	5	7	2
1190005I06Rik	9	2	11	11	0	4	0	2	6	3	2	7	3	5	2	9	3	7	7	9	4	8	10	10
1190007I07Rik	269	231	239	311	177	220	220	237	222	271	288	198	177	206	149	171	113	209	131	154	170	159	162	178
1200007C13Rik	0	0	0	0	0	0	7	0	0	1	0	0	0	0	0	0	0	0	0	1	0	0	0	0
1300002E11Rik	407	392	425	488	511	592	434	513	503	498	545	378	472	448	308	427	529	576	535	611	524	430	404	503
1300017J02Rik	3	18	3	14	9	16	46	10	12	13	11	8	15	8	4	6	2	5	10	12	3	31	2	4
1500002C15Rik	125	130	132	176	142	182	144	165	147	126	124	101	181	121	100	109	201	138	135	196	168	108	135	158
1500002F19Rik	10	0	3	2	4	1	14	0	3	9	0	2	11	4	4	2	4	0	5	8	4	3	5	1
1500004A13Rik	4028	3982	4235	4213	4389	4901	4505	3829	4534	3902	4766	3391	5331	4085	2041	3173	4633	4249	3817	4813	4469	3614	3583	3780
1500005C15Rik	4	1	5	0	1	0	2	1	1	4	6	1	7	0	0	4	1	0	3	0	2	0	0	2
1500009C09Rik	399	327	480	412	248	348	287	320	351	453	392	219	278	313	163	340	345	258	326	314	268	207	277	326
1500009L16Rik	919	578	820	813	595	557	549	506	863	844	796	460	748	860	731	625	618	684	540	737	883	750	704	747
1500011B03Rik	4799	3717	4767	4499	3704	4113	3774	3538	4620	5308	4989	3310	4186	4012	2677	3127	3680	3596	3137	3915	4409	3386	3350	3586
1500011K16Rik	195	161	207	204	139	166	112	155	215	205	229	158	148	196	150	126	90	143	152	171	135	159	149	201
1500012K07Rik	1	6	1	5	3	12	36	3	0	1	1	0	4	0	1	2	2	0	7	4	1	11	2	4
1500015A07Rik	318	227	264	328	285	303	261	244	284	300	289	215	257	278	155	246	249	299	222	322	261	167	230	213
1500015L24Rik	0	0	0	0	3	5	3	2	0	0	0	0	0	0	0	0	0	0	0	0	0	4	0	1
1500015O10Rik	5	6	0	5	4	0	15	1	1	4	4	9	4	4	10	2	4	7	10	8	0	2	0	4
1500017E21Rik	4	3	3	10	8	12	20	8	9	2	12	2	5	3	6	2	4	8	2	2	7	6	5	0
1500026H17Rik	103	101	123	106	117	97	90	86	127	138	98	63	111	68	63	69	63	51	63	95	36	52	97	88
1500035N22Rik	46	19	57	51	11	33	24	22	27	45	29	37	24	27	13	28	1	6	15	11	6	33	20	27
1520401A03Rik	18	6	6	8	10	7	20	2	3	18	2	1	12	1	1	6	5	6	9	4	7	9	0	4
1600002D24Rik	0	3	1	0	0	9	0	3	0	2	5	0	0	0	0	0	0	2	1	0	3	6	0	1
1600002H07Rik	489	464	433	619	546	508	455	418	517	444	500	356	647	583	290	431	513	439	643	746	605	361	568	533
1600002K03Rik	462	329	394	328	330	465	282	249	341	407	291	210	291	387	193	308	231	311	392	356	336	313	321	278
1600010M07Rik	1	1	1	7	0	3	8	3	1	2	2	1	0	2	0	0	0	0	0	0	0	1	0	1
1600012H06Rik	1616	1188	1233	1372	1376	1941	1128	1272	995	1602	1144	901	1890	1149	814	1265	1402	1038	1418	1891	1488	1046	1354	1741
1600012P17Rik	1	0	0	0	1	0	2	0	1	0	0	1	0	0	0	0	0	0	0	1	0	0	0	0
1600014C10Rik	1087	1679	1343	1372	1125	1033	1083	728	1784	1096	1225	951	1249	1263	804	788	1030	1235	1220	1018	967	1105	1186	916
1600014C23Rik	0	0	5	1	0	0	0	3	0	0	0	0	0	0	0	2	0	0	0	1	4	2	1	1
1600015I10Rik	3	0	0	0	0	0	3	0	0	0	0	0	0	0	0	0	0	0	0	0	0	0	0	0
1600017P15Rik	18	9	8	14	6	6	5	5	6	13	13	12	24	8	2	6	15	7	11	10	15	10	9	8
1600019K03Rik	0	0	0	0	0	3	12	0	0	2	2	1	0	0	0	1	0	0	0	0	0	1	0	0
1600020E01Rik	1648	1286	1502	1505	1361	1774	1734	1256	1230	1885	1669	958	1597	1590	610	1362	1104	1370	1485	1953	1309	1446	1398	1659
1600023N17Rik	55	30	77	54	31	32	37	26	35	45	38	30	31	31	34	35	13	35	28	29	31	20	25	36
1600025M17Rik	2	0	2	0	1	0	6	1	0	0	0	0	0	0	0	0	0	0	0	0	0	1	0	0
1600029O15Rik	121	311	317	230	401	147	219	174	655	181	349	242	346	344	174	188	278	312	132	164	369	269	299	147
1700001C02Rik	0	0	0	0	1	0	4	0	0	0	1	0	0	0	0	0	1	0	3	1	0	0	0	1
1700001C19Rik	0	4	1	1	2	0	3	4	1	3	3	1	19	9	1	2	6	42	6	4	15	20	15	4
1700001D01Rik	20	21	9	21	30	13	18	12	16	16	13	8	14	14	5	22	21	14	11	23	1	28	14	25
1700001F09Rik	0	0	0	3	1	5	8	3	2	1	2	0	0	0	0	0	4	4	0	4	2	2	0	0
1700001G01Rik	1	0	0	0	1	1	8	1	3	0	2	1	0	5	0	2	2	0	0	0	0	1	0	0
1700001G11Rik	40	18	35	26	23	33	37	26	28	55	31	17	22	34	13	21	17	29	27	30	14	35	20	24
1700001G17Rik	26	32	33	21	24	35	19	24	28	35	32	30	32	17	18	24	15	20	21	24	18	22	23	25
1700001J03Rik	0	0	1	7	3	1	3	0	2	1	1	0	4	3	2	0	0	0	0	2	0	6	3	4
1700001J04Rik	0	0	0	0	0	0	0	0	0	0	0	0	0	0	0	0	0	0	0	0	0	0	1	0
1700001J11Rik	1	2	0	0	2	2	14	2	1	2	0	0	6	3	0	0	2	0	0	1	1	4	0	3
1700001K19Rik	78	78	77	52	125	69	70	62	76	53	112	59	82	50	35	52	68	41	26	98	68	94	55	69
1700001L05Rik	3	8	1	0	0	3	4	1	7	1	4	0	1	9	0	2	3	2	1	2	1	1	0	1
1700001L19Rik	103	130	185	93	121	74	108	86	183	115	137	136	127	102	63	64	88	143	83	81	116	108	129	82
1700001N15Rik	0	0	0	0	0	1	0	0	0	0	0	1	0	0	0	0	0	0	4	0	1	0	0	0
1700001O22Rik	27	24	29	27	53	21	33	24	37	30	30	23	77	114	32	66	97	92	54	54	108	71	48	60
1700001P01Rik	31	12	13	23	18	22	33	29	20	22	22	12	47	28	13	17	16	25	11	16	20	31	19	11
1700003C15Rik	0	0	0	0	0	0	0	0	0	0	1	0	0	0	0	0	0	0	0	0	0	0	0	0
1700003D09Rik	0	0	2	0	0	0	1	0	1	1	0	0	1	0	0	0	0	0	0	0	0	0	0	0
1700003E16Rik	41	52	35	68	56	40	34	45	74	35	27	25	63	40	21	35	35	40	62	48	33	35	57	26
1700003E24Rik	0	0	0	0	0	0	1	0	0	0	0	0	0	0	0	0	0	0	0	0	0	0	0	0
1700003F12Rik	4	15	11	4	18	11	13	7	9	10	8	11	7	6	8	8	16	6	8	16	4	13	7	18
1700003G13Rik	0	1	0	0	1	0	1	0	0	0	1	0	0	1	0	0	0	0	3	0	2	3	0	0
1700003G18Rik	1	4	8	5	9	4	8	2	8	11	0	1	2	5	2	2	5	3	5	9	11	5	4	9
1700003H04Rik	1	0	0	1	0	0	4	0	1	0	0	1	0	0	0	0	0	0	0	0	0	2	0	0
1700003I16Rik	2	1	2	0	0	2	2	1	0	0	0	1	0	0	0	0	0	0	0	5	1	0	1	0
1700003I22Rik	0	0	0	0	0	0	0	0	0	0	1	0	0	0	0	0	0	0	0	2	0	0	0	0
1700003L19Rik	0	0	1	0	0	0	8	1	0	0	0	0	4	0	0	0	0	0	0	0	0	0	0	0
1700003M07Rik	17	6	4	11	15	7	2	4	9	9	11	7	5	13	13	4	16	10	6	6	12	16	8	6
1700003N22Rik	0	1	2	2	0	3	2	1	2	0	3	1	2	2	3	1	1	2	5	0	1	0	2	0
1700003P14Rik	0	0	0	2	0	0	5	0	0	2	1	0	0	0	0	0	2	0	0	0	0	0	0	0
1700006A11Rik	8	1	3	0	0	0	17	0	1	11	0	0	0	0	0	0	0	2	3	2	2	7	0	2
1700006E09Rik	2	2	4	3	3	3	7	2	0	3	0	3	6	4	7	2	3	1	2	7	0	4	2	4
1700006F04Rik	4	8	7	7	4	4	3	3	7	0	2	5	14	4	1	4	1	0	0	0	2	9	2	8
1700006H21Rik	2	0	0	1	3	0	0	0	0	0	0	0	0	2	4	1	0	0	0	0	0	0	1	0
1700006J14Rik	13	19	9	13	17	14	23	15	22	5	13	14	19	7	5	7	14	12	17	10	6	16	16	15
1700006P03Rik	0	0	1	0	0	0	1	0	0	2	0	1	0	0	0	0	0	0	0	0	1	0	1	0
1700007B14Rik	4	2	6	5	0	1	19	0	0	2	2	0	3	4	3	1	2	0	2	2	21	3	7	9
1700007E05Rik	0	1	0	1	1	0	0	0	0	0	0	1	0	0	0	0	1	0	0	1	0	0	0	1
1700007F19Rik	0	0	1	0	0	0	3	0	2	0	0	0	0	0	0	0	0	0	0	0	0	0	0	2
1700007G11Rik	4	7	4	11	13	7	1	9	1	8	5	2	2	3	2	0	5	4	3	5	16	6	12	2
1700007J10Rik	30	31	29	47	39	29	28	30	19	17	44	25	38	18	17	30	33	10	24	60	15	19	8	31
1700007K09Rik	2	5	2	3	3	1	10	4	0	1	7	0	9	5	2	1	2	4	1	3	0	0	4	1
1700007K13Rik	1	5	4	9	13	9	18	9	4	2	3	6	7	3	4	1	19	6	25	5	12	3	7	11
1700007L15Rik	27	19	20	21	22	28	16	20	9	23	34	17	30	16	23	27	31	28	22	41	39	35	26	32
1700007M16Rik	1	0	0	1	1	0	2	0	0	0	0	0	0	0	0	0	0	0	1	0	0	0	0	0
1700007P06Rik	0	0	0	1	0	0	4	0	0	2	0	0	0	0	0	0	1	0	0	0	0	0	0	0
1700008A23Rik	3	2	6	3	0	1	0	0	1	2	6	3	4	7	1	4	2	0	0	1	1	1	2	1
1700008B11Rik	2	0	2	1	1	2	9	2	2	2	1	0	0	0	0	2	2	1	1	2	0	0	0	0
1700008H02Rik	2	2	7	0	2	0	15	0	0	3	3	0	1	0	0	0	0	0	2	0	0	1	2	0
1700008J07Rik	96	87	100	122	79	139	112	91	79	93	111	80	139	83	60	72	91	104	100	121	121	58	75	75
1700008K24Rik	0	1	0	0	0	0	3	0	0	0	4	0	0	0	0	0	1	0	0	0	0	3	0	0
1700008O03Rik	18	32	23	25	17	14	23	4	25	18	20	12	14	17	11	16	13	11	8	14	18	16	19	14
1700008P02Rik	0	0	0	0	0	0	0	0	0	0	1	0	0	0	0	0	0	0	0	0	0	0	0	0
1700009C05Rik	0	0	0	0	0	0	6	0	0	0	0	0	0	0	0	0	0	0	0	0	1	1	2	0
1700009J07Rik	1	1	0	0	0	2	2	2	2	0	0	0	6	1	0	0	0	0	1	0	0	1	0	0
1700009N14Rik	0	1	2	0	3	1	3	0	1	0	0	0	0	0	0	0	0	0	0	0	0	2	0	0
1700010B08Rik	1	1	3	2	0	9	4	0	0	2	0	0	0	2	0	1	0	3	0	0	0	6	0	0
1700010B13Rik	5	8	11	15	1	0	17	5	11	1	2	3	4	5	6	0	0	0	2	4	0	1	0	3
1700010D01Rik	0	0	1	0	0	0	1	0	0	1	0	0	0	0	0	0	1	0	0	0	0	0	0	0
1700010H22Rik	0	0	1	0	0	0	5	0	0	2	0	0	1	1	0	0	0	3	0	0	0	0	0	0
1700010I02Rik	0	1	0	0	1	0	3	0	0	0	0	0	0	0	0	0	0	0	0	0	0	0	0	0
1700010I14Rik	148	95	86	90	121	105	110	115	88	109	87	77	118	70	32	91	152	93	109	128	129	109	87	95
1700010J16Rik	0	0	0	1	2	4	11	0	1	0	0	0	1	0	0	1	0	0	3	1	1	0	0	2
1700010K23Rik	0	0	0	0	0	0	0	0	0	0	2	0	0	0	0	0	0	1	0	0	0	0	0	0
1700010K24Rik	0	2	1	0	1	0	2	0	1	0	3	0	0	0	1	0	0	0	0	3	0	0	0	1
1700010L04Rik	14	9	13	6	15	6	15	6	6	6	9	1	6	5	13	5	7	11	18	5	9	7	14	8
1700010N08Rik	0	1	0	0	1	0	0	0	0	5	0	0	2	0	1	0	0	0	0	1	1	0	0	0
1700011B04Rik	0	0	0	0	0	0	2	0	0	0	1	0	0	1	0	0	0	0	0	0	0	0	0	0
1700011C11Rik	0	0	0	0	0	0	0	0	0	0	0	0	0	0	0	0	0	0	0	0	2	0	0	0
1700011D18Rik	0	0	0	1	1	0	0	0	0	0	1	0	0	2	0	0	0	1	0	2	0	0	0	1
1700011E24Rik	5	0	5	2	6	1	7	3	9	8	6	3	3	8	6	7	2	3	3	5	2	5	2	2
1700011H14Rik	39	45	36	28	44	32	54	34	29	16	52	41	30	40	10	21	32	24	39	44	18	37	40	21
1700011I03Rik	2	2	1	0	3	0	6	0	0	0	1	0	0	0	0	1	1	0	0	0	0	1	0	2
1700011L22Rik	2	2	1	0	1	1	3	2	3	0	1	3	0	4	1	0	3	2	0	1	2	3	4	0
1700011M02Rik	0	0	0	0	0	0	0	0	0	0	0	0	0	0	0	0	0	0	0	0	0	0	0	0
1700012A03Rik	3	0	3	0	1	1	6	1	1	0	0	0	0	0	0	0	0	0	0	0	0	0	0	1
1700012B07Rik	0	1	0	1	0	0	2	1	3	0	0	0	0	0	3	0	1	0	0	0	2	3	0	0
1700012B09Rik	1	0	0	0	0	0	3	1	0	2	0	0	0	0	0	3	1	0	0	0	0	0	0	1
1700012C08Rik	0	0	0	0	0	0	0	0	0	0	0	0	0	0	0	0	0	0	0	0	0	0	0	0
1700012C14Rik	7	1	1	7	0	2	2	5	4	3	7	4	3	8	5	1	3	2	11	4	0	11	4	1
1700012D16Rik	0	0	0	0	0	3	1	0	2	0	0	0	0	0	1	1	1	0	0	0	0	0	6	0
1700012E03Rik	0	0	3	2	0	0	1	0	0	2	0	0	0	0	1	0	0	0	0	0	0	0	0	0
1700012I11Rik	0	0	2	0	0	0	6	0	0	1	0	0	0	2	0	1	1	1	0	0	0	3	0	0
1700012J22Rik	0	0	0	0	0	0	11	0	0	0	0	1	0	0	0	0	0	0	0	0	0	1	0	0
1700012L04Rik	1	3	0	0	1	1	0	5	0	0	0	0	2	1	0	1	0	1	0	0	2	0	0	2
1700012P22Rik	0	0	0	0	2	0	1	0	0	0	0	0	1	0	0	0	0	0	0	0	2	2	0	0
1700013A02Rik	0	0	0	0	0	0	0	0	0	0	0	0	0	0	0	0	0	0	0	0	0	0	0	1
1700013D24Rik	0	0	2	0	2	5	5	0	0	0	0	0	0	1	0	0	0	0	0	0	0	0	0	0
1700013F07Rik	1	11	8	8	1	2	18	6	6	14	3	15	7	6	4	3	3	9	15	5	2	2	0	2
1700013G24Rik	0	0	0	0	0	0	0	0	1	0	0	0	0	0	0	0	0	0	0	0	0	0	0	0
1700013H16Rik	1	0	0	2	0	0	3	0	0	0	0	0	0	0	0	0	1	0	0	1	0	1	1	0
1700013M08Rik	0	0	0	0	0	0	1	0	0	0	0	1	1	0	2	0	0	0	0	0	3	0	0	1
1700013N06Rik	0	0	0	0	0	0	0	0	0	1	0	1	0	0	0	0	0	0	0	0	0	0	0	0
1700014D04Rik	14	13	10	14	13	17	8	0	11	9	3	3	5	1	2	14	20	17	1	23	0	15	1	14
1700014F14Rik	0	0	0	0	0	0	0	0	0	0	0	0	0	0	0	0	0	0	0	0	1	0	0	0
1700015C17Rik	0	2	0	0	1	0	0	0	0	2	0	0	0	3	0	0	0	0	0	1	0	0	0	1
1700015E13Rik	8	20	6	15	11	5	3	3	20	11	5	3	13	13	2	9	25	4	10	6	1	19	8	9
1700015F17Rik	0	0	0	0	3	0	1	0	1	1	2	0	2	2	0	0	2	1	2	3	0	2	0	1
1700015G11Rik	0	1	0	0	0	1	0	0	0	0	1	0	0	0	0	0	0	3	0	0	0	0	0	0
1700015O11Rik	2	0	2	0	0	2	4	2	1	1	1	0	4	1	0	1	1	0	0	0	0	2	0	1
1700016A09Rik	7	6	3	5	0	6	9	16	10	4	11	8	2	3	5	3	6	6	8	5	0	5	14	5
1700016B15Rik	4	3	1	2	1	1	0	0	6	0	5	1	0	5	0	1	3	8	1	1	0	2	0	2
1700016C15Rik	7	11	11	3	10	14	11	7	7	2	10	5	10	12	8	7	7	3	4	8	5	8	0	14
1700016D06Rik	2	2	1	3	1	4	20	0	3	1	4	0	1	0	0	1	0	0	2	1	1	8	0	0
1700016D08Rik	0	0	0	0	0	0	0	0	0	0	0	0	0	0	0	0	0	0	0	0	0	0	0	0
1700016F12Rik	0	0	0	0	0	0	8	0	1	1	0	0	0	0	0	0	0	0	0	0	0	0	0	0
1700016G14Rik	3	0	0	0	0	0	1	0	0	0	0	0	0	2	1	1	0	2	0	1	0	0	0	0
1700016G22Rik	0	2	0	0	1	0	0	0	0	0	1	0	0	0	3	2	0	0	0	0	0	0	0	0
1700016H13Rik	20	7	12	8	6	23	23	9	9	19	14	10	7	18	10	12	24	20	14	14	32	13	25	6
1700016K19Rik	10	1	3	0	1	8	0	2	5	8	7	7	0	4	0	2	1	4	4	1	2	1	1	0
1700016L21Rik	0	0	0	0	0	0	2	1	0	0	0	1	0	0	0	0	0	0	0	0	0	0	0	0
1700016P03Rik	16	14	25	12	18	14	7	15	8	18	11	8	17	15	15	26	14	8	14	20	11	9	9	9
1700016P04Rik	0	0	0	0	0	0	2	0	0	0	1	0	0	0	0	0	0	0	0	0	0	0	0	0
1700017B05Rik	238	203	220	199	306	190	194	192	338	249	337	219	441	432	140	179	299	220	95	223	288	236	189	270
1700017D01Rik	0	2	0	0	0	0	5	3	0	0	0	0	1	0	0	0	0	0	0	0	2	0	5	0
1700017G19Rik	4	3	0	0	0	5	19	1	0	6	0	4	0	3	0	1	0	0	1	1	2	1	0	0
1700017I07Rik	0	0	1	0	0	0	2	0	0	0	0	0	0	0	0	0	0	0	0	0	0	0	0	0
1700017J07Rik	0	1	0	0	2	0	0	0	0	1	0	0	0	0	0	0	0	0	0	0	0	0	0	0
1700017L05Rik	0	0	0	0	0	0	0	0	0	0	0	0	0	1	0	0	0	0	0	0	0	0	0	1
1700017N19Rik	2	4	4	4	1	1	19	4	0	13	6	2	1	2	0	0	1	0	2	5	4	1	1	0
1700018A04Rik	2	2	2	0	1	9	7	2	1	0	3	2	15	15	3	11	6	4	1	7	29	20	12	6
1700018A14Rik	10	9	13	8	9	4	4	11	8	6	5	12	8	4	0	4	7	4	9	11	8	3	1	3
1700018B08Rik	7	5	6	2	0	4	8	0	3	1	0	0	2	0	0	4	0	0	1	0	1	2	0	1
1700018B24Rik	0	3	0	0	0	0	0	0	0	0	0	0	0	0	0	0	0	0	0	0	0	1	0	0
1700018C11Rik	0	0	2	0	2	2	4	0	1	0	2	2	0	0	2	0	1	0	0	0	0	0	1	0
1700018F24Rik	2	0	0	4	0	1	1	0	0	0	0	0	0	0	5	0	0	0	0	2	3	6	0	0
1700018L02Rik	32	11	21	17	21	25	16	11	17	14	17	10	16	21	12	13	17	10	19	7	16	6	13	14
1700018M17Rik	0	0	0	0	0	2	0	0	1	0	0	1	0	0	1	0	0	0	0	1	0	0	0	0
1700019A02Rik	4	3	0	0	4	4	11	4	2	1	3	0	0	4	1	4	2	1	4	2	2	3	0	3
1700019A23Rik	0	0	0	0	0	0	0	1	0	0	1	1	0	1	2	0	0	0	0	0	0	1	1	0
1700019B03Rik	3	6	11	12	5	14	15	6	5	6	27	1	7	2	11	1	4	8	1	0	2	15	3	7
1700019B21Rik	1	0	0	0	0	1	3	0	0	0	0	0	0	2	2	0	0	0	0	0	0	0	0	0
1700019D03Rik	21	10	24	11	22	17	39	8	9	19	19	14	39	22	10	15	7	18	30	37	24	15	31	26
1700019E08Rik	6	2	0	0	2	1	1	0	0	2	0	2	0	1	0	0	0	0	1	0	0	0	0	0
1700019G24Rik	0	0	0	1	1	0	4	0	0	0	2	0	0	1	0	0	0	0	0	0	4	0	0	0
1700019M22Rik	0	1	0	0	0	0	0	0	0	0	1	2	0	0	0	0	0	0	0	0	0	0	0	0
1700019N19Rik	1	2	1	0	3	13	8	1	2	3	2	10	0	2	0	2	2	2	0	2	8	6	0	0
1700019O17Rik	0	0	0	0	1	0	0	0	0	0	0	0	0	0	0	0	0	0	0	1	0	0	0	0
1700019P21Rik	0	0	0	0	0	0	1	0	0	1	0	0	0	0	0	0	0	0	0	0	0	0	0	0
1700020A23Rik	1	6	0	0	3	0	4	1	2	0	1	0	7	4	2	6	0	1	2	1	0	1	0	0
1700020D05Rik	6	12	9	13	15	10	19	9	3	12	16	14	3	7	13	5	15	14	1	9	15	10	10	12
1700020G17Rik	2	0	0	1	0	0	1	0	0	0	0	0	0	0	0	2	0	0	0	1	0	0	0	1
1700020I14Rik	5156	5354	6146	5091	5878	5079	4572	4620	5898	4675	5705	4226	4353	3939	2602	3381	4696	3332	3763	4433	4005	3606	3657	3806
1700020L24Rik	0	3	6	2	6	3	3	3	1	7	3	6	2	3	2	4	1	2	0	3	8	7	3	6
1700020M21Rik	2	1	0	0	0	0	3	0	0	2	0	0	0	0	0	0	0	0	0	0	0	0	0	2
1700020N01Rik	1	0	0	0	0	0	2	0	0	0	0	1	0	1	0	0	0	0	0	2	0	0	1	1
1700020N15Rik	0	0	0	0	2	0	0	0	0	0	0	0	0	0	0	0	0	0	0	0	0	0	0	0
1700020N18Rik	0	0	0	0	0	0	0	0	0	5	0	0	0	0	0	0	0	0	0	0	0	0	0	0
1700021A07Rik	2	0	3	1	1	0	13	4	0	1	1	1	0	2	3	0	4	1	0	2	1	2	0	0
1700021F05Rik	882	747	871	956	772	1071	712	751	936	1025	987	652	1026	785	555	729	720	804	853	996	925	762	749	957
1700021F07Rik	0	0	0	0	0	0	1	0	0	0	0	1	0	0	0	0	0	0	0	0	2	1	0	0
1700021F13Rik	0	0	0	0	0	0	1	0	0	0	0	0	0	0	0	0	0	0	0	0	0	0	0	0
1700021J08Rik	3	2	3	2	4	3	1	2	3	3	2	3	2	5	0	0	0	4	0	1	4	2	3	1
1700021L23Rik	1	0	1	0	0	1	1	1	0	0	0	0	0	0	1	0	0	0	0	0	0	0	0	0
1700021N21Rik	13	4	11	20	9	9	14	8	13	14	14	2	6	7	2	14	7	10	21	2	5	3	5	12
1700021P04Rik	0	0	0	0	0	0	1	0	0	0	0	0	0	0	0	0	0	0	0	0	0	0	0	0
1700022A21Rik	3	1	4	0	0	0	0	0	0	9	0	0	1	0	0	0	0	0	1	0	0	0	0	0
1700022A22Rik	2	0	2	2	1	0	11	1	0	0	3	0	0	0	0	0	0	0	1	0	0	1	0	0
1700022E09Rik	0	1	0	0	0	0	3	0	0	0	1	0	0	0	0	0	2	0	0	0	0	0	1	1
1700022F17Rik	0	0	0	0	0	1	0	0	0	0	0	0	1	0	0	0	2	1	0	0	2	0	0	0
1700022H16Rik	0	1	0	0	0	0	0	0	0	0	0	0	0	0	0	0	0	0	0	0	0	0	0	0
1700022I11Rik	10	9	27	32	16	8	24	21	21	3	28	6	7	15	9	14	13	6	8	10	1	17	9	15
1700022N22Rik	21	26	34	24	34	29	27	16	18	25	42	11	28	20	5	28	31	10	17	20	24	29	15	23
1700023C21Rik	0	0	0	2	0	1	3	0	0	0	0	0	0	0	0	0	0	0	0	0	0	0	0	0
1700023F02Rik	2	5	7	3	3	2	15	1	0	2	8	3	1	1	0	0	5	5	6	3	0	1	0	2
1700023F06Rik	18	14	23	19	4	17	17	5	14	19	22	20	18	20	23	9	4	6	14	10	6	17	10	8
1700023G09Rik	0	1	0	0	0	0	11	0	0	1	1	0	0	0	0	0	0	0	0	0	0	0	1	2
1700023H06Rik	17	65	54	105	44	24	57	83	52	17	47	77	7	50	19	15	3	21	61	17	7	112	69	11
1700024B05Rik	2	0	1	2	3	0	7	0	0	0	1	0	0	0	0	0	0	0	0	0	0	0	0	1
1700024B18Rik	1	2	0	0	1	2	5	2	1	0	2	0	3	1	0	0	3	0	2	0	0	0	0	0
1700024G13Rik	7	6	15	9	4	3	10	2	24	0	1	8	1	3	1	3	8	3	7	6	4	4	4	3
1700024J04Rik	0	0	0	0	0	0	2	0	0	0	0	0	0	0	0	0	0	0	0	0	0	0	0	0
1700024P04Rik	0	0	1	0	0	0	0	0	0	0	0	0	0	0	0	0	0	0	0	0	0	0	0	0
1700024P16Rik	57	48	31	72	60	21	39	63	48	36	21	19	61	73	15	10	63	30	43	50	80	25	21	13
1700025A08Rik	17	12	18	10	4	8	5	7	7	9	15	6	17	14	17	13	10	2	0	6	15	20	12	12
1700025B11Rik	0	0	0	0	0	0	3	0	0	1	0	0	0	0	0	0	0	0	0	0	0	0	0	1
1700025C18Rik	0	0	0	0	0	0	1	0	0	0	0	0	0	0	0	0	0	0	0	0	3	0	0	0
1700025D23Rik	0	0	0	0	1	0	1	2	0	0	0	1	0	0	0	0	0	4	0	1	1	0	0	0
1700025F22Rik	0	0	0	0	3	0	4	0	0	0	1	0	0	0	0	1	0	0	0	0	0	0	0	0
1700025F24Rik	6	0	1	1	1	0	0	4	5	2	3	4	0	0	1	0	0	0	1	2	0	5	0	0
1700025G04Rik	3792	3129	3639	3436	4349	4293	4076	3732	3267	3707	3984	2510	4316	4161	2331	3370	4434	3919	3695	5560	3966	3370	3493	4136
1700025H01Rik	0	1	0	0	0	3	6	0	0	0	0	0	0	0	0	0	0	0	0	0	0	0	0	0
1700025J12Rik	2	0	0	0	0	0	1	0	1	0	0	0	0	0	0	0	0	0	0	0	0	0	0	1
1700025K24Rik	2	3	0	2	1	2	10	1	0	3	0	0	0	1	0	2	3	2	1	3	0	2	0	0
1700025M24Rik	0	0	0	0	0	0	0	3	0	0	1	0	1	0	0	0	0	0	0	0	1	0	0	0
1700025N21Rik	9	7	1	4	11	3	8	1	5	1	8	2	10	7	2	6	3	1	2	3	4	7	10	2
1700025N23Rik	0	0	1	0	0	0	6	0	0	0	2	0	0	0	0	0	0	0	0	0	0	1	0	1
1700025O08Rik	0	1	0	0	0	0	2	0	0	0	0	0	0	0	0	0	0	0	0	0	0	2	0	0
1700026D11Rik	1	0	1	0	2	0	4	0	0	2	0	0	0	0	1	0	0	0	0	0	0	0	0	0
1700026F02Rik	0	0	1	0	1	1	0	0	2	0	0	0	2	2	0	1	1	1	0	0	0	0	0	1
1700026J12Rik	0	1	0	2	0	2	12	0	0	0	3	2	0	0	0	1	0	2	0	0	0	1	0	0
1700026J14Rik	10	11	12	19	10	2	6	9	5	6	11	13	8	8	5	14	5	11	0	14	4	6	10	24
1700027A07Rik	4	3	1	3	2	2	4	1	0	6	6	3	1	3	0	5	4	1	2	2	8	1	2	0
1700027A15Rik	0	0	0	0	1	2	0	1	0	0	0	0	0	0	0	0	0	0	0	4	0	0	0	0
1700027F06Rik	0	0	1	0	0	0	1	0	0	0	0	0	0	0	0	0	0	0	0	0	0	0	0	0
1700027F09Rik	0	0	0	0	0	1	5	2	2	0	1	0	1	0	0	1	0	0	0	0	0	2	0	0
1700027H10Rik	4	4	2	16	2	9	5	0	2	3	4	6	5	10	2	2	3	0	3	3	2	2	2	2
1700027I24Rik	0	1	0	0	0	0	3	0	0	0	0	0	0	0	0	0	0	0	0	0	0	1	0	0
1700028B04Rik	3	0	2	1	0	2	3	0	0	0	1	0	0	0	0	0	1	0	0	0	1	0	0	0
1700028D13Rik	3	1	5	0	4	0	1	0	0	1	1	2	6	4	0	1	2	1	0	1	1	5	0	0
1700028E10Rik	110	82	79	130	79	144	102	96	77	103	121	75	113	106	79	81	65	84	71	83	111	51	77	84
1700028I16Rik	1	0	0	0	0	2	1	0	9	2	2	1	2	0	0	0	0	0	0	1	0	0	0	1
1700028J19Rik	39	47	46	77	62	64	80	70	58	62	43	50	73	60	60	52	110	41	49	79	112	52	44	77
1700028K03Rik	9	20	21	20	20	15	65	17	18	10	19	14	21	42	27	15	10	29	8	14	20	31	7	13
1700028M03Rik	0	0	0	0	1	0	2	0	0	0	3	0	0	0	0	0	0	0	0	0	0	1	0	0
1700028N14Rik	8	7	6	2	10	17	7	5	10	8	3	4	14	14	6	6	15	15	4	20	2	7	1	15
1700028P14Rik	1	3	3	0	2	1	4	2	2	2	4	0	0	0	0	0	1	0	3	0	2	1	0	1
1700028P15Rik	0	2	1	0	0	3	2	0	0	0	0	0	0	2	0	0	0	0	0	3	0	1	0	1
1700029B22Rik	1	0	0	0	0	0	8	0	0	0	0	0	0	1	0	1	0	0	0	0	0	1	0	1
1700029B24Rik	0	0	0	0	0	0	0	0	0	0	0	0	0	0	0	0	0	0	0	0	0	0	0	0
1700029E06Rik	0	0	0	0	0	1	0	0	0	0	1	0	0	0	0	0	0	0	1	0	0	0	0	0
1700029F12Rik	1	0	0	0	0	0	11	1	0	2	0	0	0	0	0	1	0	0	0	2	0	1	0	1
1700029H14Rik	7	0	1	4	1	1	14	6	2	2	8	2	3	0	5	1	0	0	3	0	0	0	5	0
1700029I15Rik	125	111	126	134	94	128	104	135	132	110	109	100	133	144	47	71	139	70	124	111	107	61	98	73
1700029J03Rik	0	2	0	2	0	0	7	0	1	2	0	0	0	0	0	1	0	0	1	1	1	2	0	1
1700029J07Rik	150	96	59	151	92	97	119	55	83	140	74	83	120	96	74	103	38	60	59	64	145	57	59	66
1700029M03Rik	0	2	0	0	0	1	8	0	0	0	3	1	0	0	0	0	0	0	1	1	0	0	0	1
1700029M20Rik	1	0	0	1	1	0	1	0	2	0	3	0	0	0	0	0	2	0	0	3	0	0	0	0
1700029N11Rik	0	0	0	1	0	0	0	0	0	0	0	0	0	0	0	0	0	0	0	0	0	0	0	0
1700029P11Rik	0	0	1	0	2	0	0	0	0	0	0	0	0	0	0	0	0	3	0	0	0	0	0	0
1700030A11Rik	3	0	1	0	0	0	0	0	0	0	0	0	0	0	0	0	0	0	0	0	0	6	0	0
1700030C10Rik	49	26	47	45	27	47	31	67	32	48	44	34	8	40	19	8	15	44	24	15	25	52	17	31
1700030C12Rik	9	12	13	11	4	8	8	7	15	11	14	7	7	15	10	3	6	10	5	17	0	12	13	9
1700030C14Rik	5	2	3	3	4	2	0	1	0	1	4	1	1	8	13	1	0	5	1	0	0	1	1	1
1700030F04Rik	0	0	0	2	0	0	10	1	0	2	0	0	0	1	0	0	1	0	1	0	1	0	0	0
1700030I03Rik	0	0	0	0	0	0	5	0	0	0	0	0	0	0	0	0	0	0	2	0	0	0	0	0
1700030J22Rik	307	355	348	355	358	423	335	318	395	386	325	234	366	395	168	215	378	409	311	376	300	287	264	247
1700030K09Rik	781	953	819	986	682	925	672	604	845	1022	841	576	1150	904	557	726	679	750	1028	1026	800	665	1046	963
1700030L20Rik	0	1	1	0	1	2	1	0	0	0	0	0	0	2	0	0	0	0	0	0	0	0	0	0
1700030M09Rik	3	1	2	0	2	5	9	0	0	1	0	3	0	1	0	2	1	0	1	2	0	1	2	2
1700030N03Rik	1	0	0	0	0	1	2	0	0	2	0	0	0	1	0	0	0	0	0	0	0	0	0	0
1700030N18Rik	0	0	0	0	1	0	6	0	0	2	0	0	1	1	0	0	1	2	0	0	0	2	2	0
1700030O20Rik	0	1	0	0	0	0	0	0	0	0	0	0	0	0	0	0	4	0	0	0	0	0	0	0
1700031A10Rik	2	3	1	4	1	2	8	1	1	3	4	0	0	0	0	4	2	2	2	0	2	2	2	2
1700031F05Rik	5	0	1	4	1	3	22	0	0	2	1	2	0	0	0	1	1	3	5	1	2	4	6	0
1700031F10Rik	0	0	0	1	0	0	0	0	0	0	0	0	0	0	0	0	0	0	0	0	0	0	0	0
1700031L13Rik	2	0	2	0	1	0	0	0	0	1	0	2	2	0	0	0	0	0	0	0	0	1	0	0
1700031M16Rik	6	0	0	1	1	0	8	2	0	0	0	0	0	0	0	0	1	0	0	1	0	0	1	0
1700031P21Rik	0	0	0	0	2	0	3	0	0	0	0	0	0	3	0	0	0	0	0	1	0	0	0	1
1700034B16Rik	0	0	0	0	0	0	0	0	0	1	0	0	0	0	0	0	0	0	0	0	0	0	0	1
1700034E13Rik	0	0	0	0	2	1	8	0	1	0	0	0	0	0	0	0	1	0	0	0	0	0	1	0
1700034G24Rik	0	5	0	1	2	0	2	0	1	0	4	0	0	0	0	0	0	0	0	0	0	2	0	0
1700034H15Rik	40	69	71	65	48	52	34	26	56	24	93	33	49	45	26	38	28	35	53	39	22	24	43	13
1700034I23Rik	4	3	6	1	8	13	18	2	4	0	11	5	6	6	2	5	9	0	7	4	4	5	1	1
1700034J04Rik	0	0	0	0	0	0	1	0	0	0	0	0	0	1	0	1	1	0	0	0	0	0	0	2
1700034J05Rik	0	0	0	0	1	0	2	1	0	0	15	0	0	0	1	1	0	0	9	0	0	0	0	0
1700034K08Rik	1	0	1	0	3	0	3	0	0	0	0	0	0	0	0	0	0	0	0	0	0	0	0	0
1700034O15Rik	0	0	0	0	0	4	8	1	0	0	0	0	0	0	0	0	0	0	0	1	0	1	0	0
1700034P13Rik	11	3	14	10	4	4	19	10	5	7	8	5	2	2	2	4	3	5	13	13	7	15	5	2
1700036A12Rik	0	2	0	0	0	1	2	1	2	0	6	2	1	0	0	0	0	0	2	0	2	1	4	1
1700036G14Rik	0	1	0	0	0	0	0	1	0	0	0	0	0	0	0	0	0	0	0	0	0	0	0	0
1700036O09Rik	0	0	0	0	0	0	0	0	0	0	0	0	0	0	0	0	0	0	0	0	0	0	0	0
1700037C06Rik	0	0	1	2	0	0	1	0	0	0	0	0	0	0	0	0	0	0	0	0	0	0	1	0
1700037C18Rik	223	194	217	253	225	187	179	163	234	227	236	166	207	173	146	173	139	167	203	191	159	177	191	198
1700037F24Rik	9	14	18	6	35	8	20	6	11	11	23	6	30	8	12	9	26	14	12	21	1	20	5	5
1700037H04Rik	3620	4198	4113	4075	4116	4465	3836	3702	5529	4363	4861	3121	4554	3996	2653	2558	4676	5138	4361	3752	4711	3533	3936	3091
1700039E15Rik	1	0	1	4	1	1	16	0	1	2	2	0	0	0	0	0	0	0	2	2	2	0	3	1
1700039E22Rik	9	13	17	22	18	20	10	25	10	8	18	6	12	19	1	9	20	10	13	29	7	11	10	12
1700039I01Rik	2	2	1	4	11	2	13	5	3	3	8	2	14	14	13	10	18	11	12	22	19	16	9	18
1700039M10Rik	1	2	2	1	0	3	5	1	3	0	2	3	7	3	3	1	0	0	2	4	1	2	2	3
1700039M15Rik	0	0	5	0	5	0	2	0	0	0	1	0	0	0	0	1	2	0	3	0	0	0	0	0
1700040D17Rik	90	41	83	80	43	65	75	66	58	63	67	58	56	75	67	56	50	56	61	57	53	58	52	56
1700040F15Rik	0	0	0	0	0	0	0	0	0	0	0	0	0	0	0	0	0	0	0	0	0	0	0	0
1700040F17Rik	0	1	0	0	3	4	5	1	8	2	1	1	1	0	0	0	0	1	1	1	0	1	0	2
1700040K01Rik	0	0	0	0	0	0	0	0	0	0	0	0	0	0	0	0	0	0	0	0	0	0	0	0
1700040L02Rik	1	0	2	0	0	0	3	1	3	1	1	0	0	0	0	0	2	0	0	1	0	0	0	0
1700040L08Rik	4	2	1	7	2	1	2	0	1	4	3	4	2	6	2	3	3	9	3	2	0	2	2	2
1700041C23Rik	2	0	2	0	0	0	6	0	0	2	0	0	1	0	0	0	0	0	1	1	0	1	0	2
1700041G16Rik	0	2	4	0	0	0	7	8	3	3	0	1	0	5	0	2	4	8	7	1	1	1	3	3
1700041M05Rik	0	1	0	0	0	0	1	0	0	0	0	0	0	0	0	0	0	0	0	0	0	0	0	0
1700041M19Rik	0	0	0	0	2	1	5	0	0	0	0	0	0	0	0	0	1	0	0	0	0	0	0	0
1700042D02Rik	0	0	0	0	0	0	1	0	0	1	0	0	0	0	0	0	0	0	0	0	0	0	0	0
1700042G07Rik	0	2	0	0	0	0	2	0	0	0	0	0	0	0	0	0	0	0	0	0	2	0	0	0
1700042G15Rik	0	1	1	0	0	0	3	2	3	0	0	0	0	0	0	0	0	0	0	0	0	0	0	0
1700042O10Rik	4	0	0	0	1	0	5	0	0	0	5	1	0	3	0	1	1	1	0	0	0	3	1	1
1700044C05Rik	0	0	0	0	0	1	3	0	1	0	0	1	0	0	0	0	0	0	0	0	0	0	2	1
1700044K03Rik	0	0	0	0	0	0	0	0	0	0	0	0	0	0	0	0	0	0	0	1	0	0	0	0
1700045H11Rik	0	1	1	1	1	1	0	0	0	1	1	0	0	0	0	0	0	0	0	1	0	0	0	1
1700045I11Rik	0	0	0	0	0	0	0	0	0	0	0	0	0	0	0	0	0	0	0	0	0	0	0	0
1700046C09Rik	0	0	2	0	0	0	0	1	0	0	0	0	0	0	0	0	0	3	0	0	0	1	0	0
1700047A11Rik	1	3	1	1	2	4	4	1	2	0	4	0	2	2	4	2	2	0	0	4	2	1	2	6
1700047F07Rik	0	0	0	1	0	0	2	1	3	0	0	3	0	0	0	0	0	0	0	0	0	4	0	1
1700047G03Rik	3	0	0	0	0	2	7	1	1	0	0	0	0	0	3	0	1	0	0	3	0	2	0	0
1700047I17Rik2	0	0	0	0	0	0	0	0	0	0	0	0	0	0	0	0	0	0	0	0	0	0	0	0
1700047K16Rik	8	7	10	16	7	11	12	7	7	9	21	5	27	12	3	9	5	5	9	3	13	14	11	8
1700047L14Rik	0	0	3	2	0	0	2	0	0	0	0	0	0	1	0	0	0	1	0	0	0	1	0	0
1700047M11Rik	15	2	0	7	2	6	0	0	4	5	5	0	4	0	4	0	2	0	7	1	0	6	4	1
1700047N06Rik	2	7	4	3	4	4	5	11	4	8	3	0	2	5	0	1	3	5	1	10	2	0	1	4
1700048F04Rik	0	0	0	0	0	0	0	0	2	0	0	0	0	0	0	0	0	1	2	1	0	0	0	0
1700048M11Rik	4	2	3	7	2	1	4	0	0	1	1	1	2	3	2	7	0	2	1	0	2	0	0	2
1700048O20Rik	1641	880	1145	1680	817	1493	801	1101	894	1604	980	946	1226	991	742	811	936	1053	1216	1098	1206	1121	1166	993
1700049E15Rik	2	0	3	0	0	1	5	0	0	2	0	1	0	0	0	0	0	0	2	0	1	0	0	0
1700049E17Rik1	0	0	0	0	0	0	0	0	0	0	0	0	0	0	0	0	0	0	0	0	0	0	0	0
1700049E17Rik2	0	0	0	0	0	0	0	1	0	0	0	0	0	0	0	0	0	0	0	0	0	0	0	0
1700049E22Rik	0	0	0	0	0	1	5	0	0	0	0	0	0	0	0	0	0	0	0	0	0	0	0	0
1700049G17Rik	825	937	910	885	730	1007	612	893	910	822	782	631	1187	707	540	749	684	559	841	989	565	567	696	830
1700049J03Rik	0	0	1	0	0	0	0	0	0	0	2	0	0	0	0	0	0	0	0	0	0	0	0	1
1700049L16Rik	0	0	1	0	0	0	0	0	0	0	0	0	0	0	0	0	0	0	0	0	0	0	0	0
1700051A21Rik	0	0	1	1	0	0	7	0	0	4	0	1	0	1	2	1	0	0	0	0	1	11	0	2
1700051K13Rik	0	2	0	0	0	0	0	0	0	0	0	0	0	0	0	0	0	1	0	1	0	0	0	0
1700051O22Rik	2	0	1	0	2	0	0	0	0	0	0	0	0	0	3	0	0	0	1	1	3	0	0	0
1700052I22Rik	0	0	0	0	3	0	0	0	0	0	0	0	0	0	0	0	0	0	0	0	0	0	0	0
1700052K11Rik	514	578	396	536	552	617	445	510	505	475	473	329	586	442	309	287	347	470	680	527	417	339	508	414
1700054A03Rik	0	0	0	1	0	0	4	0	0	0	0	0	0	0	0	0	0	0	3	0	0	0	0	0
1700054K02Rik	0	0	0	0	0	0	0	0	0	0	0	0	0	0	0	0	0	0	0	0	0	0	0	0
1700054K19Rik	4	0	2	2	0	1	2	0	0	0	0	0	0	0	0	0	0	0	0	0	0	0	0	0
1700054M17Rik	1	0	0	1	0	1	7	0	0	2	0	1	0	1	0	0	0	0	0	0	1	5	0	0
1700054O19Rik	0	0	0	0	0	0	1	0	0	0	0	0	0	0	0	0	0	0	0	1	0	0	1	0
1700055C04Rik	0	0	0	0	0	1	4	0	0	1	0	0	0	1	0	0	1	0	0	0	0	1	0	0
1700055D18Rik	29	29	17	11	19	14	9	4	8	28	7	9	16	23	10	14	7	34	11	20	4	18	15	15
1700056E22Rik	18	25	18	19	20	33	31	14	23	27	23	13	32	25	16	14	28	48	19	17	27	19	24	16
1700056N10Rik	84	94	89	67	135	79	132	77	86	38	108	60	78	94	42	74	90	77	74	132	54	105	53	79
1700057G04Rik	3	0	0	0	3	5	6	2	1	0	4	0	1	1	0	0	0	0	2	0	1	1	1	0
1700057H15Rik	4	4	0	1	9	4	9	1	12	1	0	0	2	0	0	0	1	5	6	4	8	0	1	2
1700057H21Rik	0	0	0	0	1	0	3	0	0	4	1	0	0	0	0	0	0	0	1	0	0	0	0	0
1700058P15Rik	8	9	2	1	7	4	5	4	6	4	9	10	6	4	12	6	2	3	9	9	4	2	3	5
1700060C16Rik	0	0	0	0	0	0	5	2	0	2	7	2	1	0	0	0	0	0	0	1	0	7	0	0
1700060C20Rik	7	2	5	4	2	3	9	2	1	3	6	3	1	2	8	1	2	2	5	0	4	2	1	4
1700060J05Rik	16	20	20	16	9	13	14	9	11	4	14	8	8	18	9	11	19	4	4	8	12	13	3	6
1700060O08Rik	2	0	1	0	2	2	0	0	0	0	0	0	3	0	0	0	0	0	0	0	0	0	0	0
1700061E17Rik	0	0	0	0	0	0	0	0	0	0	0	1	0	0	0	0	0	0	0	0	0	0	0	0
1700061E18Rik	0	0	0	2	0	0	0	0	1	3	0	0	1	0	0	1	0	1	0	0	0	0	0	0
1700061F12Rik	0	0	1	4	0	0	6	2	0	2	0	0	0	0	0	1	0	0	0	0	1	0	0	0
1700061G19Rik	119	81	125	122	98	50	167	72	74	66	94	80	107	123	56	81	36	67	63	132	50	143	40	69
1700061H18Rik	0	0	0	0	0	0	2	0	0	0	0	0	0	0	0	0	0	0	0	0	0	0	0	0
1700061I17Rik	0	0	0	0	1	1	8	6	1	2	0	0	4	1	1	1	0	0	0	1	0	1	0	0
1700061J23Rik	0	1	1	3	0	2	1	3	1	0	1	0	0	0	0	0	0	0	1	0	0	2	0	0
1700063A18Rik	1	1	0	5	0	0	0	0	1	1	1	0	0	0	0	0	0	0	0	0	0	0	0	0
1700063D05Rik	1	0	1	0	1	0	3	0	0	0	0	0	5	1	2	1	0	0	0	1	2	0	0	1
1700063H04Rik	0	0	0	0	0	0	0	0	0	0	0	0	0	0	0	0	0	0	0	0	0	0	1	0
1700063H06Rik	0	0	0	0	0	0	1	0	0	0	0	0	0	0	0	0	0	0	0	0	0	0	0	0
1700063I16Rik	0	6	1	3	1	6	5	1	6	6	7	3	5	8	0	1	1	1	0	2	0	1	5	4
1700063K16Rik	0	1	0	0	0	1	1	0	0	0	0	0	0	0	0	0	0	0	0	0	0	0	0	0
1700063O14Rik	0	0	0	0	0	0	1	0	0	0	0	0	0	0	0	0	0	0	0	0	0	0	0	0
1700064H15Rik	2	0	4	5	1	1	8	3	3	3	8	2	1	5	3	3	2	8	7	0	3	5	1	2
1700064J06Rik	0	0	0	1	0	1	3	0	0	1	0	9	0	0	0	0	0	0	0	0	0	0	0	0
1700064M15Rik	1	1	1	0	3	0	5	2	1	1	2	0	2	2	2	1	1	1	6	4	0	0	3	6
1700065D16Rik	5	1	5	4	4	8	9	1	5	10	9	10	1	1	0	6	1	8	2	3	0	5	7	7
1700065I16Rik	0	3	0	0	1	2	2	0	0	2	0	0	0	0	0	0	1	1	0	0	0	0	0	0
1700065J11Rik	0	0	0	0	0	0	1	1	0	0	0	0	0	0	0	0	0	0	0	0	1	0	0	0
1700065J18Rik	4	3	0	1	3	0	0	0	3	2	3	0	0	1	1	1	0	0	4	0	0	0	0	3
1700065L07Rik	0	0	1	0	0	0	1	0	0	2	0	0	0	0	0	0	0	0	0	0	0	0	1	0
1700065O20Rik	1	0	0	4	1	0	8	0	0	3	0	1	1	0	0	0	0	0	0	0	6	0	0	1
1700066B17Rik	9	4	5	2	5	13	15	5	2	5	1	4	7	6	0	1	5	7	4	6	11	1	3	3
1700066B19Rik	8	5	4	9	2	11	6	1	3	5	9	0	7	4	4	4	2	2	3	0	0	4	2	3
1700066C05Rik	0	0	1	0	0	0	0	0	0	0	0	0	0	0	0	0	0	0	0	0	0	0	0	0
1700066J03Rik	0	0	2	3	0	1	3	1	0	7	0	0	0	0	1	0	0	1	1	1	5	0	1	0
1700066M21Rik	1164	639	954	1029	541	1055	566	663	637	1021	774	543	1099	895	521	927	606	487	624	988	920	580	871	948
1700066N21Rik	0	0	0	0	1	1	0	0	0	0	0	0	0	0	0	0	0	0	0	0	0	0	0	0
1700066O22Rik	1	1	0	0	0	1	5	1	0	1	0	0	0	3	0	1	0	0	0	1	0	1	0	0
1700067G17Rik	0	0	0	0	0	0	0	0	0	7	0	0	0	0	0	0	0	0	0	0	0	0	0	0
1700067K01Rik	20	26	22	6	22	29	23	10	21	7	25	17	27	43	8	16	15	13	16	26	20	35	8	14
1700067P10Rik	1	0	1	0	2	3	8	1	1	1	1	0	0	0	0	0	0	0	1	0	0	1	1	3
1700069B07Rik	0	4	7	4	1	0	0	0	1	0	0	4	4	3	0	3	0	4	2	3	0	7	1	1
1700069L16Rik	0	4	5	2	6	2	5	1	3	1	4	0	0	0	1	5	1	2	0	3	1	1	2	2
1700069P05Rik	0	0	1	0	0	0	7	0	0	0	0	1	0	0	0	0	0	0	0	0	0	2	0	0
1700071G01Rik	0	0	3	0	3	0	10	1	1	0	3	0	0	0	0	2	0	0	5	2	3	3	0	1
1700071K01Rik	0	0	0	0	0	0	1	0	0	4	0	0	0	1	0	0	1	0	0	0	0	0	0	0
1700071M16Rik	9	7	7	15	17	3	22	6	8	6	8	11	4	8	1	4	4	2	1	7	15	1	6	9
1700072B07Rik	1	0	0	0	0	2	6	0	0	0	0	0	0	0	0	0	0	0	0	0	0	0	0	0
1700072G22Rik	0	0	0	0	0	0	0	1	0	0	0	0	0	0	0	0	0	1	0	0	0	0	0	0
1700072O05Rik	0	0	0	0	0	1	2	0	0	0	0	0	0	0	0	0	0	0	0	0	0	0	0	0
1700073E17Rik	0	0	2	0	1	2	5	2	0	0	0	0	0	0	1	0	1	2	0	0	0	3	0	0
1700074A21Rik	0	0	0	0	0	0	0	0	0	0	0	0	0	0	0	0	0	0	0	0	0	0	3	0
1700074H08Rik	0	1	2	0	4	4	16	0	3	4	0	0	1	0	0	0	0	0	0	0	0	2	0	0
1700074P13Rik	2	0	4	0	0	1	18	1	4	1	3	0	2	0	1	3	2	0	3	3	0	4	0	3
1700080E11Rik	0	0	0	0	0	0	2	0	0	0	0	0	0	0	0	0	0	0	0	0	0	0	0	0
1700080G11Rik	0	0	1	0	3	0	3	0	1	1	0	0	0	0	0	0	0	0	0	0	0	2	0	0
1700080N15Rik	0	1	2	0	2	6	3	1	3	1	1	0	1	1	0	0	3	0	0	0	0	1	0	0
1700080O16Rik	0	0	0	0	0	0	5	0	0	0	0	0	0	0	0	0	0	0	0	0	0	0	0	0
1700081H04Rik	0	0	0	0	0	0	0	0	0	0	0	0	0	1	0	1	1	0	0	2	0	1	1	0
1700082M22Rik	16	11	9	10	12	12	12	15	18	14	19	7	12	9	4	6	13	13	9	12	4	7	7	9
1700083H02Rik	0	0	0	0	0	3	3	0	0	0	1	3	0	1	0	0	0	0	0	0	0	1	0	0
1700084C06Rik	36	37	31	61	25	18	36	43	46	35	39	27	46	43	30	17	24	25	25	33	22	16	21	19
1700084E18Rik	36	20	28	41	47	33	41	39	32	29	37	22	24	38	27	32	44	36	17	39	26	35	23	24
1700084F23Rik	1	8	7	0	3	0	11	0	6	1	7	1	0	5	3	0	1	6	1	0	0	15	5	0
1700084J12Rik	0	6	6	1	4	11	11	1	3	3	16	1	1	7	0	4	0	0	0	10	6	4	1	5
1700084M14Rik	1	0	0	2	0	0	3	0	0	0	0	3	0	0	0	0	1	0	0	0	0	0	0	1
1700085C21Rik	0	1	2	0	0	0	11	2	0	0	2	3	1	3	0	1	0	0	1	0	0	3	0	0
1700086D15Rik	1	8	4	5	5	2	4	4	4	5	13	0	10	6	2	12	15	5	7	7	6	14	1	8
1700086L19Rik	67	44	39	65	21	51	45	23	21	37	46	37	13	37	13	33	9	20	23	22	12	24	31	20
1700086O06Rik	203	136	205	228	204	221	202	229	210	203	210	185	173	201	123	115	166	188	184	209	244	191	166	182
1700086P04Rik	37	27	26	38	37	32	37	41	47	44	44	27	17	53	36	27	27	58	39	43	38	48	34	45
1700087M22Rik	0	2	0	0	1	0	1	0	1	0	0	0	0	0	0	1	0	0	0	1	0	0	0	0
1700088E04Rik	33	23	24	30	32	34	31	42	28	44	39	21	21	8	18	23	23	38	42	27	23	23	28	23
1700091H14Rik	0	0	0	0	0	0	1	0	0	0	0	0	0	0	0	0	0	0	0	2	0	0	0	0
1700092C02Rik	0	2	0	0	0	1	6	0	1	2	0	0	0	2	0	0	0	0	0	1	0	0	0	0
1700092C10Rik	0	0	0	0	0	0	4	0	0	0	0	0	0	0	0	0	0	0	0	0	0	0	0	0
1700092C17Rik	0	1	1	0	0	0	0	0	0	2	0	0	0	0	0	0	0	0	0	0	0	0	2	0
1700092E19Rik	0	0	3	1	1	1	4	0	0	1	3	2	0	0	0	0	0	0	1	0	0	0	0	0
1700092K14Rik	0	0	0	0	3	0	1	1	2	0	0	0	0	0	0	0	0	2	0	0	0	0	0	0
1700092M07Rik	7	5	8	9	6	6	13	5	8	7	18	6	4	5	7	2	13	8	8	1	0	6	3	3
1700093J21Rik	10	12	10	19	18	19	15	18	21	16	14	12	16	1	5	19	11	11	21	10	10	14	17	13
1700093K21Rik	6	3	1	16	2	7	27	0	4	4	4	3	7	4	4	9	1	0	2	7	1	5	1	5
1700094J05Rik	0	0	0	0	0	0	0	0	0	2	0	0	0	0	0	0	0	1	0	0	0	0	0	0
1700094M24Rik	0	2	0	1	0	0	0	0	0	0	0	0	0	0	0	0	0	0	0	0	0	0	0	0
1700095A13Rik	0	0	0	0	2	0	6	0	0	0	2	2	0	5	0	0	0	0	0	0	0	0	0	0
1700095A21Rik	1	1	1	1	0	0	8	0	1	0	0	0	6	0	0	0	0	2	0	0	0	0	1	0
1700095B10Rik	0	0	0	0	0	1	0	0	0	0	1	4	0	0	0	0	0	0	0	0	4	2	0	0
1700095J03Rik	82	92	120	159	73	130	99	76	88	109	132	89	207	140	130	124	141	133	136	147	155	121	141	103
1700095J07Rik	3	1	2	0	3	0	7	0	3	7	2	1	1	0	0	1	0	3	1	1	0	6	0	1
1700095J12Rik	8	3	3	4	13	3	16	4	8	7	9	3	14	5	0	6	3	5	8	7	5	1	0	6
1700095K22Rik	0	0	0	0	0	0	1	1	0	0	0	0	0	0	0	0	0	0	0	0	0	0	0	0
1700096J18Rik	0	0	0	0	0	0	1	3	0	0	0	0	0	0	0	0	0	0	0	0	0	0	0	0
1700096K18Rik	295	246	309	473	245	284	261	318	278	276	308	299	145	272	164	294	132	281	245	307	185	221	154	321
1700097M23Rik	4	3	4	4	4	0	13	3	0	3	0	1	0	0	0	1	0	0	0	6	0	4	1	0
1700097N02Rik	0	1	0	0	0	3	9	0	0	0	4	2	1	0	0	1	2	1	0	0	0	0	0	0
1700099I09Rik	0	0	1	3	1	0	1	0	1	0	0	0	0	0	0	0	0	0	0	0	0	0	0	1
1700100L14Rik	1	5	0	0	0	1	2	1	3	2	1	10	1	2	1	1	0	0	1	1	0	0	3	1
1700101I11Rik	62	49	67	75	34	27	52	52	61	46	61	27	37	49	38	37	28	47	42	54	47	39	61	43
1700101I19Rik	3	1	3	5	2	6	1	1	4	2	2	0	1	0	0	3	2	2	3	0	1	0	2	1
1700101O22Rik	0	1	0	0	0	0	2	0	0	0	0	0	0	0	0	0	0	0	0	0	0	0	0	0
1700102F20Rik	0	1	0	0	0	2	1	0	1	4	1	0	0	0	0	0	0	0	0	0	0	0	0	0
1700102P08Rik	152	208	251	185	211	201	257	118	204	105	239	100	267	241	86	119	172	223	117	183	138	231	140	137
1700104B16Rik	7	2	8	10	5	10	5	2	2	11	5	15	5	4	10	2	3	7	9	7	13	11	5	11
1700105P06Rik	53	36	47	26	46	51	39	59	42	43	38	35	33	40	45	25	47	48	46	36	49	38	32	32
1700108F19Rik	5	10	2	2	16	14	13	5	3	15	0	4	8	4	3	6	3	12	15	11	8	15	1	4
1700108J01Rik	0	0	0	0	0	0	0	1	0	0	0	0	0	0	0	0	0	0	0	0	0	0	0	0
1700108N11Rik	0	0	0	0	0	0	0	0	0	0	0	0	0	0	0	0	0	0	0	0	0	0	0	0
1700109G14Rik	4	16	3	5	2	6	21	0	10	14	7	7	1	4	4	6	3	0	4	8	3	3	0	1
1700109G15Rik	4	10	6	16	6	8	12	6	8	12	10	2	6	7	3	15	15	18	24	10	9	0	6	4
1700109H08Rik	198	181	159	166	228	197	237	132	155	114	227	76	312	268	72	203	235	131	153	326	164	141	119	220
1700109I08Rik	0	0	0	1	0	0	4	1	0	4	0	0	0	0	0	0	0	0	0	0	0	0	0	0
1700109K24Rik	60	63	65	50	100	50	48	50	51	48	90	40	44	54	31	70	53	27	33	99	44	54	36	73
1700110C19Rik	13	3	5	5	5	12	6	2	12	11	12	5	6	9	1	5	9	4	1	6	3	13	17	7
1700110I01Rik	2	3	0	1	0	0	0	5	0	0	0	1	0	0	2	1	0	0	0	1	0	1	0	0
1700110I07Rik	0	0	0	0	0	0	2	0	0	0	0	0	0	0	0	0	0	0	0	0	0	0	0	2
1700110K17Rik	1	0	0	0	0	0	8	0	0	0	1	0	0	0	0	0	0	0	0	0	0	1	0	0
1700111E14Rik	0	2	0	3	8	5	3	1	6	1	3	2	1	3	1	3	1	4	0	6	1	2	0	4
1700111N16Rik	1	1	0	2	2	0	10	2	6	4	1	0	0	0	0	0	1	0	0	0	1	6	1	2
1700112D23Rik	9	21	18	26	23	23	26	30	25	17	23	7	12	23	26	20	17	23	13	17	20	18	26	17
1700112E06Rik	34	31	22	21	53	42	39	32	26	39	31	29	27	13	20	13	41	43	46	40	40	30	29	23
1700112H15Rik	0	1	0	0	0	1	0	0	0	0	1	0	0	1	0	0	1	0	0	0	0	1	2	1
1700112J05Rik	3	0	1	3	1	3	3	0	0	0	1	0	1	0	1	0	0	2	0	0	4	0	0	3
1700112J16Rik	49	31	65	48	32	55	60	56	58	46	50	34	50	56	51	33	30	39	29	40	24	29	28	36
1700112K13Rik	4	1	0	0	0	1	4	0	0	0	0	0	0	3	0	0	0	0	0	0	0	1	0	0
1700113A16Rik	28	18	31	35	16	21	20	19	30	32	22	13	14	15	25	20	21	17	21	24	28	16	17	20
1700113B19Rik	0	0	0	0	0	0	4	0	0	0	0	0	2	0	0	0	0	0	0	0	0	0	0	0
1700113H08Rik	18	13	21	16	9	8	13	11	12	20	9	6	19	7	9	6	10	9	9	6	4	11	7	15
1700116B05Rik	0	0	0	0	1	0	2	0	1	0	0	0	1	0	0	0	0	0	0	0	0	0	0	0
1700119H24Rik	0	0	0	0	0	0	2	0	0	1	0	0	0	0	0	0	2	0	0	0	0	0	0	0
1700119I11Rik	0	0	0	0	0	0	1	0	0	1	0	0	0	0	0	0	0	0	0	0	0	0	0	0
1700120B22Rik	0	2	1	0	1	0	0	1	0	0	0	0	0	1	0	0	1	1	0	1	0	0	1	3
1700120C14Rik	41	50	62	37	33	70	36	38	50	63	46	56	53	53	66	36	35	42	58	46	64	57	37	50
1700120C18Rik	1	5	2	1	6	2	3	0	1	0	1	5	0	4	2	3	0	1	0	3	1	0	0	0
1700120E14Rik	0	0	0	0	0	0	1	0	0	1	0	0	0	0	0	1	0	0	0	1	0	0	0	0
1700120G07Rik	2	0	0	0	0	1	8	1	1	5	0	0	1	0	0	0	0	1	0	2	0	2	0	0
1700120G11Rik	0	0	0	0	0	0	4	1	0	0	0	0	0	0	0	0	0	0	0	0	0	0	1	0
1700120K04Rik	0	0	0	0	0	0	0	0	0	0	0	0	0	0	0	0	0	0	0	0	0	0	0	0
1700120O09Rik	8	2	3	3	8	1	7	2	6	2	7	3	4	4	1	8	3	9	5	7	1	6	3	13
1700121C08Rik	0	0	0	1	0	0	1	0	0	0	2	0	0	0	0	1	0	1	0	0	0	0	1	0
1700121L03Rik	1	2	5	1	1	1	5	2	3	12	1	12	0	5	0	0	2	1	4	1	0	4	1	1
1700121L16Rik	0	0	0	0	0	0	0	0	0	0	0	0	0	0	0	0	0	0	0	0	0	0	0	0
1700121N20Rik	0	0	0	0	0	0	2	0	0	0	0	0	0	0	0	0	0	0	0	0	3	0	4	0
1700122D07Rik	2	0	0	0	2	0	0	0	0	1	0	0	0	0	0	0	0	0	0	0	0	0	0	0
1700122E12Rik	5	4	8	1	0	2	4	8	8	6	2	3	5	0	8	0	1	2	2	3	1	3	4	6
1700122O11Rik	0	0	0	3	0	0	1	0	1	0	0	1	0	4	0	0	0	0	0	0	1	0	0	0
1700123I01Rik	19	9	6	3	12	15	25	2	7	15	12	2	20	9	3	14	9	8	15	14	4	20	2	4
1700123K08Rik	12	3	1	1	6	0	5	0	2	2	3	0	0	1	3	2	1	0	0	4	0	1	6	0
1700123L14Rik	4	1	6	0	0	1	7	0	0	3	3	0	2	3	3	2	0	0	0	9	0	1	0	1
1700123M08Rik	27	16	27	37	20	27	38	41	35	43	46	37	30	43	20	23	22	26	29	35	34	27	23	29
1700123O12Rik	1	0	0	1	0	0	7	0	0	3	3	2	0	0	0	0	0	0	0	0	0	1	1	0
1700123O20Rik	1364	1484	1481	1654	1482	1546	1419	1367	1803	1702	1561	1172	1490	1582	873	962	1408	1654	1634	1500	1501	1160	1347	1294
1700123O21Rik	6	6	6	20	6	6	11	4	7	1	10	0	12	14	0	7	8	4	0	7	3	7	1	10
1700124L16Rik	25	7	16	31	19	27	11	6	15	15	28	10	22	13	10	12	15	8	15	18	11	18	10	16
1700125G02Rik	24	14	14	19	34	14	42	21	34	12	16	18	24	22	8	24	36	14	25	31	11	18	19	14
1700125G22Rik	2	1	1	4	0	0	3	1	0	1	0	0	0	0	0	0	1	0	4	0	0	0	0	0
1700125H03Rik	3	4	3	4	0	7	14	8	1	8	2	8	2	4	3	0	5	6	5	9	1	2	3	2
1700125H20Rik	15	8	14	15	4	16	12	4	13	15	6	12	10	11	16	3	8	9	6	8	4	10	10	7
1700126A01Rik	0	0	0	0	1	0	3	0	0	0	0	0	0	0	0	0	0	0	0	4	0	0	6	0
1700126G02Rik	1	2	6	0	1	2	7	0	1	2	3	1	0	2	0	4	1	1	6	0	0	1	0	1
1700126H18Rik	0	1	0	0	0	0	1	0	0	0	1	2	0	0	0	0	1	1	0	0	0	1	0	0
1700128A07Rik	0	0	0	0	0	0	3	0	0	0	0	0	0	0	1	0	0	0	2	0	2	0	0	0
1700128E19Rik	11	13	1	9	28	38	6	23	14	7	1	3	6	0	18	10	48	16	17	43	3	13	0	16
1700128F08Rik	0	0	0	0	0	0	0	0	0	2	0	0	0	1	0	0	0	0	0	0	0	0	0	0
1700129C05Rik	0	2	0	1	1	2	1	0	0	0	0	0	0	1	0	0	0	0	0	1	0	0	0	0
1700129L04Rik	4	1	6	0	1	0	8	0	1	0	0	5	6	0	0	0	0	1	0	2	4	1	1	3
1810006J02Rik	0	0	3	0	0	1	1	0	0	0	1	1	0	0	0	0	0	0	0	1	0	0	0	0
1810007C17Rik	0	1	0	0	0	0	2	2	0	1	0	2	0	0	0	0	0	0	0	0	0	2	0	0
1810007D17Rik	0	0	0	0	1	1	3	1	0	3	0	0	0	0	1	0	0	0	0	0	0	1	0	0
1810008B01Rik	2	0	0	1	0	0	2	0	0	0	4	0	0	3	3	0	1	0	2	3	0	1	0	1
1810008I18Rik	0	0	0	4	1	1	12	3	2	0	0	0	0	0	0	2	0	0	0	0	0	0	0	0
1810009A15Rik	4	2	4	1	1	5	1	3	0	1	3	0	4	3	3	0	2	8	2	3	2	0	4	0
1810009J06Rik	0	0	0	0	0	0	0	0	0	0	0	0	0	0	0	0	0	0	0	0	0	0	1	0
1810010D01Rik	14	2	0	2	3	8	8	0	5	3	4	0	4	5	3	7	2	6	4	8	1	0	5	4
1810010H24Rik	387	332	452	484	387	482	372	385	283	406	405	386	559	538	316	293	431	477	501	534	430	333	428	374
1810010K12Rik	1	2	1	0	0	0	1	0	0	0	0	0	0	0	0	0	0	0	0	0	0	6	0	2
1810011H11Rik	0	1	1	0	0	2	5	0	0	0	0	0	0	2	0	0	0	0	0	0	0	1	1	1
1810011O10Rik	196	163	252	243	208	200	174	187	296	328	310	173	278	318	212	286	284	251	198	325	267	332	338	333
1810012K08Rik	13	11	7	7	15	16	6	13	8	15	10	11	6	5	5	7	12	1	4	11	3	1	1	2
1810012K16Rik	10	6	1	2	5	8	5	5	5	14	2	1	12	6	7	3	1	5	2	6	0	1	2	9
1810013D15Rik	10	3	7	6	2	5	5	1	7	5	18	1	7	4	15	1	1	1	3	4	6	6	3	2
1810013L24Rik	5669	5912	6455	5000	7398	8196	7406	4887	6432	5609	6491	3503	6133	6778	2438	3680	6744	7348	5495	5822	5444	4861	4069	4896
1810014B01Rik	70	50	49	71	65	93	57	71	66	100	77	76	49	58	54	50	57	64	61	62	51	58	53	49
1810017P11Rik	1	0	0	0	0	3	8	0	0	0	0	0	0	0	0	0	0	0	0	0	0	0	0	0
1810018F18Rik	0	4	3	0	1	2	15	7	4	6	2	0	0	3	2	1	0	0	2	2	0	2	6	2
1810019D21Rik	0	1	0	0	1	3	3	0	3	1	1	0	5	2	6	0	0	0	5	0	0	15	3	0
1810019N24Rik	3	1	3	3	5	2	2	5	0	0	1	0	2	4	0	0	4	2	6	4	0	0	1	2
1810020O05Rik	0	2	0	2	0	0	5	0	0	0	0	1	1	0	0	0	1	0	0	0	0	5	0	0
1810021B22Rik	38	52	40	37	48	49	35	44	76	62	43	25	67	51	43	29	39	70	69	61	57	48	39	46
1810022K09Rik	1823	1314	1749	1612	1466	1500	1616	1407	1611	1968	2111	1243	1547	1526	776	1300	1613	1292	1274	1907	1920	1553	1157	1649
1810024B03Rik	49	53	57	56	70	63	67	57	82	51	72	32	63	77	56	61	62	76	58	108	65	48	33	76
1810026B05Rik	10082	7398	8269	9371	8627	13341	9044	9089	8462	12617	8883	6997	11681	9474	4090	8239	8403	9631	11041	12156	11127	6567	9886	10467
1810026J23Rik	10984	9134	11653	10274	10651	10421	10094	9475	9994	10436	11807	7935	10729	9523	5660	8145	10918	9458	9834	12204	10816	8138	8907	10015
1810030O07Rik	1646	1355	1701	1730	1376	1480	1496	1489	1665	1442	1537	1239	1873	1647	1053	1222	1387	1562	1404	1611	1613	1352	1383	1452
1810032O08Rik	886	520	673	896	598	1131	710	769	576	1087	683	622	977	851	322	799	726	850	924	1080	876	707	784	919
1810034E14Rik	1	7	5	3	11	7	6	4	2	7	9	0	6	11	4	4	4	8	0	5	16	8	2	9
1810037I17Rik	496	500	598	597	456	483	449	456	683	602	636	409	478	536	518	423	427	592	473	502	573	555	505	499
1810041H14Rik	26	12	24	16	29	27	27	26	16	24	13	12	16	22	18	21	24	13	26	14	4	11	10	15
1810041L15Rik	1628	2585	1801	2194	2754	2027	1452	1536	3245	1709	1662	1815	5227	4771	2537	2803	4700	4065	3074	3169	3735	3138	3950	2926
1810043G02Rik	1735	1513	1653	1727	1664	1693	1384	1330	1673	1702	1676	1277	1789	1467	919	1275	1618	1310	1460	1845	1526	1122	1267	1526
1810043H04Rik	323	245	265	292	209	268	235	265	219	244	285	187	309	190	150	216	218	268	224	265	263	220	183	218
1810044D09Rik	42	32	28	54	29	33	42	57	39	34	47	42	32	56	32	40	28	33	49	38	31	42	24	25
1810046K07Rik	2	0	0	0	1	2	11	0	0	0	0	0	0	0	0	0	0	0	0	0	0	2	0	0
1810049J17Rik	0	0	0	0	1	2	0	2	0	1	0	0	1	0	2	0	0	1	0	1	0	0	0	0
1810053B23Rik	0	1	0	0	2	2	6	3	0	1	3	0	0	3	0	1	0	0	0	3	7	3	0	0
1810055G02Rik	2981	2180	2807	2721	2588	3313	2607	2541	2531	2764	2731	2010	2907	2681	1308	2516	2899	2543	2654	3547	2937	2009	2316	2818
1810058I24Rik	1503	1411	1823	1722	1537	1390	1603	1420	1893	1947	1950	1312	1402	1466	1119	1227	1421	1886	1372	1654	1757	1398	1408	1476
1810059C17Rik	3	3	1	5	3	6	2	1	3	3	4	3	1	7	4	11	1	2	5	2	0	1	1	4
1810059H22Rik	6	2	7	6	9	1	10	1	2	4	6	2	0	5	1	1	0	0	3	3	9	6	9	3
1810062G17Rik	1	2	4	1	2	1	1	1	10	2	1	3	4	2	1	1	0	0	3	1	0	2	2	0
1810062O18Rik	23	35	18	24	32	23	20	29	15	19	16	14	27	16	11	17	20	15	9	24	12	14	15	17
1810063I02Rik	0	0	0	0	0	0	1	0	0	0	0	0	0	0	0	0	0	0	0	1	0	0	0	0
1810064F22Rik	6	2	6	6	6	8	13	1	7	22	4	3	0	2	0	5	1	4	2	5	16	5	1	0
1810065E05Rik	2	0	0	0	0	0	14	0	0	1	0	0	0	0	0	2	1	0	0	0	0	1	0	2
2010001A14Rik	55	74	79	78	84	90	73	100	78	92	86	48	104	83	60	66	109	85	81	101	94	84	94	84
2010001K21Rik	1	0	5	3	1	1	1	2	0	0	1	0	5	3	0	0	0	2	0	0	3	0	1	1
2010003K11Rik	0	1	0	1	2	0	1	0	3	0	2	1	0	1	0	0	1	0	0	0	0	0	0	1
2010005H15Rik	1	1	1	0	1	2	6	0	0	3	0	1	0	3	1	0	1	0	0	0	0	0	0	0
2010007H06Rik	0	1	1	1	0	4	7	0	2	1	2	0	0	4	0	0	1	1	0	0	0	0	3	1
2010008C14Rik	4	3	3	1	6	1	4	5	5	2	11	9	1	0	0	1	0	2	4	2	3	1	3	1
2010009K17Rik	2	2	0	2	1	3	0	0	2	1	1	2	0	5	2	0	1	0	1	1	0	4	1	0
2010010A06Rik	14	0	4	3	3	2	1	1	8	2	2	2	7	3	0	0	2	1	7	1	2	0	0	6
2010013B24Rik	1	3	0	0	0	0	8	0	0	2	0	0	0	0	0	0	0	0	0	0	0	0	0	0
2010015M23Rik	86	109	124	125	119	130	105	77	124	135	115	92	141	91	60	57	97	111	103	97	104	69	97	90
2010016I18Rik	1	3	3	5	1	2	6	3	0	0	0	0	1	0	3	1	0	0	0	0	0	0	2	0
2010103J01Rik	1	1	1	0	1	0	0	0	1	2	2	0	0	3	0	1	0	0	0	0	2	1	0	1
2010106C02Rik	3	0	1	1	1	0	6	0	0	1	1	0	0	0	0	0	0	0	0	0	0	0	0	1
2010106E10Rik	0	0	0	0	1	1	4	0	0	5	0	0	0	1	0	0	0	1	1	0	0	0	0	4
2010107E04Rik	1643	1407	1788	1676	1242	1395	1648	1442	1870	1894	1942	1179	1155	1433	1351	1280	1306	1903	1186	1505	1618	1560	1518	1535
2010107G12Rik	43	30	40	47	35	43	44	26	48	46	28	16	46	17	11	45	41	68	67	42	18	40	39	22
2010107G23Rik	2175	1525	2165	2240	1372	2014	1623	1475	1576	2608	1963	1493	2185	2172	1625	2259	1626	1751	2067	2351	2242	2005	2393	2534
2010109A12Rik	14	23	13	11	15	15	18	14	7	6	19	4	12	13	4	16	25	24	12	22	9	32	6	12
2010109I03Rik	0	0	3	2	0	10	14	2	2	10	11	1	4	0	0	0	2	0	1	3	0	1	2	1
2010109P13Rik	0	0	0	0	0	0	3	0	0	0	0	0	0	0	0	0	0	1	0	0	0	0	0	0
2010110E17Rik	1	1	2	0	2	1	1	0	1	1	1	3	0	4	0	3	2	0	0	0	4	4	3	1
2010110G14Rik	0	0	0	0	0	0	0	0	0	0	0	0	0	0	0	0	0	0	0	0	0	0	0	1
2010110K18Rik	10	7	4	5	13	11	8	1	6	5	11	3	13	7	11	3	4	3	2	11	3	1	4	8
2010111I01Rik	936	920	881	765	1070	939	865	696	883	787	1094	518	1337	1210	471	834	1098	829	779	1163	989	817	692	964
2010204K13Rik	37	46	67	41	38	35	43	32	47	69	54	34	15	31	22	23	23	38	25	28	64	52	38	27
2010300C02Rik	87	87	175	150	25	55	28	40	62	60	82	71	300	372	254	197	151	206	91	89	250	278	237	144
2010300F17Rik	27	12	15	19	11	7	16	14	1	1	1	4	1	10	7	9	4	8	0	7	0	9	4	1
2010308F09Rik	10	12	9	10	10	6	13	7	10	16	9	5	9	10	9	5	14	11	11	5	5	10	10	3
2010309G21Rik	0	0	0	0	3	0	0	0	1	0	0	0	2	0	2	0	0	0	0	1	0	0	0	0
2010310C07Rik	11	2	4	2	5	2	1	1	0	1	13	1	8	11	0	0	2	0	2	0	0	8	0	0
2010315B03Rik	362	268	359	288	251	227	238	258	315	430	360	171	211	352	136	215	128	224	175	222	205	193	220	226
2010320M18Rik	359	255	390	355	251	265	265	274	349	348	299	210	281	286	264	221	219	224	253	281	272	253	299	289
2010320O07Rik	2	1	2	0	0	2	2	1	2	1	4	3	2	0	0	0	1	0	1	1	2	0	0	2
2200002A13Rik	9	8	11	3	14	2	14	11	11	0	15	11	13	13	0	6	10	2	1	11	3	13	5	5
2200002D01Rik	11	23	32	17	27	18	21	17	24	28	23	8	36	26	6	5	36	9	16	32	18	17	19	14
2200002J24Rik	0	0	0	0	0	0	5	4	0	8	0	0	0	1	0	3	0	0	0	0	0	0	0	0
2200007N16Rik	0	0	0	0	0	0	1	0	2	0	0	0	0	0	0	0	0	0	1	0	0	0	0	0
2210008F06Rik	349	374	361	416	233	277	237	260	364	461	425	199	347	308	298	253	211	234	253	270	274	200	278	210
2210010C04Rik	2	2	1	0	1	1	2	1	1	6	2	0	0	4	0	1	0	0	1	1	1	0	0	1
2210011C24Rik	12	12	6	19	6	14	5	6	4	5	10	8	32	42	29	24	24	21	12	11	38	30	14	27
2210011K15Rik	1	5	0	4	4	3	25	12	8	9	10	7	0	3	4	1	2	0	4	5	8	6	0	14
2210013O21Rik	1312	947	1285	1258	814	924	1017	847	1290	1397	1419	830	810	892	714	734	726	952	837	839	1019	808	995	818
2210016F16Rik	1399	1309	1358	1596	1429	1292	1263	1217	1505	1455	1496	1020	1517	1583	1176	1243	1420	1554	1327	1618	1624	1379	1403	1382
2210016L21Rik	2373	1979	2724	2623	1758	1934	1938	1852	2481	2311	2702	1761	2203	2004	1300	1590	1588	1987	1803	1799	2145	1666	1964	1677
2210017I01Rik	0	0	0	0	0	1	2	0	0	0	0	0	0	0	0	0	0	0	0	0	0	0	0	0
2210019I11Rik	0	1	0	0	0	0	3	0	0	1	0	0	8	6	2	0	1	1	0	3	2	3	1	1
2210404O09Rik	316	312	349	327	352	279	275	315	386	341	364	277	367	306	246	310	285	220	278	417	319	265	390	460
2210406H18Rik	9	14	15	26	17	20	31	14	18	6	6	8	21	22	8	24	12	1	14	33	8	15	0	24
2210406O10Rik	37	21	39	30	28	19	54	23	37	39	48	14	26	27	13	22	16	38	15	13	33	26	20	19
2210407C18Rik	0	0	0	0	2	0	0	0	0	0	1	0	0	0	0	0	0	0	0	0	0	0	0	0
2210408F21Rik	2	4	3	4	2	2	13	1	0	8	3	4	4	3	4	7	3	3	9	6	2	5	1	5
2210408I21Rik	655	714	683	791	708	712	676	742	649	518	739	512	613	536	246	433	540	596	637	725	611	604	429	595
2210409E12Rik	0	0	0	3	0	0	0	0	0	0	0	0	2	0	0	0	0	0	0	0	0	0	0	0
2210411M09Rik	0	0	0	1	1	0	5	0	0	3	1	0	0	0	1	0	0	0	0	0	2	0	0	0
2210412B16Rik	3	0	4	2	0	2	6	2	3	2	1	1	3	4	0	3	5	2	2	1	2	1	0	3
2210414B05Rik	0	0	0	1	0	4	0	0	0	0	0	0	0	1	0	0	0	0	1	0	0	0	0	0
2210417A02Rik	0	0	0	0	0	1	0	0	0	4	0	0	0	0	0	0	0	0	0	0	0	1	0	0
2210418O10Rik	1	1	0	0	1	0	1	0	4	2	1	0	0	0	0	0	0	1	0	0	0	1	0	0
2210420H20Rik	0	0	1	0	1	0	0	0	0	0	0	0	0	0	0	1	0	0	0	0	0	1	0	0
2300002M23Rik	0	0	0	0	0	0	0	0	0	0	0	0	0	0	2	0	0	0	0	0	0	0	0	0
2300003K06Rik	0	0	0	0	0	1	1	0	0	0	1	0	1	0	0	0	0	0	0	0	0	0	0	0
2300009A05Rik	207	127	149	165	123	183	164	132	132	156	145	70	156	203	139	126	104	129	128	164	149	143	180	169
2310001H17Rik	7	0	1	3	11	6	21	3	3	7	6	0	0	3	0	4	0	1	0	3	6	9	1	6
2310001K20Rik	0	0	0	0	0	0	0	0	0	1	0	0	0	0	0	1	0	0	0	0	1	0	0	0
2310001K24Rik	7	5	8	4	8	9	6	13	1	5	16	2	7	5	8	7	13	2	5	7	5	1	5	2
2310002F09Rik	12	29	8	15	20	6	16	1	18	24	25	4	21	19	28	18	23	13	34	26	45	38	25	22
2310002L09Rik	5	0	0	0	0	0	0	1	0	2	0	0	0	0	0	0	0	0	1	0	0	1	0	1
2310003L06Rik	0	0	8	8	1	3	13	0	1	0	0	0	0	0	0	1	0	1	0	2	3	1	0	0
2310005A03Rik	0	0	0	0	0	0	0	0	0	0	0	0	0	3	0	0	0	0	0	0	0	0	0	0
2310005E17Rik	1	0	0	0	1	0	0	0	0	0	0	0	3	1	0	0	0	1	0	0	0	1	0	0
2310007B03Rik	0	2	0	0	0	1	0	0	0	5	0	0	0	0	3	0	0	0	0	1	0	0	0	1
2310008N11Rik	3	7	5	3	0	0	21	6	2	3	2	0	1	2	1	1	0	0	6	0	6	2	1	3
2310009A05Rik	258	173	232	244	178	229	147	202	243	317	241	169	196	217	173	202	164	223	242	219	221	173	235	256
2310009B15Rik	223	216	250	248	172	273	230	193	225	304	246	173	261	228	197	250	231	263	191	270	270	240	253	222
2310010J17Rik	27	27	43	24	28	28	36	28	34	18	42	15	20	36	29	29	11	24	34	42	33	22	33	22
2310011J03Rik	381	590	483	551	560	736	457	468	762	680	519	464	669	615	488	308	666	805	701	525	545	416	499	475
2310014F06Rik	20	20	34	17	27	30	19	6	26	32	24	24	29	19	19	18	28	21	28	24	29	24	19	12
2310015A10Rik	109	126	124	139	91	117	147	118	193	108	117	122	128	131	76	113	143	149	130	137	168	130	155	107
2310015D24Rik	2	0	1	0	1	0	4	0	3	0	0	0	10	0	10	1	0	0	0	0	0	5	0	5
2310015K22Rik	0	0	0	0	1	5	4	0	0	0	2	3	0	0	7	0	1	0	0	0	0	0	0	0
2310016D03Rik	0	0	0	5	0	1	12	0	0	0	0	0	0	1	0	2	0	2	0	0	1	2	0	0
2310016D23Rik	0	0	0	0	0	0	1	0	1	0	0	0	0	0	0	0	0	0	0	0	0	0	0	0
2310016G11Rik	0	2	1	0	0	1	4	1	0	0	0	0	3	2	0	0	0	1	2	1	0	2	0	0
2310020H05Rik	0	0	1	5	1	0	5	0	0	5	0	0	0	0	0	0	0	0	0	0	0	0	1	0
2310022A10Rik	2405	2297	2295	2486	1892	2878	2058	1894	2126	2665	2037	1761	2864	2419	1418	1586	1805	2145	2619	1982	2354	1554	2450	1860
2310022B05Rik	3351	3338	3528	3522	3542	3893	3593	3193	3382	3389	3510	2573	3772	3807	2069	2906	4226	3674	3873	3930	3856	2468	3141	3313
2310026I22Rik	1	1	0	1	2	1	0	2	2	3	5	1	2	0	2	3	2	2	2	2	0	6	8	0
2310026L22Rik	48	40	30	37	38	21	45	24	34	40	21	34	24	28	27	32	29	41	24	42	37	26	34	39
2310030A07Rik	0	0	0	0	0	0	6	0	0	0	0	0	0	0	0	0	0	0	0	1	0	0	0	1
2310030G06Rik	40	49	92	76	49	33	58	55	72	87	68	59	49	109	53	57	45	76	68	55	57	72	74	46
2310031A07Rik	5	1	1	5	2	2	0	2	1	8	2	1	7	3	1	6	1	2	4	4	2	0	8	1
2310033P09Rik	528	414	437	567	523	626	531	565	495	622	515	368	591	564	341	456	571	524	612	812	583	460	481	542
2310034C09Rik	0	0	0	0	1	0	0	0	0	0	0	0	0	0	0	0	0	0	2	0	0	0	0	0
2310034G01Rik	62	40	44	55	19	25	36	31	27	47	40	38	26	43	42	34	22	32	62	35	14	33	28	44
2310034O05Rik	0	0	2	0	0	0	6	0	0	0	0	0	0	1	0	1	0	0	0	0	0	0	0	0
2310035C23Rik	4943	5915	5520	4936	5554	6542	4888	4419	6454	4516	5642	3305	6552	5681	2403	4231	5096	5141	4741	6340	4268	5352	4579	5350
2310036O22Rik	5503	4977	5825	5962	5307	5847	5264	5316	6171	6691	6145	4402	5281	5289	3767	4176	5601	5719	4760	5712	6212	4483	4962	5167
2310039H08Rik	313	193	292	359	214	243	227	242	262	373	253	197	246	208	229	225	137	227	239	277	239	227	199	232
2310039L15Rik	0	1	0	1	1	0	0	0	0	2	1	0	1	0	2	3	0	0	0	1	0	0	0	0
2310040G07Rik	0	2	2	0	1	1	1	2	2	0	0	0	3	2	0	2	0	2	0	0	0	1	0	0
2310040G24Rik	84	60	79	55	46	43	54	56	50	87	92	69	45	58	78	43	54	63	50	53	45	37	73	66
2310043L19Rik	0	0	0	3	0	0	0	0	0	2	0	0	0	0	0	0	0	0	0	1	0	0	0	0
2310043M15Rik	11	11	7	6	15	8	5	9	6	7	13	3	6	11	4	9	8	1	5	16	0	7	3	10
2310043O21Rik	0	0	0	1	0	0	1	1	0	0	0	0	0	0	0	2	0	0	0	1	0	0	0	0
2310043P16Rik	6	4	15	3	9	9	7	21	13	3	13	0	0	11	0	13	8	0	0	6	0	4	0	1
2310044K18Rik	2	0	0	0	0	2	3	0	1	0	5	0	0	1	0	0	0	1	0	3	0	4	0	0
2310046K23Rik	0	1	0	0	0	0	0	0	0	0	0	0	0	0	0	0	0	0	0	0	0	0	0	0
2310047D07Rik	2	5	4	2	3	1	2	9	5	5	5	1	2	3	1	4	1	2	6	4	1	3	0	7
2310050C09Rik	0	0	0	1	0	0	1	0	0	0	0	0	0	0	0	0	0	0	0	0	0	0	0	0
2310057J18Rik	0	0	0	0	0	4	9	0	2	0	2	0	0	3	0	0	1	0	0	0	7	0	0	0
2310057M21Rik	2292	1663	2275	2190	2039	2519	2101	1877	1937	2002	2148	1538	2192	2300	1139	1652	2130	2063	1842	2588	2057	1781	1768	2042
2310057N15Rik	0	0	0	1	0	0	0	0	0	0	0	0	0	0	0	0	0	0	0	0	0	0	0	0
2310058D17Rik	69	51	74	74	99	103	117	81	85	62	98	46	78	107	50	46	68	90	115	104	65	90	90	67
2310061I04Rik	1363	1110	1437	1471	858	1240	1099	851	1220	1272	1261	779	1233	1090	788	912	784	813	972	905	1042	818	1186	809
2310061N02Rik	0	0	0	0	0	0	1	0	0	0	0	0	0	0	0	0	0	0	0	0	0	0	0	0
2310065F04Rik	17	15	15	19	16	26	38	10	13	25	35	11	30	39	9	19	22	33	47	25	32	12	32	26
2310068J16Rik	26	11	21	25	9	14	16	27	20	17	16	6	16	16	10	19	18	11	13	19	18	6	11	13
2310069B03Rik	0	2	0	0	0	0	1	0	0	0	0	1	0	0	1	0	0	0	0	0	0	3	0	1
2310069G16Rik	21	15	19	23	34	28	32	28	27	20	23	11	26	19	19	21	24	33	21	27	48	22	14	16
2310074N15Rik	5	5	13	11	5	5	6	1	11	3	5	1	9	1	5	8	0	5	3	4	6	4	5	6
2310075C17Rik	14	6	7	16	15	8	5	3	1	7	11	1	9	19	14	13	1	6	8	1	7	6	3	4
2310079G19Rik	1	0	0	0	0	1	8	0	3	2	0	0	0	0	0	0	0	0	0	0	5	0	0	0
2310081O03Rik	0	2	3	0	0	0	7	0	0	3	0	2	0	2	0	0	0	1	0	2	0	0	0	0
2410002F23Rik	9219	10262	9390	11942	8862	12485	8541	9301	9569	10324	8941	8224	12422	11060	5128	7387	9252	9885	10790	9837	10072	7289	9629	8816
2410003L11Rik	0	4	3	4	2	0	8	0	2	4	8	0	2	0	0	2	1	0	0	1	0	1	0	2
2410004B18Rik	3335	2700	3541	3234	2975	3667	3445	2789	3052	3954	3457	2403	3654	3624	1903	2576	3150	3733	3092	3597	3407	2840	2823	3422
2410004I01Rik	30	35	47	45	29	23	15	32	24	20	54	17	40	29	31	19	17	29	28	22	13	33	22	24
2410004P03Rik	23	27	17	33	25	15	14	14	25	13	33	12	14	20	17	4	22	1	17	11	11	10	12	2
2410006H16Rik	1515	972	1033	1375	890	1711	1100	1329	1096	2022	1216	894	1308	1080	695	1145	960	1324	1384	1691	1591	1099	1291	1611
2410012E07Rik	0	0	0	2	0	1	3	0	1	0	0	0	0	1	0	0	0	0	0	0	4	0	0	0
2410015M20Rik	795	643	866	802	667	787	841	820	854	935	1043	591	651	652	602	599	729	842	661	856	855	655	708	751
2410016O06Rik	1376	971	1229	1463	838	1853	983	992	933	1549	1017	892	1864	1336	690	1045	1224	1141	1227	1313	1364	900	1288	1208
2410017I17Rik	0	0	0	0	0	0	0	0	0	0	0	0	0	0	0	0	0	0	0	0	0	0	0	0
2410018L13Rik	1239	1079	1535	1201	907	998	1178	926	1129	1060	1499	843	593	733	729	756	463	551	997	893	515	527	997	760
2410021H03Rik	44	26	52	33	26	32	47	15	23	41	73	14	72	59	19	36	39	18	18	51	18	74	14	49
2410022M11Rik	78	58	113	81	48	52	75	85	65	94	41	66	61	54	70	56	39	97	66	89	52	57	99	68
2410024N13Rik	0	0	0	0	0	4	7	0	0	0	2	0	1	0	0	0	0	0	0	1	0	0	0	0
2410080I02Rik	1	0	1	1	4	6	3	0	0	0	0	0	5	0	0	1	2	2	1	2	2	7	2	0
2410089E03Rik	2801	2724	3274	2613	3112	3071	2797	2463	3015	2238	3260	2216	3086	3359	1501	2489	2889	2018	1815	3272	2482	2594	2082	2808
2410124H12Rik	1	4	13	10	10	2	4	2	3	1	4	0	10	9	4	4	3	8	5	4	3	8	12	3
2410131K14Rik	3008	2872	2789	2785	3199	3622	3170	2915	3245	2811	3037	2192	3387	3250	1516	2012	3699	3639	3171	3025	3056	2400	2899	2418
2410137M14Rik	6	5	6	2	3	6	6	1	1	0	11	1	0	0	0	2	2	0	0	2	0	0	0	1
2410141K09Rik	0	0	0	3	4	3	26	0	6	0	6	2	0	4	1	2	0	2	0	0	2	3	3	0
2410152P15Rik	0	0	0	0	0	0	3	0	0	1	0	0	4	0	0	1	0	0	0	0	0	0	2	0
2500002B13Rik	84	134	80	88	119	52	106	59	117	73	113	35	61	78	64	58	60	102	71	83	89	54	97	78
2500004C02Rik	252	216	298	290	192	224	228	189	290	234	293	178	274	238	189	177	156	216	183	254	210	197	203	210
2510002D24Rik	637	499	672	664	480	643	516	488	624	772	678	430	714	615	432	516	457	561	551	615	608	559	675	528
2510009E07Rik	2275	1668	2077	1966	1837	2742	1384	1568	1996	2052	1978	1713	2200	1937	1478	1916	1949	1431	1944	2345	1751	1215	1944	2106
2510016D11Rik	14	6	13	8	12	12	19	15	16	6	7	5	21	11	3	11	7	11	17	10	9	4	6	6
2510017J16Rik	24	10	33	27	26	25	17	13	18	20	28	7	17	33	10	29	36	7	19	42	16	14	10	27
2510039O18Rik	2997	3309	2543	2919	2708	4273	2558	2641	3167	3473	2653	2104	3548	3333	1423	2141	3580	3428	3933	2959	3532	1881	2974	2322
2510046G10Rik	74	59	96	73	50	84	84	65	60	119	82	61	65	61	42	72	40	45	57	61	46	54	66	81
2600006K01Rik	22	7	25	18	10	24	20	9	14	34	18	10	34	24	11	32	19	19	40	32	17	17	28	17
2600014E21Rik	142	50	107	127	165	370	395	241	59	101	97	58	47	66	49	56	114	105	241	307	34	64	50	73
2610001A08Rik	128	131	133	128	237	141	256	155	191	80	214	113	119	166	61	113	131	109	80	142	74	201	65	103
2610001J05Rik	555	658	721	770	694	446	626	592	1298	906	887	697	507	524	446	344	490	552	521	569	516	482	578	477
2610002M06Rik	1517	1541	2003	1532	1381	1318	1193	1114	2003	1511	1945	1147	1798	1623	1094	1159	1397	1351	1135	1410	1620	1345	1115	1339
2610005L07Rik	859	554	730	585	572	942	616	457	525	788	820	419	549	708	232	429	449	530	482	587	456	466	463	433
2610008E11Rik	7713	6910	7784	7734	7464	8805	6595	6893	6687	7331	6712	5669	8413	7526	3040	6732	7664	5646	6711	9330	6456	5184	6117	7740
2610011E03Rik	41	59	48	11	74	51	79	20	30	10	47	25	86	56	17	53	22	14	12	55	27	53	40	47
2610012C04Rik	29	21	24	26	19	13	78	33	24	12	49	15	35	30	15	33	26	16	10	50	20	50	14	32
2610016A17Rik	0	0	0	1	0	0	0	0	3	0	0	0	16	18	28	16	9	20	13	7	21	23	22	15
2610020C07Rik	101	65	65	83	74	36	74	73	64	55	103	44	61	74	39	53	55	33	33	104	59	95	54	51
2610020F03Rik	5	5	5	2	11	3	2	6	3	1	4	5	11	4	3	9	1	1	0	21	0	6	6	7
2610020H08Rik	164	183	214	184	211	212	245	149	195	233	167	107	297	210	110	194	252	203	224	274	249	211	184	214
2610021A01Rik	1644	1591	1789	2003	1474	1973	1343	1749	1631	1658	1612	1396	1827	1702	876	1482	1238	1390	1558	1907	1410	1500	1331	1705
2610024D14Rik	6	5	7	6	7	5	9	7	2	1	7	7	4	12	9	4	9	3	1	13	5	4	5	6
2610027F03Rik	12	4	5	3	11	10	8	7	3	4	0	3	7	2	2	5	10	14	7	6	8	4	3	5
2610027K06Rik	2	2	2	0	3	1	9	1	3	0	6	0	6	8	12	15	9	5	7	11	24	7	7	5
2610028E06Rik	136	145	99	88	302	226	99	200	113	67	50	69	142	99	60	70	497	269	372	400	119	101	108	154
2610028H24Rik	2	7	8	3	0	2	5	7	4	0	3	6	4	0	2	0	2	0	1	1	0	0	2	3
2610034O05Rik	0	0	0	0	1	0	1	0	0	0	0	0	0	0	0	0	1	0	1	0	3	0	0	0
2610035D17Rik	815	558	598	792	644	828	509	664	687	784	642	497	1062	993	618	753	817	756	765	1040	889	787	761	876
2610035F20Rik	5	2	3	0	1	9	5	0	0	3	1	0	13	3	9	1	4	0	7	4	2	9	7	1
2610037D02Rik	121	94	115	84	93	93	82	36	97	87	79	59	84	61	46	76	81	51	27	71	56	98	41	85
2610042L04Rik	176	159	166	225	107	155	96	90	139	207	132	103	138	121	93	165	97	120	126	130	121	113	176	149
2610044O15Rik8	1412	1188	1693	1597	1269	1543	1202	1325	1348	1509	1353	992	1574	1556	761	1104	1032	1183	1271	1506	1170	1078	1089	1274
2610105M22Rik	0	0	0	0	1	0	2	0	0	0	0	0	0	0	0	0	0	0	0	0	0	0	0	0
2610203C20Rik	9251	6987	8245	7485	4814	5821	5207	4279	5840	5801	7564	4434	6671	6545	3157	5123	3164	3026	4081	4758	3778	4483	3906	4794
2610203C22Rik	16	13	6	13	18	12	24	13	6	6	8	7	6	11	7	13	10	7	6	5	8	16	6	6
2610204G07Rik	6	4	3	0	14	4	13	5	9	4	5	3	5	2	1	6	8	0	4	8	8	6	0	5
2610206C17Rik	1	3	4	3	4	10	13	1	9	1	6	4	1	1	1	2	2	2	3	2	4	8	0	2
2610300A13Rik	0	0	0	0	2	1	0	2	0	0	1	0	0	5	0	0	0	0	0	1	0	0	3	0
2610301B20Rik	1237	1136	1132	1183	1388	1472	1210	1188	1271	1310	1070	1005	1282	1338	872	983	1207	1348	1547	1718	1391	1142	1229	1422
2610303G11Rik	1	0	0	1	0	0	3	0	0	0	0	0	0	0	0	0	0	0	0	0	0	3	0	0
2610305D13Rik	43	47	71	55	61	52	78	88	78	64	101	45	86	63	45	43	80	68	57	51	45	41	68	50
2610306M01Rik	290	276	334	355	348	340	316	254	386	438	356	269	325	288	271	252	270	279	310	385	304	207	350	337
2610306O10Rik	0	0	0	0	3	0	3	0	0	0	0	0	0	0	0	0	0	0	0	0	0	1	4	0
2610307P16Rik	1581	1096	1368	1156	1933	2011	1667	1562	1171	1641	1714	1086	2059	1958	942	1740	2689	1711	1964	2861	1832	1648	1483	2153
2610316D01Rik	499	403	423	384	287	430	409	250	467	615	510	363	462	407	265	365	177	349	368	329	346	379	406	443
2610318N02Rik	710	898	813	842	1054	823	982	760	1017	840	952	557	977	854	484	558	1252	1184	840	964	1130	803	727	655
2610507B11Rik	6804	7377	8120	7057	7993	7714	6930	6848	7986	6143	7635	5069	8301	6465	3611	5868	9924	6153	5879	8007	6774	5873	5360	6562
2610507I01Rik	236	197	222	259	184	232	180	229	221	252	239	142	184	180	348	162	173	139	264	189	211	148	387	169
2610509F24Rik	0	0	0	7	2	0	2	1	0	1	3	1	2	0	0	0	0	0	0	0	0	0	0	0
2610524H06Rik	1367	1033	1233	1630	1140	1430	1215	1215	1373	1862	1420	1162	1339	1118	835	1120	1125	1281	1221	1612	1389	1003	1172	1317
2610528A11Rik	5	4	2	1	5	7	17	5	5	9	5	4	7	1	5	2	0	11	3	6	0	5	4	3
2610528J11Rik	0	0	0	0	0	1	0	0	0	3	0	0	0	0	0	0	0	2	0	0	0	0	1	0
2700012I20Rik	15	18	12	13	22	25	17	22	21	15	16	17	20	14	11	12	12	10	15	24	10	13	26	13
2700016F22Rik	5	0	2	0	2	2	14	0	7	8	1	4	5	0	5	0	0	2	5	0	0	0	0	0
2700029L08Rik	15	43	26	25	48	32	25	33	37	7	33	28	39	47	30	53	44	17	24	70	14	33	29	23
2700029M09Rik	2947	2284	2678	2836	2207	2772	2396	2308	2477	3144	3091	1969	2912	2647	1817	2182	1894	2481	2206	2788	2644	2205	2386	2593
2700033N17Rik	102	149	133	113	150	165	155	165	145	156	221	142	144	128	71	101	139	175	126	164	151	121	139	149
2700038G22Rik	137	116	127	142	101	108	109	110	149	117	151	89	131	145	59	67	93	90	95	101	117	100	91	61
2700046A07Rik	0	9	3	1	3	7	23	0	5	3	12	1	25	12	0	2	13	4	11	6	11	8	5	2
2700046G09Rik	90	79	92	88	87	105	94	124	90	100	103	91	99	82	87	67	67	97	79	77	94	56	124	87
2700049A03Rik	1891	1756	2282	2070	2116	2198	2040	1905	1773	1743	2345	1485	2338	2108	1458	1573	2202	1797	1820	2726	2008	1837	1610	2179
2700060E02Rik	4633	4313	4730	4731	4734	4870	4728	4429	5495	5706	5452	3942	4494	4641	3493	3870	4572	5422	4389	5669	5287	4212	4311	4912
2700062C07Rik	1164	965	1050	1262	887	1167	925	936	953	1333	1016	799	1117	1012	617	1021	816	869	1202	1391	1044	822	1168	1138
2700068H02Rik	12	0	10	11	10	4	15	6	6	5	12	4	12	4	0	6	5	8	3	0	4	7	3	4
2700069I18Rik	921	885	888	1138	853	1191	1038	1131	844	1123	945	781	1081	950	509	996	666	958	1118	1181	1178	756	1004	1075
2700078F05Rik	41	59	61	43	90	53	42	46	43	24	41	45	51	62	25	57	43	22	33	100	24	35	34	64
2700080J24Rik	15	7	10	5	7	4	16	10	15	3	16	15	12	24	10	6	2	19	9	4	12	25	2	2
2700081O15Rik	15842	18019	17350	15692	21485	18786	16940	16584	17791	14505	17363	11874	21497	18443	10552	15006	21252	18452	19208	20466	18174	13409	16975	16643
2700089I24Rik	0	0	1	0	0	0	0	2	0	2	0	3	0	0	0	0	0	1	0	1	0	2	0	4
2700094K13Rik	2040	1753	2125	2225	1727	1942	1893	1906	2170	2448	2515	1578	1575	1967	1462	1514	1719	1994	1747	2004	1877	1769	1858	1795
2700097O09Rik	1354	982	1178	1222	935	1246	987	928	1130	1522	1227	789	1457	975	794	990	894	901	1201	1348	1267	914	1004	1150
2700099C18Rik	57	36	44	72	35	37	23	41	39	36	58	25	26	62	32	34	42	60	46	57	42	45	39	52
2810001G20Rik	737	662	856	771	710	630	672	622	867	792	846	544	807	829	557	620	813	922	609	839	988	737	630	729
2810002D19Rik	825	662	775	644	656	681	669	559	853	835	984	571	587	640	468	438	524	659	523	612	662	525	492	582
2810004N23Rik	645	540	556	670	632	730	566	591	678	636	637	458	747	651	446	490	575	591	629	714	707	528	663	587
2810006K23Rik	416	355	353	331	375	441	351	291	471	383	353	296	475	362	366	258	412	434	430	407	413	315	410	315
2810013P06Rik	1417	1024	1353	1329	1004	1395	1187	1081	1267	1584	1339	972	1292	1145	970	1079	938	1158	1117	1267	1180	941	1318	971
2810021J22Rik	2200	1982	1917	2143	1920	2474	1627	1692	1916	2372	1936	1474	2810	2001	872	1845	1866	1805	1905	2703	2233	1667	1955	2285
2810025M15Rik	908	728	842	865	782	713	698	660	804	934	933	566	803	806	573	636	872	933	704	821	850	699	685	751
2810029C07Rik	456	398	496	505	375	450	405	422	507	487	427	327	438	381	253	416	365	345	434	543	421	248	399	449
2810030D12Rik	3	0	1	2	0	0	4	0	0	1	0	0	1	1	6	0	0	0	0	6	1	0	0	0
2810032G03Rik	127	248	196	211	117	76	100	62	168	125	93	65	62	233	66	76	113	160	96	109	95	84	134	60
2810039B14Rik	251	238	281	237	231	236	221	189	288	251	234	193	246	336	232	173	205	228	274	273	308	171	243	202
2810047C21Rik1	0	0	0	3	0	1	0	2	2	1	3	0	0	0	0	0	0	1	0	0	4	1	1	0
2810049E08Rik	20	9	19	18	6	15	15	8	10	12	5	16	14	13	11	13	12	4	4	20	12	13	5	11
2810402E24Rik	208	189	224	266	201	184	179	215	210	200	224	182	189	222	150	133	147	192	189	232	134	172	167	167
2810403A07Rik	13711	12315	14741	13445	14097	16416	15135	12373	12355	14000	14614	9193	17389	17437	5892	10262	16860	14854	12375	15641	14422	12972	9515	11950
2810403D21Rik	39	42	36	62	43	45	104	48	48	44	40	24	37	42	42	30	52	56	35	43	41	51	31	67
2810404F17Rik	0	1	0	0	0	0	0	0	0	0	0	1	0	0	0	0	0	0	0	0	0	1	0	2
2810404M03Rik	3	1	3	1	2	1	6	2	1	3	2	0	3	6	0	1	3	0	1	2	2	1	0	0
2810405F15Rik	2	5	5	2	4	9	5	5	8	12	9	5	6	1	1	2	6	5	3	6	15	4	2	5
2810405F17Rik	31	20	35	27	23	23	17	23	42	44	28	13	37	26	7	31	9	35	33	25	16	29	16	20
2810407A14Rik	8	2	5	11	16	20	20	13	9	5	8	9	15	8	18	4	14	13	14	24	11	13	4	3
2810408A11Rik	597	530	623	540	583	707	591	563	598	759	568	417	668	584	319	507	494	703	677	759	506	464	533	593
2810408I11Rik	8	11	14	10	12	24	14	25	20	26	9	6	16	9	29	13	13	13	6	26	19	24	16	17
2810410L24Rik	787	911	703	1103	1128	1245	954	1184	998	850	878	803	869	835	603	766	1011	1002	1256	1160	923	586	964	808
2810414N06Rik	37	52	51	41	35	26	41	47	50	48	32	43	46	40	39	25	27	46	18	44	24	32	44	18
2810417H13Rik	88	52	27	46	83	128	53	67	86	63	67	45	45	69	216	24	97	63	175	97	40	70	36	39
2810425M01Rik	4	2	5	0	7	7	1	1	5	4	0	0	13	3	2	0	5	1	2	5	1	4	1	3
2810428I15Rik	1651	1347	1723	1885	1481	1740	1259	1342	1815	1958	1720	1104	1483	1535	1212	1405	1366	1583	1418	1529	1722	1332	1558	1411
2810428J06Rik	45	16	48	33	38	60	27	31	26	16	61	21	70	41	8	40	37	12	25	42	19	52	7	28
2810429I04Rik	120	52	128	84	53	49	64	38	82	82	94	67	76	73	44	43	34	50	37	36	45	76	36	31
2810430I11Rik	0	0	1	0	1	0	0	0	0	1	0	2	0	0	0	0	0	5	3	0	2	1	0	0
2810432F15Rik	9	12	10	0	10	19	13	6	7	16	7	4	3	9	6	3	4	4	3	7	5	4	11	8
2810433D01Rik	1	1	0	0	2	3	2	0	0	0	0	0	0	2	0	0	1	0	1	1	0	0	0	0
2810442N19Rik	8	13	8	7	5	9	18	11	6	5	9	20	10	5	8	7	6	3	7	10	4	7	9	5
2810454H06Rik	83	70	95	87	70	71	94	56	65	113	76	75	130	98	36	79	45	66	90	96	105	76	53	61
2810455O05Rik	105	56	81	96	71	72	52	65	91	85	73	56	73	95	31	54	76	54	76	71	90	71	69	80
2810459M11Rik	95	40	53	67	23	36	45	15	26	77	17	7	89	101	35	94	54	75	58	54	54	44	76	105
2810468N07Rik	9	16	19	14	26	20	15	11	21	26	20	5	53	61	32	22	50	60	39	53	66	43	60	25
2810471M01Rik	11	9	10	32	37	11	25	22	29	17	12	19	18	3	5	18	47	28	15	38	56	9	17	23
2810474O19Rik	3498	2464	3005	2834	2934	3268	3044	2823	2595	2910	3138	2223	2786	2979	1786	2722	2742	2826	2843	3960	2966	2494	2584	3471
2900002M20Rik	6	1	3	1	5	2	2	1	7	5	4	1	4	6	4	3	2	3	2	2	2	1	2	6
2900005J15Rik	20	13	19	11	10	7	14	13	8	6	10	9	27	41	8	20	22	18	16	20	51	40	16	15
2900009J06Rik	0	1	2	2	2	1	5	3	3	1	2	6	6	8	6	2	5	7	9	6	3	1	0	0
2900011O08Rik	7146	6397	8556	7498	5701	5508	5758	5142	7737	7375	8595	5363	5823	5856	3619	4513	4239	5176	4421	5007	5728	4584	5296	4601
2900018N21Rik	76	112	118	74	182	98	143	92	100	61	113	45	135	113	18	80	127	92	57	202	102	174	57	140
2900022M07Rik	101	58	82	58	54	72	63	41	38	49	78	44	42	57	21	32	32	24	34	73	43	86	33	79
2900026A02Rik	98	108	105	93	108	102	45	37	197	92	57	68	71	118	36	44	82	74	40	51	49	61	40	47
2900027M19Rik	47	122	94	64	145	62	107	54	134	35	88	56	110	63	38	56	39	30	32	59	64	78	45	89
2900035J10Rik	3	1	7	2	2	4	5	2	1	2	0	4	12	4	0	0	3	0	1	1	1	1	0	3
2900037B21Rik	53	19	32	22	31	38	43	22	24	17	37	14	31	29	15	23	20	19	20	32	17	33	19	36
2900041M22Rik	6	23	11	2	23	5	22	16	27	14	7	0	2	11	3	1	12	7	8	7	11	5	3	5
2900042K21Rik	2	1	2	9	2	2	4	0	0	0	0	0	11	5	2	1	5	2	4	7	0	1	5	3
2900052L18Rik	249	273	183	266	358	393	336	252	193	247	255	161	313	247	176	328	357	178	408	453	285	250	270	312
2900052N01Rik	12	60	12	32	5	11	13	5	2	3	2	5	5	2	0	3	0	0	9	0	1	0	2	1
2900055J20Rik	124	104	148	91	36	100	114	44	77	77	145	55	102	93	48	56	36	86	49	86	56	79	74	67
2900060B14Rik	9	24	12	13	39	10	22	12	20	17	16	14	19	20	7	11	18	8	16	39	17	13	7	17
2900064F13Rik	27	36	33	17	14	12	6	3	22	19	23	9	9	24	17	14	12	17	30	23	12	4	6	22
2900064K03Rik	1	3	11	1	2	0	3	4	1	1	0	0	0	5	1	0	0	0	0	0	0	5	0	1
2900069G24Rik	0	0	0	0	0	0	1	0	0	0	0	0	0	0	0	0	0	0	0	0	0	0	1	0
2900072N19Rik	26	28	43	23	16	16	19	9	38	27	29	10	41	35	23	19	10	26	22	24	22	24	30	16
2900076A07Rik	206	174	260	169	133	132	174	99	218	225	244	127	161	171	96	128	125	152	137	126	166	211	114	133
2900076G11Rik	3	1	5	3	1	0	5	1	1	2	1	3	3	0	2	5	4	0	2	4	1	6	0	0
2900079G21Rik	165	172	212	170	65	77	98	71	131	157	124	88	188	200	113	149	65	110	93	83	82	97	118	83
2900089D17Rik	11	16	14	17	18	12	24	11	13	23	25	9	19	6	6	11	14	18	13	14	20	15	15	4
2900092C05Rik	5	1	3	2	0	4	2	1	0	0	3	1	0	1	0	2	1	0	0	1	3	3	2	0
2900092N22Rik	3	1	7	1	8	1	17	2	6	5	1	10	12	9	13	11	2	0	2	8	7	4	4	9
2900092O11Rik	1	1	0	2	0	0	2	0	1	0	0	0	0	1	4	3	0	0	2	0	0	2	0	1
2900093K20Rik	121	58	84	101	73	112	64	68	100	139	106	53	74	60	73	71	68	63	72	82	112	85	69	77
2900097C17Rik	634	1006	898	726	1108	746	661	693	1154	519	829	553	649	748	328	359	1044	816	495	533	568	670	600	398
3000002C10Rik	105	135	173	209	200	126	174	185	209	117	172	163	123	88	137	106	109	66	145	84	81	64	158	102
3010001F23Rik	173	168	246	232	157	245	188	161	204	237	251	162	171	180	150	164	178	157	190	211	237	187	196	204
3010003L21Rik	291	238	226	245	324	293	271	307	258	245	327	213	235	291	177	246	274	273	277	325	319	192	223	255
3010026O09Rik	268	203	235	307	183	307	215	219	266	272	263	254	228	223	148	220	220	227	226	297	233	178	233	273
3100002H09Rik	25	28	22	20	16	24	28	8	16	16	28	3	48	48	20	20	7	15	5	12	5	30	3	15
3100003L05Rik	3	0	0	0	0	4	12	0	0	0	0	0	0	0	1	0	0	0	0	3	1	0	0	0
3110001I22Rik	589	550	530	638	702	913	789	829	590	710	630	426	813	786	336	565	902	844	849	1066	975	683	648	817
3110002H16Rik	2765	2459	2902	2904	2503	2991	2357	2100	3057	3042	3162	2285	3556	3105	1691	2306	2656	2459	2243	3095	2922	2319	2352	2828
3110004A20Rik	0	0	0	0	0	1	0	0	0	0	0	0	0	0	0	0	0	0	0	0	0	0	0	0
3110009E18Rik	137	90	174	124	82	98	155	105	125	161	179	90	161	134	115	141	101	168	129	183	198	165	149	147
3110018I06Rik	0	0	0	1	0	0	1	0	0	0	0	0	0	0	0	0	0	1	0	1	0	0	0	0
3110021N24Rik	27	16	15	25	34	19	20	17	15	19	21	12	20	40	9	15	18	9	8	30	19	34	9	21
3110031N09Rik	1	0	1	1	2	5	0	1	1	2	0	1	1	1	2	1	0	0	0	1	5	1	0	0
3110035E14Rik	3744	2648	3705	3345	2621	3863	3612	3041	2023	3438	3113	2740	4425	4149	3452	3613	3971	4122	3683	4905	4211	3413	3569	4231
3110039M20Rik	0	0	1	0	3	0	1	0	0	1	0	0	0	0	0	2	0	0	0	0	0	0	0	0
3110040N11Rik	570	425	604	624	478	483	479	463	514	556	560	444	493	569	404	470	394	510	507	566	454	430	453	473
3110043O21Rik	2321	2596	2919	2764	2258	2603	2399	2460	2946	2764	2934	2087	3282	2870	1954	2426	2327	2582	2204	2844	2557	2397	2651	3033
3110045C21Rik	80	102	91	74	135	98	139	95	152	117	121	87	125	88	96	69	135	116	100	129	126	89	137	100
3110052M02Rik	1541	1145	1172	1140	1283	1736	972	904	1241	1689	1136	779	1477	1467	611	1006	1038	1127	965	1428	1075	1022	919	1204
3110053B16Rik	272	151	268	285	145	174	217	123	210	215	232	134	95	152	159	152	104	95	181	189	114	89	177	137
3110056K07Rik	200	173	183	208	208	286	255	204	175	217	256	176	189	173	100	177	169	148	179	263	163	201	160	195
3110062G12Rik	8	6	8	22	6	1	14	6	6	1	5	7	8	1	0	5	3	0	11	12	5	9	7	17
3110062M04Rik	145	131	144	151	118	185	103	120	176	117	144	129	153	98	84	100	134	146	129	149	165	103	129	107
3110067C02Rik	4	2	3	10	4	1	0	0	5	1	5	0	2	2	2	3	3	4	3	2	0	3	0	3
3110070M22Rik	27	18	35	21	21	13	60	16	10	35	38	4	14	28	13	13	13	22	41	38	15	20	15	17
3110079O15Rik	0	0	7	0	2	0	2	0	1	2	3	0	0	0	1	1	0	0	0	0	0	2	0	2
3110080O07Rik	50	56	80	60	117	52	93	69	57	40	126	47	83	80	36	75	56	56	43	112	77	82	40	94
3110082I17Rik	264	187	254	276	225	257	205	148	250	215	217	177	232	165	160	225	291	168	268	283	187	148	194	181
3110082J24Rik	14	9	11	14	11	28	11	8	2	26	21	5	19	40	22	25	24	25	20	29	20	14	22	27
3110083C13Rik	97	67	114	63	54	68	61	63	104	124	122	53	80	90	81	85	55	98	73	81	104	74	106	47
3110099E03Rik	0	2	4	0	1	4	14	5	5	0	6	0	2	0	2	0	2	0	1	4	0	1	2	4
3222401L13Rik	63	62	124	104	132	92	92	175	108	107	77	94	86	80	89	59	91	80	134	118	53	107	104	107
3300002A11Rik	1	2	3	9	2	7	2	2	2	0	3	3	7	5	0	3	7	1	3	3	3	0	1	3
3300002I08Rik	167	120	160	154	178	174	145	153	179	131	164	118	146	143	55	130	183	89	123	196	129	143	106	180
3300002P13Rik	19	21	34	21	9	2	35	17	17	14	44	25	20	15	11	17	5	6	15	12	11	23	14	14
3300005D01Rik	1	0	0	0	0	0	0	0	0	8	2	0	0	0	0	1	0	0	0	0	0	0	0	1
3425401B19Rik	0	2	2	12	1	7	5	0	0	0	1	0	0	3	0	0	4	0	0	2	1	1	0	1
3632451O06Rik	2174	2651	2186	2707	2863	2686	2339	2709	3363	2607	2556	2478	2264	2183	1239	1692	2316	2674	2627	2628	2837	2016	2578	2466
3632454L22Rik	74	90	82	74	46	42	61	38	64	33	70	62	36	28	22	36	14	30	12	26	43	36	77	35
3830403N18Rik	0	0	2	0	2	0	4	0	1	4	0	2	0	0	2	0	0	1	1	1	0	0	0	3
3830406C13Rik	419	418	587	569	395	322	406	367	585	491	644	413	333	424	263	297	424	437	272	398	447	412	382	303
3830408C21Rik	34	22	42	28	32	28	34	31	30	49	27	36	15	20	20	35	19	10	27	30	32	29	32	34
3830417A13Rik	0	0	0	0	0	5	11	0	1	0	0	0	0	1	0	1	0	0	0	5	0	0	0	0
3830422I06Rik	0	3	0	0	4	0	1	0	0	2	0	2	0	0	0	0	0	0	0	0	0	2	0	0
3830432H09Rik	7	8	9	7	6	14	33	18	17	3	8	1	12	16	0	8	10	6	0	10	16	27	20	6
3930402G23Rik	10	2	5	1	10	0	19	1	3	4	6	0	1	2	0	1	8	1	12	3	1	0	3	0
4430402I18Rik	32	29	38	36	10	25	22	5	33	46	30	9	38	23	7	16	32	23	10	21	23	39	29	9
4631405J19Rik	6	9	4	4	13	4	9	3	4	5	2	4	7	5	0	4	4	2	1	4	3	6	4	2
4631405K08Rik	1	2	0	0	5	2	5	0	2	6	1	0	7	3	2	1	1	1	0	1	0	1	1	0
4632404H12Rik	293	232	307	337	275	252	253	242	289	267	283	181	239	220	193	176	212	206	210	274	226	228	199	226
4632404M16Rik	4	1	0	7	3	0	1	0	0	0	1	0	1	0	0	0	2	0	0	0	0	3	0	1
4632411P08Rik	4	7	16	17	8	14	16	20	3	7	9	9	13	7	8	11	8	8	8	8	16	12	7	12
4632415L05Rik	1340	1004	1137	1226	1235	1517	1017	1052	1112	1238	1137	806	1246	1176	679	1056	1123	988	1093	1314	1076	858	1159	1049
4632427E13Rik	2239	1915	1978	1588	2729	2625	3165	1803	1726	1895	2771	1063	3724	2948	1164	1974	3291	1655	1824	3754	2278	3577	1330	2791
4632428C04Rik	4	5	15	1	1	6	4	0	5	6	2	0	1	6	15	1	4	11	7	2	0	4	0	0
4632432E15Rik	0	1	2	1	0	6	4	0	0	0	0	0	0	1	0	1	1	0	1	0	0	7	0	1
4633401B06Rik	13	12	17	11	5	9	16	6	5	5	8	6	31	11	18	14	9	3	8	25	8	14	12	25
4731419I09Rik	7	10	2	8	5	7	7	4	3	11	4	2	8	4	5	4	9	4	6	13	5	9	4	11
4732414G09Rik	10	15	5	7	1	9	5	23	12	10	14	1	5	15	0	4	1	1	1	5	9	8	8	8
4732416N19Rik	50	30	43	22	48	55	65	39	54	67	28	28	23	40	35	24	36	56	52	47	42	25	15	37
4732419C18Rik	0	1	1	0	3	4	5	1	0	3	0	3	0	0	0	1	0	1	0	1	0	4	0	1
4732440D04Rik	140	78	98	70	64	111	100	45	91	72	75	43	47	61	58	67	80	62	98	81	51	66	49	72
4732463B04Rik	69	34	52	32	35	26	47	13	26	46	40	32	40	88	43	26	61	51	51	48	65	47	85	30
4732465J04Rik	0	2	0	1	0	1	5	2	0	1	1	2	0	0	4	1	0	0	0	1	4	0	0	2
4732471J01Rik	136	127	130	156	98	110	97	72	162	88	122	101	102	115	86	97	72	86	90	111	80	73	59	69
4732487G21Rik	204	121	181	177	169	238	157	143	170	151	181	126	238	178	97	138	159	104	180	206	131	115	164	178
4732490B19Rik	1	6	4	8	13	19	8	14	3	3	8	2	0	12	1	2	4	4	1	3	3	0	0	13
4732491K20Rik	244	208	254	231	188	216	178	182	237	222	220	176	244	164	116	189	136	224	154	237	225	154	193	235
4732496C06Rik	404	208	146	174	235	278	149	118	222	215	137	105	197	203	166	243	99	160	194	365	108	104	150	300
4831440E17Rik	20	17	7	10	16	30	25	5	10	20	7	0	27	5	14	6	13	5	7	23	14	4	5	7
4833403J16Rik	0	0	0	0	0	0	0	0	0	0	0	0	0	0	0	0	0	0	0	0	0	0	0	0
4833404L02Rik	0	0	1	0	0	0	0	0	1	1	0	0	5	0	0	0	0	0	0	0	0	0	3	0
4833407H14Rik	0	1	0	7	2	1	2	0	0	8	0	3	0	1	0	1	1	0	0	0	0	0	4	1
4833411C07Rik	4	0	2	3	4	3	25	7	0	1	0	0	1	0	0	1	4	0	2	1	0	7	7	0
4833412C05Rik	0	0	0	0	1	0	7	2	1	2	0	0	0	3	0	0	0	0	0	0	2	8	4	1
4833412K13Rik	48	10	22	7	27	22	27	13	14	17	22	4	42	23	4	12	17	4	6	14	4	7	7	10
4833413E03Rik	0	0	0	0	4	0	4	0	2	0	1	0	0	0	0	0	1	0	0	0	0	0	0	0
4833413G10Rik	23	11	15	20	12	17	17	22	21	11	8	8	31	3	7	10	12	15	18	11	20	12	21	25
4833417C18Rik	8	10	1	1	2	3	5	5	3	8	2	3	2	15	9	8	5	1	2	5	2	1	2	2
4833418N02Rik	88	53	72	48	82	61	96	41	80	88	60	42	85	106	30	77	49	108	105	66	66	45	102	73
4833418N17Rik	1	0	0	0	0	0	0	0	0	2	0	0	0	0	0	0	0	0	0	0	0	1	0	2
4833420G17Rik	4922	4118	5320	4651	5041	6039	5747	4522	4854	4948	6309	3371	6269	5930	2910	4667	5862	5513	5056	6558	5758	5020	4056	5680
4833421G17Rik	2	6	1	3	1	8	13	6	1	5	3	1	3	0	2	2	9	3	6	10	2	0	0	4
4833421K07Rik	2	0	2	0	2	1	3	0	4	4	5	0	0	2	0	0	1	6	5	8	0	4	0	2
4833422C13Rik	50	31	73	47	30	24	38	34	50	52	62	21	37	44	39	25	31	27	22	34	37	29	24	51
4833422M21Rik	29	17	29	1	13	5	26	9	13	25	22	7	14	17	15	8	17	11	9	15	12	14	8	16
4833423E24Rik	0	5	6	0	4	1	5	0	1	7	3	8	0	0	1	0	0	0	0	2	0	0	6	0
4833427F10Rik	0	0	0	2	1	0	6	0	0	4	0	0	1	1	0	0	0	0	0	0	2	2	0	0
4833427G06Rik	0	0	1	2	0	0	1	1	3	0	0	0	0	0	0	0	2	0	0	0	0	0	0	0
4833428L15Rik	0	0	2	3	0	2	4	0	0	0	0	1	0	0	1	1	0	5	0	0	0	3	0	0
4833439L19Rik	13087	14606	15109	14248	17034	17150	14616	13562	16982	14285	16593	11090	16377	14428	8856	11274	18696	16965	16414	18701	17684	12425	13992	14522
4833445I07Rik	55	67	82	81	39	62	35	51	56	60	68	65	73	80	34	39	38	57	71	43	35	34	47	47
4921501E09Rik	0	2	0	1	0	0	3	1	0	1	0	0	0	1	0	0	0	0	3	0	1	8	0	0
4921504A21Rik	22	32	26	35	29	26	48	9	23	30	32	5	41	28	26	12	18	27	16	17	24	26	11	27
4921504E06Rik	0	0	2	2	2	7	14	0	0	1	2	1	0	0	0	1	1	1	0	0	0	8	0	0
4921507G05Rik	4	6	0	0	4	0	2	1	4	4	2	4	4	0	0	0	3	2	2	3	6	3	1	2
4921507P07Rik	138	121	176	89	113	171	172	138	135	113	157	98	114	161	131	118	94	124	143	114	136	122	131	138
4921508D12Rik	0	1	0	0	2	2	18	0	0	0	1	0	0	2	0	0	0	0	0	0	0	0	3	0
4921508M14Rik	0	0	1	1	0	0	12	0	0	3	1	1	1	0	0	0	1	0	0	0	0	0	0	4
4921509A06Rik	0	0	0	0	1	2	2	0	0	0	0	0	0	0	0	0	0	0	0	0	0	0	0	2
4921509C19Rik	0	0	1	1	2	0	4	1	0	0	1	0	0	1	0	0	0	0	1	0	0	0	0	0
4921511C10Rik	67	49	47	77	92	85	99	67	75	26	82	23	79	113	46	40	39	19	68	112	46	85	32	61
4921511C20Rik	0	0	3	0	0	0	0	0	0	0	0	0	0	0	0	0	0	0	3	0	0	0	1	0
4921511E07Rik	0	0	2	0	0	0	0	1	0	1	0	0	0	0	0	0	0	0	0	0	0	0	0	0
4921511H03Rik	15	6	15	4	10	15	15	6	21	11	13	6	5	11	7	6	9	5	4	9	3	12	5	13
4921511M17Rik	0	0	0	0	0	0	0	0	0	0	0	0	0	0	0	0	0	0	0	0	0	0	0	0
4921513D11Rik	25	11	11	12	16	5	19	3	10	14	13	8	5	22	8	10	13	25	7	14	26	14	4	9
4921513I03Rik	1	0	0	0	0	1	0	0	5	0	1	0	0	4	0	1	1	1	0	0	0	0	1	0
4921513I08Rik	0	2	0	1	0	0	6	2	0	0	1	0	0	0	2	4	0	0	0	1	0	0	0	0
4921514A10Rik	0	1	0	0	3	3	4	1	3	0	1	0	6	5	3	3	5	4	0	0	5	0	2	5
4921515E04Rik	0	0	0	0	0	0	2	0	0	0	2	0	0	0	0	0	1	0	0	0	0	1	2	0
4921517D22Rik	2	2	0	1	1	1	4	2	1	0	1	0	2	0	0	1	0	2	2	1	0	1	1	1
4921518K17Rik	0	0	0	0	0	2	3	0	0	1	0	0	1	1	1	0	0	0	0	0	0	1	0	2
4921521D15Rik	0	0	0	4	0	0	2	1	0	0	0	5	0	0	0	0	0	0	0	0	0	0	1	0
4921522P10Rik	21	25	11	18	20	14	21	38	18	15	16	9	23	11	8	18	14	13	7	16	49	9	2	28
4921523L03Rik	1	0	0	1	0	1	5	1	0	0	1	0	0	0	0	1	0	0	0	0	0	1	0	0
4921524J17Rik	2078	1784	2328	2068	2081	2140	1979	2022	2044	2258	2533	1617	1834	2066	1093	1524	1872	2145	1915	2634	2103	1975	1826	2426
4921524L21Rik	0	0	0	0	1	1	4	1	2	2	0	0	0	0	1	1	0	0	0	0	1	0	3	0
4921527H02Rik	3	4	1	1	5	6	18	1	0	2	1	4	0	0	2	2	0	2	2	0	0	2	0	0
4921528I07Rik	0	1	1	2	2	0	8	0	0	5	2	0	0	3	0	2	0	0	0	0	0	2	0	0
4921529L05Rik	5	10	3	4	6	15	25	15	1	4	0	0	0	5	0	0	1	9	16	21	0	17	1	16
4921530L21Rik	0	0	0	0	0	0	0	0	0	9	0	0	0	0	0	0	0	0	0	0	0	0	0	0
4921531C22Rik	210	168	231	221	205	253	215	170	177	164	223	152	230	188	218	201	247	184	230	331	192	158	172	177
4921534H16Rik	84	205	140	61	273	82	130	124	152	67	156	51	143	168	53	86	99	68	17	129	47	138	49	99
4921536K21Rik	30	40	29	21	30	32	49	35	30	21	27	9	25	28	20	25	36	44	38	35	35	24	8	16
4921539E11Rik	1	4	1	0	1	0	8	3	0	3	1	2	0	1	0	0	2	0	0	0	1	5	0	0
4921539H07Rik	0	0	2	2	0	0	3	0	0	1	1	3	1	1	0	1	0	0	0	1	0	0	0	0
4922502D21Rik	0	3	1	0	0	6	6	3	1	2	2	8	0	0	0	0	0	0	0	0	3	2	2	2
4922502N22Rik	1	0	2	0	1	0	11	2	0	0	0	0	0	0	0	0	3	0	0	0	0	2	0	1
4930401G09Rik	0	0	1	0	1	0	0	0	0	1	0	0	0	0	0	0	0	0	0	0	1	0	2	0
4930401O10Rik	0	0	0	0	0	0	0	0	0	0	0	0	0	0	0	0	0	0	0	0	0	0	0	0
4930401O12Rik	0	1	1	0	0	0	6	0	0	2	1	0	0	0	0	0	0	0	0	0	0	2	0	0
4930402C01Rik	0	2	2	0	0	0	5	0	0	0	0	0	0	0	0	0	0	0	0	0	0	2	0	0
4930402F06Rik	0	0	0	0	0	0	2	0	0	0	0	0	0	0	2	0	0	0	0	0	0	1	0	0
4930402F11Rik	9	6	2	1	2	1	7	1	5	1	0	0	0	0	2	0	0	0	0	0	0	0	0	3
4930402H05Rik	0	1	2	0	5	0	3	3	0	0	5	1	1	0	0	0	0	0	0	1	0	0	0	1
4930402H24Rik	15453	16670	18154	16594	18609	17414	16495	15539	18697	14225	18306	12369	18126	15229	8318	12881	18635	14363	13868	17888	15774	12579	12655	14701
4930402K13Rik	2	0	1	0	0	0	15	0	0	0	0	0	0	0	0	0	0	4	0	0	3	0	0	0
4930403D09Rik	0	2	2	0	0	0	1	0	0	0	0	0	0	0	1	0	0	1	0	0	1	1	0	0
4930403O15Rik	0	3	0	0	2	1	3	0	0	0	0	0	1	1	0	0	0	0	0	0	0	0	0	0
4930403P22Rik	30	26	25	27	22	27	24	16	14	23	46	31	26	31	12	17	12	1	6	31	2	38	13	19
4930404A12Rik	0	0	0	1	0	1	0	0	0	0	0	0	2	0	0	0	0	0	0	0	0	0	0	0
4930404H24Rik	0	4	0	0	0	1	0	0	0	0	1	0	1	0	1	1	0	0	0	0	0	0	0	0
4930404I05Rik	21	10	37	12	13	30	28	18	10	17	24	9	24	30	7	21	25	8	20	30	10	14	8	13
4930404N11Rik	14	6	7	9	10	11	9	7	3	8	3	9	16	8	4	8	10	16	9	2	7	7	5	12
4930405A21Rik	24	15	27	26	14	16	15	29	36	23	17	22	35	14	8	19	18	18	9	18	25	17	14	11
4930405D11Rik	0	0	0	6	1	0	9	3	1	3	1	0	0	1	0	0	0	1	0	0	1	2	0	0
4930405G09Rik	0	0	0	1	0	0	0	0	0	0	0	0	0	0	0	0	0	0	0	0	1	1	0	0
4930405H06Rik	1	4	3	2	2	1	5	0	3	1	13	2	0	6	0	5	2	0	0	2	3	8	7	0
4930405L22Rik	0	1	2	0	0	0	5	0	0	0	1	0	0	0	0	0	0	0	0	0	0	0	0	0
4930405N21Rik	4	5	3	0	0	10	0	0	0	6	2	0	0	0	1	0	1	0	1	0	5	4	0	0
4930405O22Rik	2	13	4	5	8	6	10	13	12	10	10	5	4	14	6	5	7	9	0	20	12	9	2	7
4930406D18Rik	0	0	0	1	0	1	2	0	0	0	0	0	0	0	0	1	0	0	0	0	0	0	0	0
4930407G08Rik	0	0	1	2	3	0	2	0	0	0	1	0	0	0	0	0	0	0	0	0	0	0	0	0
4930407I10Rik	2	0	0	0	1	3	17	1	0	3	2	0	0	0	0	1	3	1	0	0	0	4	0	2
4930408K08Rik	0	0	0	0	0	2	3	0	0	0	0	0	0	0	0	0	0	0	0	0	1	0	0	0
4930408O17Rik	4	0	4	2	0	0	0	0	2	1	0	0	0	0	1	0	0	0	0	2	0	0	0	0
4930412B13Rik	0	1	0	0	0	2	0	5	0	1	0	0	0	0	0	0	0	0	0	0	0	3	1	0
4930412C18Rik	20	27	47	16	34	9	45	13	32	14	29	9	16	26	8	15	25	8	37	16	44	32	18	6
4930412E21Rik	0	0	0	1	0	0	3	0	1	1	0	1	0	0	0	0	0	0	0	0	0	1	0	1
4930412F09Rik	3	1	2	0	0	2	13	2	0	0	0	0	0	0	1	1	0	0	0	0	3	3	1	0
4930412L05Rik	6	0	2	3	1	0	3	4	1	1	0	1	3	2	2	3	2	7	11	4	0	0	0	1
4930412M03Rik	15	11	8	10	15	4	13	19	15	3	8	4	19	13	2	6	19	7	8	8	11	16	5	7
4930412O13Rik	0	0	0	0	0	2	2	0	0	0	2	0	67	38	28	36	25	30	8	14	38	30	12	21
4930413E15Rik	2	1	0	1	4	1	17	0	1	7	3	0	0	0	0	0	0	0	0	0	7	4	0	0
4930413G21Rik	99	69	84	91	105	123	90	105	74	97	84	57	83	71	72	80	80	98	102	124	81	63	99	80
4930415F15Rik	9	9	7	33	96	11	39	53	40	9	40	34	13	15	1	7	142	67	43	34	116	26	27	26
4930415H17Rik	0	0	0	0	0	0	0	0	0	0	0	0	0	0	0	0	0	0	0	0	0	0	0	0
4930415L06Rik	0	0	11	2	6	9	27	1	0	0	8	5	0	0	0	0	0	2	0	3	0	4	0	0
4930415O20Rik	10	9	12	10	3	6	4	14	11	7	1	0	1	2	2	5	3	4	1	4	9	7	2	5
4930417H01Rik	7	2	10	7	2	5	19	1	5	8	10	1	2	1	7	3	3	0	1	5	1	2	2	0
4930417O13Rik	3	2	1	2	0	0	3	1	1	1	1	3	0	0	2	0	0	0	3	2	0	1	1	5
4930417O22Rik	0	4	0	0	0	1	3	0	0	0	0	0	0	1	0	0	0	0	0	1	0	2	0	0
4930419G24Rik	15	5	9	2	8	12	14	6	8	4	6	5	6	3	0	2	0	3	4	12	6	8	5	2
4930420N18Rik	2	0	1	5	1	0	1	1	2	0	2	0	0	2	0	2	0	1	3	0	0	3	0	1
4930421C12Rik	0	0	0	0	0	1	6	1	0	0	2	0	0	0	0	0	0	0	0	1	0	0	0	0
4930421P07Rik	0	1	0	0	0	0	4	0	0	0	0	0	0	2	0	0	0	0	0	0	0	0	0	0
4930422M22Rik	41	37	67	47	46	24	62	25	36	31	79	42	48	50	20	25	39	32	12	44	33	43	20	36
4930423C22Rik	1	0	0	0	0	0	0	0	0	0	0	0	0	1	0	0	0	0	0	0	0	1	0	0
4930423M02Rik	2	1	0	0	1	1	4	0	0	0	2	0	0	0	0	2	0	0	0	0	0	0	0	0
4930425K10Rik	0	0	3	0	0	0	0	0	0	0	1	0	0	0	0	0	0	0	0	0	0	0	0	2
4930425L21Rik	0	0	4	5	1	0	9	1	0	0	4	0	0	0	0	0	0	0	0	0	0	2	0	1
4930425O10Rik	0	0	0	0	0	0	1	1	0	2	0	0	1	0	0	0	0	0	1	0	0	0	0	2
4930426D05Rik	50	43	47	48	32	52	34	25	29	35	48	26	19	28	28	56	33	43	52	28	22	15	30	28
4930426I24Rik	0	1	2	0	2	0	1	0	0	3	4	1	1	1	4	2	0	2	7	1	5	1	2	5
4930426L09Rik	6	12	0	5	4	6	1	5	6	4	3	2	3	1	2	5	6	4	9	13	9	5	13	9
4930427A07Rik	488	674	626	587	554	592	497	474	729	523	486	610	690	603	352	367	659	549	573	421	610	311	624	393
4930428N03Rik	0	3	0	0	0	1	0	0	0	0	0	0	0	0	0	0	0	0	2	0	0	0	0	0
4930428O21Rik	2	2	0	0	2	4	17	0	0	0	0	2	0	1	0	2	0	1	2	3	0	5	3	0
4930429D17Rik	1	0	0	0	2	2	4	0	0	0	0	0	0	0	0	1	0	0	0	1	0	1	0	0
4930429F24Rik	15	6	8	13	2	17	6	12	5	24	16	5	7	1	0	1	9	3	2	17	3	13	2	3
4930429H19Rik	3	0	5	4	2	0	5	4	3	9	1	2	0	1	4	0	5	0	2	3	0	8	5	5
4930429P21Rik	0	0	0	0	0	1	1	0	0	0	0	0	0	0	0	0	0	1	0	0	2	0	0	0
4930430A15Rik	1	3	3	4	1	0	26	1	2	2	1	0	0	0	1	1	2	0	0	9	0	1	1	2
4930430E12Rik	8	1	1	0	0	1	3	0	0	1	1	5	0	0	0	2	0	2	0	2	1	4	0	2
4930430F08Rik	269	226	276	299	225	279	248	193	342	273	265	224	283	275	190	219	208	254	272	289	332	260	253	255
4930430O22Rik	0	2	1	3	2	0	3	0	1	2	0	0	0	3	0	1	0	0	2	1	0	0	0	4
4930431F12Rik	0	0	3	0	1	0	0	0	1	0	0	0	3	0	0	0	0	0	1	1	0	1	0	4
4930431L21Rik	0	0	0	0	0	2	5	1	0	0	0	0	0	0	1	0	1	0	0	0	4	1	0	0
4930431P03Rik	1	3	1	2	4	0	14	0	4	1	0	16	0	3	0	1	1	3	0	7	0	13	0	5
4930431P19Rik	63	55	85	72	38	47	57	43	55	72	47	48	96	68	44	44	39	64	64	52	68	15	42	38
4930432B10Rik	3	2	3	7	7	10	10	1	2	1	0	1	2	1	3	1	3	2	2	3	4	7	0	0
4930432E11Rik	6	1	7	11	3	0	9	2	1	0	7	0	0	2	1	0	1	0	1	0	0	3	0	1
4930432H08Rik	0	0	0	6	0	3	1	0	0	0	0	0	0	0	0	0	0	0	0	0	0	1	0	1
4930432K21Rik	56	86	88	76	76	84	69	62	133	101	99	50	91	130	65	55	62	64	64	69	18	76	74	98
4930432L08Rik	6	1	0	1	0	4	7	0	0	0	3	3	1	3	2	0	0	3	0	1	0	3	0	0
4930432M17Rik	0	0	0	0	0	0	4	0	0	1	0	0	0	0	0	0	0	0	0	0	0	1	0	0
4930433B08Rik	0	0	0	0	0	0	0	0	0	0	2	0	0	0	0	0	0	0	0	1	0	0	0	0
4930433I11Rik	0	1	0	0	0	0	4	0	0	0	0	0	1	5	0	0	0	0	0	0	0	1	0	1
4930433J02Rik	0	1	0	0	0	0	2	0	0	0	0	1	0	0	0	0	0	0	0	0	0	0	0	0
4930433N12Rik	0	3	5	1	2	2	3	1	1	3	0	2	0	1	1	3	3	3	1	2	0	2	2	1
4930434B07Rik	1	0	0	0	1	0	5	0	0	1	0	0	0	0	1	0	0	1	0	0	0	0	0	0
4930434O05Rik	0	0	0	0	0	0	0	4	0	0	0	0	0	0	0	0	0	0	0	0	0	0	0	2
4930435C17Rik	0	0	1	2	0	0	1	2	0	2	1	0	0	0	0	0	0	0	0	0	0	0	0	1
4930435E12Rik	0	1	0	0	0	0	9	0	0	0	0	0	0	0	0	0	0	0	1	1	1	2	0	0
4930435N07Rik	1	1	4	0	8	0	4	4	4	2	0	1	6	2	1	0	2	3	0	0	0	2	0	0
4930438A08Rik	7	6	1	4	3	0	4	2	6	3	4	0	4	0	1	0	0	3	4	0	0	1	3	0
4930438E09Rik	4	0	3	1	2	1	3	2	3	1	10	0	1	0	0	2	0	0	0	5	1	1	1	5
4930439A04Rik	35	29	38	23	38	23	56	18	34	24	36	18	61	34	14	13	10	26	14	47	12	21	21	15
4930439D14Rik	19	16	9	19	12	17	9	9	17	11	12	11	28	6	15	13	8	12	6	12	9	20	9	12
4930440C22Rik	0	1	0	1	2	4	16	5	1	7	1	2	0	3	0	0	0	0	3	2	10	1	0	0
4930440I19Rik	2	4	2	4	4	3	10	1	0	4	4	0	0	2	0	3	1	7	3	5	2	5	0	4
4930441H08Rik	0	0	0	2	0	0	0	0	0	0	0	0	0	2	0	0	0	1	0	3	0	0	0	2
4930441J16Rik	2	0	0	0	1	0	5	2	2	2	0	1	0	0	0	0	0	0	0	0	0	0	0	0
4930442H23Rik	3	1	3	0	4	8	13	3	4	9	2	6	3	4	3	1	3	3	4	1	2	5	1	2
4930442J19Rik	0	0	0	0	0	0	2	0	0	0	1	0	0	0	0	0	0	0	0	0	0	0	0	0
4930442L01Rik	0	0	0	0	0	1	2	0	0	2	0	0	0	0	0	0	0	0	0	1	0	0	0	1
4930442P19Rik	0	0	0	0	0	0	3	0	4	0	1	0	12	1	1	1	5	5	8	8	1	8	6	9
4930443G03Rik	1	0	0	0	2	0	4	0	0	0	0	0	0	1	0	0	0	0	0	1	0	0	0	0
4930443O20Rik	1	1	4	2	3	0	1	0	4	7	0	1	6	6	0	1	0	7	3	3	3	2	0	1
4930444A19Rik	24	18	14	12	24	31	25	6	19	0	23	8	24	11	8	20	24	7	6	31	10	23	5	22
4930444E06Rik	2	0	0	0	1	1	8	0	0	0	3	0	0	0	0	0	0	0	0	0	0	1	0	1
4930444G20Rik	0	0	0	0	0	0	2	0	3	0	0	0	0	0	0	0	0	0	0	0	0	0	0	0
4930444M15Rik	2	1	9	1	5	6	5	5	0	1	1	1	0	0	0	5	4	0	1	0	2	3	0	1
4930444P10Rik	114	55	95	67	50	81	86	54	70	112	127	50	48	99	50	55	38	49	73	66	52	70	77	61
4930445B16Rik	2	4	4	1	9	9	24	5	12	2	6	1	15	2	3	4	7	1	5	12	2	5	1	0
4930445N08Rik	1	0	0	0	3	0	5	0	0	0	1	0	0	0	0	0	0	0	0	0	0	1	1	0
4930445N18Rik	3	0	0	5	3	2	4	1	2	0	0	0	1	0	0	4	0	0	6	2	3	6	0	0
4930447A16Rik	0	0	0	0	1	1	1	0	0	0	2	0	0	0	0	0	0	0	2	0	0	1	0	0
4930447C04Rik	201	223	260	193	146	83	114	82	210	184	228	139	342	282	159	183	199	194	141	187	227	240	179	148
4930447C11Rik	0	2	1	0	0	4	0	0	0	0	2	0	0	0	0	0	0	0	0	0	0	0	0	0
4930447F04Rik	0	0	0	0	0	0	2	0	0	0	0	0	0	0	0	0	0	0	0	2	0	0	0	0
4930447F24Rik	55	106	43	115	76	84	83	52	92	19	88	55	139	81	44	49	49	10	80	68	82	62	73	57
4930447M23Rik	202	135	219	198	134	172	220	155	156	181	217	174	164	270	149	122	147	210	149	200	203	163	158	151
4930447N08Rik	5	1	8	0	2	6	10	1	2	2	4	1	1	1	3	3	2	4	0	1	6	14	2	0
4930448A20Rik	2	0	0	3	0	0	1	0	0	0	0	0	0	0	0	0	0	0	0	0	0	3	0	0
4930448D08Rik	0	0	0	0	0	0	2	0	0	0	0	0	0	0	0	0	0	0	0	0	0	0	0	0
4930448E22Rik	5	10	6	1	6	3	1	3	3	0	1	3	8	7	4	2	9	1	8	10	2	0	3	3
4930448H16Rik	1	2	7	2	4	3	2	1	0	4	4	3	7	7	0	0	3	0	7	2	4	8	2	2
4930448I06Rik	0	0	0	0	1	1	2	0	0	0	0	0	0	0	0	0	1	1	0	0	0	3	0	0
4930448I18Rik	2	0	0	0	0	2	9	0	0	0	0	0	0	0	0	0	0	1	2	0	4	0	0	0
4930448K20Rik	0	0	1	0	0	0	0	0	0	5	0	1	0	0	0	0	2	0	0	1	0	0	0	0
4930448N21Rik	1	0	0	2	0	3	1	3	1	4	2	0	0	2	0	0	4	0	0	0	0	1	0	0
4930449A18Rik	0	0	2	0	5	0	5	1	0	5	2	4	0	0	0	1	0	3	0	1	0	2	0	0
4930449E01Rik	2	2	2	6	8	2	0	0	0	0	1	2	0	2	1	0	0	5	1	1	0	3	1	3
4930449I04Rik	8	4	7	7	4	10	4	6	3	5	5	7	9	15	2	6	1	0	8	4	8	2	1	7
4930449I24Rik	0	1	0	0	0	0	1	0	0	0	0	0	0	0	0	0	0	0	0	0	0	0	0	0
4930451E10Rik	7	4	10	0	3	5	1	2	2	2	0	0	3	2	0	0	1	3	4	0	0	4	5	2
4930451G09Rik	380	370	338	347	272	483	260	331	313	323	321	227	515	294	168	204	224	311	373	342	346	194	265	266
4930451I11Rik	0	1	2	0	1	4	1	0	0	0	1	0	0	1	7	0	0	0	0	0	0	0	3	1
4930452B06Rik	115	137	158	137	137	170	106	144	223	194	144	132	128	156	83	120	127	105	151	117	100	124	142	122
4930452N14Rik	0	1	0	0	2	1	0	0	0	0	1	1	0	0	0	0	0	0	2	0	0	0	2	0
4930453H23Rik	0	0	0	1	0	2	23	8	0	5	3	3	2	0	0	0	0	0	1	1	0	2	0	1
4930453L07Rik	19	12	2	4	9	4	21	12	7	9	6	3	5	11	4	2	13	10	10	9	2	4	4	10
4930453N24Rik	2837	2483	2724	2897	2827	3508	2576	2746	2868	3241	2839	1933	3235	2871	1453	2281	3078	2738	3016	3630	2954	2279	2600	3134
4930453O03Rik	0	0	0	0	4	2	0	0	0	1	0	0	0	0	0	0	0	0	0	0	0	0	2	1
4930455B14Rik	0	1	0	0	1	3	23	3	3	2	0	0	0	0	0	0	4	1	0	0	0	4	0	1
4930455D15Rik	0	2	0	1	0	0	3	0	0	1	0	0	0	1	1	0	0	0	1	1	0	0	4	0
4930455G09Rik	5	14	10	9	1	2	8	10	5	11	9	11	5	8	0	5	1	0	0	1	23	10	0	1
4930455H04Rik	0	0	0	0	1	1	3	2	0	0	0	0	0	0	0	2	0	0	0	1	0	0	0	0
4930456G14Rik	7	11	11	7	9	5	10	1	18	6	9	1	7	4	6	1	7	12	5	2	19	4	4	7
4930456L15Rik	0	0	0	0	1	0	4	0	2	0	0	1	3	0	0	0	0	0	1	3	2	8	0	0
4930458D05Rik	4	2	7	2	12	4	2	0	13	6	0	0	4	11	10	6	6	15	17	13	3	21	22	9
4930459L07Rik	0	0	0	0	0	2	0	2	0	0	4	0	0	0	0	0	1	0	0	0	0	0	0	0
4930461C15Rik	0	5	8	4	8	9	7	11	11	7	6	0	5	7	0	4	8	3	2	7	6	9	4	6
4930461G14Rik	1	0	0	0	0	1	12	0	1	0	1	0	0	0	0	0	0	1	0	0	0	1	0	0
4930463O16Rik	10	3	1	1	1	3	12	0	0	3	2	0	2	3	4	0	1	0	0	2	2	6	3	1
4930465K10Rik	1	5	2	0	0	6	13	7	0	2	3	0	2	3	2	1	3	7	0	2	13	0	0	2
4930465M20Rik	6	9	3	14	1	2	8	1	3	2	13	3	5	3	7	5	4	0	0	2	0	0	5	1
4930466I24Rik	0	0	0	0	1	0	6	0	7	1	9	0	2	0	1	4	0	0	0	1	0	6	1	2
4930467D21Rik	0	2	10	0	1	5	10	1	1	4	0	0	4	3	0	2	0	0	3	0	6	5	0	1
4930467E23Rik	0	0	0	0	0	0	3	1	0	0	0	1	0	0	0	0	0	0	1	0	0	0	0	0
4930467K11Rik	13	12	3	9	15	10	8	4	5	8	11	4	4	5	0	6	15	17	21	9	21	6	6	11
4930469B13Rik	0	0	0	0	0	0	3	0	0	0	0	0	0	0	0	0	0	0	0	0	0	0	0	0
4930469G21Rik	8	6	6	3	5	2	5	0	9	4	1	2	4	9	0	10	0	1	0	7	3	4	2	6
4930469K13Rik	5	1	1	7	0	5	5	1	0	7	1	0	1	8	2	0	1	0	1	1	0	5	2	0
4930470B04Rik	0	0	0	0	0	1	1	9	0	0	0	0	0	0	0	0	0	0	0	0	0	1	0	0
4930470G03Rik	6	1	6	2	1	3	3	1	8	1	7	2	0	3	5	2	1	2	3	4	3	5	2	3
4930470P17Rik	0	1	0	4	0	2	2	6	2	0	0	0	0	0	0	0	1	0	0	2	1	11	1	0
4930471C04Rik	0	5	8	1	7	5	9	2	3	1	6	0	7	0	3	1	2	1	3	4	6	2	0	1
4930471C06Rik	0	0	0	1	0	0	0	1	0	0	1	0	0	0	0	0	0	0	0	1	0	0	0	1
4930471D02Rik	0	3	1	0	0	0	13	0	1	0	0	0	0	0	0	0	0	0	0	0	0	0	0	0
4930471M09Rik	14	9	7	16	4	10	6	5	10	5	1	3	7	7	0	6	2	7	3	19	6	2	7	8
4930473A02Rik	24	21	24	19	18	26	16	18	38	26	30	12	25	16	13	17	24	13	8	15	12	14	6	17
4930473D10Rik	2	1	11	2	1	4	8	0	8	11	7	4	0	3	0	6	3	5	2	0	0	1	1	5
4930474B08Rik	0	1	1	0	1	0	1	0	0	0	0	0	0	0	0	0	0	0	0	0	1	0	4	0
4930474H06Rik	4	3	0	0	1	0	0	0	1	0	1	2	0	0	0	0	0	1	3	0	0	0	0	0
4930474N05Rik	0	0	0	0	1	0	3	0	0	2	0	0	2	0	0	0	0	0	0	0	0	0	0	2
4930477E14Rik	0	3	0	0	0	0	0	0	0	0	4	0	0	0	0	0	0	0	0	0	1	0	0	0
4930477O15Rik	2	2	3	0	3	0	4	5	0	1	0	5	3	3	0	1	2	4	1	1	2	4	0	0
4930478K11Rik	1	4	0	0	1	5	4	2	4	0	2	5	2	4	2	3	4	6	3	4	1	0	0	2
4930478M09Rik	0	0	0	0	2	0	0	1	2	3	0	0	0	1	0	0	0	0	0	0	0	2	0	0
4930478P22Rik	0	0	1	0	3	3	13	2	0	1	1	0	0	0	0	0	0	0	2	2	6	4	0	0
4930479D17Rik	12	2	6	14	7	2	5	2	4	16	12	0	0	3	0	9	12	6	1	14	1	4	5	9
4930480E11Rik	0	0	0	0	1	0	4	0	0	0	0	0	0	0	0	0	0	0	0	0	0	2	0	0
4930480G23Rik	0	0	0	0	0	0	1	1	0	0	0	0	0	0	0	0	0	0	0	0	0	4	0	0
4930480K02Rik	0	0	0	0	0	0	10	0	1	5	0	0	0	0	1	2	0	0	0	0	1	1	0	0
4930480K15Rik	24	27	11	21	17	11	28	9	22	18	35	9	57	20	17	7	9	6	7	13	30	16	22	17
4930480K23Rik	568	550	202	284	493	654	132	346	626	549	181	387	379	372	299	386	339	279	329	504	362	191	257	469
4930481A15Rik	26	82	44	34	44	33	79	41	69	30	63	30	74	50	36	36	61	48	96	46	100	40	44	29
4930481B07Rik	60	37	28	36	44	44	23	46	47	36	37	25	37	28	37	21	19	27	43	38	25	23	25	35
4930483J18Rik	6	3	2	7	6	4	2	3	5	13	2	2	10	7	6	4	3	6	3	3	4	6	2	1
4930483K19Rik	17	16	13	9	17	10	15	18	22	22	24	5	24	15	9	19	24	10	5	12	13	19	9	11
4930486F22Rik	7	1	1	1	2	2	11	1	6	0	1	3	2	3	2	1	1	1	2	2	2	0	0	2
4930486I03Rik	0	0	0	0	0	0	3	0	0	0	0	0	0	2	0	0	0	0	0	0	0	0	0	0
4930486L24Rik	0	0	0	1	2	2	10	0	0	1	1	0	0	8	0	0	0	0	0	0	0	8	1	1
4930486N12Rik	0	0	0	0	0	0	0	0	0	0	0	0	0	0	0	0	0	2	0	0	0	1	0	0
4930487D11Rik	0	0	0	0	0	0	0	0	0	0	0	0	0	0	0	0	0	0	0	0	0	0	0	0
4930488B22Rik	0	3	0	0	1	0	1	0	0	0	0	0	0	0	0	0	0	0	0	0	0	1	0	0
4930488N24Rik	5	1	1	0	1	7	30	3	2	0	0	4	0	1	0	3	0	0	2	1	0	7	0	1
4930500F04Rik	0	0	0	2	0	0	5	0	0	0	0	0	0	2	0	0	1	0	0	0	0	4	0	0
4930500F10Rik	26	18	29	57	28	13	24	26	30	27	26	8	6	3	13	6	7	7	30	13	12	6	10	2
4930500L23Rik	1	2	1	1	1	1	2	2	1	1	3	1	10	2	2	3	0	8	1	2	0	1	0	0
4930500M09Rik	4	1	3	5	3	3	3	0	5	6	2	0	3	2	1	7	3	2	2	1	0	2	1	4
4930502C17Rik	6	0	1	3	0	2	4	1	0	1	0	0	2	1	0	0	0	0	0	0	0	4	0	1
4930502E09Rik	8	12	0	8	5	8	8	5	5	7	3	4	5	5	4	2	5	3	11	7	1	5	4	5
4930502E18Rik	9	2	0	4	0	0	14	3	3	3	0	5	7	5	2	3	2	4	12	7	1	6	0	2
4930503B20Rik	0	0	0	0	1	0	0	0	0	0	0	0	0	0	0	0	0	0	0	0	0	0	0	0
4930503E14Rik	0	1	2	2	1	1	2	0	0	0	0	1	0	0	0	1	0	0	0	0	0	0	0	0
4930503H13Rik	0	0	0	0	0	0	2	0	0	0	0	2	0	0	0	0	0	0	0	0	0	0	0	0
4930503L19Rik	962	1091	1217	992	1275	1166	1160	986	1198	990	1135	783	1252	1298	524	974	1456	1288	1111	1446	1151	957	943	1179
4930503O07Rik	0	0	0	0	0	1	3	0	0	0	0	1	0	0	0	0	1	0	0	0	1	0	0	0
4930504D19Rik	0	0	0	0	0	0	3	0	0	0	0	0	1	0	0	1	0	0	0	0	0	0	0	0
4930504O13Rik	0	0	0	0	0	1	4	0	0	1	0	0	0	0	0	0	0	0	0	0	0	0	0	0
4930505A04Rik	6	15	12	4	15	4	4	3	7	3	5	4	11	1	0	11	11	4	5	4	9	4	0	6
4930505G20Rik	0	0	0	0	0	0	0	0	0	0	0	0	0	0	0	0	0	0	0	0	0	0	0	0
4930505K14Rik	0	0	0	0	0	0	1	0	0	0	2	1	0	0	0	0	0	1	0	0	0	0	0	0
4930505M18Rik	39	43	44	32	59	38	47	48	27	17	33	25	38	61	16	50	39	28	32	113	32	46	22	81
4930505N22Rik	19	24	14	18	11	31	32	12	17	19	18	12	39	27	14	17	15	8	20	23	17	28	8	10
4930505O20Rik	0	0	0	0	1	0	1	0	0	0	0	0	0	0	0	0	0	0	0	0	2	0	0	0
4930506C21Rik	33	15	25	15	17	21	16	11	19	17	17	24	32	31	17	13	16	16	8	19	20	9	16	16
4930507D05Rik	72	67	79	69	88	71	57	49	101	82	124	45	76	67	27	67	61	51	46	68	24	66	42	74
4930507D10Rik	0	0	0	0	0	0	7	0	0	4	0	0	0	0	0	0	0	0	0	0	0	0	1	0
4930509E16Rik	0	5	3	4	7	1	5	0	0	0	0	0	0	1	0	2	0	6	0	6	0	0	0	0
4930509G22Rik	6	5	9	9	12	2	6	1	4	3	6	5	12	4	2	0	4	7	3	6	12	16	1	4
4930509H03Rik	83	70	32	53	53	66	27	69	35	37	58	29	53	39	37	19	55	23	29	86	20	20	28	51
4930509J09Rik	5	2	9	4	1	2	3	0	2	0	2	0	7	0	0	2	0	0	2	0	0	1	2	0
4930509K18Rik	1	0	0	0	0	0	1	1	0	0	7	2	0	0	0	0	0	0	0	0	0	0	0	0
4930510E17Rik	0	0	1	0	1	3	21	0	0	0	0	0	0	0	0	5	1	0	1	2	0	0	0	0
4930511A02Rik	0	0	0	0	2	0	13	0	0	4	4	0	0	0	3	2	0	0	2	0	0	0	0	1
4930511E03Rik	20	0	7	5	1	3	2	0	1	5	1	14	1	19	3	5	1	0	2	1	0	2	2	0
4930511M06Rik	3	2	4	3	5	3	12	8	1	0	4	3	8	3	4	2	6	4	1	6	0	5	1	5
4930511M18Rik	0	0	0	0	1	0	6	1	0	0	0	0	0	0	1	2	1	1	0	1	0	3	1	1
4930511O05Rik	0	1	0	0	0	1	1	2	0	1	0	0	0	1	0	0	0	0	0	0	0	0	0	0
4930512B01Rik	17	19	14	15	10	11	36	14	9	14	17	7	16	14	20	15	10	7	12	35	8	17	20	21
4930512H18Rik	2	3	1	1	2	0	7	2	2	5	0	0	2	0	0	0	3	3	13	4	4	0	1	1
4930512M02Rik	0	0	0	0	0	2	4	0	2	0	0	0	0	1	1	0	0	0	0	0	0	0	0	1
4930512P04Rik	2	0	1	2	0	0	2	0	1	2	0	3	2	0	0	0	0	1	0	0	0	1	1	0
4930513D17Rik	0	0	4	0	2	4	7	0	0	0	0	0	0	0	0	1	0	1	0	2	0	14	1	2
4930513N10Rik	64	60	52	70	44	48	84	31	43	78	44	18	52	55	50	42	47	36	46	42	91	45	57	39
4930513N20Rik	1	1	1	0	0	0	0	1	1	1	0	2	1	0	0	0	1	0	0	0	0	0	2	0
4930513O06Rik	0	0	0	0	0	0	1	0	0	0	0	0	0	0	0	0	0	0	1	0	0	1	0	0
4930515B02Rik	0	0	0	0	0	0	1	0	0	1	0	0	0	0	0	0	0	0	0	0	0	0	0	0
4930515G01Rik	31	54	30	33	39	42	44	34	45	38	28	27	30	34	29	35	23	33	33	38	24	43	36	31
4930515G13Rik	1	4	0	4	1	0	7	1	0	0	1	0	0	0	0	0	0	0	0	0	0	1	0	0
4930515G16Rik	0	0	0	0	0	0	0	0	1	0	0	0	0	0	0	0	0	0	0	0	1	0	0	0
4930515L19Rik	0	0	0	0	0	1	0	0	0	0	0	0	0	0	0	0	0	0	0	0	0	0	0	0
4930516B21Rik	502	411	565	501	665	555	573	599	500	454	639	443	586	508	408	496	601	395	443	804	604	514	441	611
4930516K23Rik	0	1	0	0	1	3	4	0	1	0	0	0	0	0	0	0	0	0	0	0	0	0	0	2
4930517E11Rik	14	11	14	0	11	10	20	2	17	8	19	4	6	12	0	9	8	2	5	7	0	21	13	17
4930517G19Rik	11	7	13	27	8	11	10	7	10	1	18	12	20	24	9	9	26	3	1	17	16	16	3	19
4930517J16Rik	6	0	9	0	13	3	9	8	3	3	0	5	6	23	4	3	8	11	17	12	17	5	14	4
4930517L18Rik	2	1	0	0	1	0	1	0	0	2	2	0	0	1	0	0	0	0	0	0	0	1	0	0
4930517O19Rik	4	10	13	7	24	7	12	9	8	7	13	5	18	16	1	8	12	2	5	18	8	21	4	9
4930518C09Rik	48	31	50	19	43	19	36	27	14	15	24	12	15	28	8	16	18	21	20	46	13	29	15	16
4930518I15Rik	56	60	33	73	52	75	65	36	54	63	68	33	74	52	35	67	37	36	67	74	29	51	65	43
4930518I17Rik	0	0	0	0	0	0	1	0	0	0	0	0	0	0	0	0	0	0	0	0	0	0	0	0
4930518J20Rik	0	0	0	0	0	1	0	0	0	0	1	0	0	0	0	0	0	0	0	1	0	0	0	0
4930519A11Rik	0	0	0	0	1	1	1	0	0	0	0	0	4	5	0	0	1	4	1	0	1	0	1	0
4930519D14Rik	0	0	0	0	0	0	1	0	0	0	1	0	0	0	0	0	0	0	0	0	0	1	0	0
4930519E07Rik	4	0	1	0	1	2	3	0	0	0	2	0	0	0	0	0	0	0	0	0	0	0	0	0
4930519F09Rik	0	0	0	0	0	0	0	0	0	5	0	0	0	3	0	0	0	0	0	0	1	0	0	1
4930519F16Rik	7	10	8	11	22	17	29	6	15	11	10	9	3	10	17	6	16	11	12	21	18	5	8	7
4930519F24Rik	2	0	0	0	1	0	0	0	0	1	0	0	0	0	0	0	1	0	0	0	0	0	0	0
4930519G04Rik	1	1	0	1	4	4	13	1	3	1	3	4	0	3	0	0	0	9	3	3	3	5	1	0
4930519H02Rik	0	0	0	0	0	0	8	0	0	0	3	0	0	0	0	1	0	0	0	0	1	2	0	1
4930519L02Rik	0	0	1	1	0	0	5	1	0	1	0	1	0	2	0	1	0	0	0	0	0	0	0	0
4930519P11Rik	8	8	2	11	4	2	1	7	8	0	6	2	3	8	11	1	2	4	2	2	0	7	2	5
4930520M14Rik	1	0	0	1	8	6	2	4	1	1	0	0	5	1	0	0	1	0	1	1	0	4	0	3
4930520O04Rik	38	38	43	40	16	17	12	16	20	29	34	38	65	68	35	41	21	64	21	26	38	32	61	46
4930521E06Rik	1	0	0	0	0	0	1	1	0	0	0	0	0	2	0	0	0	1	0	0	0	0	0	0
4930522H14Rik	0	1	0	0	1	1	16	0	0	3	0	0	0	0	0	0	1	0	0	0	0	0	0	0
4930522L14Rik	124	94	137	110	152	147	88	127	128	137	179	159	92	179	65	69	75	110	44	121	119	98	67	124
4930522N08Rik	0	0	0	0	2	0	0	0	0	0	0	0	0	0	0	2	0	0	0	0	0	1	0	0
4930522O17Rik	0	0	1	0	1	0	3	0	0	0	0	0	0	0	0	0	0	0	0	0	0	0	0	0
4930523C07Rik	4	3	1	2	6	2	27	0	0	9	0	0	3	2	0	4	3	0	1	4	0	0	0	1
4930524B15Rik	8	20	20	23	16	10	17	13	9	8	23	10	20	4	2	6	12	5	16	25	21	20	0	14
4930524B17Rik	0	2	0	4	1	0	5	0	0	1	2	0	1	0	0	0	0	0	1	0	0	0	0	1
4930524J08Rik	14	22	23	18	16	14	16	18	13	10	25	13	12	12	15	16	12	26	19	19	15	17	13	17
4930524N10Rik	0	0	0	0	0	0	5	0	0	1	0	0	0	0	0	0	0	0	0	0	1	0	0	0
4930524O07Rik	25	23	16	25	9	23	28	14	17	14	24	22	12	18	15	15	5	7	12	9	14	7	16	24
4930524O08Rik	0	1	0	0	1	0	10	3	5	2	2	0	0	1	4	0	0	0	2	2	0	2	0	0
4930525G20Rik	49	24	40	35	25	49	21	45	38	41	39	42	27	31	17	45	31	35	7	36	6	34	37	58
4930526A20Rik	54	51	37	60	59	46	49	28	45	37	50	26	97	48	43	41	58	24	77	59	77	48	69	40
4930526F13Rik	0	0	0	0	0	1	0	0	3	1	1	0	0	0	0	0	0	5	1	0	0	0	0	2
4930526L06Rik	0	1	0	0	5	1	1	0	1	0	2	0	0	0	0	0	0	0	0	0	0	1	0	0
4930526M16Rik	0	0	0	0	0	0	0	0	0	0	0	0	0	0	0	0	0	0	0	1	0	0	0	0
4930527A07Rik	0	0	2	0	0	1	0	0	0	0	0	0	0	0	0	0	1	0	3	0	0	2	0	0
4930527B05Rik	0	0	0	0	0	0	5	1	0	0	1	0	0	0	0	0	0	0	0	0	0	1	0	0
4930527E20Rik	0	5	0	1	7	2	3	0	1	2	4	0	2	1	4	2	3	0	1	1	0	1	1	2
4930527J03Rik	4	3	6	13	3	2	3	9	3	12	4	9	12	6	1	8	9	8	8	5	3	4	0	7
4930528D03Rik	0	0	0	0	2	2	11	0	1	0	3	6	0	1	0	0	0	0	0	2	0	0	0	0
4930528G23Rik	0	0	2	0	1	1	0	0	0	1	0	0	0	1	0	0	0	0	1	0	0	2	0	0
4930528J11Rik	11	8	8	3	9	2	16	5	9	11	11	2	16	13	12	17	4	2	6	13	1	16	1	18
4930528P14Rik	0	0	0	0	1	1	3	0	0	0	0	0	1	0	0	0	2	1	1	0	3	0	0	1
4930529C04Rik	0	1	1	1	4	5	7	1	3	4	5	1	2	6	1	1	5	3	1	4	6	2	1	2
4930529I22Rik	0	0	0	1	2	0	6	0	1	0	0	0	0	0	2	0	2	0	0	1	0	2	0	0
4930532G15Rik	27	26	21	22	21	25	23	9	15	17	15	9	27	23	13	18	14	24	12	31	19	24	9	30
4930532M18Rik	0	0	3	1	0	0	3	0	0	0	0	1	0	0	0	0	0	0	0	0	0	0	0	0
4930533B01Rik	0	0	2	1	0	3	0	0	0	0	0	3	0	0	0	1	0	0	0	0	0	1	0	1
4930533D04Rik	0	1	0	3	1	0	0	1	0	0	3	0	0	0	0	0	0	2	0	0	0	8	0	2
4930533I22Rik	4	0	1	0	1	0	4	0	2	1	2	0	0	0	2	1	0	0	1	0	0	0	2	1
4930533K18Rik	0	0	0	0	0	0	7	0	0	0	3	0	0	0	0	0	0	0	0	0	0	0	0	1
4930533L02Rik	0	0	0	0	0	0	1	0	0	0	0	0	0	0	0	0	0	0	0	0	0	0	0	0
4930533O14Rik	9592	13304	10144	11783	11341	12809	10475	10228	14752	11538	10814	9412	14970	13436	7541	8699	13801	15944	14337	12968	11714	10656	12347	10691
4930533P14Rik	0	0	0	0	0	0	2	0	0	0	0	0	2	0	0	0	1	0	0	0	0	0	0	0
4930534D22Rik	2	0	2	2	3	1	1	3	1	7	0	0	2	0	0	0	0	4	0	0	0	2	0	3
4930535E02Rik	0	0	0	0	1	1	0	0	0	1	0	0	0	0	0	1	0	0	0	0	0	0	0	0
4930535G08Rik	0	0	0	2	0	0	1	0	2	0	0	0	0	0	0	0	0	0	0	0	0	1	0	0
4930535I16Rik	8	1	7	3	6	5	10	1	4	4	6	5	6	5	0	9	8	6	3	11	5	7	6	6
4930535L15Rik	1	0	0	0	0	1	0	0	0	0	0	0	0	0	0	0	0	0	0	0	0	0	0	0
4930535O05Rik	0	0	0	0	0	0	0	0	0	0	0	0	0	0	0	0	0	0	0	0	0	1	0	0
4930537H20Rik	14	12	3	12	21	20	16	12	12	9	6	7	26	9	7	11	15	10	6	17	5	6	6	13
4930538E20Rik	8	19	18	21	31	21	16	15	26	8	25	26	21	31	14	17	7	21	20	36	5	20	10	13
4930538K18Rik	20	16	17	24	16	12	29	23	18	17	34	13	22	24	9	19	10	8	14	13	11	10	8	11
4930539C22Rik	0	0	0	0	3	0	3	0	0	0	0	0	0	0	0	0	0	0	0	0	0	0	0	0
4930539E08Rik	4	9	2	9	4	4	8	6	32	6	9	18	0	0	7	4	7	2	11	6	22	9	25	1
4930539J05Rik	18	11	6	6	6	10	9	3	5	9	5	11	14	4	0	14	2	3	12	8	5	1	2	1
4930539M17Rik	2	2	2	0	0	0	0	2	0	0	0	1	0	0	0	0	0	0	2	0	0	0	3	0
4930540E01Rik	0	2	2	0	0	0	3	2	1	0	0	0	0	0	0	0	0	0	0	0	0	0	0	0
4930540M05Rik	5	1	3	6	1	9	1	0	2	0	8	3	2	3	1	5	3	1	1	3	2	10	0	10
4930542C12Rik	0	0	0	0	0	0	0	0	0	0	0	0	0	0	0	0	0	0	0	0	0	1	0	1
4930542C16Rik	2	0	0	1	0	0	2	0	0	0	0	0	0	1	0	2	0	0	1	0	0	1	0	0
4930544D05Rik	0	0	1	0	0	0	3	0	0	0	3	0	0	2	0	0	1	0	0	5	0	0	0	0
4930544G11Rik	0	2	0	0	1	1	7	3	0	0	0	0	0	0	0	0	0	0	1	1	0	0	6	0
4930544I03Rik	0	0	0	0	0	0	0	3	0	0	0	0	0	0	0	0	0	1	0	0	0	0	0	2
4930544L04Rik	7	16	10	5	5	2	26	11	12	1	7	9	0	4	0	0	0	0	1	2	0	9	0	0
4930544M13Rik	0	3	0	1	0	12	3	0	0	0	0	0	0	0	0	0	0	0	0	0	0	1	0	0
4930545L23Rik	15	11	11	0	9	15	39	10	7	5	5	4	12	9	7	4	7	3	8	3	9	13	7	19
4930546C10Rik	0	0	0	0	2	2	5	0	0	0	0	1	1	0	0	0	0	0	0	1	0	0	2	0
4930547E08Rik	0	0	2	5	1	2	3	0	2	1	2	0	1	0	0	1	0	2	0	1	0	5	1	1
4930547M16Rik	29	16	23	15	16	35	21	7	17	27	4	7	10	23	15	15	0	27	26	26	3	20	35	16
4930548G14Rik	3	0	0	0	2	6	4	0	0	1	0	0	0	0	0	0	0	3	0	0	0	2	0	0
4930548H24Rik	6	2	4	9	2	6	15	11	3	1	4	5	10	8	1	0	3	2	1	5	0	6	0	5
4930548K13Rik	0	0	0	0	0	0	0	0	0	0	0	0	0	1	2	0	0	0	0	0	0	0	0	0
4930549C01Rik	0	0	1	3	0	0	10	0	0	0	0	0	0	0	0	1	0	0	0	1	0	0	0	0
4930550C14Rik	9	4	4	13	4	7	8	1	8	8	0	0	2	0	3	5	8	2	2	4	2	0	5	1
4930550C17Rik	5	0	2	0	1	3	10	2	0	0	1	3	0	1	0	1	0	3	0	1	3	0	0	2
4930550L24Rik	0	0	0	0	2	1	1	2	0	0	0	0	0	0	0	0	0	0	4	0	0	0	0	0
4930551L18Rik	0	0	1	0	0	5	2	2	0	0	1	0	0	1	0	0	0	0	0	3	0	0	1	1
4930551O13Rik	2	0	0	0	1	0	5	0	0	1	5	0	1	2	0	2	2	2	1	2	1	3	0	0
4930552N02Rik	0	0	0	0	1	3	10	3	0	0	0	0	0	0	0	0	0	1	0	1	0	3	0	0
4930552P12Rik	3	4	5	14	1	6	10	5	1	0	8	5	1	10	7	3	5	0	0	3	9	4	0	7
4930553I04Rik	0	0	1	0	0	0	2	0	0	0	0	0	1	0	0	0	0	0	0	1	0	0	0	0
4930553M12Rik	0	0	0	0	0	0	1	0	0	0	0	0	0	0	0	0	0	0	0	0	0	0	0	0
4930553P18Rik	180	109	165	141	97	72	42	86	118	165	136	82	85	136	122	110	67	77	104	101	90	69	162	53
4930554C24Rik	0	1	0	0	0	0	5	0	0	0	5	0	0	1	0	0	0	0	0	0	5	0	1	0
4930554G22Rik	0	0	0	0	0	0	0	0	0	0	0	0	0	0	0	0	0	0	0	1	0	0	0	0
4930554G24Rik	2	1	3	0	0	2	2	0	0	3	1	0	1	0	2	0	0	0	1	0	0	0	0	0
4930554H23Rik	0	0	2	0	0	5	2	1	0	0	1	1	1	3	3	1	2	0	0	1	1	0	0	0
4930555A03Rik	2	3	3	0	6	1	5	11	3	9	0	4	2	0	0	2	6	10	4	2	0	20	0	2
4930555B11Rik	11	10	15	14	5	12	22	5	0	6	16	1	0	8	5	13	2	8	24	3	0	8	6	4
4930555B12Rik	0	0	0	0	0	1	4	0	0	0	2	0	0	0	0	0	0	0	0	0	0	0	0	0
4930555F03Rik	13	3	21	8	3	4	17	3	2	2	7	8	5	5	4	3	8	0	1	6	0	9	0	2
4930555G01Rik	0	0	1	1	0	1	2	0	0	1	0	1	0	0	1	0	0	0	1	1	0	0	0	0
4930555K19Rik	0	0	0	0	1	0	0	0	0	0	0	0	0	0	0	0	0	0	0	0	0	1	0	0
4930555M17Rik	0	0	0	0	0	0	3	0	0	2	0	0	0	0	0	0	0	0	0	3	0	1	0	0
4930555O08Rik	0	0	1	0	1	0	5	2	0	0	0	0	0	0	0	0	0	0	0	0	0	0	0	0
4930556G01Rik	0	0	0	0	1	2	1	0	2	0	0	0	0	0	0	0	1	0	0	0	0	0	0	1
4930556G22Rik	0	0	0	0	0	0	4	1	0	0	0	0	0	0	0	0	0	0	0	0	0	1	0	0
4930556I23Rik	0	0	0	1	0	0	2	0	0	0	0	0	0	0	0	0	0	0	0	0	0	0	0	1
4930556J24Rik	2	0	0	6	0	0	0	0	1	1	1	0	0	1	0	3	0	0	0	2	0	3	0	1
4930556L07Rik	2	1	0	3	0	0	0	0	0	1	0	0	0	1	3	0	1	0	1	1	4	0	1	1
4930556M19Rik	12	7	17	7	17	23	49	29	19	14	10	16	4	11	4	10	12	11	21	19	13	29	4	13
4930556N13Rik	1	5	0	2	3	5	5	0	2	2	2	2	0	0	1	1	0	0	2	0	0	5	0	0
4930557A04Rik	0	0	0	0	0	0	0	0	0	0	0	0	0	0	0	0	0	0	0	0	0	0	0	0
4930557B06Rik	0	2	0	0	0	0	1	0	0	0	0	0	0	0	0	0	0	0	0	0	0	0	0	0
4930557F10Rik	1	1	0	0	0	2	5	0	0	0	2	0	0	1	1	1	0	2	0	0	1	1	1	3
4930557J02Rik	0	1	2	0	1	0	3	0	2	2	0	0	0	0	0	0	0	0	0	0	0	0	0	0
4930558C23Rik	0	0	0	0	0	0	8	0	0	0	0	1	0	0	0	0	0	0	0	3	0	5	0	2
4930558F17Rik	0	1	0	0	0	0	2	0	0	0	0	0	0	0	0	0	0	0	0	0	0	0	0	0
4930558G05Rik	4	0	0	0	0	0	12	1	0	0	0	3	0	2	3	0	0	0	0	1	1	3	1	0
4930558J18Rik	11	3	4	6	1	18	6	3	0	10	12	4	5	10	4	3	13	0	6	7	0	0	2	2
4930558J22Rik	0	0	0	0	0	0	0	1	0	0	0	0	0	0	0	0	0	0	0	0	0	5	0	0
4930558K02Rik	8	9	7	4	4	2	9	2	3	0	4	2	2	5	5	7	3	1	10	5	1	1	6	8
4930558N11Rik	0	1	0	3	2	3	3	3	0	5	0	0	0	1	0	1	0	4	0	0	0	2	0	2
4930560O18Rik	2	0	1	0	0	2	0	0	1	0	0	0	0	2	0	0	0	0	0	0	4	0	1	1
4930562A09Rik	0	1	1	0	0	0	0	0	0	0	0	0	2	0	0	0	0	0	0	0	0	0	1	0
4930562C15Rik	109	166	151	131	195	148	313	142	129	42	245	69	164	228	21	67	113	192	77	169	108	254	39	129
4930562D21Rik	1	0	3	5	1	1	15	1	2	0	0	3	5	3	1	2	4	0	2	0	0	3	1	2
4930562F07Rik	0	0	0	0	0	0	0	0	0	0	0	0	0	0	0	0	0	0	0	0	0	0	0	0
4930562F17Rik	4	0	0	0	1	0	1	0	0	2	4	0	0	0	0	0	1	0	2	0	0	1	0	1
4930563D23Rik	0	0	8	4	1	0	5	1	2	1	0	0	0	0	1	1	0	1	0	3	1	0	0	2
4930563E18Rik	1	0	0	1	1	0	3	0	3	0	0	0	3	0	0	1	0	0	0	0	1	0	0	1
4930563E22Rik	455	355	455	489	334	354	366	274	422	499	485	295	384	456	298	303	251	357	339	272	372	302	431	236
4930563F08Rik	2	1	4	0	5	3	10	4	3	0	6	0	8	6	2	0	0	5	2	2	4	4	2	9
4930563H07Rik	0	0	0	0	0	0	0	0	0	0	0	0	0	2	0	0	0	0	0	0	0	0	0	0
4930563I02Rik	1	0	1	1	1	3	5	3	0	0	1	1	1	0	0	1	0	0	0	2	0	1	3	0
4930563M21Rik	3	0	5	0	4	1	3	0	0	0	0	1	2	3	1	0	1	1	0	2	1	0	0	1
4930564D02Rik	0	3	0	1	0	7	10	1	0	0	0	0	1	2	1	0	0	0	0	0	0	0	0	0
4930565D16Rik	0	0	0	0	0	0	0	0	1	1	0	0	0	0	0	0	0	0	0	0	0	0	0	0
4930565N06Rik	4	2	0	7	5	1	4	1	1	8	2	0	0	3	0	2	4	1	0	5	0	1	2	0
4930566F21Rik	0	0	0	0	0	0	0	0	0	0	0	0	0	0	0	0	0	0	0	0	0	0	0	0
4930566N20Rik	0	2	4	3	1	6	1	1	4	1	4	8	0	6	0	1	2	0	1	0	0	5	0	2
4930567H17Rik	0	0	0	0	0	0	1	0	0	0	0	0	0	0	0	0	0	0	0	0	0	0	0	0
4930568A12Rik	4	1	0	0	0	0	4	1	0	0	0	2	2	5	0	1	4	1	1	0	0	0	0	0
4930568D16Rik	2	1	1	0	2	0	6	4	0	0	2	3	3	4	1	1	0	1	0	0	0	3	2	0
4930568G15Rik	3	0	0	1	2	1	12	8	2	1	6	7	0	1	1	3	4	4	4	2	0	2	10	1
4930569F06Rik	0	0	0	3	0	0	0	0	0	0	0	0	0	0	0	0	0	0	0	0	0	0	0	0
4930570D08Rik	0	0	0	0	0	0	0	0	0	0	0	0	0	0	0	1	0	0	1	0	0	0	0	0
4930570G19Rik	103	100	85	144	118	118	144	108	136	71	216	64	127	112	93	68	79	81	100	117	86	78	95	122
4930570N18Rik	0	0	1	0	0	0	0	0	0	0	0	0	0	0	0	0	0	0	0	0	0	0	0	0
4930571K23Rik	0	0	2	0	0	0	12	0	1	11	1	0	0	0	0	0	0	0	0	0	0	0	1	0
4930571N24Rik	0	0	0	0	1	0	0	1	0	0	0	0	0	0	0	0	0	0	0	0	0	0	0	0
4930572K03Rik	0	1	0	0	1	1	1	0	0	0	0	0	0	0	0	0	0	5	0	2	0	0	0	4
4930572O03Rik	0	0	0	0	0	1	5	0	0	0	0	0	0	0	0	0	0	0	0	0	0	0	0	0
4930573C15Rik	0	0	0	0	0	0	2	6	1	0	0	0	0	0	0	0	0	0	0	0	0	1	0	0
4930573I07Rik	0	0	1	1	3	3	1	3	0	1	2	3	2	0	0	1	0	1	1	0	0	3	1	2
4930577H14Rik	0	0	0	0	0	0	1	0	0	1	0	0	0	0	0	2	1	0	0	0	0	0	3	0
4930577N17Rik	13	12	3	3	10	9	7	1	11	8	5	7	7	11	4	3	5	9	2	6	7	1	9	1
4930578C19Rik	0	0	1	0	0	3	7	0	3	1	1	0	3	1	0	0	0	0	0	0	0	1	0	0
4930578G10Rik	1	1	0	1	4	1	1	1	0	0	2	0	0	1	2	1	3	3	1	0	0	1	1	0
4930578I06Rik	0	0	0	0	0	0	1	0	0	0	0	0	0	0	3	0	0	0	0	1	0	1	0	0
4930578I07Rik	0	5	0	1	1	0	0	0	1	0	2	0	2	0	0	0	0	0	0	0	2	0	0	0
4930578M01Rik	57	44	68	88	62	56	59	65	45	82	76	58	59	79	72	56	77	40	92	70	62	44	81	90
4930579C12Rik	2	2	1	0	1	2	15	2	3	1	3	1	0	2	0	0	0	0	0	1	0	0	0	2
4930579D09Rik	0	0	1	0	0	0	0	0	0	1	0	0	0	0	0	0	1	0	0	0	0	0	0	0
4930579F01Rik	0	3	2	0	3	2	14	0	0	4	2	0	0	0	0	1	1	0	0	5	0	2	0	3
4930579G18Rik	66	36	37	43	47	61	40	42	43	39	63	25	60	53	32	59	68	34	53	83	40	28	36	55
4930579G24Rik	133	157	185	160	132	121	112	109	210	167	177	161	193	187	76	95	168	136	127	131	103	110	144	127
4930579H20Rik	0	0	1	0	1	0	12	0	0	1	0	0	0	0	0	0	1	0	0	2	3	3	0	1
4930579K19Rik	37	18	20	24	22	11	21	23	21	30	44	4	22	20	25	23	15	35	18	19	23	31	24	26
4930579M01Rik	0	0	0	0	0	0	4	0	0	2	0	0	0	0	1	0	0	0	0	0	0	0	0	0
4930579O11Rik	0	0	1	1	0	1	1	0	0	0	0	0	0	1	0	0	2	0	0	0	0	1	0	0
4930580E04Rik	0	1	2	0	0	1	9	0	0	0	1	0	0	0	0	0	0	0	0	0	0	0	0	0
4930581F22Rik	24	25	21	38	26	21	22	7	25	37	40	6	39	31	37	26	35	25	20	37	33	27	29	15
4930583I09Rik	1	2	2	1	2	1	5	0	0	0	0	3	0	1	1	0	0	0	0	1	0	2	1	0
4930583K01Rik	5	6	9	4	3	3	6	2	4	3	4	6	3	10	3	3	2	2	11	4	0	7	4	3
4930583P06Rik	0	2	3	1	5	0	4	1	6	3	0	0	4	0	0	2	0	1	1	4	1	3	3	1
4930584F24Rik	0	0	4	0	6	0	3	2	0	5	2	0	0	0	1	1	1	0	0	2	0	1	0	0
4930586N03Rik	0	1	0	0	0	2	6	0	0	3	1	0	0	0	0	0	4	0	0	0	0	0	0	0
4930587A21Rik	0	0	1	0	0	0	0	3	0	1	0	0	0	0	2	0	2	0	0	0	2	0	0	0
4930588G17Rik	3	2	2	0	4	4	4	2	5	5	7	0	12	5	0	0	1	4	3	5	0	0	1	0
4930588K23Rik	0	0	0	0	0	0	3	0	0	0	0	0	1	0	0	0	1	0	0	0	0	0	0	0
4930589L23Rik	0	2	5	3	0	3	3	0	5	4	0	1	1	0	2	1	0	3	0	1	3	2	0	2
4930589O11Rik	57	48	61	34	24	42	43	31	79	44	58	41	44	62	52	23	40	37	43	41	42	39	26	37
4930589P08Rik	4	5	4	0	3	3	4	4	4	0	0	1	4	3	0	9	1	2	3	8	4	1	1	5
4930590H14Rik	0	0	0	0	0	1	0	2	0	1	0	0	0	0	0	1	0	0	1	2	3	0	0	1
4930590J08Rik	139	98	153	110	154	130	173	102	125	103	174	81	204	173	94	128	123	80	108	197	119	149	83	147
4930590L14Rik	0	0	0	0	0	0	1	0	0	0	0	0	0	0	1	0	0	0	0	0	0	0	0	0
4930590L20Rik	0	0	2	0	1	3	1	0	0	0	0	0	0	0	0	0	0	0	0	0	0	0	0	0
4930591A17Rik	0	0	4	2	1	2	6	0	0	6	2	0	0	2	0	1	0	0	0	2	4	3	0	1
4930593A02Rik	1	1	1	1	2	0	8	4	3	0	1	5	1	0	2	1	3	3	2	1	7	1	2	1
4930593C16Rik	1	1	0	0	0	0	3	0	0	0	0	0	0	0	0	0	0	0	0	1	0	0	0	0
4930594C11Rik	6	5	2	1	5	1	14	1	5	7	9	3	18	12	0	1	3	5	4	3	0	0	2	3
4930594M17Rik	0	0	0	3	0	3	1	0	1	3	1	0	0	0	0	0	0	0	0	0	0	0	0	0
4930594M22Rik	10	5	5	1	5	4	30	6	14	12	5	2	5	2	4	8	2	0	3	14	1	8	6	9
4930594O21Rik	0	2	1	0	0	0	7	2	1	1	0	0	0	0	0	0	0	0	0	0	0	0	1	0
4930595D18Rik	5	3	9	4	5	6	2	5	7	1	7	4	12	7	1	5	6	5	2	8	2	12	9	10
4930595M18Rik	1	0	0	0	0	0	0	1	0	5	0	0	0	0	0	0	0	0	0	0	2	0	0	0
4930595O18Rik	0	0	2	0	0	0	6	2	0	4	0	0	0	0	0	0	0	1	0	1	0	2	0	0
4930596D02Rik	0	0	0	0	0	0	6	0	0	1	0	0	0	0	0	0	0	0	0	0	0	0	0	1
4930596I21Rik	1	1	2	4	5	8	5	10	3	5	5	2	4	9	5	7	7	8	6	14	3	10	1	7
4930597A21Rik	0	0	1	0	3	1	11	0	0	0	1	0	2	4	4	0	1	0	3	0	4	0	1	3
4930597L12Rik	0	6	0	4	3	4	5	4	1	5	3	0	15	3	0	2	3	1	0	15	0	4	3	3
4930597O21Rik	2	2	0	0	1	0	1	0	0	1	4	8	0	1	0	3	0	2	0	0	0	3	0	0
4930598A11Rik	0	0	6	0	0	0	4	0	0	0	0	0	2	0	1	0	0	0	0	0	0	1	0	0
4930598F16Rik	0	1	1	0	1	0	1	0	0	0	0	0	0	0	0	0	1	0	0	1	0	0	0	0
4930598N05Rik	3	0	5	4	0	0	10	0	5	0	2	3	0	1	0	0	0	1	0	1	0	0	2	0
4930599A14Rik	0	0	1	3	0	0	1	2	1	0	0	0	1	0	0	0	1	0	2	0	1	0	0	0
4930599N23Rik	1	0	2	3	3	4	3	5	1	0	7	0	3	8	4	9	6	1	2	4	5	6	2	12
4930599N24Rik	0	11	1	3	8	0	3	3	3	4	6	0	3	4	5	1	0	0	3	3	0	2	1	1
4931400O07Rik	0	0	0	0	0	5	4	0	0	0	0	0	0	0	0	0	1	0	0	0	0	0	0	0
4931403E22Rik	0	0	2	1	0	2	0	1	3	1	2	0	0	0	0	0	0	0	2	3	0	3	1	1
4931403G20Rik	10	12	10	6	13	14	33	12	20	3	13	7	11	20	5	5	17	9	3	9	10	3	5	21
4931403M11Rik	1	1	8	1	3	4	0	3	6	4	0	0	0	3	0	0	4	0	0	0	0	0	0	3
4931406B18Rik	1	0	1	2	0	13	20	0	0	6	4	3	2	8	0	0	2	1	0	3	1	6	2	0
4931406C07Rik	309	267	380	411	298	289	287	306	323	230	408	280	242	264	194	258	291	314	193	335	241	245	197	324
4931406G06Rik	3	0	0	0	6	4	1	1	0	2	0	0	1	0	0	2	0	0	1	0	0	0	0	1
4931406P16Rik	2586	3003	2657	2569	2617	3697	2703	2347	2762	2194	2686	1839	2977	3056	1319	1834	3229	2432	2530	2722	2103	2163	2006	2187
4931408C20Rik	0	1	2	0	0	0	11	2	0	0	3	0	0	0	1	0	0	0	0	0	0	1	0	0
4931409K22Rik	25	55	18	51	6	12	27	11	22	22	26	8	43	28	23	15	2	5	25	10	15	21	35	17
4931412I15Rik	4	16	6	0	6	2	11	0	7	2	15	1	4	0	2	3	4	1	9	8	19	11	0	5
4931413I07Rik	0	0	2	1	1	1	5	0	0	0	0	0	2	0	0	0	0	0	0	0	0	3	0	0
4931413K12Rik	14	21	4	16	13	14	20	22	7	9	13	4	29	15	4	15	16	12	4	22	11	12	5	16
4931414P19Rik	351	480	377	347	322	581	392	340	498	357	326	264	370	422	310	226	331	505	613	355	315	227	445	258
4931415C17Rik	94	66	69	75	83	53	79	54	83	79	98	55	51	57	62	60	64	47	36	54	89	31	48	47
4931417E11Rik	0	0	0	2	0	0	0	0	0	3	0	0	0	0	0	0	0	0	1	1	0	0	5	0
4931419H13Rik	0	1	0	0	0	0	1	0	0	0	0	1	0	1	0	0	0	0	0	0	0	0	0	0
4931422A03Rik	79	58	48	50	62	71	62	41	54	60	56	54	77	69	36	59	61	28	61	76	41	58	52	61
4931423N10Rik	5	2	4	5	1	3	8	3	1	3	1	4	0	0	6	2	2	0	0	0	2	4	6	5
4931428F04Rik	8028	9131	9833	9714	6912	8735	6939	6585	10112	7323	8723	6616	8712	8827	4970	6049	6686	7947	6524	6241	7459	5517	7446	5698
4931428L18Rik	0	0	0	0	0	1	3	1	0	0	0	1	0	0	0	0	0	0	0	0	0	1	0	0
4931429L15Rik	8	10	5	5	7	5	14	6	9	6	8	1	11	17	6	5	6	6	6	5	2	9	8	7
4931429P17Rik	0	0	0	1	0	1	2	0	0	1	3	5	0	0	1	2	0	2	0	1	0	1	1	0
4931431B13Rik	0	0	0	0	1	2	0	0	0	0	0	0	2	0	0	0	0	0	0	0	0	0	0	0
4931431C16Rik	2	3	2	0	0	3	6	1	0	2	1	0	0	0	6	1	1	0	0	4	0	0	3	2
4931431F19Rik	0	0	0	0	0	0	0	0	0	0	0	0	0	0	0	0	0	1	0	0	0	1	0	0
4931440F15Rik	39	36	39	29	46	30	48	35	11	26	42	7	28	12	31	44	39	21	24	32	14	39	20	42
4931440J10Rik	2	2	3	0	2	2	4	0	1	2	0	1	6	3	3	1	1	2	4	1	1	3	1	0
4931440P22Rik	127	91	123	114	103	101	123	87	107	106	84	68	112	98	36	96	82	109	97	72	73	63	76	84
4932411E22Rik	1	6	2	1	28	22	14	14	6	2	0	8	2	0	6	4	15	0	31	5	1	5	7	0
4932411K12Rik	0	5	0	3	0	2	8	0	2	8	0	1	1	1	1	0	3	0	0	0	2	2	4	0
4932411N23Rik	2	0	0	0	0	0	4	0	0	1	0	0	0	0	0	0	0	0	0	1	0	0	1	0
4932412D23Rik	8	3	4	2	10	2	42	0	3	14	0	0	3	1	11	2	0	0	15	1	2	8	0	2
4932413F04Rik	4	19	10	7	8	8	8	7	9	5	15	3	4	9	10	4	8	2	8	17	5	5	3	7
4932414J04Rik	4	6	2	6	1	7	2	6	3	6	5	3	0	17	0	5	2	4	0	6	0	6	0	0
4932414N04Rik	2	10	14	6	5	3	20	6	2	6	22	0	13	2	5	0	3	0	6	5	4	16	0	4
4932415D10Rik	0	3	0	2	2	0	3	1	0	4	0	0	0	0	0	3	0	0	0	0	0	3	1	0
4932415M13Rik	0	2	5	5	4	3	12	2	1	1	0	1	0	0	0	0	0	0	1	1	3	1	0	1
4932416K20Rik	10	0	0	2	2	0	12	0	0	0	0	0	0	2	0	0	2	0	0	1	1	4	0	0
4932422M17Rik	9	2	3	9	6	13	8	8	6	9	4	3	8	13	2	6	9	5	8	12	2	9	10	8
4932429P05Rik	1	0	14	1	1	0	7	0	0	4	0	0	0	0	0	1	0	4	0	0	3	0	0	0
4932430I15Rik	0	0	0	0	0	0	0	0	0	0	0	0	0	0	0	0	0	0	0	0	0	0	0	0
4932431L22Rik	0	0	0	0	0	0	0	0	0	0	0	0	0	0	0	0	0	0	0	0	0	0	0	0
4932431P20Rik	3	6	2	6	10	3	31	7	0	3	9	14	0	6	0	5	2	2	1	10	4	3	0	0
4932435O22Rik	6	0	0	4	1	4	6	1	1	1	0	1	0	2	0	0	0	0	0	2	7	1	1	0
4932438A13Rik	3925	4021	5409	3758	4812	3479	3565	3558	5156	3148	5233	3007	3812	3374	2317	3313	4460	2652	1900	4119	2914	3756	2045	3768
4932438H23Rik	7	1	5	0	1	1	10	0	0	2	0	0	0	0	0	2	0	4	0	0	0	1	1	1
4932441J04Rik	134	169	193	166	176	135	138	154	235	127	160	135	130	102	46	101	108	117	102	105	105	74	111	95
4932442E05Rik	18	1	14	27	19	5	19	12	12	2	5	5	24	25	9	21	16	16	13	18	9	17	0	8
4932443I19Rik	13	12	32	32	33	46	42	13	33	21	19	22	18	12	8	9	39	16	29	30	15	21	34	9
4932443L11Rik	67	33	42	41	59	82	61	58	29	56	47	25	75	52	19	44	41	23	50	81	14	31	50	48
4932702P03Rik	8	9	7	3	2	2	5	11	7	2	2	2	3	2	4	5	7	1	4	4	4	10	6	1
4933400A11Rik	2	0	0	0	1	3	10	0	0	2	0	0	0	0	0	0	0	0	0	0	0	1	0	0
4933400C23Rik	10	8	8	11	7	7	10	3	0	4	2	2	0	1	7	5	0	4	5	5	0	1	1	7
4933400F21Rik	28	11	30	5	38	21	26	36	30	20	22	1	17	28	7	20	21	12	1	21	7	24	3	35
4933401B06Rik	0	0	0	0	0	1	6	2	0	1	1	0	0	0	0	0	0	0	0	0	1	0	0	0
4933401H06Rik	0	0	0	1	0	0	2	0	0	1	0	0	2	0	0	0	0	1	0	0	7	1	0	0
4933401J01Rik	2	0	1	0	1	1	7	1	0	2	5	3	0	0	0	0	2	0	0	2	0	2	0	3
4933402C05Rik	0	0	0	0	0	0	0	0	0	0	0	0	0	0	0	0	0	0	0	0	0	0	0	0
4933402C06Rik	0	0	0	3	0	0	0	0	0	0	0	0	0	0	0	0	0	0	0	0	0	0	0	0
4933402D24Rik	2	15	15	6	7	4	18	2	9	26	4	6	15	2	5	8	7	0	4	5	4	4	3	7
4933402E13Rik	0	0	0	0	0	0	0	0	0	0	0	0	0	0	0	0	0	0	0	1	0	0	0	0
4933402J07Rik	1	2	0	0	0	1	2	2	0	3	0	1	0	0	0	0	0	0	0	0	0	0	0	0
4933402J10Rik	0	1	1	0	1	0	15	0	0	0	0	0	0	0	0	0	0	0	1	0	0	2	0	0
4933402N03Rik	0	3	0	0	0	0	10	0	0	0	0	0	0	0	0	1	0	0	0	0	5	0	0	0
4933402N22Rik	0	0	0	0	0	0	0	0	0	0	0	0	0	0	0	0	0	0	0	0	0	0	0	1
4933402P03Rik	0	1	1	1	1	0	3	0	0	0	0	0	0	6	1	1	0	2	0	0	0	3	0	0
4933403L11Rik	0	0	0	0	0	2	2	0	0	0	0	0	0	0	0	3	0	0	0	0	0	0	0	0
4933403O08Rik	6	0	3	0	3	3	3	1	0	2	5	0	2	3	2	11	4	1	5	4	6	3	4	9
4933404I11Rik	1	0	0	0	3	0	3	1	0	0	0	0	0	0	0	0	0	0	0	0	0	0	0	1
4933404K08Rik	1	1	0	1	1	2	6	1	0	2	1	0	0	0	0	0	2	2	0	0	0	1	0	0
4933404O12Rik	108	254	133	133	77	51	93	46	274	136	149	94	112	128	188	29	63	95	246	49	46	74	354	29
4933405D12Rik	1	3	4	0	0	9	13	5	3	1	4	0	5	4	1	3	3	0	4	5	3	3	2	1
4933405E24Rik	0	0	0	0	0	0	1	0	0	0	0	0	0	0	0	0	0	0	0	2	0	0	0	0
4933405L10Rik	21	18	12	18	21	5	25	14	14	20	30	6	19	21	3	5	11	12	25	11	6	14	6	7
4933405O20Rik	0	0	0	0	0	1	4	0	0	1	0	0	0	0	0	0	1	0	0	0	0	2	0	0
4933406C10Rik	6	13	7	9	10	3	17	14	18	7	11	7	21	10	5	11	10	1	8	9	31	12	1	17
4933406D12Rik	0	0	0	0	1	0	1	0	0	0	0	0	1	2	0	0	0	0	0	0	0	1	0	0
4933406F09Rik	2	0	0	1	0	0	0	0	0	0	0	0	0	0	0	0	0	0	0	0	0	0	1	0
4933406G16Rik	0	0	0	2	1	4	10	1	1	5	2	0	0	3	0	2	0	0	0	0	0	0	0	1
4933406I18Rik	11	17	17	24	14	8	20	16	4	21	21	7	12	12	12	9	10	4	6	19	7	8	14	7
4933406J08Rik	3	1	0	3	3	6	4	0	0	3	0	1	0	0	0	0	0	0	0	1	0	3	1	0
4933406J10Rik	1	5	4	0	4	3	16	3	2	8	7	2	0	4	0	5	0	3	6	4	3	2	3	6
4933406K04Rik	1	1	0	0	3	3	13	1	2	3	0	2	1	0	0	2	0	0	0	0	0	0	1	0
4933406L23Rik	0	0	0	4	1	4	0	0	0	0	0	0	0	0	0	0	0	0	0	2	0	0	0	1
4933406M09Rik	1	1	0	3	3	0	1	0	0	1	0	0	0	0	0	0	0	7	0	2	0	1	0	0
4933406P04Rik	32	47	47	47	68	42	50	48	43	70	37	35	62	63	27	39	65	58	72	70	37	23	39	48
4933407E24Rik	0	0	2	0	0	0	0	0	2	2	0	0	0	0	2	0	0	0	0	1	0	3	0	1
4933407I08Rik	8	0	5	1	6	1	6	0	1	3	0	3	5	2	0	1	4	6	0	2	6	4	2	5
4933407K13Rik	593	564	599	686	678	729	525	552	593	536	562	429	745	530	245	573	722	586	711	902	633	453	522	609
4933407L21Rik	32	38	36	18	32	29	58	32	15	39	34	21	45	16	29	24	20	28	33	32	9	19	40	37
4933408A14Rik	0	0	0	0	0	0	0	0	0	0	0	0	0	0	0	0	0	0	0	0	0	0	0	0
4933408B17Rik	60	40	35	29	31	40	71	21	31	17	50	22	55	46	18	29	29	24	20	33	54	73	21	50
4933408J17Rik	10	4	4	8	4	2	14	4	3	18	4	1	2	6	0	1	3	6	1	0	3	6	1	7
4933408N05Rik	2	4	4	6	5	11	13	3	4	5	13	5	5	12	3	2	0	3	2	2	0	5	0	6
4933409D19Rik	1	2	1	3	3	0	13	1	0	2	0	1	0	0	0	0	0	0	0	0	0	3	0	2
4933409G03Rik	1	0	0	1	1	0	7	0	0	1	1	1	0	0	0	0	0	1	0	1	0	2	0	0
4933411E06Rik	4	0	1	3	1	7	6	1	2	1	0	4	0	1	0	0	0	1	0	6	4	1	0	1
4933411G06Rik	0	0	0	0	0	0	8	0	0	0	0	0	0	0	1	0	0	0	0	0	1	0	0	0
4933411K16Rik	1	7	11	0	7	1	4	0	7	0	1	0	0	0	0	0	1	0	0	0	0	0	0	1
4933411O13Rik	11	5	1	5	8	21	7	5	2	2	6	2	1	14	0	5	3	0	1	5	0	6	9	9
4933412A08Rik	3	5	0	0	0	4	6	1	2	7	3	10	1	2	0	3	3	4	0	1	0	2	2	0
4933412E24Rik	0	0	0	0	0	0	1	0	0	0	0	0	0	0	0	0	0	0	0	0	0	0	0	0
4933412L11Rik	9	7	7	7	15	2	13	9	3	3	11	0	5	4	5	5	4	6	2	8	9	13	4	4
4933413C19Rik	1	3	3	1	2	0	12	0	1	6	1	0	0	0	1	0	0	0	9	0	0	0	0	0
4933413G19Rik	8	5	7	0	3	5	6	0	4	0	3	3	4	18	5	0	5	1	7	4	18	17	7	1
4933413J09Rik	28	10	15	7	23	12	40	17	11	16	16	3	26	34	7	10	13	9	13	27	14	20	10	13
4933413L06Rik	6	5	5	3	1	11	15	3	5	3	16	6	9	27	7	4	7	3	2	7	7	7	7	7
4933414I15Rik	1	0	0	0	0	2	4	5	0	0	4	0	0	2	0	0	0	0	1	2	0	5	3	1
4933415A04Rik	124	121	89	119	162	171	145	209	89	102	87	84	138	104	61	132	176	116	144	206	127	82	119	124
4933415F23Rik	0	1	0	0	0	1	1	1	0	0	0	0	0	0	0	0	0	1	0	0	0	0	0	0
4933415J04Rik	0	0	0	0	1	1	3	0	1	3	0	0	1	0	0	0	0	0	1	1	0	1	0	1
4933416C03Rik	0	3	0	2	0	0	1	0	0	0	4	0	0	0	0	0	1	0	5	0	0	0	0	0
4933416E03Rik	0	0	1	0	0	0	1	0	0	0	0	0	1	0	0	0	0	0	0	0	0	0	0	0
4933416E14Rik	1	0	0	0	0	1	2	0	0	6	0	0	0	0	0	0	0	0	0	0	0	0	0	0
4933416I08Rik	3	1	3	0	0	3	3	10	4	3	7	1	0	1	1	0	0	0	0	0	1	2	8	2
4933416M07Rik	0	0	0	0	0	0	0	0	0	1	0	0	0	0	0	0	0	0	0	0	0	0	0	0
4933417A18Rik	0	0	0	0	0	0	1	0	0	1	0	0	0	3	0	0	0	0	0	0	0	0	0	1
4933417C20Rik	28	10	23	28	27	24	20	15	16	25	19	8	38	15	26	37	21	11	11	33	4	20	9	30
4933417D19Rik	90	68	36	75	63	68	61	59	57	77	72	42	42	61	39	45	47	54	42	56	46	48	50	65
4933417E11Rik	0	0	6	2	9	0	1	4	2	2	12	0	0	0	1	3	0	1	3	0	0	4	0	1
4933417G07Rik	1	2	2	1	0	5	1	4	0	0	4	0	6	3	2	1	1	0	0	4	7	1	0	1
4933417O13Rik	1	9	3	4	8	4	9	12	0	3	0	4	0	1	0	0	11	3	8	0	13	2	1	1
4933421A08Rik	0	0	2	0	0	0	4	6	0	0	1	2	0	4	1	0	4	1	0	2	0	0	1	2
4933421I07Rik	0	1	0	4	0	0	5	0	0	0	0	1	0	0	0	0	1	0	0	0	0	6	0	0
4933421O10Rik	284	194	227	281	244	243	243	174	268	191	247	183	222	175	155	165	253	213	238	258	182	216	192	185
4933423L19Rik	3	0	3	1	3	0	4	0	0	2	0	0	0	0	0	0	0	1	0	0	0	0	1	0
4933423P22Rik	38	41	39	35	25	34	90	30	16	22	34	19	28	68	34	42	27	9	25	43	22	48	9	42
4933424G06Rik	12	15	14	11	5	10	10	4	10	15	15	4	5	8	1	12	8	6	5	11	6	9	9	7
4933424H11Rik	1	0	1	0	0	0	5	0	0	0	0	0	0	0	0	0	2	0	2	0	0	0	0	0
4933424L21Rik	0	0	5	0	1	0	5	2	0	1	1	0	2	0	0	0	0	2	0	0	0	0	0	1
4933424M12Rik	6	0	2	5	1	4	6	0	1	2	2	1	1	10	4	5	1	14	2	6	0	4	7	3
4933424N20Rik	0	0	1	0	1	0	1	0	0	0	1	0	0	0	0	0	0	0	0	0	0	0	0	1
4933425D22Rik	6	10	17	16	12	20	22	21	11	18	16	5	24	16	7	11	22	12	14	18	28	18	7	19
4933425L06Rik	9	0	15	3	0	2	13	3	10	7	1	11	1	4	1	1	0	1	0	5	0	0	0	4
4933425M03Rik	0	0	2	0	0	1	5	2	0	1	1	0	0	0	0	2	0	0	0	1	0	0	0	0
4933426K07Rik	0	0	0	3	1	3	14	0	0	0	0	0	0	0	2	3	0	3	0	0	2	1	0	0
4933427D06Rik	7	4	11	0	1	2	7	0	1	1	1	0	0	0	0	1	0	3	0	0	1	0	0	0
4933427D14Rik	2707	2410	2547	2237	2349	3066	2301	2074	2550	2302	2538	1669	3206	2835	1250	2280	2626	2301	2679	3054	2594	2314	2098	2747
4933427E11Rik	5	4	4	2	12	13	8	4	4	11	5	8	15	16	1	3	5	5	1	15	10	3	6	5
4933427E13Rik	1	1	1	0	7	2	20	2	0	2	6	2	0	0	3	1	2	5	0	1	4	2	1	0
4933427G17Rik	2	5	5	10	1	3	10	8	8	7	3	3	3	0	4	0	2	4	1	1	2	5	3	1
4933427G23Rik	15	28	9	16	16	15	34	11	12	18	17	8	12	14	8	19	13	6	7	22	11	17	14	23
4933427I04Rik	0	0	0	0	0	1	2	2	0	2	0	0	0	0	0	0	0	1	4	2	0	0	0	1
4933427I22Rik	1	3	0	0	7	2	2	0	2	2	3	0	0	1	0	0	0	1	1	0	1	0	6	0
4933427J07Rik	1	1	1	0	1	0	1	2	0	1	1	0	1	0	0	0	0	1	2	0	0	0	0	0
4933428C19Rik	0	0	0	1	0	2	3	1	2	0	0	0	0	0	0	0	0	0	1	0	0	0	0	1
4933428G20Rik	35	24	27	35	34	43	30	31	36	34	36	31	28	21	8	53	16	12	27	32	19	19	29	42
4933428M09Rik	0	0	0	0	0	2	3	5	1	1	0	1	0	0	1	0	0	0	1	1	1	0	0	0
4933428P19Rik	6	3	5	5	11	5	11	11	7	9	11	1	7	8	2	4	1	5	10	7	6	2	4	2
4933429H19Rik	17	10	11	16	31	24	11	15	21	14	17	11	15	14	10	23	25	17	12	29	8	19	16	16
4933430H06Rik	0	0	0	0	2	1	9	0	0	2	0	4	5	0	1	1	0	0	0	0	0	0	0	0
4933430H16Rik	0	0	0	0	0	0	0	1	0	1	0	0	0	3	0	0	0	0	3	0	1	0	0	0
4933430I17Rik	78	37	73	71	77	76	120	40	60	65	77	116	48	44	32	70	62	59	71	102	56	99	59	67
4933430L12Rik	0	0	0	0	0	0	0	0	0	0	1	0	0	0	0	0	0	0	0	0	0	0	0	0
4933430M04Rik	2	5	0	1	5	1	5	6	19	12	1	16	2	9	8	5	0	0	1	4	7	6	5	5
4933430N04Rik	10	2	1	1	5	2	29	3	1	1	2	1	8	2	0	1	1	0	1	0	2	7	0	2
4933431C10Rik	5	7	5	3	5	3	10	6	2	3	0	3	7	3	0	1	4	1	4	7	1	15	7	7
4933431E20Rik	332	447	419	349	435	322	319	295	577	302	393	232	293	315	245	175	315	289	266	264	321	205	283	231
4933431G14Rik	12	6	22	6	11	19	22	0	3	25	17	25	25	15	2	7	12	15	13	15	3	16	9	4
4933431K14Rik	73	61	63	98	62	63	64	62	96	72	82	55	44	55	41	55	47	71	84	37	50	38	44	34
4933431K23Rik	8	25	26	35	31	20	26	15	12	30	27	34	2	10	0	3	18	16	5	14	0	6	7	5
4933431M02Rik	0	0	2	0	2	2	1	0	0	0	0	2	0	1	0	0	0	0	1	0	0	2	0	3
4933432K03Rik	4	4	2	1	1	1	5	0	0	1	1	4	2	3	0	2	0	0	1	4	0	0	1	1
4933433F19Rik	1	0	1	1	0	2	9	3	0	1	0	0	2	0	0	0	0	0	0	0	0	0	0	1
4933433G15Rik	5	4	5	3	7	6	11	4	3	1	0	7	0	5	3	3	1	1	1	0	1	0	5	2
4933434E20Rik	5017	4521	4691	5352	5811	6328	5418	5122	5301	6108	5697	3864	6303	4967	2476	4252	5681	5545	5608	7225	6193	4286	4381	5601
4933434M16Rik	0	4	0	0	0	4	13	4	1	8	2	0	0	1	0	0	1	0	0	0	0	18	0	2
4933435F18Rik	0	0	0	0	3	0	1	0	0	3	0	3	0	0	0	1	0	0	0	1	0	0	0	0
4933435G04Rik	0	0	0	3	1	1	2	0	2	0	0	0	0	1	0	0	0	1	0	1	0	0	1	0
4933436E23Rik	3	1	4	8	0	5	2	2	0	1	1	0	1	0	2	1	0	0	1	2	1	4	0	1
4933436F18Rik	0	1	0	0	0	1	4	0	0	2	0	0	2	0	0	1	0	0	0	0	0	0	2	0
4933436H12Rik	0	0	0	1	0	0	1	0	0	2	0	0	0	0	0	0	0	0	0	0	0	0	0	0
4933436I01Rik	0	0	0	0	0	0	2	0	0	0	1	0	0	0	0	0	0	0	0	0	1	1	0	0
4933436I20Rik	3	5	1	4	2	4	13	7	1	3	4	0	1	5	0	3	0	0	2	8	1	2	1	1
4933437G19Rik	8	1	2	0	0	10	1	3	5	0	1	1	4	2	1	1	5	4	0	1	5	1	7	0
4933438A12Rik	0	0	0	0	0	0	2	1	0	1	0	0	0	0	0	0	0	0	0	0	0	0	0	0
4933438B17Rik	1	3	3	3	1	19	14	7	7	1	3	0	4	1	0	8	4	4	5	3	15	1	0	6
4933438K21Rik	2	3	3	0	2	2	20	0	0	5	0	0	0	0	0	3	1	1	1	2	1	7	2	1
4933439C10Rik	980	711	856	863	650	773	654	556	790	812	861	499	774	755	426	619	674	615	678	810	604	562	692	618
4933439J24Rik	0	0	0	4	0	0	9	0	0	0	1	0	0	0	0	0	0	0	0	0	0	0	0	2
4933439K11Rik	46	39	40	31	23	34	40	13	58	39	48	43	31	43	12	29	32	26	21	28	55	48	23	26
4933439N06Rik	0	3	0	3	0	2	10	0	0	4	3	0	0	0	1	2	1	0	0	0	0	1	0	0
4933440J02Rik	0	0	0	0	0	4	0	0	0	0	0	0	0	1	0	0	0	0	0	0	0	0	0	0
4933440M02Rik	1	7	3	2	6	5	27	2	0	6	2	1	9	0	6	10	10	6	8	8	5	0	0	1
4933440N22Rik	14	10	8	12	19	4	12	5	5	2	12	0	7	4	6	6	14	7	6	9	12	9	14	8
5031410I06Rik	0	1	1	0	0	1	0	0	0	0	0	0	0	0	1	0	0	0	0	0	0	0	0	0
5031414D18Rik	0	4	0	2	2	1	15	0	0	5	2	0	0	0	0	0	3	0	0	1	2	3	1	0
5031415H12Rik	3	9	7	6	6	3	14	10	8	1	4	3	5	1	0	7	4	3	2	9	1	6	2	9
5031425E22Rik	2166	2024	2080	2093	2252	2507	2288	1803	2261	2013	2349	1420	2245	2016	1144	1302	2199	2328	2053	1921	2064	1731	1707	1559
5031425F14Rik	3	0	0	2	4	0	3	1	3	0	0	0	1	1	1	0	0	1	0	0	0	0	1	0
5031434C07Rik	0	2	1	0	2	0	11	0	0	0	1	0	0	0	0	0	2	2	0	0	0	0	0	0
5031434O11Rik	208	170	167	196	179	187	188	132	209	162	225	106	170	191	105	176	147	163	155	210	132	110	157	144
5031439G07Rik	7619	13103	9947	9213	11373	9524	8012	7571	16572	8508	10953	7433	10531	9083	4925	5710	10769	9957	8855	7292	9065	6964	8696	6446
5033403F01Rik	17	18	22	28	27	21	39	33	26	22	18	11	50	22	20	22	31	7	38	32	34	7	12	22
5033403H07Rik	1	3	0	0	2	2	2	3	0	2	0	1	0	0	0	0	0	0	0	0	0	0	0	0
5033404E19Rik	0	2	1	0	0	0	4	1	0	1	0	0	0	0	0	0	0	0	0	0	0	2	0	0
5033417F24Rik	74	54	69	73	52	44	30	48	81	62	63	16	42	29	36	28	57	49	24	35	20	50	71	47
5033423K11Rik	1	0	0	0	1	0	0	0	0	0	2	0	0	0	0	0	0	0	0	0	0	2	0	0
5033426O07Rik	0	0	0	0	0	2	1	0	0	0	0	0	0	0	0	0	0	0	0	0	0	0	0	0
5033428I22Rik	3	3	2	0	2	5	10	3	1	2	0	3	9	11	12	14	6	5	4	7	6	14	7	10
5033430I15Rik	98	65	109	91	53	77	66	39	74	84	104	49	74	107	43	81	50	92	54	53	71	93	78	52
5330406M23Rik	0	8	2	0	2	6	13	0	2	0	4	0	8	0	5	3	0	1	0	7	0	7	0	2
5330411J11Rik	2	3	4	2	4	8	7	1	0	0	2	0	0	3	0	0	0	0	3	4	3	3	7	1
5330411O13Rik	7	8	6	6	6	7	1	1	2	2	5	4	10	20	0	5	1	1	0	7	2	1	3	6
5330413D20Rik	0	1	3	0	1	6	5	2	1	0	1	0	0	0	0	0	0	2	0	0	0	3	0	1
5330413P13Rik	37	41	30	17	28	43	36	41	45	42	39	32	22	38	36	30	20	50	58	21	22	37	25	34
5330416C01Rik	83	39	121	68	17	82	112	14	33	71	48	58	22	51	27	54	14	11	13	34	37	30	39	51
5330417C22Rik	485	554	523	617	355	432	446	341	629	453	498	499	374	543	268	291	275	451	377	319	395	338	415	287
5330417H12Rik	0	0	0	0	0	0	0	0	0	0	0	0	0	0	0	0	0	0	0	0	0	0	0	0
5330425B07Rik	0	0	8	0	1	3	2	4	0	0	0	0	0	0	1	0	0	0	0	0	0	0	0	0
5330426L24Rik	0	1	2	0	1	0	3	1	3	0	2	0	0	0	0	0	0	1	0	0	0	0	0	1
5330429C05Rik	0	0	0	0	0	0	0	0	0	0	0	0	0	0	0	0	0	0	0	0	0	0	0	0
5330434G04Rik	1254	1422	1633	1380	1942	1493	1653	1359	1848	1128	1830	991	1761	1326	614	925	1237	1264	1274	1693	1117	1401	972	1294
5330437M03Rik	10	17	10	7	33	5	33	24	12	3	18	3	17	13	2	1	16	13	10	9	0	44	7	18
5330438D12Rik	318	241	178	238	158	300	180	176	185	330	219	188	323	234	132	177	131	127	233	236	152	154	206	187
5330438I03Rik	4	5	3	0	1	0	1	2	0	0	0	1	0	0	4	0	1	0	0	2	0	0	0	0
5330439A09Rik	2	1	3	0	1	4	3	0	3	0	1	4	0	0	0	1	0	0	0	0	0	0	1	1
5330439B14Rik	0	0	0	0	0	0	3	0	1	1	0	0	0	0	0	0	0	0	0	0	0	0	0	0
5330439K02Rik	58	46	90	41	74	49	63	28	75	73	114	38	56	120	42	35	41	61	65	45	29	80	56	49
5430400D12Rik	60	47	67	51	60	119	31	24	44	45	75	40	126	78	23	62	64	34	42	62	61	75	51	53
5430401F13Rik	2	3	2	1	1	0	11	0	0	0	0	0	0	0	0	0	0	0	6	0	0	0	2	0
5430402E10Rik	0	0	0	0	0	0	0	0	0	0	0	0	0	0	0	0	0	0	0	0	0	0	0	0
5430402O13Rik	5	9	13	3	10	23	14	1	17	19	10	9	13	11	5	5	9	10	8	9	17	11	5	9
5430403G16Rik	139	108	133	103	112	100	93	111	115	119	97	98	86	110	67	53	69	66	57	64	78	53	91	85
5430405H02Rik	134	131	138	133	169	207	166	143	187	179	181	114	165	161	110	139	136	195	145	166	139	169	144	162
5430416N02Rik	225	133	144	162	202	259	184	199	183	190	153	175	202	146	68	175	165	158	196	238	162	143	110	135
5430416O09Rik	1	2	0	4	2	2	7	0	0	0	0	0	0	0	0	3	0	0	0	2	0	2	15	0
5430419D17Rik	2	1	2	15	2	3	16	0	1	8	2	3	0	2	1	1	1	1	2	2	1	5	2	1
5430420F09Rik	15	28	25	7	29	15	29	6	8	14	10	9	16	16	7	9	10	11	9	12	5	5	4	15
5430427M07Rik	0	0	0	0	1	0	1	0	0	0	1	0	0	0	0	1	1	0	0	0	0	0	0	0
5430427N15Rik	0	0	1	5	3	2	5	0	4	1	0	0	0	4	6	0	0	1	1	1	11	1	0	2
5430427O19Rik	2	0	2	0	4	9	17	5	0	3	0	0	7	0	0	0	0	4	0	0	2	2	1	1
5430433H01Rik	1	0	0	1	0	0	5	0	0	0	2	0	0	0	0	0	0	0	0	1	0	0	0	0
5430434F05Rik	35	19	10	14	42	29	37	22	14	21	28	12	22	27	20	38	23	12	16	21	27	34	27	15
5430434I15Rik	1	0	0	0	1	0	0	0	0	0	0	0	0	0	0	1	0	0	0	0	0	2	0	0
5530400C23Rik	0	0	0	0	1	0	4	0	0	0	0	0	0	0	0	0	0	0	0	0	0	1	0	0
5530400K19Rik	0	0	3	0	0	2	7	2	1	0	3	8	0	0	2	0	2	0	1	0	8	0	6	2
5530401A14Rik	2	9	4	4	4	2	12	0	2	8	2	4	0	9	0	0	1	0	4	2	1	1	0	2
5530601H04Rik	1976	1335	2032	2095	1592	2050	2054	1873	1469	2082	2251	1669	1778	2189	1244	1431	1956	2418	1832	2108	1889	1887	1645	1579
5730403I07Rik	0	2	1	0	1	3	5	0	3	0	0	1	1	0	0	2	0	0	0	0	0	0	0	2
5730405O15Rik	16	21	24	29	23	18	30	10	36	28	25	11	15	25	11	21	6	1	18	15	18	8	34	11
5730408A14Rik	14	12	10	6	16	14	7	16	10	8	18	11	18	21	2	12	10	4	11	28	27	11	4	12
5730409E04Rik	170	157	338	274	166	123	141	98	248	176	282	179	146	160	127	136	143	174	86	116	187	130	133	141
5730412P04Rik	1	0	2	2	1	1	11	0	2	3	2	1	1	0	0	1	0	1	0	1	0	3	0	0
5730416F02Rik	0	0	0	0	0	0	0	0	2	0	0	0	0	0	0	0	0	0	0	0	0	0	0	0
5730419F03Rik	4	3	3	3	1	2	14	2	1	7	2	0	1	0	0	3	2	9	5	4	2	1	1	0
5730420D15Rik	8	7	13	4	5	8	17	1	5	18	11	3	0	5	6	4	6	9	8	3	8	16	7	4
5730422E09Rik	6	6	3	10	12	1	19	6	10	14	17	2	15	7	10	8	5	16	4	3	11	12	1	1
5730435O14Rik	0	0	0	0	1	0	4	0	0	0	0	0	0	0	0	0	0	0	0	0	0	0	1	1
5730437C11Rik	2	0	0	1	3	0	2	0	0	0	0	0	0	2	0	2	1	1	0	0	4	1	0	0
5730455P16Rik	2915	2727	3421	3358	2509	2583	2852	2734	2989	2527	3275	2428	3016	3010	1976	2133	2482	2829	2246	2944	2641	2285	2596	2423
5730460C07Rik	0	2	0	0	4	1	0	1	0	1	0	0	0	0	0	0	0	0	0	0	0	2	0	0
5730480H06Rik	713	512	608	643	712	608	687	527	708	714	743	392	615	632	343	468	552	565	500	821	500	651	528	676
5730488B01Rik	192	153	152	178	182	197	240	209	110	161	114	124	227	241	175	141	183	187	221	169	106	77	149	145
5730507A11Rik	124	121	123	123	193	136	176	127	97	79	120	73	157	206	55	89	141	77	89	164	76	102	48	106
5730507C01Rik	281	207	376	274	260	257	308	262	172	275	340	223	161	292	173	240	129	213	305	312	122	209	346	276
5730508B09Rik	511	549	594	594	648	746	752	513	916	720	894	469	758	776	383	481	777	891	606	748	967	555	708	604
5730522E02Rik	355	248	306	337	202	247	287	225	216	403	299	181	316	321	119	226	211	205	229	294	206	242	222	232
5730559C18Rik	219	273	254	253	552	375	402	400	472	283	296	204	520	601	260	329	728	827	579	708	507	421	386	412
5730585A16Rik	190	197	131	180	150	121	115	75	94	42	60	60	186	109	68	86	114	71	71	129	64	51	36	64
5730596B20Rik	161	234	138	195	140	113	81	113	62	43	44	28	145	109	96	109	177	96	134	183	50	61	25	67
5830405F06Rik	1	0	0	0	0	0	1	0	0	0	0	0	0	0	0	0	0	0	0	1	2	0	0	0
5830411K02Rik	1	0	5	2	0	8	7	3	3	0	5	4	1	4	5	5	0	2	0	12	2	1	0	0
5830411N06Rik	1	1	0	1	0	3	20	1	1	4	2	0	0	0	0	0	0	0	0	1	3	3	3	0
5830415G21Rik	0	2	1	0	0	1	0	0	0	0	0	0	0	0	0	0	0	0	0	1	0	0	0	0
5830416I19Rik	4	1	1	2	1	0	19	0	0	3	6	0	0	1	0	1	1	1	0	0	0	2	0	0
5830417I10Rik	295	313	292	235	339	348	330	287	301	231	242	174	365	293	129	215	369	212	221	338	269	224	227	244
5830418P13Rik	6	6	6	1	3	4	9	3	0	0	0	0	0	2	4	0	1	1	3	0	0	2	0	0
5830432E09Rik	0	1	1	2	0	1	11	0	3	0	4	1	2	0	0	1	2	2	1	0	0	1	0	1
5830437K03Rik	0	0	1	1	0	0	7	1	0	6	0	1	0	0	0	0	0	0	0	0	0	2	0	1
5830444B04Rik	0	7	11	23	4	4	28	5	14	3	33	2	7	5	0	1	4	14	4	16	4	13	4	4
5830444F18Rik	27	19	20	17	14	24	26	24	9	29	20	12	52	24	24	30	19	7	19	62	30	43	25	25
5830454E08Rik	43	28	51	41	32	35	38	31	39	51	43	24	33	54	50	23	22	43	29	60	36	27	27	36
5830462I19Rik	14	16	26	15	1	13	21	5	17	18	17	12	10	20	8	19	15	17	4	9	10	20	3	10
5830468F06Rik	0	0	0	0	0	0	2	0	0	0	0	0	0	0	0	0	0	0	0	0	0	0	0	0
5830473C10Rik	5	1	0	0	0	1	4	1	7	4	4	0	0	1	0	1	3	1	0	2	0	2	0	1
5830487J09Rik	10	15	16	4	16	28	33	6	9	10	9	2	26	21	8	17	13	13	16	24	2	13	19	6
5930403N24Rik	807	716	898	793	758	767	933	778	808	637	1066	733	660	695	584	562	560	838	775	767	732	656	683	765
5930409G06Rik	152	155	231	133	98	91	128	57	209	199	255	100	105	214	125	87	57	120	96	97	142	158	146	129
5930412G12Rik	35	32	13	11	58	53	37	26	60	48	109	69	359	217	127	151	451	211	138	194	366	325	220	227
5930420M18Rik	213	263	221	227	217	237	234	243	331	226	267	136	258	276	155	156	210	190	219	215	204	172	177	145
5930422O12Rik	15	11	9	4	15	6	28	5	13	3	11	19	10	9	9	5	9	11	4	16	8	16	7	16
5930430L01Rik	34	37	24	29	34	33	85	58	34	23	28	46	36	55	45	47	62	63	77	60	46	39	41	51
5930435M05Rik	3	2	3	7	2	3	17	0	2	5	0	9	0	6	0	7	3	0	2	3	0	0	4	2
6030400A10Rik	73	29	48	17	52	31	48	34	32	39	80	17	34	25	19	41	40	24	27	55	32	37	22	54
6030407O03Rik	1	1	1	1	0	0	5	3	5	0	0	2	4	1	1	1	5	1	0	1	0	2	5	0
6030408B16Rik	20	13	27	20	13	23	7	8	9	18	20	4	10	23	5	18	4	20	23	27	18	22	13	13
6030419C18Rik	359	293	577	409	260	309	206	318	268	346	333	337	290	383	250	425	483	272	287	345	219	368	207	369
6030442E23Rik	2	0	0	1	0	0	0	0	0	0	0	0	0	1	0	0	0	1	0	0	0	0	0	0
6030442K20Rik	18	41	25	25	28	28	21	24	29	29	37	18	38	35	14	26	27	23	26	42	11	27	36	21
6030443J06Rik	47	76	64	108	54	61	64	64	81	84	78	89	74	57	44	62	45	91	25	70	46	48	27	100
6030445D17Rik	3	2	2	0	7	0	1	0	0	2	1	0	0	2	6	0	3	4	2	2	0	3	4	1
6030452D12Rik	0	0	0	1	0	0	2	0	0	0	2	0	0	0	0	0	0	2	0	0	0	1	0	1
6030458C11Rik	2411	2528	2100	2663	2074	2547	2047	1828	2699	2395	2333	1752	2526	2347	1272	2081	1945	2278	2198	2256	2185	1770	2382	1848
6030460B20Rik	5	3	1	3	4	5	10	0	0	2	2	0	0	1	1	6	4	1	0	5	4	6	2	10
6030468B19Rik	4	0	8	0	4	2	9	0	0	0	4	0	1	0	1	1	1	0	0	0	0	11	2	0
6030469F06Rik	0	1	0	0	0	3	1	1	0	0	3	0	0	0	0	0	0	0	0	0	2	0	0	0
6030471H07Rik	0	0	0	0	0	2	4	0	0	0	0	0	0	0	0	0	0	0	1	0	0	0	0	0
6030498E09Rik	3	3	2	0	0	4	5	0	0	1	1	0	0	3	0	0	0	0	0	0	3	0	0	0
6230400D17Rik	41	41	29	38	41	31	32	32	48	64	59	25	44	53	25	36	52	27	46	47	33	36	44	30
6330403A02Rik	157	61	143	103	57	114	127	115	84	174	151	128	197	222	89	139	107	103	108	108	156	126	171	128
6330403K07Rik	15672	17015	19632	18981	17400	15350	15804	15585	22112	18959	21140	14721	13724	15562	11096	11750	13498	18093	15849	17471	15619	12886	15409	13772
6330403L08Rik	57	37	60	37	42	57	37	36	48	71	49	25	84	87	63	68	65	85	74	48	110	47	80	74
6330403N20Rik	14	3	5	0	6	6	16	2	5	12	7	4	13	2	5	4	7	7	8	5	10	4	7	4
6330408A02Rik	860	957	1160	881	938	1027	883	837	1254	886	960	673	1147	961	471	593	852	836	761	836	949	687	738	681
6330409D20Rik	69	126	133	105	122	196	148	129	144	155	138	98	275	132	64	120	168	146	111	181	183	118	97	100
6330410L21Rik	2	1	3	0	2	2	3	0	0	3	0	0	1	0	0	0	0	0	2	2	0	0	0	0
6330415B21Rik	57	103	83	73	128	122	102	75	125	71	73	46	102	82	49	53	87	63	80	99	73	71	83	97
6330416G13Rik	307	228	246	290	212	220	204	136	277	189	207	188	514	513	310	307	414	318	390	290	423	416	526	326
6330418K02Rik	47	32	54	60	39	59	47	38	46	48	50	28	50	33	42	26	42	51	40	65	37	35	55	47
6330419E04Rik	4	12	5	7	9	16	12	11	16	6	11	8	11	2	13	11	7	4	7	8	2	14	4	10
6330549D23Rik	55	40	68	73	60	75	44	52	50	55	60	44	42	36	33	60	49	46	50	79	34	50	36	50
6330562C20Rik	11	11	11	6	11	17	11	8	7	3	7	9	3	8	2	13	5	6	5	13	6	12	11	4
6430500D05Rik	0	0	0	3	0	0	0	0	0	0	0	0	0	0	0	0	0	0	0	0	0	0	0	0
6430503K07Rik	0	0	0	0	0	0	2	1	0	3	0	0	6	12	11	10	1	5	3	8	6	9	14	9
6430511E19Rik	213	189	237	125	288	147	256	128	135	142	250	107	249	186	69	163	231	110	142	243	107	181	117	171
6430531B16Rik	4	15	0	4	7	9	16	7	5	2	4	3	2	10	3	9	3	3	7	6	3	7	4	7
6430548M08Rik	3457	4207	3811	3997	3111	3767	2854	2836	4837	3253	3203	2951	4781	4073	2462	2236	3934	3786	3427	2538	3035	2241	3644	2422
6430550D23Rik	52	86	97	76	61	104	84	82	76	51	53	64	108	42	55	53	48	37	59	60	69	38	43	69
6430562O15Rik	17	18	45	13	27	15	16	12	29	29	38	13	17	29	26	8	31	12	12	24	15	33	9	16
6430571L13Rik	874	676	902	991	556	1019	659	616	649	933	791	686	1074	934	413	862	856	912	819	1055	914	678	808	1042
6430573F11Rik	58	44	74	38	14	41	68	19	24	66	97	22	74	129	48	26	15	40	9	56	24	67	35	60
6430573P05Rik	19	37	56	25	28	57	46	30	29	41	55	15	41	22	17	24	28	21	29	28	30	30	31	26
6430584L05Rik	3	1	5	1	7	2	0	3	0	3	1	2	0	1	4	0	4	0	19	3	0	0	0	4
6430590A07Rik	177	126	164	180	192	151	129	160	147	92	180	165	162	186	78	192	157	57	127	278	80	125	122	209
6430628N08Rik	4	1	4	7	4	4	2	2	4	1	1	0	0	3	6	0	0	0	3	5	0	12	4	0
6430710C18Rik	21	15	14	19	30	38	33	37	10	24	29	12	11	21	8	13	18	17	16	14	4	18	11	23
6530401F13Rik	2	2	0	2	7	2	1	0	6	8	2	1	0	2	5	4	3	0	2	5	2	1	6	2
6530402F18Rik	75	67	55	27	68	41	62	19	72	17	11	18	152	135	158	127	367	196	81	142	149	194	195	140
6530403H02Rik	0	1	6	0	12	0	13	0	11	8	1	1	3	5	0	3	1	1	0	1	5	1	1	1
6530409C15Rik	22	8	14	3	10	21	13	4	20	5	14	8	17	18	8	13	18	22	8	18	21	21	6	9
6530411M01Rik	107	108	103	91	74	56	81	51	75	105	107	68	72	62	54	50	63	36	54	58	63	68	55	74
6530437J22Rik	20	11	9	21	17	16	21	8	13	14	13	6	24	23	6	13	10	16	21	18	11	29	15	13
6720427I07Rik	84	43	55	68	99	78	52	28	41	93	101	39	49	50	43	64	70	43	45	97	69	39	76	89
6720464F23Rik	39	31	46	23	29	26	44	19	27	19	27	23	66	32	9	27	24	22	17	31	18	38	48	34
6720469O03Rik	19	24	24	13	21	22	37	17	21	34	48	16	20	27	18	28	8	5	11	23	16	26	5	24
6720475M21Rik	15	4	9	7	10	4	11	14	8	10	2	12	13	13	1	10	5	3	3	5	7	3	10	8
6720482G16Rik	45	20	42	58	32	81	15	21	19	54	33	31	73	33	9	24	36	10	37	50	17	22	15	35
6720483E21Rik	8	15	23	35	13	8	19	6	26	27	20	3	15	12	7	10	8	2	8	8	3	17	2	12
6720489N17Rik	353	275	299	448	274	324	325	312	408	381	401	266	246	282	247	225	194	239	344	335	214	209	248	286
6820402A03Rik	111	59	72	47	96	106	110	57	40	63	105	53	60	90	37	67	64	25	33	98	77	114	29	114
6820408C15Rik	37	13	50	35	36	42	44	37	47	46	37	19	38	8	14	12	22	36	32	22	34	22	32	31
6820431F20Rik	426	338	360	331	300	434	334	283	354	386	346	278	301	286	106	261	222	243	273	313	195	214	239	246
7330404K18Rik	0	0	0	0	0	0	1	4	0	0	0	2	6	0	0	0	0	0	3	0	0	1	0	0
7330423F06Rik	0	1	1	2	0	2	0	0	0	0	5	0	0	0	0	0	1	0	0	1	0	1	0	0
7420426K07Rik	0	0	0	0	2	0	3	0	0	0	0	0	0	0	0	0	0	0	0	3	0	0	1	0
7420461P10Rik	1	2	4	1	1	4	8	0	0	1	3	2	1	2	1	0	2	3	0	1	0	3	0	1
7530416G11Rik	1	5	1	4	3	0	4	0	2	1	3	0	2	1	0	0	0	4	0	0	0	0	2	1
7530428D23Rik	1	3	0	7	2	0	6	7	1	0	2	0	0	0	0	3	0	5	4	5	1	4	0	2
7630403G23Rik	0	3	0	0	2	0	3	0	0	0	0	0	0	0	0	0	0	0	3	0	0	1	0	0
8030411F24Rik	0	0	0	1	0	0	0	1	0	0	0	0	0	0	0	0	0	0	0	0	0	1	0	0
8030423F21Rik	6	5	5	23	9	25	20	7	11	0	9	15	17	15	5	7	15	19	8	15	23	6	2	6
8030423J24Rik	0	0	1	0	0	0	0	0	0	5	0	0	0	0	0	0	0	0	0	1	0	0	0	0
8030442B05Rik	2	0	0	0	0	0	2	0	0	0	1	0	0	2	0	0	0	0	0	0	0	1	0	1
8030443G20Rik	0	2	2	1	0	0	3	0	0	3	1	1	0	1	3	0	2	0	0	0	0	2	1	1
8030445P17Rik	69	67	78	25	57	52	68	53	51	64	109	49	118	78	45	27	55	41	36	70	13	88	59	73
8030451A03Rik	0	0	2	0	0	0	8	4	1	2	0	0	0	0	0	0	1	0	0	0	0	6	0	0
8030453O22Rik	4	3	7	2	5	15	5	8	5	0	3	1	9	9	0	4	12	0	3	12	0	3	1	5
8030462N17Rik	224	214	254	211	237	230	230	223	260	232	200	191	265	195	115	178	253	164	181	288	254	154	246	264
8030474K03Rik	0	3	1	5	1	0	5	1	0	0	0	6	0	0	4	0	0	0	1	2	0	0	0	2
8030487O14Rik	0	6	2	4	8	4	11	3	13	4	8	0	11	0	13	2	10	5	2	9	7	6	4	3
8430408G22Rik	0	5	0	4	2	1	1	0	5	0	1	6	7	0	7	2	3	3	0	4	0	0	0	3
8430419K02Rik	5	11	15	17	27	14	30	33	15	12	20	8	7	22	15	3	22	16	16	18	32	19	13	15
8430422M14Rik	32	33	25	22	34	23	45	19	33	19	41	9	33	22	12	13	11	19	18	34	8	34	14	24
8430423G03Rik	0	0	0	0	0	0	0	0	0	0	0	1	3	0	0	0	0	0	0	0	1	0	0	0
8430429K09Rik	384	387	390	597	367	495	337	451	465	433	392	390	475	426	293	346	448	411	447	529	527	407	400	394
8430432A02Rik	8	0	17	0	8	9	11	6	15	7	13	2	25	8	12	8	4	7	15	14	9	19	3	13
8430436N08Rik	2	0	0	0	0	7	9	1	0	0	1	0	0	0	0	0	1	0	2	0	0	0	0	2
8430437L04Rik	1	0	2	0	0	0	2	0	0	0	0	0	0	0	5	0	0	0	0	0	0	3	0	0
9030204H09Rik	3	0	3	1	0	2	0	0	2	0	1	0	1	1	1	0	0	0	0	2	0	0	0	0
9030407P20Rik	137	165	148	199	127	147	161	149	203	137	165	143	155	145	98	96	108	168	128	136	174	128	153	137
9030612E09Rik	108	84	90	127	101	114	87	123	94	116	101	102	125	119	65	64	119	112	136	109	136	92	101	90
9030616G12Rik	0	0	0	3	0	0	1	0	1	0	0	0	0	0	0	0	0	0	0	1	0	0	0	0
9030617O03Rik	54	26	90	44	18	29	39	23	32	70	68	25	28	22	26	21	15	13	27	2	18	23	26	12
9030619P08Rik	0	0	0	0	0	1	0	0	0	0	0	0	0	0	1	0	0	0	0	0	0	0	0	0
9030622O22Rik	3	0	1	0	34	17	10	3	2	0	0	0	0	4	12	0	17	1	22	13	0	7	2	2
9030624G23Rik	91	75	120	86	69	87	77	79	89	79	110	68	59	79	36	65	58	76	72	67	47	79	98	62
9030624J02Rik	5285	6395	6582	6555	6122	6526	5676	5176	7973	5963	7260	5019	6727	5950	4109	4661	5933	6093	6074	6368	6095	5064	5901	5888
9130008F23Rik	0	13	8	0	12	1	9	2	9	1	0	1	0	3	4	1	4	3	1	0	6	5	16	2
9130011E15Rik	1822	1876	1850	2032	1834	1911	1616	1470	1873	1774	1588	1436	2271	1777	1115	1428	1632	1596	1737	1830	1647	1199	1605	1544
9130015G15Rik	46	110	14	7	84	68	9	5	56	27	12	1	29	18	46	50	14	5	48	67	10	11	41	41
9130015L21Rik	5	0	0	0	0	6	0	0	1	1	0	0	0	2	0	0	0	0	0	1	0	0	2	0
9130017K11Rik	4	2	1	0	2	2	13	0	7	3	0	1	2	2	3	1	1	4	3	2	0	7	0	1
9130019O22Rik	371	257	249	369	258	358	284	301	339	294	308	187	354	392	145	269	255	253	367	338	214	260	377	274
9130019P16Rik	5	12	19	12	5	8	28	12	10	16	19	13	29	22	9	12	9	7	6	18	5	10	7	24
9130023H24Rik	690	613	714	754	764	1035	804	652	661	713	697	576	1023	773	454	649	824	583	780	885	670	480	596	689
9130024F11Rik	141	73	178	106	104	95	167	97	238	251	339	193	244	302	236	176	101	149	59	204	193	230	204	290
9130204K15Rik	0	0	0	1	1	0	6	0	0	0	0	0	1	1	0	0	0	0	2	1	0	3	1	0
9130204L05Rik	0	0	0	0	0	0	1	0	0	0	0	0	0	0	0	0	0	0	0	0	0	0	0	0
9130208D14Rik	3	5	13	4	6	15	21	11	11	14	14	3	5	14	8	5	8	13	9	7	11	24	7	4
9130213A22Rik	3	1	5	4	5	5	5	1	3	13	2	4	4	9	2	21	8	7	15	3	8	6	3	5
9130221F21Rik	0	0	1	0	0	1	4	0	0	0	2	0	0	0	0	1	0	0	0	2	0	0	0	3
9130221H12Rik	50	35	37	52	50	49	32	46	41	47	41	30	42	44	17	40	23	28	55	43	29	26	26	49
9130227L01Rik	5	1	10	0	2	3	6	11	0	2	16	1	0	3	0	1	2	0	0	1	0	0	2	2
9130230L23Rik	0	15	6	11	3	4	39	3	1	2	1	0	4	3	0	3	1	0	3	0	0	5	0	0
9130230N09Rik	1	0	0	0	0	4	0	0	0	0	0	0	0	1	1	0	1	0	0	0	2	0	2	0
9130401M01Rik	320	228	270	260	171	223	186	181	295	304	244	132	203	224	154	200	147	166	168	215	196	183	220	200
9130409I23Rik	4	6	4	0	0	3	6	2	2	0	0	1	0	6	0	0	0	0	0	0	1	5	0	0
9130409J20Rik	2	0	0	0	0	0	13	0	2	0	0	0	0	0	0	2	0	0	0	0	0	0	0	2
9130410C08Rik	0	0	0	0	1	0	2	0	0	0	0	1	6	6	3	2	4	6	3	1	4	4	1	5
9130604C24Rik	21	30	38	20	26	21	31	30	44	38	22	19	22	25	25	20	20	28	20	24	39	13	21	23
9230009I02Rik	1	0	8	0	0	0	4	0	0	0	0	0	0	0	0	0	0	0	2	1	0	0	0	0
9230019H11Rik	0	0	5	0	1	1	2	0	0	4	0	0	0	0	0	0	1	0	0	0	0	0	0	0
9230020A06Rik	1	0	0	0	4	0	4	0	0	1	0	4	0	2	0	1	0	1	1	1	0	2	4	1
9230102O04Rik	0	0	0	1	0	0	0	0	0	0	0	0	21	16	8	9	5	6	3	4	9	13	6	12
9230104L09Rik	1	1	2	1	4	0	1	0	0	1	1	1	3	4	0	0	1	0	3	1	0	0	0	1
9230104M06Rik	7	4	1	3	3	7	8	3	3	1	6	6	5	1	8	2	5	4	5	9	0	4	3	1
9230105E05Rik	12	7	5	8	11	6	21	15	13	5	15	18	7	20	9	6	5	9	3	11	13	9	18	13
9230106D20Rik	2	0	1	0	0	0	1	0	1	0	0	0	0	0	0	1	0	0	4	0	0	0	3	0
9230109A22Rik	5	7	12	0	0	8	44	1	1	6	11	2	0	1	1	7	0	3	0	4	6	0	7	3
9230110C19Rik	612	581	575	541	512	476	559	334	604	626	665	375	498	587	302	331	502	524	378	492	508	432	461	453
9230110F15Rik	2	2	6	0	1	0	0	0	1	0	0	0	5	0	0	0	2	0	0	0	0	0	0	0
9230111E07Rik	1	0	0	3	1	1	2	0	1	3	1	3	0	0	3	0	1	0	0	1	1	1	0	0
9230112D13Rik	0	2	1	0	0	2	1	0	0	0	0	0	0	0	2	0	0	0	0	0	0	0	0	0
9230112E08Rik	140	182	161	143	140	179	124	122	180	119	190	102	218	181	72	112	154	128	181	117	80	52	61	82
9230113P08Rik	0	1	0	5	0	0	4	2	0	4	1	0	8	1	2	2	0	0	1	2	6	0	0	1
9230114J08Rik	0	0	0	0	0	0	0	0	0	1	0	0	0	0	0	0	0	0	0	0	0	0	0	0
9230114K14Rik	106	105	98	86	123	57	127	103	143	103	151	84	111	63	50	55	75	116	51	85	84	102	90	72
9230116N13Rik	16	18	15	16	15	24	16	5	24	11	10	22	10	15	15	5	3	14	10	21	7	8	11	6
9230117E06Rik	0	0	0	0	0	0	2	0	0	0	0	0	0	0	0	0	0	1	0	0	0	0	0	0
9330020H09Rik	67	36	35	46	51	68	54	26	52	52	55	18	56	46	33	28	42	29	23	53	34	53	11	19
9330102E08Rik	37	40	56	40	67	80	35	53	67	40	41	59	45	43	20	55	65	31	16	50	44	62	48	50
9330104G04Rik	89	117	86	123	102	109	137	86	126	78	107	97	60	157	119	66	23	133	113	94	13	114	88	58
9330111N05Rik	0	3	3	10	7	6	20	3	1	2	0	5	3	2	11	2	7	6	0	5	0	8	2	2
9330118I20Rik	34	29	47	42	23	20	16	19	36	42	28	22	21	32	27	14	15	11	13	29	22	23	24	9
9330121J05Rik	0	1	0	1	2	0	1	3	0	0	3	2	0	0	0	0	5	4	1	2	0	0	3	4
9330132A10Rik	375	240	523	440	229	305	269	204	278	338	393	255	383	309	232	342	212	100	238	252	285	237	338	250
9330136K24Rik	31	27	27	30	18	27	41	17	36	29	39	12	19	30	13	8	19	19	13	25	23	16	20	25
9330151L19Rik	298	203	198	214	125	271	241	154	203	284	245	158	249	374	130	184	133	164	213	204	167	140	181	230
9330154J02Rik	5	12	11	13	16	25	36	10	14	25	16	18	39	41	15	17	10	28	21	20	22	30	15	22
9330154K18Rik	0	0	0	0	1	3	0	0	2	3	0	0	1	0	0	0	0	0	0	0	0	0	1	0
9330158H04Rik	39	60	55	38	33	21	42	9	77	40	47	31	0	8	3	7	5	9	1	5	6	7	10	5
9330159F19Rik	1854	1468	1915	2047	1366	1540	1501	1607	1520	1618	2030	1463	1730	1817	1449	1743	1181	1245	1576	2190	1455	1434	1719	2045
9330159M07Rik	33	15	18	22	15	25	36	11	10	23	20	23	31	13	15	14	15	13	17	30	24	18	19	19
9330160F10Rik	46	33	57	50	48	63	56	46	51	46	70	31	57	43	46	30	44	40	55	35	45	25	50	29
9330161L09Rik	30	66	47	58	52	45	44	73	63	37	35	45	48	52	46	46	53	62	40	66	29	35	25	66
9330162012Rik	18	35	37	29	11	13	31	20	36	23	25	18	21	33	15	23	14	15	17	18	6	18	19	15
9330162B11Rik	97	73	109	20	110	67	138	83	47	36	84	10	60	96	52	55	44	25	42	82	37	76	69	59
9330162G02Rik	640	479	648	493	595	553	616	508	498	496	506	397	546	493	269	493	560	350	390	837	415	473	347	634
9330171B17Rik	11	18	26	14	6	9	3	9	17	9	10	19	11	43	21	17	25	25	13	18	16	17	32	6
9330175E14Rik	2	0	0	0	4	1	15	1	1	0	2	1	0	0	0	0	0	0	0	0	2	2	0	0
9330175M20Rik	11	11	7	25	7	12	13	3	1	7	8	2	2	22	0	5	6	2	3	6	1	15	7	5
9330178D15Rik	11	0	2	0	0	1	12	2	6	2	0	0	0	0	0	0	1	0	1	2	2	0	0	1
9330179D12Rik	1	0	1	0	0	1	4	0	0	3	1	0	0	0	3	2	5	3	3	2	2	1	0	0
9330182L06Rik	1868	2137	2043	2049	1592	1746	1248	1045	2377	1612	1882	1490	1803	1773	885	1285	1332	1239	1282	1126	911	1014	1216	1165
9330182O14Rik	1	0	0	0	0	2	1	0	0	0	0	0	0	1	0	0	0	0	1	0	0	0	0	1
9330185C12Rik	0	0	0	0	0	0	5	0	1	0	4	0	0	0	0	0	0	0	0	0	0	0	0	0
9330198N18Rik	5	5	2	9	2	6	1	9	4	5	7	0	0	2	16	8	2	4	8	4	9	8	9	0
9430002A10Rik	7	0	6	8	4	2	1	5	4	1	6	5	2	7	5	5	4	0	4	9	1	7	1	8
9430007A20Rik	0	0	0	0	0	3	3	0	0	0	0	0	0	0	0	0	0	0	0	0	0	0	0	0
9430007M09Rik	1	1	1	0	0	3	1	0	0	0	0	0	0	1	2	3	1	2	0	0	0	0	0	0
9430015G10Rik	1999	2159	2001	1731	1990	2499	1825	1501	2210	2069	2070	1407	2077	1703	1077	1447	2010	2146	2316	2253	1957	1530	1951	1817
9430016H08Rik	881	732	878	879	878	753	729	661	874	912	807	567	823	829	536	791	791	692	764	961	800	641	682	923
9430018G01Rik	2	4	25	4	3	0	5	3	5	1	5	0	0	2	0	1	5	8	1	2	0	7	6	0
9430020K01Rik	217	243	211	152	182	223	197	204	295	259	192	196	437	470	152	244	385	322	243	307	247	270	319	247
9430021M05Rik	174	158	227	171	71	107	114	98	75	174	159	99	143	220	88	91	69	199	92	81	88	145	144	94
9430024E24Rik	1	4	4	2	6	7	3	1	2	2	7	2	9	0	7	1	6	2	1	3	6	1	1	1
9430025C20Rik	23	19	25	23	27	13	33	13	27	25	31	12	37	23	15	16	14	14	12	29	17	14	17	27
9430034N14Rik	79	69	59	72	70	65	128	72	90	39	52	53	136	91	17	76	103	48	64	61	59	68	58	66
9430037G07Rik	12	10	11	4	13	9	12	1	13	10	14	12	9	12	0	4	10	15	8	9	7	7	1	2
9430037O13Rik	0	1	3	1	3	1	5	3	1	3	0	1	0	3	0	0	2	1	2	0	10	0	0	1
9430038I01Rik	337	272	217	366	273	351	307	264	291	335	315	245	246	271	194	299	264	205	253	384	266	231	307	279
9430041J12Rik	6	16	5	11	12	19	8	12	10	17	8	1	7	10	7	5	14	9	9	15	8	6	6	12
9430053O09Rik	450	267	305	416	338	351	321	393	277	336	408	233	380	261	182	342	238	223	332	466	246	410	338	463
9430060I03Rik	57	41	50	60	44	46	35	37	53	68	71	45	57	76	35	43	29	57	46	46	29	38	44	53
9430062P05Rik	10	10	13	4	7	22	26	7	6	6	21	14	17	14	17	10	10	24	29	10	1	22	14	17
9430064I24Rik	5	5	6	2	3	3	7	3	9	2	7	1	4	4	1	3	3	7	2	8	7	2	9	6
9430065F17Rik	22	10	15	25	6	26	14	36	19	43	21	26	35	7	7	18	11	23	4	21	25	4	9	21
9430069I07Rik	0	0	1	0	0	0	0	0	1	0	0	1	0	0	0	0	1	0	0	0	0	0	0	0
9430073C21Rik	0	1	0	0	0	0	2	0	0	0	0	0	0	0	0	0	0	0	0	2	0	0	0	0
9430076C15Rik	919	668	1039	711	1672	864	1068	769	2796	1350	1787	933	458	397	399	280	625	457	265	438	490	899	493	623
9430083B18Rik	0	0	1	0	4	3	9	0	5	1	0	5	1	0	0	0	5	0	0	5	2	3	0	1
9430087B13Rik	0	0	2	0	8	0	9	5	3	5	3	0	5	4	3	0	2	3	3	1	0	5	0	4
9430087J23Rik	25	4	3	5	11	27	22	7	9	9	10	6	17	1	3	17	9	1	11	13	1	11	7	12
9430091E24Rik	58	68	55	54	55	75	57	61	88	70	52	46	87	47	31	73	65	53	65	63	61	46	42	56
9430092D12Rik	51	35	47	32	53	42	41	33	34	36	42	46	48	29	37	51	34	55	37	76	44	54	32	69
9430093N23Rik	0	0	0	1	0	4	6	0	0	0	0	0	0	0	0	0	0	0	1	0	2	0	1	0
9430097D07Rik	6	7	9	2	8	1	4	15	8	8	11	2	5	4	1	7	5	2	5	5	1	10	7	5
9430098F02Rik	0	0	0	0	0	0	0	0	0	0	0	0	0	0	0	0	0	0	0	0	0	0	0	0
9530002B09Rik	0	0	0	0	0	0	8	0	0	0	0	0	0	0	0	0	0	0	0	0	0	0	0	0
9530003J23Rik	9	2	0	2	1	4	6	0	6	1	0	1	2	0	3	0	2	0	0	1	3	3	3	0
9530003O04Rik	14	19	18	9	13	21	9	7	13	17	25	16	8	4	12	6	12	3	10	14	14	13	8	11
9530013L04Rik	0	0	0	0	1	0	3	0	0	0	1	0	0	0	0	1	1	0	0	0	0	1	0	0
9530018H14Rik	1	0	0	0	2	4	2	1	0	0	0	0	25	24	13	17	2	16	18	19	1	11	4	11
9530022L04Rik	1	1	0	0	0	1	0	2	0	1	0	2	0	1	0	0	0	1	1	1	1	1	0	2
9530026F06Rik	70	24	64	46	8	39	44	15	18	98	94	46	19	35	22	34	17	17	36	16	25	35	94	49
9530026P05Rik	15	11	10	17	18	10	23	2	100	19	50	15	3	4	3	1	0	1	9	3	13	21	12	6
9530027J09Rik	24	19	15	21	8	17	21	21	10	14	22	16	12	18	16	6	25	10	17	21	6	10	13	29
9530034A14Rik	0	0	0	0	0	2	2	0	0	0	0	0	0	0	0	0	0	0	0	0	0	1	0	0
9530034E10Rik	14	6	17	17	12	22	10	4	11	8	10	6	27	23	12	16	13	9	6	23	10	16	9	13
9530036M11Rik	71	44	62	83	9	17	29	9	18	27	33	32	55	60	22	49	9	5	7	11	14	22	42	23
9530036O11Rik	0	1	0	6	2	0	4	2	1	0	2	0	1	2	0	2	0	0	0	0	3	0	0	2
9530046B11Rik	51	19	48	43	35	44	44	32	40	25	43	15	33	61	17	39	52	36	16	48	27	46	16	26
9530051G07Rik	78	74	63	64	59	86	84	39	86	63	47	45	49	54	38	46	66	87	52	61	76	67	50	57
9530052C20Rik	0	3	3	2	4	1	9	9	2	4	5	5	1	2	0	0	5	0	0	2	2	2	1	3
9530052E02Rik	19	14	10	3	5	8	8	8	9	6	5	12	6	9	1	3	6	3	7	12	1	11	4	5
9530053A07Rik	7	8	10	3	15	6	39	8	12	9	21	10	8	8	9	7	23	11	9	11	5	11	12	4
9530056K15Rik	0	1	4	8	5	6	3	3	0	4	3	0	1	3	0	3	3	2	0	0	3	2	2	0
9530059O14Rik	614	553	534	572	468	553	446	397	475	454	702	368	925	748	251	489	468	262	439	481	457	630	380	425
9530062K07Rik	22	31	21	33	20	13	14	13	31	24	48	30	24	12	7	6	23	14	14	21	24	15	19	16
9530068E07Rik	6491	6141	7507	7103	7392	6754	5743	5758	7752	7169	7612	5020	7154	6365	4302	5386	7623	6463	6883	8121	6926	5527	6105	6659
9530077C05Rik	329	201	261	293	156	295	199	222	235	379	237	171	232	234	230	269	169	129	195	297	197	141	218	243
9530078K11Rik	9	0	5	4	1	0	6	1	1	0	2	3	0	0	16	4	4	2	3	3	0	8	5	2
9530080O11Rik	33	34	30	44	20	25	22	17	24	39	27	4	38	19	7	10	12	16	6	28	28	7	11	18
9530082P21Rik	3457	3573	3620	4166	3192	3905	3204	3384	3864	3279	3311	2710	4045	3405	2359	2684	3210	3682	3830	3654	3563	2367	3513	2941
[truncated: 46,398 more rows]
