# Supplementary material for: PRC1 sustains the integrity of neural fate in the absence of PRC2 function
Source: eLife. 2022 Jan 7;11:e72769. doi: 10.7554/eLife.72769 (PMC8765755; doi:10.7554/eLife.72769)
Supplement: Supplementary file 2. [file elife-72769-supp2.xlsx]

## Sheet: CounTable
gene	Control-Brachial_16-B6_S1-counts.txt	Control-Brachial_19-B4_S4-counts.txt	Control-Lumber_16-L6_S3-counts.txt	Control-Lumber_19-L4_S6-counts.txt	Control-Thoracic_16-T6_S2-counts.txt	Control-Thoracic_19-T4_S5-counts.txt	Mutant-Brachial_14-B4_S7-counts.txt	Mutant-Brachial_16-B4_S10-counts.txt	Mutant-Lumber_14-L4_S9-counts.txt	Mutant-Lumber_16-L4_S12-counts.txt	Mutant-Thoracic_14-T4_S8-counts.txt	Mutant-Thoracic_16-T2_S11-counts.txt
1:3398993-3400081|95.02|MACS_peak_1	73	70	47	101	42	55	212	231	61	110	140	82
1:3470446-3471016|71.42|MACS_peak_1	9	24	0	95	8	96	0	14	8	25	0	13
1:3512576-3513260|95.86|MACS_peak_2	72	124	68	125	48	163	48	112	38	71	70	35
1:3579477-3579935|54.90|MACS_peak_3	22	21	6	44	8	64	9	31	0	17	14	11
1:3580792-3581495|83.77|MACS_peak_4	25	32	15	39	17	130	26	23	3	14	26	17
1:3640522-3641275|88.75|MACS_peak_5	23	66	12	97	20	184	52	50	25	37	47	45
1:3670287-3672788|123.59|MACS_peak_1	5719	7897	7312	8701	8695	7949	5902	9033	4455	7388	9705	4706
1:3841797-3842850|349.25|MACS_peak_6	97	279	72	345	65	586	94	130	46	71	113	78
1:3913482-3914101|70.58|MACS_peak_1	33	115	32	97	23	158	35	35	26	23	51	30
1:4356818-4357471|107.99|MACS_peak_7	5	54	5	57	5	126	8	15	11	19	9	19
1:4362747-4363344|58.30|MACS_peak_8	13	26	17	65	9	85	7	19	8	17	14	30
1:4520216-4520991|292.16|MACS_peak_9	20	34	37	183	36	265	18	22	21	42	23	49
1:4807288-4808336|126.45|MACS_peak_2	1061	1565	1092	1867	1267	1726	1005	1561	817	1097	1674	774
1:4857252-4858721|140.57|MACS_peak_3	2125	3563	2583	3883	2921	3509	2002	3116	1614	2527	3149	1657
1:5082694-5083727|109.47|MACS_peak_4	917	1578	1038	1490	1080	1517	916	1379	680	891	1507	696
1:5232572-5233325|95.19|MACS_peak_2	114	87	84	184	72	109	179	261	60	140	197	134
1:5587920-5589262|66.23|MACS_peak_5	968	1446	927	1644	1028	1603	1058	1300	725	1052	1697	626
1:5955120-5955851|142.89|MACS_peak_10	13	58	12	122	20	163	7	27	27	32	12	19
1:6282200-6283286|94.91|MACS_peak_11	103	178	66	217	91	217	125	137	75	75	110	65
1:6382583-6383751|83.34|MACS_peak_6	1141	1506	1081	1687	1287	1689	1119	1476	852	991	2028	729
1:6729081-6730232|146.33|MACS_peak_3	268	341	212	477	166	530	426	643	203	268	502	245
1:6733491-6735908|60.77|MACS_peak_12	394	770	303	1162	272	1061	371	879	248	465	483	394
1:6757420-6757938|127.25|MACS_peak_4	18	23	12	44	11	36	103	115	19	35	51	65
1:6759296-6759924|156.13|MACS_peak_13	11	34	8	70	10	148	4	15	4	20	10	15
1:6760235-6761834|128.95|MACS_peak_14	191	305	158	340	131	492	139	197	60	168	189	147
1:6767634-6768370|50.44|MACS_peak_15	109	131	105	266	49	173	81	142	53	106	81	69
1:6800028-6800496|55.83|MACS_peak_16	12	27	2	71	17	83	49	35	13	22	20	15
1:7088144-7089685|98.26|MACS_peak_7	4675	5466	6264	6184	6800	5604	5771	7229	4236	5946	8880	3854
1:7206037-7207250|66.44|MACS_peak_17	220	254	127	361	214	430	171	198	106	184	265	169
1:7318814-7319700|100.32|MACS_peak_5	72	58	23	86	26	51	127	188	35	38	87	60
1:7493960-7494605|86.74|MACS_peak_18	22	91	7	80	2	120	10	14	12	14	9	21
1:7678387-7678978|55.44|MACS_peak_19	7	42	13	110	18	88	14	30	12	36	9	27
1:7777011-7779210|88.62|MACS_peak_20	274	260	152	511	195	759	183	374	116	181	283	171
1:8410409-8411398|73.24|MACS_peak_2	69	224	78	242	53	291	59	69	49	48	112	77
1:8410427-8411376|84.77|MACS_peak_21	69	218	74	239	52	287	58	69	49	48	112	77
1:8861199-8861878|61.17|MACS_peak_3	15	107	4	56	24	95	9	29	10	17	18	14
1:8861413-8861843|69.66|MACS_peak_22	8	82	2	39	19	71	9	26	8	10	15	9
1:9148755-9149560|118.87|MACS_peak_23	23	90	21	152	8	196	43	29	38	13	60	26
1:9288717-9289163|55.60|MACS_peak_6	14	28	11	47	3	59	41	68	19	25	46	23
1:9298298-9300338|61.06|MACS_peak_8	1322	2458	1286	2425	1403	2198	1187	1842	748	1288	1860	1008
1:9544835-9546524|86.75|MACS_peak_9	2332	3260	2600	4077	2715	3390	2326	3197	1732	2525	3409	1637
1:9563559-9565030|256.64|MACS_peak_24	87	214	88	389	84	687	88	158	101	123	143	119
1:9578190-9579405|280.92|MACS_peak_25	55	173	83	486	93	695	58	147	80	155	144	127
1:9583729-9584577|185.86|MACS_peak_26	104	294	46	212	54	413	154	143	60	92	126	69
1:9607661-9608354|132.53|MACS_peak_27	6	12	21	67	20	127	16	34	9	22	21	23
1:9621308-9622022|86.86|MACS_peak_28	60	50	35	127	49	147	44	50	34	62	36	59
1:9622198-9623340|79.44|MACS_peak_7	197	157	71	258	183	284	326	379	126	98	344	178
1:9760917-9761918|164.26|MACS_peak_29	32	145	18	98	21	205	14	4	18	12	21	30
1:9761147-9761832|69.61|MACS_peak_4	28	108	10	73	15	157	11	4	11	7	16	23
1:9805313-9806175|114.25|MACS_peak_30	34	113	21	124	17	217	26	34	51	35	52	41
1:9908491-9908964|59.28|MACS_peak_10	224	204	137	231	159	181	199	220	167	130	323	133
1:9943570-9944457|82.15|MACS_peak_11	756	1438	847	1588	927	1369	987	1258	674	894	1446	633
1:9988263-9989433|215.50|MACS_peak_31	89	309	105	402	118	683	116	273	89	130	181	141
1:10039314-10040456|104.45|MACS_peak_12	1424	2588	2014	3006	2113	2561	1471	2222	1121	2072	2522	1077
1:10210772-10211605|154.66|MACS_peak_32	31	123	26	245	29	343	38	62	44	50	87	53
1:10231489-10233631|65.10|MACS_peak_13	1996	3869	2829	4636	2983	3789	2050	3186	1611	2812	3459	1751
1:10247139-10247531|74.74|MACS_peak_8	23	7	13	21	17	10	29	65	24	18	28	18
1:10377126-10378830|79.98|MACS_peak_33	235	256	151	419	145	623	229	408	126	221	259	177
1:10403499-10404155|58.28|MACS_peak_1	82	41	26	55	53	48	69	81	33	55	116	73
1:10460391-10461110|174.53|MACS_peak_34	34	94	17	111	16	210	19	43	17	23	35	20
1:10682524-10683165|64.38|MACS_peak_35	33	37	31	72	22	109	29	17	13	22	18	42
1:10699416-10700594|219.44|MACS_peak_36	62	80	45	331	28	359	46	69	31	73	80	62
1:10699571-10700502|61.49|MACS_peak_1	50	75	34	300	25	332	40	62	25	59	79	54
1:10703070-10703766|149.26|MACS_peak_37	51	108	35	191	36	275	37	100	48	47	78	52
1:10706905-10707872|124.51|MACS_peak_38	58	132	41	175	28	274	73	103	53	69	64	73
1:10722235-10722821|62.30|MACS_peak_39	15	47	28	59	15	124	21	47	17	34	27	26
1:10756894-10757878|71.55|MACS_peak_40	91	237	79	265	100	365	159	272	104	88	182	100
1:10841858-10842335|59.71|MACS_peak_41	2	66	17	92	9	80	12	37	1	34	8	19
1:10851545-10852012|53.22|MACS_peak_42	27	25	21	37	23	62	16	18	17	15	18	17
1:11155052-11156104|117.51|MACS_peak_43	55	208	56	331	49	457	128	185	57	71	171	101
1:11252684-11253400|75.69|MACS_peak_5	27	119	22	79	8	181	9	20	8	23	26	22
1:11252708-11254479|473.47|MACS_peak_44	42	347	29	276	13	548	55	66	40	35	87	44
1:11253651-11254420|86.99|MACS_peak_6	12	198	7	171	3	314	45	34	28	6	52	16
1:11322659-11323296|75.39|MACS_peak_45	17	47	5	76	11	114	9	10	11	16	12	13
1:11348094-11348785|153.87|MACS_peak_46	17	36	9	79	15	153	9	10	7	13	6	25
1:11405534-11406489|103.87|MACS_peak_9	107	94	42	83	34	112	186	266	54	93	150	96
1:11413567-11414927|53.03|MACS_peak_14	1284	2131	1469	2229	1485	2035	1355	1722	938	1389	2180	1009
1:11657608-11658227|60.87|MACS_peak_47	64	95	44	143	32	129	64	62	33	48	44	38
1:12000487-12001077|83.82|MACS_peak_48	34	111	18	83	8	102	23	42	14	29	21	23
1:12000503-12001045|53.29|MACS_peak_7	33	110	16	83	8	102	19	42	13	26	21	23
1:12305931-12306551|142.10|MACS_peak_49	14	37	15	62	10	128	4	22	12	12	6	16
1:12409880-12410836|128.62|MACS_peak_10	163	119	93	152	101	99	241	361	50	79	159	99
1:12614962-12615466|50.68|MACS_peak_50	42	102	21	63	20	84	30	69	17	16	18	15
1:12776762-12777405|54.23|MACS_peak_51	33	57	30	82	22	109	24	80	18	67	31	46
1:12794849-12795805|92.32|MACS_peak_52	50	61	52	170	63	206	32	56	45	79	65	75
1:12834034-12837664|295.87|MACS_peak_53	517	1274	391	1703	400	2077	462	785	373	523	669	512
1:13081151-13081798|162.67|MACS_peak_54	11	62	11	74	33	131	18	40	24	37	19	28
1:13097361-13098281|219.30|MACS_peak_55	47	203	56	179	42	208	41	96	29	46	34	40
1:13111523-13112329|79.80|MACS_peak_56	52	109	72	170	59	171	55	105	25	76	73	66
1:13126181-13129053|71.48|MACS_peak_57	202	531	252	934	254	667	189	349	142	255	263	276
1:13134126-13134915|53.15|MACS_peak_58	67	125	48	236	70	215	77	118	62	74	110	54
1:13171864-13173170|319.52|MACS_peak_59	23	61	38	205	58	291	17	47	18	54	25	56
1:13194697-13195774|66.90|MACS_peak_60	74	127	49	223	58	220	55	120	27	51	71	70
1:13195942-13197110|52.14|MACS_peak_61	180	249	131	247	186	279	134	307	89	94	214	115
1:13203494-13204098|75.87|MACS_peak_62	13	47	14	77	21	93	38	33	27	18	19	37
1:13230492-13231914|429.13|MACS_peak_63	82	128	49	207	58	398	64	106	47	71	41	70
1:13244464-13245856|110.26|MACS_peak_64	148	426	182	630	184	727	129	225	127	167	180	184
1:13289761-13290696|108.21|MACS_peak_65	91	157	93	297	112	367	56	142	80	132	116	123
1:13293853-13294587|73.30|MACS_peak_66	22	40	8	94	17	138	36	41	26	36	15	28
1:13303168-13304416|93.42|MACS_peak_67	154	250	88	257	112	330	86	196	82	149	156	94
1:13333295-13334159|98.79|MACS_peak_68	34	112	30	145	24	198	34	64	36	40	55	45
1:13371958-13374940|322.72|MACS_peak_15	5791	8274	7519	9967	8438	8086	5889	9160	4373	8026	9846	4905
1:13416226-13416950|248.08|MACS_peak_69	11	150	9	100	10	245	25	37	33	22	37	25
1:13584031-13584842|141.24|MACS_peak_70	23	78	26	79	25	162	6	37	29	23	17	39
1:13935886-13936605|123.08|MACS_peak_71	51	110	29	153	13	193	26	59	20	50	47	24
1:13990714-13991835|116.59|MACS_peak_72	31	58	20	133	19	195	10	59	30	20	29	36
1:14106116-14106717|61.54|MACS_peak_73	24	65	14	18	12	96	19	24	12	15	15	16
1:14287749-14288360|53.45|MACS_peak_8	39	81	26	59	18	66	24	26	38	20	35	54
1:14348355-14349081|100.89|MACS_peak_74	16	86	18	147	8	149	39	51	16	37	10	24
1:14351720-14352503|165.04|MACS_peak_75	2	132	10	62	6	168	18	21	14	13	8	6
1:14359824-14360321|72.42|MACS_peak_76	15	51	32	48	14	81	11	24	20	17	17	29
1:14429342-14429769|68.27|MACS_peak_11	45	15	14	16	16	16	83	81	9	14	40	50
1:14487340-14488137|52.11|MACS_peak_77	53	63	38	78	19	217	112	158	21	57	81	45
1:14487439-14488020|68.87|MACS_peak_12	42	51	32	69	16	188	81	130	19	35	60	33
1:14513390-14514248|159.33|MACS_peak_16	149	261	305	296	186	163	325	225	262	228	388	156
1:14570069-14571040|164.91|MACS_peak_13	238	386	277	692	198	783	496	704	292	485	560	258
1:14584504-14585411|353.04|MACS_peak_78	38	121	35	146	47	331	30	50	29	41	24	36
1:14623337-14623567|57.92|MACS_peak_14	10	2	13	25	6	20	18	34	9	7	26	3
1:14626710-14627418|56.04|MACS_peak_79	42	45	10	68	14	118	52	43	10	20	36	30
1:14630039-14630803|72.18|MACS_peak_80	45	73	85	128	62	151	35	111	47	70	77	55
1:14635515-14636768|89.70|MACS_peak_81	69	97	81	202	81	248	98	110	59	103	85	97
1:14669224-14669836|76.00|MACS_peak_82	14	33	7	41	10	117	10	6	13	16	7	14
1:14686992-14687683|148.56|MACS_peak_83	18	52	19	110	17	165	9	24	11	40	21	27
1:14842158-14843213|62.37|MACS_peak_17	291	585	357	727	319	1129	344	607	333	479	482	322
1:15296364-15296978|109.10|MACS_peak_9	14	120	14	26	6	29	6	17	8	13	6	29
1:15307414-15307944|66.44|MACS_peak_84	23	69	29	74	18	106	39	29	12	19	11	24
1:15320482-15321139|198.42|MACS_peak_85	14	80	14	86	6	195	6	11	7	12	17	24
1:15426712-15427188|56.66|MACS_peak_10	17	73	8	54	3	80	10	19	21	21	11	19
1:15443167-15443765|74.48|MACS_peak_86	6	74	13	72	12	109	3	17	13	14	14	20
1:15451296-15452711|58.99|MACS_peak_87	61	116	104	269	92	321	93	173	69	125	125	100
1:15490091-15490735|209.03|MACS_peak_88	0	65	10	95	2	182	10	8	16	12	8	27
1:15508308-15509022|107.94|MACS_peak_89	19	24	14	95	24	114	15	26	16	21	10	43
1:15609968-15611015|151.19|MACS_peak_90	52	51	28	97	42	190	70	52	30	53	50	36
1:15643961-15645476|92.16|MACS_peak_91	154	210	202	483	186	431	122	232	100	188	246	154
1:15805188-15806493|96.98|MACS_peak_18	1885	3010	2089	3327	2246	2934	2116	2868	1403	2070	3123	1436
1:15892107-15893200|73.42|MACS_peak_19	596	895	599	989	650	940	551	652	386	610	1128	385
1:15978795-15980028|81.76|MACS_peak_2	70	560	63	540	62	900	134	147	69	113	117	57
1:15978857-15980117|745.20|MACS_peak_92	69	563	65	548	61	911	134	147	71	119	117	54
1:15978915-15980072|66.82|MACS_peak_11	68	553	59	534	58	897	132	146	69	113	116	51
1:15993500-15994448|57.78|MACS_peak_93	100	118	67	160	40	220	92	107	53	69	132	79
1:16103793-16106634|69.38|MACS_peak_20	3672	5726	4590	7125	5528	5969	3620	5991	2820	4901	5899	3225
1:16172755-16173730|51.02|MACS_peak_94	133	226	89	243	93	303	92	193	55	76	169	92
1:16215881-16216463|76.75|MACS_peak_21	107	160	63	104	60	132	81	122	94	60	75	50
1:16217817-16218671|58.85|MACS_peak_95	29	69	26	99	28	162	8	38	18	46	44	46
1:16229268-16230384|311.54|MACS_peak_96	148	377	163	479	124	726	187	308	111	223	191	119
1:16234891-16235508|79.32|MACS_peak_97	6	34	13	75	12	128	8	26	12	33	17	18
1:16248640-16249585|81.99|MACS_peak_98	81	120	88	178	46	237	60	105	49	83	81	75
1:16268283-16269870|176.90|MACS_peak_99	120	257	70	306	108	374	136	213	76	110	136	113
1:16518476-16520290|167.63|MACS_peak_22	2128	3189	2449	3620	2633	3244	2109	3213	1609	2462	3463	1386
1:16656342-16657706|53.37|MACS_peak_23	1523	2717	1911	2861	1899	2709	1732	2366	1340	1691	2447	1148
1:16664871-16665839|71.02|MACS_peak_24	632	1136	681	1221	767	1222	644	878	462	647	1007	370
1:17001702-17002333|71.63|MACS_peak_100	32	57	22	102	12	124	29	33	24	16	32	32
1:17023176-17023838|96.60|MACS_peak_101	28	78	14	48	4	142	13	12	6	16	10	9
1:17096731-17098399|53.44|MACS_peak_25	1285	2243	1371	2622	1612	2548	1823	2316	1045	1556	2770	1157
1:17145245-17145872|151.04|MACS_peak_26	435	776	444	699	478	716	484	584	404	420	749	304
1:17148730-17149502|72.34|MACS_peak_102	16	18	11	91	19	161	7	13	24	20	6	36
1:17840562-17841096|61.46|MACS_peak_103	13	34	9	40	16	84	10	20	14	17	6	21
1:18105193-18106496|61.06|MACS_peak_15	405	301	132	372	150	205	356	607	66	122	278	188
1:18190672-18192327|106.81|MACS_peak_104	177	582	69	318	91	519	243	296	55	90	206	75
1:18386004-18386623|96.95|MACS_peak_105	24	91	11	58	3	147	12	22	13	10	26	5
1:18535557-18536692|83.63|MACS_peak_12	72	173	49	54	47	50	20	66	22	47	33	32
1:19087820-19088676|94.26|MACS_peak_106	49	133	50	147	37	196	71	128	24	55	58	52
1:19178739-19179509|52.22|MACS_peak_107	92	95	70	146	57	152	84	90	46	59	99	42
1:19211710-19212336|61.97|MACS_peak_16	73	78	46	126	41	74	119	140	44	92	82	72
1:19231307-19231913|51.55|MACS_peak_17	55	66	60	132	87	80	107	156	72	112	169	83
1:19288224-19289299|263.60|MACS_peak_108	58	110	21	184	29	299	31	86	21	86	39	46
1:19292591-19293532|252.81|MACS_peak_109	37	195	33	222	20	308	82	113	15	38	45	39
1:19292687-19293524|67.92|MACS_peak_3	37	192	32	217	19	305	82	108	14	36	44	36
1:19323740-19324059|72.13|MACS_peak_18	6	12	5	16	7	24	61	60	8	17	48	28
1:19615400-19616744|424.04|MACS_peak_110	83	352	45	298	44	604	78	163	19	35	91	66
1:19615685-19616438|88.23|MACS_peak_4	69	315	29	240	32	514	68	147	12	25	75	44
1:19673938-19674788|98.69|MACS_peak_19	76	68	44	80	35	63	86	203	43	79	63	62
1:19981183-19982243|214.85|MACS_peak_111	45	180	44	209	23	216	28	70	21	71	34	27
1:19983276-19984291|65.45|MACS_peak_20	76	112	43	85	23	74	131	228	34	53	103	50
1:20018208-20018648|88.36|MACS_peak_2	75	57	31	33	18	16	72	96	43	37	70	45
1:20018277-20018581|66.03|MACS_peak_27	63	51	26	23	17	13	63	79	37	34	66	34
1:20106196-20107535|132.01|MACS_peak_112	218	464	107	352	105	431	237	322	83	186	157	117
1:20213777-20214773|191.67|MACS_peak_13	45	226	14	85	11	103	41	30	14	21	13	26
1:20287763-20288315|50.41|MACS_peak_113	19	18	8	70	17	91	21	17	7	17	15	11
1:20301923-20303591|122.27|MACS_peak_114	139	135	105	309	144	339	79	200	79	153	102	146
1:20470528-20471518|86.80|MACS_peak_115	57	146	69	252	66	290	81	123	81	111	98	74
1:20504011-20504685|122.36|MACS_peak_116	14	41	13	113	14	141	9	20	15	27	25	21
1:20749723-20750225|53.06|MACS_peak_14	11	77	13	48	20	68	17	16	14	11	27	23
1:20819832-20820731|95.72|MACS_peak_28	668	1066	727	1134	682	1004	877	918	572	729	1058	508
1:20845374-20846211|52.99|MACS_peak_15	94	125	46	91	43	138	63	77	31	50	59	58
1:20951066-20952289|65.32|MACS_peak_29	1558	2429	1561	2593	1921	2540	2038	2196	1263	1591	2835	1045
1:21068246-21069199|234.51|MACS_peak_117	28	217	40	147	24	318	64	76	31	52	48	48
1:21074167-21074696|61.40|MACS_peak_30	74	87	51	106	82	78	76	75	76	91	122	69
1:21078601-21079969|64.14|MACS_peak_31	1622	2494	1725	2671	1863	2564	2012	2245	1087	1662	2844	1111
1:21166113-21167020|63.52|MACS_peak_32	642	834	470	885	493	985	657	642	397	453	847	374
1:21218209-21219213|50.81|MACS_peak_33	681	1017	571	1041	589	942	718	780	501	524	1145	417
1:21486340-21486957|79.32|MACS_peak_118	24	38	22	44	27	117	17	39	14	35	17	21
1:21563228-21564147|182.88|MACS_peak_119	23	67	18	122	21	243	18	41	22	21	35	50
1:21617178-21617833|64.28|MACS_peak_21	41	49	33	56	16	30	57	120	18	58	43	29
1:21660563-21661554|175.81|MACS_peak_120	15	131	22	192	25	308	87	78	25	12	86	34
1:21709782-21710757|213.34|MACS_peak_121	42	118	38	163	28	217	47	93	31	66	48	29
1:21713551-21714407|222.32|MACS_peak_122	44	128	34	191	40	289	78	107	63	49	83	37
1:21816788-21817403|59.14|MACS_peak_123	10	70	5	76	9	92	17	8	13	15	16	24
1:21826074-21827102|57.74|MACS_peak_16	134	180	65	109	48	66	68	96	52	57	37	52
1:21918834-21919878|108.38|MACS_peak_124	101	143	119	199	133	350	52	146	83	121	110	104
1:21927421-21928089|218.61|MACS_peak_125	19	26	22	94	20	174	12	25	9	27	8	18
1:22398682-22399359|85.74|MACS_peak_126	26	62	11	80	9	142	10	20	22	21	22	33
1:22409964-22411071|110.07|MACS_peak_17	15	171	17	127	7	222	29	38	12	36	18	22
1:22410072-22411076|140.28|MACS_peak_127	12	166	15	122	7	202	27	36	12	34	16	20
1:22508779-22509397|50.60|MACS_peak_34	62	83	74	90	50	97	54	82	70	68	66	58
1:22533062-22534321|210.73|MACS_peak_35	2110	3175	2554	2949	2940	2705	2032	2804	1643	2242	3677	1533
1:22616259-22616725|67.98|MACS_peak_22	44	37	22	39	15	35	47	112	23	23	35	51
1:22626901-22627465|90.75|MACS_peak_128	28	90	19	81	15	107	27	32	23	31	27	23
1:22762323-22763143|168.57|MACS_peak_23	43	28	55	83	32	39	97	186	58	87	130	72
1:22762630-22763246|112.26|MACS_peak_3	36	19	43	60	24	33	81	137	39	62	104	48
1:22848013-22848622|238.98|MACS_peak_24	27	8	18	52	17	15	105	150	17	19	85	61
1:22848027-22848581|118.23|MACS_peak_4	27	8	18	50	17	15	105	149	17	19	84	61
1:22894528-22895609|116.29|MACS_peak_129	34	39	22	78	21	160	21	35	9	21	25	35
1:22900859-22901856|62.77|MACS_peak_130	77	82	94	193	88	384	178	230	130	156	244	75
1:22901005-22901724|62.39|MACS_peak_36	75	81	90	189	83	361	175	223	128	150	243	68
1:22901026-22901761|153.36|MACS_peak_25	75	81	91	191	85	355	175	220	130	151	242	69
1:23255763-23257205|265.89|MACS_peak_37	2764	3833	3330	3980	3738	4195	3465	4449	2398	3236	5550	2196
1:23361434-23362016|73.35|MACS_peak_131	29	100	16	81	21	82	11	14	19	19	20	21
1:23361545-23362073|76.45|MACS_peak_18	27	96	11	82	18	83	11	13	18	15	19	22
1:23443972-23446115|220.17|MACS_peak_132	123	433	58	490	63	698	200	206	96	114	161	111
1:23444856-23446029|65.23|MACS_peak_5	72	313	43	369	41	534	155	153	58	64	121	74
1:23466218-23467008|125.67|MACS_peak_19	55	142	23	101	36	119	45	37	28	47	70	43
1:23589219-23590136|224.31|MACS_peak_133	80	142	23	135	32	211	38	97	24	43	38	32
1:23648799-23650123|125.47|MACS_peak_20	98	302	59	156	27	372	55	93	40	56	54	50
1:23648877-23650031|398.17|MACS_peak_134	89	298	53	151	26	363	53	90	35	52	50	47
1:23670474-23671443|80.80|MACS_peak_6	37	118	47	262	54	189	73	87	21	40	88	44
1:23670649-23671433|70.46|MACS_peak_135	25	105	41	240	46	170	58	74	13	38	75	33
1:23770593-23771285|216.06|MACS_peak_136	18	37	8	107	19	196	7	10	20	14	9	26
1:23775531-23776433|67.27|MACS_peak_137	31	115	48	162	29	155	37	53	14	47	47	48
1:23824121-23824860|133.92|MACS_peak_138	21	49	32	87	19	184	26	27	20	23	21	30
1:23921444-23922713|175.82|MACS_peak_38	1228	2112	1377	2204	1488	1879	1358	1940	956	1417	2193	981
1:24005101-24005945|125.06|MACS_peak_39	634	1211	680	1197	729	1277	735	876	588	695	1077	502
1:24133552-24134331|57.87|MACS_peak_21	84	123	61	188	76	122	41	59	40	40	66	54
1:24133602-24134430|77.14|MACS_peak_139	85	124	61	186	76	125	41	62	41	40	66	57
1:24292130-24293054|66.34|MACS_peak_140	195	188	42	129	82	293	180	333	60	89	124	68
1:24309961-24310591|67.98|MACS_peak_26	35	54	32	69	16	50	71	99	30	24	42	37
1:24316513-24317587|112.98|MACS_peak_27	129	123	61	78	65	138	229	319	75	112	161	110
1:24349428-24350634|182.56|MACS_peak_141	145	369	90	392	135	637	118	261	90	105	189	104
1:24367293-24368512|107.91|MACS_peak_142	117	245	68	234	104	247	86	177	35	85	115	75
1:24374902-24375228|56.49|MACS_peak_40	35	36	17	48	10	44	27	21	51	13	37	37
1:24404673-24405238|72.42|MACS_peak_143	16	59	22	58	13	97	9	22	9	8	7	25
1:24456655-24457697|171.44|MACS_peak_144	99	161	54	109	78	256	54	97	18	38	79	68
1:24458865-24459843|283.30|MACS_peak_145	34	155	15	136	16	273	25	25	12	17	9	24
1:24459053-24459843|108.09|MACS_peak_22	33	143	14	123	14	250	24	20	11	14	8	22
1:24470491-24471496|50.91|MACS_peak_146	86	121	82	147	85	202	43	110	55	78	88	84
1:24491741-24492224|90.90|MACS_peak_147	21	65	21	37	15	72	18	7	18	21	10	24
1:24491750-24492229|67.24|MACS_peak_23	21	66	21	37	15	72	18	8	18	21	9	24
1:24563930-24564649|277.06|MACS_peak_28	22	52	40	54	31	45	135	236	66	86	126	108
1:24564066-24564601|93.00|MACS_peak_5	20	49	36	49	26	39	128	205	61	78	113	94
1:24564161-24564508|56.78|MACS_peak_41	17	40	32	39	19	34	101	169	53	66	96	76
1:24697738-24698463|121.50|MACS_peak_148	29	79	43	203	37	165	24	54	43	68	27	33
1:24870511-24871229|81.01|MACS_peak_149	31	114	25	94	16	143	47	72	31	18	57	39
1:24942690-24943925|100.87|MACS_peak_150	133	375	103	217	85	331	102	276	34	82	115	110
1:25085049-25086162|126.89|MACS_peak_151	53	186	91	219	110	274	64	140	49	116	98	71
1:25087811-25089247|53.95|MACS_peak_152	94	169	91	224	56	308	82	204	22	62	105	96
1:25097330-25098238|260.70|MACS_peak_153	21	87	43	191	46	236	47	91	26	49	46	39
1:25180109-25181157|50.91|MACS_peak_154	39	111	43	140	48	149	35	60	32	53	63	77
1:25191831-25192480|91.38|MACS_peak_155	20	78	36	71	25	98	33	36	9	16	24	23
1:25210206-25210949|94.00|MACS_peak_156	23	76	18	99	35	142	40	24	33	43	38	55
1:25213786-25214563|156.28|MACS_peak_157	10	48	28	78	22	179	6	26	39	23	14	38
1:25222896-25223676|251.08|MACS_peak_158	8	31	19	115	19	212	13	21	15	9	16	29
1:25272026-25272614|76.47|MACS_peak_159	11	74	18	66	10	98	9	23	9	31	20	10
1:25348409-25349054|75.38|MACS_peak_160	13	69	17	66	10	149	47	24	24	9	35	33
1:25430169-25431027|51.36|MACS_peak_161	60	165	30	187	50	245	85	103	46	51	116	62
1:25510227-25510929|64.18|MACS_peak_162	72	107	59	165	35	106	54	78	32	62	34	36
1:25652742-25653472|65.72|MACS_peak_163	51	123	44	167	63	115	26	67	27	51	64	57
1:25713463-25714135|58.58|MACS_peak_164	35	114	44	79	29	145	48	70	48	64	41	37
1:25754470-25755096|77.38|MACS_peak_165	16	160	11	37	21	105	29	82	21	38	45	25
1:25824480-25825024|55.61|MACS_peak_166	7	37	6	57	17	92	8	19	13	15	17	34
1:25829541-25830911|63.42|MACS_peak_42	1142	2078	1218	2275	1354	1908	975	1739	718	1338	1877	875
1:25832019-25832878|118.19|MACS_peak_167	73	205	62	193	73	339	63	119	49	82	64	65
1:26626419-26626967|58.90|MACS_peak_168	13	34	3	60	8	77	14	22	19	16	13	17
1:26633915-26634695|106.22|MACS_peak_169	26	146	38	172	45	161	16	28	14	31	38	24
1:26633934-26634577|51.37|MACS_peak_7	23	135	34	157	39	151	15	25	13	29	33	22
1:26633977-26634577|92.25|MACS_peak_24	23	132	33	153	37	147	13	25	13	28	33	21
1:26686784-26688446|57.16|MACS_peak_6	169	155	196	454	140	197	132	186	179	267	131	390
1:26816960-26817705|96.92|MACS_peak_170	27	167	16	103	2	149	39	35	7	19	18	16
1:26816970-26817738|109.10|MACS_peak_25	27	167	16	105	2	149	40	35	7	18	18	16
1:27003451-27004268|161.00|MACS_peak_171	20	72	10	115	20	151	13	14	11	23	11	26
1:27277767-27278453|104.91|MACS_peak_172	18	39	20	85	5	167	27	74	20	23	41	27
1:27727226-27727710|58.36|MACS_peak_173	15	62	9	71	8	76	8	9	6	10	4	5
1:28002146-28002787|115.77|MACS_peak_174	26	61	23	105	21	141	23	74	11	19	7	31
1:28100038-28101086|85.54|MACS_peak_175	81	273	151	532	144	429	81	264	70	159	144	174
1:28331892-28332535|80.82|MACS_peak_26	12	109	21	86	12	121	10	26	20	14	8	9
1:28331903-28332540|107.00|MACS_peak_176	12	109	21	85	12	121	11	26	20	14	8	9
1:28547992-28548749|156.52|MACS_peak_177	47	175	14	129	13	149	64	103	13	21	23	17
1:28565508-28566340|194.31|MACS_peak_178	42	123	68	192	52	198	18	42	24	56	37	46
1:28565624-28566195|59.05|MACS_peak_27	34	113	62	171	46	180	14	34	22	46	32	37
1:28581622-28582248|77.53|MACS_peak_179	11	49	6	61	1	122	7	10	15	13	21	22
1:28904818-28905655|150.79|MACS_peak_180	7	27	18	49	10	158	4	10	5	12	0	19
1:29052656-29053429|169.34|MACS_peak_181	65	129	19	157	22	176	38	92	15	26	26	40
1:29081951-29082338|56.78|MACS_peak_43	63	95	46	49	65	42	50	123	45	52	65	65
1:29216834-29217674|135.79|MACS_peak_29	94	158	47	280	95	200	187	368	75	118	183	153
1:29231611-29231839|65.43|MACS_peak_30	3	9	12	17	4	5	7	38	4	10	9	11
1:29329714-29330448|63.27|MACS_peak_182	55	120	65	150	51	177	56	141	33	65	71	38
1:29352893-29353134|62.32|MACS_peak_31	8	14	3	13	3	4	6	31	1	5	7	9
1:29688132-29688754|74.06|MACS_peak_183	7	54	11	45	5	108	4	2	13	10	6	14
1:29690023-29691838|258.04|MACS_peak_184	121	304	63	402	132	799	102	240	60	83	150	134
1:29691904-29692606|54.95|MACS_peak_185	48	101	52	114	37	184	41	67	25	57	45	71
1:29731268-29733032|240.56|MACS_peak_186	74	329	30	308	60	674	68	132	37	36	106	72
1:30060674-30061467|169.37|MACS_peak_187	16	142	3	156	11	209	37	46	9	31	34	25
1:30060744-30061322|73.07|MACS_peak_28	12	121	2	127	10	178	31	28	9	23	29	19
1:30191587-30192106|73.07|MACS_peak_188	16	60	4	63	11	92	14	40	5	3	4	12
1:30199008-30199657|73.12|MACS_peak_189	7	30	9	70	19	96	1	10	2	8	5	19
1:30204484-30205287|361.03|MACS_peak_190	56	131	27	142	29	308	68	49	19	29	54	19
1:30204631-30205241|64.85|MACS_peak_29	50	128	25	126	27	292	66	43	17	25	50	18
1:30216427-30217468|252.55|MACS_peak_191	27	213	27	236	27	479	68	117	35	92	101	73
1:30417147-30417689|81.73|MACS_peak_192	20	27	7	35	6	93	10	24	4	14	4	18
1:30446316-30446748|97.71|MACS_peak_32	13	17	9	14	0	18	56	73	10	6	23	23
1:30503043-30503763|71.59|MACS_peak_193	53	87	42	138	39	147	41	75	23	27	51	25
1:30510065-30511365|760.46|MACS_peak_194	30	227	35	373	35	512	50	98	24	42	49	49
1:30510204-30510952|163.85|MACS_peak_8	25	179	25	299	23	431	31	80	11	31	42	31
1:30536883-30537724|125.68|MACS_peak_195	52	120	40	96	36	195	25	59	37	49	39	46
1:30564289-30565330|426.21|MACS_peak_196	78	359	36	186	48	395	92	107	13	36	44	53
1:30564313-30565350|91.41|MACS_peak_30	76	359	36	187	50	396	92	109	12	36	44	55
1:30564548-30565247|63.35|MACS_peak_9	64	321	32	155	40	357	71	93	6	31	35	35
1:30578287-30578888|82.61|MACS_peak_197	2	36	17	78	18	105	4	6	7	10	6	15
1:30651736-30652411|120.77|MACS_peak_198	25	93	18	108	23	132	29	55	14	38	26	29
1:30750121-30752582|157.81|MACS_peak_199	371	601	223	574	253	749	292	472	177	286	311	241
1:30758606-30759279|122.61|MACS_peak_200	26	21	32	67	20	118	19	30	23	19	19	26
1:30872681-30874438|65.20|MACS_peak_44	2849	4382	4045	4678	4471	4099	3716	4913	2453	3955	5567	2346
1:31019360-31019885|63.16|MACS_peak_201	20	35	13	24	20	78	14	8	12	22	13	15
1:31051572-31052002|63.67|MACS_peak_33	37	19	19	116	18	68	81	87	27	20	79	34
1:31133547-31134312|180.91|MACS_peak_202	17	87	13	49	16	168	35	30	17	19	42	22
1:31176074-31176595|60.90|MACS_peak_31	56	49	18	35	43	30	15	21	12	24	28	28
1:31181306-31181955|118.72|MACS_peak_203	17	39	12	60	19	128	3	24	5	20	2	13
1:31217081-31217757|62.47|MACS_peak_204	13	34	37	104	25	98	10	43	22	40	31	30
1:31363989-31364397|151.23|MACS_peak_34	9	11	47	78	2	18	62	88	60	88	41	42
1:31475636-31476479|104.76|MACS_peak_205	60	58	36	163	13	169	35	70	23	33	27	45
1:31645014-31645740|119.43|MACS_peak_206	17	151	20	71	14	121	42	25	13	25	16	16
1:31645015-31645762|109.42|MACS_peak_32	17	151	20	71	14	123	42	25	13	25	16	16
1:32172131-32173361|98.52|MACS_peak_45	1917	2877	2295	3005	2670	2761	1906	2828	1341	2208	3261	1445
1:32286666-32287301|81.49|MACS_peak_207	34	91	39	115	45	139	27	131	35	72	63	49
1:32358823-32359566|73.48|MACS_peak_33	34	183	114	170	41	112	20	58	38	90	51	52
1:32497463-32497966|67.52|MACS_peak_208	10	35	19	35	17	67	9	21	0	13	10	16
1:32498154-32498852|84.74|MACS_peak_209	21	71	17	44	11	105	12	30	9	17	17	17
1:32560733-32561304|54.92|MACS_peak_210	9	52	13	46	11	99	14	33	10	5	16	11
1:32581600-32582696|59.46|MACS_peak_211	95	190	56	180	47	326	136	265	41	48	100	108
1:32581610-32582513|73.21|MACS_peak_35	82	169	53	156	40	307	132	255	34	43	94	97
1:32635179-32636043|78.77|MACS_peak_212	88	148	31	108	33	210	76	162	21	12	71	60
1:32731635-32732558|327.53|MACS_peak_213	23	109	15	171	10	267	13	32	13	13	17	28
1:32731810-32732487|51.62|MACS_peak_10	19	102	14	154	9	260	12	28	13	12	14	22
1:32968430-32968994|58.58|MACS_peak_214	47	156	34	34	57	97	21	79	14	18	40	36
1:33062570-33063195|97.38|MACS_peak_215	37	102	14	122	19	126	29	62	13	19	27	27
1:33079859-33080709|104.31|MACS_peak_34	21	138	13	71	10	100	11	14	5	17	9	10
1:33112256-33112761|62.79|MACS_peak_216	8	73	7	38	11	82	3	15	1	20	5	10
1:33173680-33174448|75.38|MACS_peak_217	38	112	13	64	34	106	82	64	19	66	35	27
1:33201231-33202577|112.63|MACS_peak_218	130	630	101	748	189	1264	223	333	168	131	466	175
1:33333803-33334528|66.76|MACS_peak_35	36	165	31	103	16	177	20	50	16	20	27	36
1:33333899-33334606|158.97|MACS_peak_219	37	158	33	100	15	174	18	52	16	17	25	35
1:33370773-33371398|66.18|MACS_peak_220	35	35	22	64	19	83	10	26	18	44	23	20
1:33494826-33495157|63.21|MACS_peak_36	11	13	6	25	4	16	23	35	11	14	17	19
1:33579787-33580939|121.64|MACS_peak_221	75	151	49	124	51	179	39	71	30	63	49	63
1:33581463-33582027|56.10|MACS_peak_222	22	69	16	69	7	104	3	11	6	10	21	25
1:33588197-33589380|86.65|MACS_peak_223	118	384	50	528	66	682	311	315	126	93	304	105
1:33669331-33670793|58.89|MACS_peak_46	1018	2020	1127	2201	1200	2090	1080	1522	665	1103	1601	785
1:33719599-33720822|76.35|MACS_peak_47	1091	1901	1304	1895	1402	1715	1271	1734	932	1329	1899	779
1:33751316-33751691|66.15|MACS_peak_37	30	12	18	75	23	58	37	45	40	22	58	32
1:33964493-33965249|64.32|MACS_peak_224	46	106	60	170	52	149	78	62	62	56	65	51
1:33969515-33970919|310.06|MACS_peak_225	53	185	59	364	47	465	58	100	88	127	68	67
1:34040875-34041881|225.77|MACS_peak_226	53	130	56	189	77	313	35	94	47	54	74	53
1:34042062-34042954|212.41|MACS_peak_227	46	93	41	144	29	232	40	73	14	59	41	24
1:34050920-34051848|223.57|MACS_peak_228	23	84	34	139	59	237	25	54	32	39	34	54
1:34060107-34061713|148.63|MACS_peak_229	229	595	341	905	268	951	332	466	180	321	373	311
1:34073311-34075473|74.07|MACS_peak_230	120	294	155	463	123	508	89	191	71	175	158	147
1:34095135-34095652|128.78|MACS_peak_38	46	60	57	96	35	61	106	203	48	70	132	70
1:34095137-34095622|68.70|MACS_peak_7	45	60	56	94	35	59	106	199	47	70	132	70
1:34104763-34105583|74.43|MACS_peak_231	28	62	27	106	33	115	37	43	25	58	21	34
1:34120502-34121193|125.33|MACS_peak_232	19	99	24	122	16	142	17	60	30	53	16	33
1:34142882-34144110|427.26|MACS_peak_233	97	180	52	200	42	372	43	109	35	93	39	69
1:34158496-34159479|120.59|MACS_peak_234	105	187	81	329	109	355	87	206	48	89	119	100
1:34236013-34236797|62.84|MACS_peak_48	390	589	463	938	517	948	333	616	281	522	568	329
1:34250985-34251657|94.43|MACS_peak_235	4	21	17	31	19	91	9	23	4	13	13	24
1:34284579-34285130|54.41|MACS_peak_236	12	13	20	89	8	90	7	14	10	22	17	15
1:34388875-34389885|99.87|MACS_peak_237	21	130	21	144	25	214	38	45	24	29	51	65
1:34399267-34400066|66.81|MACS_peak_39	156	101	81	247	155	73	69	262	45	85	110	85
1:34409349-34410404|73.34|MACS_peak_238	68	266	64	405	75	451	154	226	63	105	178	138
1:34793144-34794548|91.82|MACS_peak_239	125	321	130	520	191	534	205	361	124	182	235	179
1:34801250-34802861|50.11|MACS_peak_49	1602	2609	1966	3120	2227	2685	1414	2502	1071	2086	2507	1466
1:34878925-34879529|52.68|MACS_peak_240	32	28	12	80	21	84	3	15	18	20	15	29
1:35183783-35184947|549.16|MACS_peak_241	49	156	19	83	27	401	16	41	15	34	13	48
1:35183955-35184735|127.34|MACS_peak_36	32	149	12	68	23	369	13	38	10	26	10	31
1:35201017-35202375|117.88|MACS_peak_242	354	435	76	291	109	546	129	279	43	135	174	137
1:35212320-35212692|64.12|MACS_peak_50	57	68	35	42	85	103	105	90	44	43	98	70
1:35213518-35214399|367.00|MACS_peak_243	20	94	25	144	42	329	29	30	15	50	37	37
1:35354553-35355284|191.34|MACS_peak_244	16	57	23	133	15	189	23	49	20	18	26	19
1:35374924-35375566|82.96|MACS_peak_245	10	14	16	46	21	106	0	10	11	13	12	31
1:35380881-35381730|85.44|MACS_peak_246	66	92	71	153	53	207	45	92	41	61	50	70
1:35393369-35394239|316.57|MACS_peak_247	23	172	26	198	26	276	47	49	24	80	48	26
1:35393463-35394146|62.70|MACS_peak_11	21	146	22	178	22	252	38	46	21	74	45	24
1:35452222-35453610|56.37|MACS_peak_248	219	407	325	655	300	690	134	313	145	332	274	190
1:35457354-35458331|65.98|MACS_peak_249	84	124	70	273	69	304	74	89	46	135	117	68
1:35527614-35528860|125.43|MACS_peak_40	477	580	358	891	350	1197	479	1004	205	386	617	403
1:35642137-35643461|52.16|MACS_peak_250	251	341	116	484	226	706	240	425	111	185	285	196
1:35659576-35660046|65.49|MACS_peak_251	3	21	10	29	7	89	4	6	17	6	7	16
1:35668168-35669102|78.20|MACS_peak_252	20	78	52	158	14	257	80	118	17	53	81	46
1:35685576-35686115|50.31|MACS_peak_51	157	161	138	129	172	95	119	193	73	113	241	111
1:35810752-35811927|108.05|MACS_peak_253	79	73	81	193	64	222	21	89	33	101	70	80
1:35875047-35876017|275.07|MACS_peak_254	31	198	41	199	17	338	56	91	28	54	47	70
1:35879644-35880265|62.59|MACS_peak_255	28	30	25	56	27	96	14	25	9	23	20	39
1:35889673-35890572|160.29|MACS_peak_256	46	103	36	157	41	221	27	47	31	49	37	59
1:35902126-35903025|453.18|MACS_peak_257	73	149	124	167	104	357	58	92	49	101	46	42
1:35919855-35920768|54.25|MACS_peak_41	154	305	95	284	124	428	287	365	114	114	324	138
1:35941346-35942706|147.47|MACS_peak_42	265	529	235	814	262	721	641	1024	281	521	796	517
1:35943213-35944292|62.00|MACS_peak_258	60	118	74	210	71	251	45	103	38	66	72	79
1:35957446-35958354|79.44|MACS_peak_259	52	77	38	211	44	207	81	78	36	85	76	56
1:36087474-36089960|69.43|MACS_peak_260	230	380	266	669	241	678	160	350	155	306	239	295
1:36230728-36231232|81.20|MACS_peak_43	65	60	24	38	50	27	44	143	9	20	43	40
1:36243682-36244787|62.23|MACS_peak_52	1050	2036	1322	2275	1642	1918	932	1741	756	1516	1734	989
1:36268981-36270170|65.41|MACS_peak_37	223	341	228	460	261	337	91	147	110	211	204	198
1:36273025-36273903|53.16|MACS_peak_261	42	68	87	205	70	190	35	55	32	100	58	85
1:36301696-36302822|102.69|MACS_peak_262	40	107	55	224	62	201	38	58	40	87	31	94
1:36484295-36485710|274.67|MACS_peak_263	75	308	51	357	70	454	70	138	39	74	111	64
1:36484365-36485787|72.37|MACS_peak_12	77	304	50	349	73	456	70	144	43	74	110	67
1:36484393-36485588|53.03|MACS_peak_38	68	278	39	315	61	419	63	121	31	58	100	55
1:36492255-36492981|54.01|MACS_peak_264	64	105	64	263	64	185	23	53	39	61	67	66
1:36511320-36513301|155.74|MACS_peak_53	3766	4839	5114	6023	6314	5093	2814	6115	1993	5614	5568	3436
1:36535744-36536579|103.71|MACS_peak_265	21	38	25	104	49	165	11	33	50	47	19	65
1:36571217-36572104|225.04|MACS_peak_266	37	69	39	132	52	249	11	42	40	47	31	61
1:36644419-36645543|321.78|MACS_peak_267	32	80	50	187	42	278	13	33	17	53	29	51
1:36659057-36660052|95.83|MACS_peak_268	34	76	35	110	32	159	11	42	29	37	39	59
1:36683830-36684800|84.60|MACS_peak_269	108	238	149	409	168	257	78	160	59	146	137	116
1:36696334-36698869|56.38|MACS_peak_270	296	340	358	720	279	457	151	406	176	348	223	380
1:36784464-36785926|54.63|MACS_peak_54	836	1506	1035	1700	1234	1520	722	1386	464	1043	1137	789
1:36871820-36872468|77.49|MACS_peak_271	25	29	19	72	20	95	6	22	15	24	5	15
1:36921615-36922404|128.27|MACS_peak_272	45	130	70	269	55	225	26	73	56	142	51	62
1:36965683-36966288|64.83|MACS_peak_273	10	26	18	53	5	94	11	26	3	36	8	36
1:37122204-37122764|94.72|MACS_peak_44	34	73	51	133	57	147	70	155	52	80	165	83
1:37305503-37306532|96.40|MACS_peak_274	61	141	46	239	75	234	25	86	30	64	59	78
1:37314028-37314890|133.44|MACS_peak_275	44	60	41	142	52	221	25	27	47	49	16	86
1:37324559-37325198|78.38|MACS_peak_276	19	45	26	80	46	88	9	37	8	28	20	34
1:37353215-37354050|199.94|MACS_peak_277	41	74	33	114	42	164	29	24	18	33	22	46
1:37380624-37381375|122.05|MACS_peak_278	26	42	13	38	17	159	5	22	16	19	10	46
1:37511940-37512878|72.10|MACS_peak_279	86	153	38	107	25	190	28	63	17	36	53	70
1:37511968-37512872|59.60|MACS_peak_39	85	150	35	107	25	183	27	62	16	35	50	68
1:37606861-37607573|67.04|MACS_peak_280	28	68	25	39	29	97	22	22	33	25	12	57
1:37611899-37612829|79.12|MACS_peak_40	120	139	80	198	147	100	25	91	40	105	88	102
1:37613598-37614538|57.79|MACS_peak_55	225	249	154	167	220	171	108	243	107	162	241	146
1:37671213-37671929|126.85|MACS_peak_281	37	76	39	75	36	140	32	65	29	22	31	31
1:37719236-37720418|51.02|MACS_peak_56	716	1089	776	1031	931	1117	712	1108	463	773	1194	541
1:37864273-37865817|154.38|MACS_peak_57	4068	6333	6147	7133	7006	5982	5031	7189	3177	6424	7703	4129
1:37891262-37891862|51.12|MACS_peak_282	15	44	17	64	41	112	19	54	33	31	17	36
1:37922489-37922987|55.74|MACS_peak_283	13	47	14	36	21	57	9	30	13	17	13	18
1:37996675-37998817|126.95|MACS_peak_58	3226	4539	4302	5841	4849	4977	2883	5171	1780	4311	4659	3042
1:38161066-38161942|65.89|MACS_peak_284	44	128	69	195	53	180	77	91	22	70	61	55
1:38165532-38166196|112.08|MACS_peak_41	27	143	37	90	27	113	22	21	9	19	20	55
1:38165536-38166201|65.17|MACS_peak_285	27	144	37	89	27	115	22	21	9	19	20	54
1:38185191-38186960|63.42|MACS_peak_286	403	683	348	767	443	733	351	753	134	396	458	340
1:38217782-38218801|77.02|MACS_peak_287	88	135	129	248	131	219	66	129	69	165	98	108
1:38236776-38237908|245.67|MACS_peak_288	82	252	48	185	111	376	20	113	31	83	59	97
1:38236896-38237825|57.77|MACS_peak_42	75	247	44	170	103	367	17	109	31	80	57	89
1:38241222-38242258|222.75|MACS_peak_289	46	78	40	155	37	240	5	35	27	41	27	55
1:38262256-38263843|101.78|MACS_peak_290	200	523	195	576	222	610	156	412	109	235	286	272
1:38267709-38269275|69.40|MACS_peak_291	213	645	282	696	332	803	262	525	136	400	370	327
1:38339710-38340866|214.59|MACS_peak_292	69	343	26	311	42	418	92	217	34	62	87	70
1:38339845-38340864|103.08|MACS_peak_13	63	328	20	301	38	405	91	207	28	58	86	67
1:38381277-38382019|84.76|MACS_peak_293	28	71	35	152	26	159	8	48	12	57	30	48
1:38389286-38391411|131.51|MACS_peak_294	223	517	192	592	254	666	259	540	106	226	333	268
1:38398011-38398945|58.55|MACS_peak_295	62	65	40	164	82	136	26	44	27	76	54	78
1:38445439-38447159|229.78|MACS_peak_296	164	601	186	639	226	928	103	351	84	258	206	231
1:38448602-38450457|52.22|MACS_peak_14	79	224	139	562	98	442	49	191	95	178	100	114
1:38448786-38450234|252.46|MACS_peak_297	72	191	118	499	87	394	46	168	85	161	91	88
1:38456652-38457280|114.08|MACS_peak_298	26	36	28	99	27	116	12	33	14	36	8	37
1:38457620-38458783|140.54|MACS_peak_299	53	108	61	214	68	281	41	112	31	151	37	86
1:38467148-38468341|172.53|MACS_peak_300	34	139	53	267	58	311	58	85	54	89	78	88
1:38474803-38476401|312.20|MACS_peak_301	75	195	71	374	53	458	45	110	41	91	47	132
1:38474819-38476063|60.10|MACS_peak_15	59	170	53	324	46	386	37	100	39	76	37	98
1:38488549-38489616|182.25|MACS_peak_302	78	365	46	217	83	432	24	136	34	93	86	140
1:38522241-38522842|65.55|MACS_peak_303	9	53	17	78	14	106	7	22	12	15	18	36
1:38536724-38539135|50.89|MACS_peak_304	343	630	282	693	390	648	260	768	147	448	429	421
1:38548531-38549616|259.31|MACS_peak_305	82	284	97	333	156	540	70	200	49	134	120	147
1:38549978-38551129|161.41|MACS_peak_306	59	200	120	429	109	387	48	179	75	152	60	108
1:38556228-38556812|81.72|MACS_peak_307	22	88	17	131	26	92	6	41	13	33	15	30
1:38561289-38563865|106.93|MACS_peak_308	175	483	194	864	229	919	135	364	72	214	267	298
1:38561452-38563275|57.17|MACS_peak_16	139	424	175	726	192	834	125	334	60	188	245	240
1:38571421-38572570|139.29|MACS_peak_309	20	103	25	168	52	206	14	52	26	62	28	92
1:38586769-38589143|57.07|MACS_peak_310	278	858	255	1223	266	1238	325	863	132	397	388	348
1:38594545-38595376|103.80|MACS_peak_311	34	127	78	213	76	233	41	97	33	110	61	79
1:38600272-38601091|119.84|MACS_peak_312	41	108	28	130	42	151	23	53	20	65	26	41
1:38606043-38607379|91.70|MACS_peak_313	70	171	68	236	86	239	53	204	50	113	80	99
1:38652130-38652685|57.33|MACS_peak_45	27	55	48	58	34	44	15	83	37	46	49	42
1:38764828-38765520|82.83|MACS_peak_314	25	38	21	71	32	174	24	26	17	18	15	55
1:38766210-38768373|120.81|MACS_peak_315	310	637	332	923	351	940	271	530	175	396	405	406
1:38791017-38792005|363.72|MACS_peak_316	53	120	69	209	82	428	30	92	44	55	25	75
1:38796597-38797326|63.29|MACS_peak_317	16	44	16	89	21	101	15	40	11	34	4	17
1:38816329-38816979|133.65|MACS_peak_46	26	47	67	107	36	81	82	151	59	95	127	67
1:38817630-38818042|72.30|MACS_peak_47	10	30	10	40	17	23	23	79	11	24	24	24
1:38835452-38837041|174.11|MACS_peak_59	1958	3134	2277	3311	2996	3069	1535	2976	1111	2621	3033	1792
1:38860858-38861549|56.99|MACS_peak_318	43	57	34	141	27	120	26	26	34	43	46	49
1:38869594-38870224|97.38|MACS_peak_319	25	54	24	73	31	111	22	28	30	30	21	35
1:38881152-38881808|97.92|MACS_peak_320	15	11	19	37	24	111	3	18	23	9	10	32
1:38892991-38893954|53.22|MACS_peak_48	70	92	80	199	94	175	74	213	61	99	132	119
1:38897083-38898440|55.44|MACS_peak_60	1121	2225	1649	2377	1969	2287	1196	1978	795	1747	2077	1194
1:38934499-38935329|74.84|MACS_peak_321	57	109	79	201	68	135	25	44	22	101	63	66
1:38937502-38938039|58.67|MACS_peak_43	17	70	3	39	8	54	13	18	4	9	4	9
1:38966054-38966743|89.54|MACS_peak_49	44	48	30	59	22	74	62	141	30	56	49	52
1:39015350-39016148|149.59|MACS_peak_322	33	108	46	183	35	229	31	43	26	41	43	55
1:39083910-39085247|253.94|MACS_peak_323	58	171	60	368	66	507	85	102	35	75	103	90
1:39084163-39085057|73.32|MACS_peak_17	40	159	54	334	57	448	71	83	31	53	90	76
1:39122629-39123060|75.93|MACS_peak_50	27	22	25	51	24	40	42	80	27	59	53	54
1:39196112-39197276|55.22|MACS_peak_324	87	180	65	244	68	289	98	153	62	57	86	87
1:39260801-39261667|250.86|MACS_peak_325	26	62	18	64	27	218	12	20	12	28	8	35
1:39318936-39319159|52.65|MACS_peak_61	16	13	10	16	7	8	13	18	24	4	9	20
1:39393809-39394882|78.76|MACS_peak_326	81	80	60	159	94	281	29	105	39	71	82	109
1:39443195-39444256|88.47|MACS_peak_327	89	119	64	227	71	242	68	86	35	77	101	79
1:39477948-39479214|54.63|MACS_peak_62	1022	2181	1477	2330	1652	2264	1230	1986	773	1785	2113	1096
1:39555529-39556514|54.97|MACS_peak_328	75	131	113	221	79	137	71	165	41	91	65	74
1:39576366-39577798|66.88|MACS_peak_63	1977	3238	2378	3396	2881	3170	1801	2934	1188	2546	2926	1730
1:39608355-39608929|62.32|MACS_peak_329	13	20	9	51	24	84	13	17	11	13	6	27
1:39618379-39619458|55.94|MACS_peak_330	87	189	131	247	113	327	152	211	139	172	177	107
1:39639441-39640822|427.14|MACS_peak_331	45	265	37	320	41	625	53	59	46	59	110	54
1:39639681-39640683|66.41|MACS_peak_18	42	255	36	294	38	575	48	47	41	46	107	44
1:39639683-39640725|172.21|MACS_peak_44	42	259	36	301	38	590	48	50	42	49	107	45
1:39663083-39663774|64.19|MACS_peak_51	66	60	54	76	65	56	59	167	38	89	105	71
1:39701030-39703355|143.89|MACS_peak_332	258	442	347	717	362	686	229	406	191	346	336	352
1:39735999-39736845|71.01|MACS_peak_333	39	92	62	296	71	233	31	65	34	113	68	92
1:39740130-39741540|307.72|MACS_peak_334	100	181	98	290	83	350	87	155	44	89	60	76
1:39747025-39747626|69.67|MACS_peak_335	6	42	10	91	15	104	24	19	22	32	22	29
1:39906730-39907828|54.99|MACS_peak_336	36	81	29	200	37	180	33	57	26	44	47	85
1:39934125-39936080|96.06|MACS_peak_337	171	379	190	748	174	613	139	321	95	241	160	229
1:39936176-39937065|71.84|MACS_peak_338	291	541	373	810	403	626	241	464	164	363	359	237
1:39940592-39942354|53.04|MACS_peak_339	89	243	90	489	83	373	47	180	80	153	112	140
1:39940707-39942378|52.40|MACS_peak_19	90	238	89	475	84	360	47	176	77	154	111	136
1:39942441-39943505|91.41|MACS_peak_340	76	228	101	374	92	301	86	140	67	90	113	124
1:39944295-39945461|142.52|MACS_peak_341	59	221	121	466	112	385	75	202	83	148	102	120
1:39947124-39948792|173.90|MACS_peak_342	136	276	144	478	137	402	78	263	78	170	145	143
1:39948867-39950684|191.62|MACS_peak_343	84	256	125	575	117	423	82	225	79	139	119	162
1:39954182-39955957|83.66|MACS_peak_20	46	181	87	461	80	250	25	94	52	161	57	117
1:39960339-39961087|80.67|MACS_peak_344	32	110	30	212	39	172	30	69	29	50	43	66
1:39961994-39962854|111.59|MACS_peak_345	22	106	29	248	19	262	40	48	40	60	57	83
1:39962175-39964491|57.13|MACS_peak_21	104	241	121	674	119	580	87	203	102	197	130	196
1:39963125-39964429|102.05|MACS_peak_346	70	124	76	394	95	286	49	147	51	126	59	105
1:39969672-39970605|134.07|MACS_peak_347	24	88	28	232	51	193	15	76	21	89	19	77
1:39969698-39970475|64.26|MACS_peak_22	22	82	27	215	47	176	15	72	21	73	17	72
1:39976362-39977563|52.43|MACS_peak_23	77	118	58	319	49	181	40	96	36	92	82	140
1:39981852-39983449|65.10|MACS_peak_24	40	136	70	410	69	203	70	136	48	109	62	164
1:40027934-40032565|192.03|MACS_peak_348	464	821	586	1908	486	1134	363	864	279	747	409	647
1:40032824-40034343|113.81|MACS_peak_349	96	244	117	639	106	372	59	173	64	155	98	167
1:40060505-40061245|70.64|MACS_peak_350	38	47	30	66	31	123	11	28	17	29	14	32
1:40064662-40065503|111.99|MACS_peak_351	23	41	27	86	26	155	7	20	18	20	6	26
1:40127758-40128493|120.55|MACS_peak_352	26	27	14	57	25	130	21	30	19	30	25	38
1:40224697-40225447|158.44|MACS_peak_45	57	140	21	64	28	103	28	24	30	23	62	43
1:40546909-40547714|64.66|MACS_peak_8	164	111	100	144	64	68	143	303	55	97	177	109
1:40547032-40548159|67.21|MACS_peak_52	196	140	117	203	84	116	201	391	58	120	224	134
1:40827384-40829992|757.63|MACS_peak_353	132	274	147	561	136	793	80	124	103	131	130	147
1:40827438-40828217|55.43|MACS_peak_25	23	92	30	201	25	327	15	29	18	46	17	35
1:40969505-40970315|52.56|MACS_peak_64	139	150	130	83	80	68	118	162	53	99	91	104
1:41354621-41355228|57.45|MACS_peak_354	14	29	19	125	15	116	9	9	14	17	19	43
1:41379652-41380744|179.44|MACS_peak_46	29	232	15	92	22	230	30	35	27	23	52	54
1:41379887-41380712|131.21|MACS_peak_355	24	203	12	82	18	211	26	32	19	15	51	40
1:41430700-41431829|129.31|MACS_peak_356	102	339	54	363	90	596	205	258	45	49	213	89
1:41430926-41431713|60.02|MACS_peak_26	91	315	53	325	86	550	191	242	41	41	200	79
1:41558923-41559768|136.28|MACS_peak_357	49	156	86	300	58	185	28	66	54	81	44	50
1:41568029-41568540|61.62|MACS_peak_358	24	34	8	40	13	74	13	22	5	15	2	26
1:41629700-41630072|68.88|MACS_peak_53	10	22	14	24	9	14	27	59	12	19	23	39
1:41749115-41749839|111.21|MACS_peak_54	65	78	22	80	45	104	161	231	61	20	137	74
1:41804968-41805479|65.90|MACS_peak_359	8	37	11	100	7	89	3	16	4	18	5	19
1:42105929-42106803|157.41|MACS_peak_360	28	45	26	107	20	176	11	44	37	43	37	38
1:42152864-42153554|70.28|MACS_peak_361	79	146	39	119	38	191	23	78	37	39	53	59
1:42163605-42163945|55.44|MACS_peak_55	7	17	9	52	11	17	7	45	21	8	36	22
1:42242266-42244715|55.05|MACS_peak_362	657	1308	735	1846	781	1725	629	1118	503	952	1095	725
1:42349591-42350291|151.32|MACS_peak_363	14	27	23	56	13	141	13	13	17	13	10	20
1:42355061-42355692|118.30|MACS_peak_364	14	70	12	79	8	147	18	62	13	24	21	25
1:42365550-42366589|179.31|MACS_peak_56	40	104	38	252	33	378	162	270	45	81	103	82
1:42365562-42366799|149.28|MACS_peak_365	44	113	42	266	36	407	169	300	48	85	109	89
1:42440039-42441031|358.86|MACS_peak_366	59	244	91	339	56	460	40	117	35	78	81	56
1:42473992-42474886|59.46|MACS_peak_367	72	176	24	117	43	206	39	117	19	43	43	55
1:42489412-42490285|117.01|MACS_peak_368	104	259	188	514	128	311	43	181	71	210	134	95
1:42504988-42505879|134.87|MACS_peak_369	22	131	43	211	34	299	43	81	29	52	112	46
1:42571673-42572423|153.23|MACS_peak_370	20	116	36	92	16	193	6	38	31	66	18	42
1:42588340-42589161|75.66|MACS_peak_47	71	152	46	94	60	160	42	44	12	57	54	52
1:42588421-42589901|111.37|MACS_peak_371	108	251	75	181	100	277	71	85	31	86	95	102
1:42628467-42629299|140.50|MACS_peak_372	67	87	86	187	73	205	48	84	41	96	70	50
1:42629402-42630442|64.16|MACS_peak_373	87	191	71	220	64	268	25	126	53	99	66	100
1:42740873-42742719|56.64|MACS_peak_374	473	1062	390	1157	446	1438	325	951	258	533	569	386
1:42850763-42851813|56.90|MACS_peak_65	869	1721	977	1848	1061	1604	1183	1288	698	1047	1585	672
1:42888283-42889054|80.62|MACS_peak_66	254	459	178	257	226	305	269	514	141	202	320	178
1:42948537-42949899|65.75|MACS_peak_375	231	325	80	203	119	384	277	526	51	151	175	133
1:42948671-42949776|54.09|MACS_peak_57	221	309	74	182	106	355	268	503	49	141	167	123
1:43097974-43099334|58.68|MACS_peak_67	2080	3667	3085	4457	3551	3517	2285	3510	1887	3133	4235	1959
1:43139499-43140200|72.10|MACS_peak_68	199	309	190	406	213	284	192	289	174	207	312	160
1:43259808-43260363|60.15|MACS_peak_376	24	4	14	55	23	77	8	7	22	14	17	30
1:43313878-43314477|92.15|MACS_peak_377	6	46	11	42	18	104	9	7	6	6	6	16
1:43427065-43427927|138.10|MACS_peak_378	58	219	41	88	22	179	54	77	36	34	35	40
1:43427206-43428149|67.87|MACS_peak_48	57	223	42	93	25	189	50	82	33	41	42	45
1:43484689-43486009|86.44|MACS_peak_379	103	213	124	444	122	357	151	270	88	138	165	90
1:43484789-43485777|53.74|MACS_peak_58	92	197	113	409	114	315	139	252	75	126	155	76
1:43487062-43487815|122.61|MACS_peak_380	21	56	8	108	16	146	11	28	21	22	10	13
1:43493465-43494084|70.45|MACS_peak_381	18	60	25	108	16	98	21	44	9	25	4	24
1:43504061-43505534|174.44|MACS_peak_382	125	272	85	252	112	457	152	232	66	92	162	95
1:43508425-43509204|74.88|MACS_peak_59	85	98	40	89	64	96	113	216	47	57	119	73
1:43511289-43512077|151.04|MACS_peak_60	52	77	47	106	51	122	133	193	72	84	150	55
1:43523027-43524090|93.38|MACS_peak_383	73	222	65	178	58	305	89	121	68	82	114	88
1:43530134-43531016|199.88|MACS_peak_384	61	116	60	203	64	198	25	54	31	72	47	40
1:43589030-43590087|330.14|MACS_peak_49	57	319	46	283	65	504	39	37	15	41	40	53
1:43589038-43590100|543.45|MACS_peak_385	57	319	46	289	66	507	40	37	15	41	40	55
1:43589064-43590047|98.72|MACS_peak_27	56	314	46	281	65	495	38	36	15	41	40	49
1:43698518-43699101|61.83|MACS_peak_69	83	50	99	111	71	83	52	133	87	111	102	71
1:43898813-43899717|67.83|MACS_peak_70	476	495	381	674	344	513	406	476	306	364	555	288
1:43933122-43934640|56.46|MACS_peak_71	3201	4448	3880	5009	4613	4241	3580	4932	2597	3907	5526	2558
1:44118225-44120583|183.09|MACS_peak_72	2766	3902	2974	5126	3303	4039	2344	4043	1825	3291	3656	2294
1:44118250-44120534|64.52|MACS_peak_61	2764	3896	2968	5111	3300	4032	2338	4039	1821	3283	3651	2292
1:44147347-44148493|64.70|MACS_peak_73	1565	2807	1935	3222	2050	2786	1521	2482	1259	2027	2623	1563
1:44567274-44568080|110.34|MACS_peak_386	50	100	35	100	40	143	32	53	25	24	43	26
1:44610688-44611529|185.75|MACS_peak_387	40	70	22	76	37	170	5	27	10	12	24	26
1:44646967-44647543|61.96|MACS_peak_388	18	66	11	55	3	92	9	18	5	16	9	17
1:45135250-45135900|104.26|MACS_peak_50	38	152	13	89	15	129	35	29	8	25	47	3
1:45135252-45135800|111.19|MACS_peak_389	38	148	9	87	15	124	34	27	8	22	45	1
1:45301207-45301712|58.57|MACS_peak_390	11	24	4	50	4	81	2	9	2	3	0	10
1:46066122-46067398|51.56|MACS_peak_74	685	901	563	1061	624	953	508	697	408	537	929	338
1:46123018-46123731|92.42|MACS_peak_391	107	139	23	83	23	132	52	127	18	23	41	29
1:46160972-46161676|142.05|MACS_peak_392	61	127	55	48	56	100	33	62	28	37	27	31
1:46166126-46166683|65.46|MACS_peak_393	14	37	12	70	9	82	11	24	7	12	9	20
1:46189570-46190003|64.35|MACS_peak_394	4	62	10	78	1	75	10	4	13	4	14	13
1:47057124-47057747|67.98|MACS_peak_75	119	152	120	116	80	92	96	211	106	164	120	101
1:47164014-47164914|61.54|MACS_peak_9	172	123	126	152	47	68	225	262	121	192	129	107
1:47164076-47164830|68.45|MACS_peak_76	164	114	122	143	45	63	215	256	113	182	120	104
1:47298115-47298737|57.71|MACS_peak_51	20	99	10	39	8	53	14	16	0	13	5	9
1:47341322-47342023|101.76|MACS_peak_395	37	69	4	60	11	126	29	43	26	7	16	14
1:47400239-47400881|82.96|MACS_peak_396	22	47	10	48	6	114	13	24	7	8	9	17
1:47445661-47446627|101.43|MACS_peak_397	63	208	92	275	139	322	60	178	93	118	112	113
1:47466330-47467301|459.08|MACS_peak_398	20	217	20	184	10	369	32	55	26	15	38	28
1:47466342-47467227|56.25|MACS_peak_52	20	215	18	181	10	367	31	54	23	13	37	26
1:47478889-47479589|130.73|MACS_peak_399	20	40	24	66	7	150	7	25	25	14	14	13
1:47485143-47485746|77.80|MACS_peak_400	3	54	10	53	5	102	2	6	12	11	4	17
1:47529401-47529996|89.85|MACS_peak_401	3	85	8	37	12	125	9	34	5	12	10	31
1:47641657-47642225|70.21|MACS_peak_53	9	112	14	38	7	122	9	13	7	12	15	18
1:47641672-47642340|99.86|MACS_peak_402	10	114	17	37	8	128	10	15	5	14	15	25
1:47665068-47666018|145.68|MACS_peak_403	13	175	6	160	14	347	64	117	38	24	91	28
1:47669274-47669821|85.25|MACS_peak_404	11	25	16	62	12	82	15	32	16	12	14	18
1:47700475-47700992|51.11|MACS_peak_54	16	64	23	65	6	92	12	19	10	14	22	15
1:47700558-47700962|86.10|MACS_peak_405	14	57	22	58	4	89	12	16	9	13	19	13
1:47705877-47706415|52.72|MACS_peak_406	28	98	43	82	19	79	26	48	30	51	21	20
1:47762547-47763063|73.71|MACS_peak_407	11	29	16	46	18	80	6	9	1	14	14	16
1:47919280-47919896|117.12|MACS_peak_408	54	160	19	76	11	137	48	87	6	13	21	29
1:48280152-48280639|96.05|MACS_peak_62	12	20	5	21	2	8	37	80	4	4	24	23
1:49097808-49098268|54.52|MACS_peak_409	14	39	15	43	11	79	17	23	8	25	5	19
1:50623204-50623828|56.74|MACS_peak_410	19	85	13	84	11	106	27	67	6	44	20	28
1:50629423-50630017|61.71|MACS_peak_63	47	70	42	82	39	54	70	150	76	84	129	56
1:50629462-50630022|54.32|MACS_peak_10	47	69	43	82	39	53	71	148	76	83	128	56
1:50637944-50638378|51.06|MACS_peak_411	3	43	8	58	3	86	8	12	15	8	7	9
1:50831433-50832185|59.65|MACS_peak_412	30	78	34	136	32	150	24	84	16	73	66	54
1:50915266-50915992|144.22|MACS_peak_413	18	78	25	81	5	169	37	53	7	17	7	21
1:50962977-50964128|667.63|MACS_peak_414	47	179	22	285	54	475	17	55	30	65	22	71
1:50963159-50963963|103.31|MACS_peak_28	35	158	15	238	47	447	17	48	26	52	18	47
1:50963291-50964056|78.47|MACS_peak_55	37	156	15	232	44	428	15	44	23	51	17	47
1:51064240-51065251|421.00|MACS_peak_415	28	117	35	117	43	272	16	44	18	19	26	37
1:51090039-51090865|223.53|MACS_peak_416	29	59	32	134	34	175	21	43	25	36	25	27
1:51096664-51097311|60.46|MACS_peak_77	102	165	138	87	90	103	63	156	74	143	89	94
1:51125403-51126151|127.72|MACS_peak_417	33	109	31	89	26	219	44	57	31	41	59	38
1:51148279-51149437|173.15|MACS_peak_418	165	405	235	374	235	700	113	258	110	240	208	198
1:51163532-51164180|86.12|MACS_peak_419	17	24	11	56	14	120	7	14	8	13	3	22
1:51189559-51190106|67.38|MACS_peak_420	8	69	10	106	15	88	13	19	16	35	12	34
1:51212529-51213275|149.15|MACS_peak_421	13	58	15	67	8	156	14	9	11	20	17	20
1:51240763-51241683|65.39|MACS_peak_56	30	155	25	116	15	181	22	43	39	26	41	42
1:51240996-51241760|81.85|MACS_peak_422	28	139	25	103	14	173	18	45	35	23	39	40
1:51272252-51273264|179.58|MACS_peak_423	44	199	7	127	25	229	39	64	28	20	48	35
1:51349093-51350196|121.82|MACS_peak_424	57	174	38	176	44	267	34	73	47	62	76	73
1:51477535-51479005|63.63|MACS_peak_78	1738	2750	2170	3195	2344	3046	2296	2796	1548	2123	3492	1477
1:51623212-51623874|83.44|MACS_peak_57	8	126	23	39	17	41	9	8	27	16	13	51
1:51628007-51628685|57.97|MACS_peak_425	28	45	30	103	32	91	21	48	41	38	39	44
1:51631220-51632037|132.19|MACS_peak_426	26	175	13	75	19	223	33	36	17	22	44	31
1:51631278-51631982|64.85|MACS_peak_58	25	172	13	68	17	212	30	36	15	20	42	28
1:51636108-51637214|77.66|MACS_peak_59	52	207	45	122	62	223	19	73	31	51	68	89
1:51636313-51637293|62.07|MACS_peak_427	43	198	39	109	61	209	20	61	29	50	66	72
1:51649998-51650987|116.69|MACS_peak_64	162	269	113	565	150	446	423	496	127	154	356	150
1:51722820-51723916|299.07|MACS_peak_428	49	158	34	219	20	319	20	38	27	31	27	49
1:51722930-51723803|113.51|MACS_peak_60	44	143	34	184	19	301	14	29	22	30	25	39
1:51746156-51746611|51.31|MACS_peak_429	9	64	19	103	6	92	12	17	13	8	2	25
1:51747407-51747982|53.73|MACS_peak_61	43	75	25	63	17	59	22	23	29	29	18	24
1:51829507-51830185|65.82|MACS_peak_430	45	42	25	92	26	108	33	40	37	43	30	33
1:51871249-51871755|59.90|MACS_peak_431	46	48	24	63	29	104	6	37	22	20	42	41
1:51886481-51887468|170.37|MACS_peak_432	53	116	54	200	41	263	44	80	30	37	70	41
1:51914765-51916357|144.90|MACS_peak_79	1401	2586	2044	3721	2123	2896	1283	2431	1163	2320	2571	1425
1:51929043-51930214|242.87|MACS_peak_433	94	280	118	268	105	343	31	140	74	106	74	86
1:52048325-52048581|50.72|MACS_peak_65	14	9	5	38	6	16	22	31	5	10	9	21
1:52105280-52106012|55.12|MACS_peak_66	79	57	30	27	30	49	106	175	36	48	57	40
1:52113304-52114194|87.02|MACS_peak_80	528	1050	636	1007	746	1100	758	863	519	575	1005	439
1:52131041-52131805|154.62|MACS_peak_434	37	50	26	94	25	171	7	19	10	22	6	24
1:52231844-52233966|155.37|MACS_peak_81	4018	5678	4757	6528	5670	5668	3884	6538	2982	4935	6204	3092
1:52305559-52307314|84.43|MACS_peak_67	350	350	160	435	236	401	437	708	123	197	355	232
1:52427753-52428530|222.33|MACS_peak_435	28	26	30	59	26	179	28	48	33	27	26	40
1:52499624-52501080|108.07|MACS_peak_82	1114	1964	1187	1949	1492	1890	1463	1815	834	1303	2326	940
1:52630363-52631350|123.77|MACS_peak_83	835	1528	957	1562	1052	1499	952	1217	657	863	1487	574
1:52676415-52677448|299.85|MACS_peak_436	40	229	35	153	33	300	31	24	31	22	29	21
1:52676438-52677323|156.80|MACS_peak_62	37	218	34	134	33	288	30	23	24	21	29	19
1:52799183-52800320|404.26|MACS_peak_437	58	125	52	221	73	399	49	46	26	60	49	65
1:52800631-52801937|607.59|MACS_peak_438	39	72	29	260	25	435	28	26	33	45	27	46
1:52816667-52818083|128.65|MACS_peak_84	1240	1769	1139	1927	1336	2000	1331	1600	836	1091	1861	797
1:52844464-52845667|127.91|MACS_peak_85	1639	1995	1629	2203	2021	2084	1952	2082	1213	1496	2656	1157
1:53034978-53035513|112.98|MACS_peak_439	19	88	15	65	13	108	11	15	6	20	16	14
1:53035044-53035466|83.46|MACS_peak_63	19	85	14	62	12	104	11	15	6	17	13	8
1:53060450-53061093|55.52|MACS_peak_440	43	62	22	83	15	131	39	45	11	35	31	39
1:53061268-53062325|189.55|MACS_peak_441	63	131	29	105	48	184	24	52	30	41	40	47
1:53075942-53076739|200.28|MACS_peak_442	38	100	18	97	20	206	25	28	20	36	29	37
1:53076083-53076655|55.31|MACS_peak_64	29	85	16	75	19	174	18	25	15	29	22	27
1:53209311-53209924|63.41|MACS_peak_443	19	44	8	24	18	92	15	18	4	19	14	29
1:53296547-53297735|121.35|MACS_peak_86	2347	3231	2397	3167	3164	3239	2532	3318	1901	2639	4067	1776
1:53313232-53314154|65.41|MACS_peak_87	441	826	362	765	385	787	417	549	337	367	663	294
1:53352132-53353134|154.67|MACS_peak_88	1158	1684	1171	1709	1380	1761	1386	1567	926	1022	2201	890
1:53393910-53394484|53.85|MACS_peak_65	65	52	24	68	27	50	29	30	35	32	43	42
1:53635980-53636806|81.72|MACS_peak_66	93	155	25	64	28	73	34	50	10	29	29	42
1:53706229-53707223|55.84|MACS_peak_89	570	863	454	929	437	1034	532	662	374	497	881	350
1:53709409-53710837|252.46|MACS_peak_444	128	301	85	282	98	374	84	211	76	107	75	87
1:53811763-53812314|96.75|MACS_peak_90	101	75	69	28	86	56	82	104	52	46	52	74
1:53844023-53845204|63.16|MACS_peak_445	83	148	48	342	81	347	173	204	87	103	111	100
1:53889642-53890381|200.16|MACS_peak_446	25	77	13	57	10	187	26	47	19	8	24	9
1:53982637-53984107|235.08|MACS_peak_447	111	209	130	378	91	380	60	95	144	144	99	89
1:53982748-53984039|85.42|MACS_peak_67	104	205	123	363	82	373	59	93	142	139	95	83
1:54090798-54091960|144.30|MACS_peak_448	131	204	63	157	85	251	45	138	31	90	77	75
1:54132992-54135256|67.25|MACS_peak_449	266	596	193	569	220	656	188	337	115	282	237	216
1:54159238-54159992|99.90|MACS_peak_68	32	186	25	75	27	193	9	41	16	34	12	23
1:54159241-54160004|233.03|MACS_peak_450	32	187	26	76	27	193	9	41	16	34	12	23
1:54193894-54195534|187.53|MACS_peak_91	2668	3918	3105	4434	3552	3775	2599	4051	1921	3354	4493	2061
1:54193902-54195585|53.23|MACS_peak_68	2669	3921	3109	4442	3554	3784	2601	4051	1923	3360	4495	2064
1:54250169-54251230|75.29|MACS_peak_92	1100	1649	1012	1793	1142	1711	1387	1538	835	1065	1825	748
1:54285806-54286516|133.18|MACS_peak_451	27	69	22	68	26	112	10	20	12	40	18	29
1:54588427-54589219|68.10|MACS_peak_452	202	202	14	169	31	174	196	261	23	26	60	52
1:54690230-54691165|180.79|MACS_peak_69	117	143	34	85	79	159	324	413	46	67	261	116
1:54690245-54691139|50.80|MACS_peak_11	116	137	33	80	76	157	321	406	45	65	260	113
1:54706548-54708676|96.55|MACS_peak_453	192	415	145	391	166	753	234	342	125	170	293	168
1:54815198-54815886|57.49|MACS_peak_70	90	35	24	65	58	50	67	139	14	31	90	67
1:54823681-54824655|143.18|MACS_peak_454	58	61	28	166	34	189	22	45	21	55	43	44
1:55052094-55053479|75.74|MACS_peak_93	2323	3390	2915	4012	3346	3667	2718	3705	1794	2917	4117	1816
1:55195567-55196035|66.81|MACS_peak_94	61	84	53	45	48	67	38	44	52	45	60	30
1:55226115-55227086|104.49|MACS_peak_455	87	194	87	220	114	219	103	125	63	120	87	83
1:55472567-55473305|126.19|MACS_peak_456	37	66	62	203	20	152	19	41	32	45	12	33
1:55581622-55582609|243.91|MACS_peak_457	55	105	37	216	39	306	47	107	41	50	44	55
1:55676508-55678316|51.96|MACS_peak_458	101	221	70	278	128	429	147	308	90	166	156	163
1:55676915-55677532|63.04|MACS_peak_71	52	112	31	118	44	258	77	178	35	65	82	76
1:55693977-55694862|210.74|MACS_peak_459	30	70	33	193	25	187	18	54	29	23	24	37
1:55796879-55797507|104.33|MACS_peak_460	6	24	10	102	9	143	6	15	14	18	5	22
1:55887290-55888094|154.71|MACS_peak_461	50	97	41	199	50	312	42	94	51	43	91	58
1:55947521-55948393|140.50|MACS_peak_462	59	75	20	130	15	263	135	212	15	23	64	38
1:55947625-55948246|107.46|MACS_peak_72	57	73	18	123	13	245	130	201	13	18	61	35
1:56226606-56227066|59.75|MACS_peak_12	78	66	23	32	39	18	37	74	15	13	87	33
1:56302000-56302922|249.67|MACS_peak_463	36	49	24	59	23	222	10	25	14	16	22	40
1:56340026-56340762|126.68|MACS_peak_464	15	64	9	89	27	160	10	29	8	16	14	32
1:56342109-56343186|400.29|MACS_peak_465	22	98	13	137	49	296	14	30	9	23	21	18
1:56344898-56345697|231.91|MACS_peak_466	70	158	23	116	52	316	57	85	30	40	57	52
1:56354685-56355343|88.46|MACS_peak_467	19	18	2	65	11	117	7	12	10	12	9	28
1:56612105-56612818|93.66|MACS_peak_73	58	24	23	41	12	25	97	159	12	43	71	54
1:56612186-56612591|61.30|MACS_peak_13	42	18	16	30	11	19	66	125	11	34	56	43
1:56675072-56675715|64.18|MACS_peak_468	21	47	19	69	15	110	34	15	22	18	27	30
1:56749476-56750043|54.71|MACS_peak_69	47	63	20	82	34	78	14	26	16	29	44	42
1:56814993-56816290|126.66|MACS_peak_469	67	415	47	506	31	605	171	182	60	48	188	59
1:56815021-56816225|110.12|MACS_peak_29	64	402	45	500	31	602	169	178	60	47	187	58
1:56833926-56834830|100.56|MACS_peak_470	61	112	42	204	56	264	71	191	52	46	66	77
1:56834041-56834715|52.73|MACS_peak_74	48	100	38	181	50	250	66	174	47	37	56	66
1:56925322-56925874|70.69|MACS_peak_471	12	80	8	29	6	87	6	17	11	12	7	25
1:56928392-56929301|138.25|MACS_peak_472	40	95	34	131	53	224	23	43	32	35	32	94
1:56933148-56934893|206.62|MACS_peak_473	116	324	37	284	79	746	144	241	43	88	159	106
1:56958104-56958610|54.30|MACS_peak_474	10	30	9	35	6	104	22	23	12	41	24	19
1:57213230-57214104|81.31|MACS_peak_475	56	226	40	233	37	296	54	109	43	79	109	73
1:57224748-57225070|66.63|MACS_peak_14	25	8	3	20	2	17	33	22	5	14	64	20
1:57377235-57378513|57.93|MACS_peak_95	1524	2510	1706	2755	1917	2484	1532	2312	1109	1660	2446	1188
1:57594647-57595251|93.76|MACS_peak_75	49	63	64	152	91	140	109	207	79	80	151	79
1:57741175-57742256|132.52|MACS_peak_476	127	156	71	174	85	345	72	104	52	62	134	96
1:57805455-57806468|116.92|MACS_peak_76	102	56	46	126	30	46	81	215	37	50	98	87
1:57835024-57835602|92.24|MACS_peak_477	12	32	22	82	25	96	6	20	7	23	12	23
1:57864406-57864673|50.29|MACS_peak_77	6	16	6	15	4	9	24	36	9	19	13	21
1:57875089-57876177|110.12|MACS_peak_96	535	537	357	447	472	405	504	782	294	310	696	330
1:57939870-57942190|123.15|MACS_peak_478	244	378	149	667	248	739	150	229	187	236	247	248
1:57961503-57962468|203.73|MACS_peak_479	20	138	25	125	25	205	31	37	27	49	9	34
1:57961723-57962346|63.52|MACS_peak_70	13	130	17	100	19	185	28	31	21	36	6	26
1:57995532-57996412|75.58|MACS_peak_97	667	1133	570	1223	728	1141	734	778	440	648	1033	417
1:58047630-58048286|71.69|MACS_peak_480	39	70	17	122	27	129	28	33	33	23	27	36
1:58053825-58054364|91.56|MACS_peak_481	38	24	11	68	23	83	16	37	14	32	18	28
1:58253312-58253947|82.28|MACS_peak_482	16	61	19	79	12	108	18	16	11	9	15	47
1:58280882-58281760|89.98|MACS_peak_483	28	98	39	72	47	114	27	18	28	26	20	36
1:58309438-58310328|92.50|MACS_peak_484	19	21	31	74	32	128	16	26	23	37	24	51
1:58407318-58409056|87.67|MACS_peak_485	61	280	144	457	146	284	61	194	74	167	116	152
1:58444880-58446140|53.68|MACS_peak_98	765	1233	875	1285	1046	1257	711	1121	449	817	1136	638
1:58713000-58713817|59.39|MACS_peak_486	115	169	83	234	76	250	73	125	65	111	118	78
1:58972851-58974359|60.05|MACS_peak_99	2020	3201	2260	3827	2753	3025	1925	2856	1287	2605	3221	1532
1:59253229-59254045|52.03|MACS_peak_487	65	186	92	207	99	183	74	109	54	103	90	81
1:59256431-59257577|58.49|MACS_peak_488	113	195	111	309	149	404	102	156	71	129	170	129
1:59271932-59272887|291.24|MACS_peak_489	64	184	25	139	32	236	21	73	31	29	24	38
1:59291873-59292377|80.98|MACS_peak_490	11	26	9	50	11	89	11	15	19	23	9	28
1:59316064-59317191|112.26|MACS_peak_491	106	236	105	272	79	308	88	168	52	108	126	94
1:59321714-59322531|60.60|MACS_peak_492	51	133	79	175	58	118	40	60	61	68	36	57
1:59332786-59334732|69.64|MACS_peak_493	178	276	126	389	197	406	136	246	107	208	195	162
1:59367725-59368778|56.24|MACS_peak_494	104	165	128	206	114	251	73	113	97	151	125	108
1:59387751-59388327|53.53|MACS_peak_71	38	80	30	50	40	50	19	31	16	17	31	36
1:59409532-59410121|85.16|MACS_peak_495	10	69	16	57	18	90	4	28	9	18	12	24
1:59448979-59450070|58.29|MACS_peak_496	89	183	79	279	78	217	69	142	42	110	87	97
1:59458724-59459390|84.70|MACS_peak_497	25	114	31	79	40	101	36	43	29	31	25	46
1:59466269-59466899|63.68|MACS_peak_498	8	40	5	71	13	112	14	23	13	25	12	32
1:59473082-59473680|68.01|MACS_peak_499	21	92	19	98	8	117	39	35	27	28	31	25
1:59519659-59521015|55.30|MACS_peak_500	47	139	94	366	80	277	68	136	61	115	91	97
1:59535232-59535812|61.19|MACS_peak_78	71	70	29	76	93	75	129	145	56	50	145	95
1:59578834-59579600|77.14|MACS_peak_501	14	34	18	65	13	137	17	26	20	21	29	33
1:59579838-59580891|342.47|MACS_peak_502	29	81	36	175	59	282	31	55	35	72	26	66
1:59775580-59776263|70.09|MACS_peak_503	33	78	50	112	43	111	18	45	14	46	23	49
1:59848334-59848929|83.88|MACS_peak_504	12	53	25	51	15	122	19	47	21	18	19	28
1:60179935-60181172|152.47|MACS_peak_100	1902	3245	2801	3559	3246	3137	1790	3198	1258	2934	3138	1656
1:60285750-60286261|50.87|MACS_peak_505	17	23	37	70	37	49	13	26	16	41	24	23
1:60510451-60511106|132.35|MACS_peak_506	13	47	32	77	29	141	3	18	4	12	15	32
1:60627328-60628347|50.57|MACS_peak_507	50	122	67	195	60	214	47	88	44	38	92	85
1:60639769-60641015|160.44|MACS_peak_508	35	123	42	144	40	263	52	106	43	60	59	67
1:60641285-60642185|96.39|MACS_peak_509	137	212	58	101	55	192	79	205	56	120	67	62
1:60648764-60650027|95.85|MACS_peak_510	94	202	47	164	61	312	64	217	32	52	100	77
1:60715406-60715975|50.52|MACS_peak_72	46	95	28	43	31	57	24	29	18	22	10	17
1:60850786-60851873|166.16|MACS_peak_511	108	283	98	185	137	365	55	213	50	84	118	113
1:60922939-60923613|98.54|MACS_peak_512	11	62	6	49	9	123	22	46	6	12	8	16
1:61090596-61091508|221.31|MACS_peak_513	37	168	34	157	45	282	29	80	23	47	43	41
1:61099010-61100208|139.56|MACS_peak_514	120	213	48	197	64	336	95	194	46	92	86	99
1:61111512-61112683|471.97|MACS_peak_515	37	272	12	128	26	386	33	52	19	35	11	52
1:61111540-61112620|158.91|MACS_peak_73	37	268	12	125	25	377	33	51	18	32	11	50
1:61130085-61131017|64.32|MACS_peak_516	38	154	29	120	56	136	31	106	9	41	44	50
1:61144971-61146592|365.87|MACS_peak_517	61	256	84	373	104	508	41	112	59	162	49	125
1:61203404-61204197|94.09|MACS_peak_518	34	94	57	140	38	180	30	60	35	53	60	62
1:61293267-61293946|55.33|MACS_peak_519	29	72	23	89	24	129	16	41	9	37	30	35
1:61294984-61295710|65.66|MACS_peak_520	33	79	18	115	41	138	26	54	5	39	29	54
1:61337899-61339078|77.85|MACS_peak_521	149	246	87	213	143	279	66	225	49	112	149	122
1:61358068-61359765|169.74|MACS_peak_522	91	283	129	458	157	521	66	189	78	133	165	142
1:61376796-61377530|55.79|MACS_peak_523	91	176	77	161	74	165	59	144	31	84	63	68
1:61379240-61380275|194.18|MACS_peak_524	27	106	33	173	36	266	28	73	28	38	54	68
1:61397804-61398268|60.13|MACS_peak_15	37	38	27	55	41	20	41	90	30	43	63	42
1:61397854-61398226|78.50|MACS_peak_79	34	33	26	48	35	16	36	85	25	40	59	37
1:61406894-61407859|63.44|MACS_peak_525	91	234	112	392	128	276	94	265	59	179	155	165
1:61411419-61412220|87.18|MACS_peak_526	81	121	16	91	40	171	51	105	13	7	45	49
1:61470541-61471395|213.84|MACS_peak_527	29	79	46	156	56	269	35	109	17	57	35	55
1:61537117-61537593|73.29|MACS_peak_528	17	38	2	36	5	81	2	14	2	2	17	10
1:61552428-61553867|133.13|MACS_peak_529	231	685	242	686	334	997	268	504	136	232	348	255
1:61651375-61652450|121.54|MACS_peak_530	31	43	33	125	38	168	16	23	20	47	17	52
1:61657506-61658458|503.37|MACS_peak_531	21	86	24	152	21	360	23	33	11	12	18	45
1:61659368-61660367|439.60|MACS_peak_532	20	34	26	128	30	314	6	9	21	42	2	35
1:61663990-61665293|520.53|MACS_peak_533	34	99	66	209	69	433	3	45	32	30	29	59
1:61685159-61685776|75.38|MACS_peak_534	23	82	22	114	12	130	15	57	20	47	35	26
1:61713273-61714211|274.02|MACS_peak_535	43	111	60	286	84	342	35	81	25	99	55	69
1:61713358-61714164|61.67|MACS_peak_30	43	105	52	277	83	336	34	78	25	97	54	68
1:61764163-61764597|51.06|MACS_peak_536	13	41	22	81	10	63	12	29	10	34	18	12
1:61900951-61901587|91.38|MACS_peak_537	11	54	18	87	27	108	6	37	3	20	21	31
1:61925571-61926167|79.22|MACS_peak_538	17	52	21	66	18	95	4	34	12	24	8	33
1:61939282-61940510|122.24|MACS_peak_539	65	256	76	318	60	415	106	207	78	125	121	109
1:61967263-61968463|99.21|MACS_peak_540	86	266	55	246	67	452	69	278	57	74	135	132
1:61978204-61978953|148.35|MACS_peak_541	10	73	18	96	33	134	10	28	4	19	0	7
1:61989859-61990907|422.09|MACS_peak_542	40	198	52	230	63	427	31	107	18	77	51	47
1:61997615-61998432|82.82|MACS_peak_543	31	91	24	138	72	209	48	90	57	50	57	94
1:62011785-62012078|71.10|MACS_peak_80	3	14	4	14	14	28	27	44	0	12	22	21
1:62016734-62017337|76.79|MACS_peak_74	20	124	21	48	30	128	4	26	14	27	10	20
1:62016779-62017430|99.03|MACS_peak_544	20	126	21	51	27	130	5	26	15	28	11	21
1:62019719-62020995|755.42|MACS_peak_545	22	116	18	226	48	541	15	31	14	39	25	78
1:62055267-62055621|71.42|MACS_peak_81	5	16	10	28	5	8	26	49	23	17	47	25
1:62063886-62064457|108.57|MACS_peak_546	15	24	12	51	12	123	9	26	3	22	12	14
1:62181481-62182343|103.89|MACS_peak_547	54	73	47	144	26	205	30	94	17	75	30	60
1:62190684-62191600|108.30|MACS_peak_82	86	149	77	313	71	174	104	291	55	165	132	121
1:62197508-62198009|72.40|MACS_peak_548	19	46	21	57	17	76	12	57	11	23	20	22
1:62201069-62201680|59.82|MACS_peak_549	15	35	8	43	4	99	2	6	0	11	8	9
1:62214859-62215446|81.09|MACS_peak_550	19	55	23	96	26	83	41	82	25	45	20	28
1:62279502-62280298|208.14|MACS_peak_551	15	109	15	203	29	199	40	48	20	50	31	28
1:62328644-62329270|69.15|MACS_peak_552	4	31	14	51	10	102	4	32	13	30	15	17
1:62341180-62341883|158.08|MACS_peak_553	15	72	14	119	24	156	15	52	9	24	22	39
1:62355251-62356165|92.36|MACS_peak_554	47	120	10	215	27	200	34	115	24	31	59	42
1:62355282-62356080|80.96|MACS_peak_31	44	112	9	197	27	176	33	105	22	27	58	40
1:62398205-62398643|66.08|MACS_peak_83	12	22	19	43	14	57	27	71	20	55	43	51
1:62429288-62429809|51.70|MACS_peak_555	26	35	7	54	28	83	13	42	6	16	18	24
1:62480328-62481251|129.10|MACS_peak_556	24	206	38	163	25	284	73	67	43	68	71	61
1:62489054-62489738|63.74|MACS_peak_75	35	121	9	70	10	70	30	34	17	20	19	28
1:62513388-62514597|298.49|MACS_peak_557	119	381	110	281	161	553	92	292	42	140	84	115
1:62518049-62519505|250.00|MACS_peak_558	37	329	35	385	38	503	58	130	55	84	119	74
1:62518266-62519329|82.07|MACS_peak_32	32	305	28	346	33	482	46	119	48	74	106	65
1:62568823-62570273|860.69|MACS_peak_559	38	243	24	338	37	877	42	50	18	44	62	66
1:62568931-62570055|141.43|MACS_peak_76	37	230	23	316	36	838	41	43	16	38	57	62
1:62569034-62570002|108.34|MACS_peak_33	36	226	20	308	35	819	34	40	16	36	54	60
1:62582758-62583450|127.76|MACS_peak_560	16	50	14	60	12	163	13	45	4	18	15	22
1:62594498-62595124|81.85|MACS_peak_561	21	88	16	118	24	115	4	8	15	13	10	8
1:62599556-62600342|124.39|MACS_peak_562	21	33	33	48	17	137	15	46	34	52	19	33
1:62612666-62613503|337.04|MACS_peak_563	49	120	36	137	23	300	47	100	21	43	42	45
1:62617867-62619328|193.87|MACS_peak_564	94	286	139	423	111	522	56	187	47	121	108	139
1:62628573-62629001|52.19|MACS_peak_565	7	4	14	25	12	65	2	6	9	16	1	10
1:62647639-62648785|150.41|MACS_peak_566	66	203	93	298	74	384	54	139	72	140	100	116
1:62665647-62666246|106.49|MACS_peak_567	28	23	23	62	9	142	4	15	12	17	8	29
1:62682144-62684057|215.38|MACS_peak_568	254	546	249	804	223	902	214	363	169	282	322	205
1:62696746-62698023|74.74|MACS_peak_569	87	206	96	244	107	332	88	159	60	122	111	104
1:62701020-62701726|61.38|MACS_peak_570	104	244	151	301	138	280	89	188	93	157	139	108
1:62737271-62738109|123.93|MACS_peak_571	24	54	32	103	43	167	17	43	22	35	15	60
1:62743039-62743913|56.61|MACS_peak_572	38	55	21	104	57	151	33	52	33	83	27	99
1:62747653-62748380|54.02|MACS_peak_573	15	37	24	92	26	171	10	37	32	20	22	29
1:62750988-62752772|62.63|MACS_peak_574	174	488	219	774	255	759	190	447	120	324	312	290
1:62776957-62778118|164.66|MACS_peak_575	93	199	100	388	72	469	84	159	57	139	107	106
1:62783240-62784182|63.92|MACS_peak_84	109	171	68	226	163	235	203	285	94	144	232	178
1:62794100-62795258|61.43|MACS_peak_576	96	198	149	320	161	264	93	186	49	170	109	144
1:62801832-62802123|53.09|MACS_peak_85	14	23	10	44	19	16	17	53	3	20	9	47
1:62827787-62828685|152.83|MACS_peak_577	43	132	46	140	74	281	36	53	37	79	69	83
1:62932364-62933848|171.26|MACS_peak_578	102	167	81	259	83	285	40	102	36	69	64	83
1:62942877-62943950|374.46|MACS_peak_579	30	135	89	302	57	480	30	59	32	78	36	86
1:62967538-62968405|57.06|MACS_peak_86	94	106	54	79	52	65	70	200	30	60	95	85
1:62983774-62984977|263.29|MACS_peak_580	92	263	74	141	95	318	46	102	54	102	69	82
1:62983808-62984915|65.98|MACS_peak_77	86	260	69	136	92	308	46	101	50	95	69	79
1:63113321-63114935|52.27|MACS_peak_101	633	1614	1120	1928	1202	1582	634	1454	479	1191	996	838
1:63213483-63215127|77.97|MACS_peak_581	107	272	115	317	105	345	116	231	41	153	130	114
1:63246785-63247646|70.41|MACS_peak_582	122	264	235	283	233	311	114	288	131	213	193	170
1:63247662-63248875|53.73|MACS_peak_583	86	213	116	311	138	289	77	192	58	118	103	166
1:63252233-63253374|70.03|MACS_peak_584	35	140	82	368	93	225	72	138	54	109	99	109
1:63368868-63369602|96.12|MACS_peak_585	12	89	14	100	16	150	17	43	12	20	15	42
1:63417807-63419321|68.79|MACS_peak_586	68	381	83	419	107	686	204	542	68	176	265	170
1:63417822-63419132|112.80|MACS_peak_87	59	377	81	413	105	669	203	537	68	172	263	166
1:63472334-63473271|51.30|MACS_peak_587	53	128	88	213	66	150	36	81	20	76	46	72
1:63508715-63509284|79.53|MACS_peak_588	22	86	14	87	16	100	14	47	13	15	24	30
1:63544800-63545675|101.18|MACS_peak_589	18	28	35	53	37	111	8	51	21	31	14	44
1:63573008-63574757|133.78|MACS_peak_590	199	359	176	449	187	555	161	393	70	161	206	192
1:63578700-63579541|84.51|MACS_peak_78	20	122	10	45	12	81	13	16	20	15	10	22
1:63603825-63604407|85.37|MACS_peak_591	16	61	22	45	15	106	10	44	19	22	23	20
1:63667095-63667787|99.22|MACS_peak_16	19	40	12	52	12	45	127	91	34	16	151	50
1:63667813-63669211|90.48|MACS_peak_592	212	407	136	467	247	502	223	402	109	183	355	168
1:63729808-63731105|61.52|MACS_peak_593	194	617	208	655	281	596	202	345	115	255	254	188
1:63762989-63764499|52.57|MACS_peak_594	153	294	181	361	154	313	141	220	71	166	167	158
1:63785620-63786277|67.89|MACS_peak_595	40	113	36	58	27	105	40	98	25	75	32	34
1:63808322-63809549|129.96|MACS_peak_596	51	170	29	222	18	347	170	226	100	159	116	66
1:63808403-63809364|59.23|MACS_peak_88	44	162	25	203	16	326	159	220	90	145	109	56
1:63850760-63851395|87.08|MACS_peak_597	11	68	7	60	5	139	25	24	18	17	50	23
1:63927082-63927589|77.09|MACS_peak_89	21	33	10	61	8	47	47	89	43	40	34	24
1:63976615-63978579|391.36|MACS_peak_598	83	387	86	473	58	734	94	272	77	134	167	128
1:63993639-63995200|81.39|MACS_peak_599	131	275	125	468	121	437	74	160	56	155	120	143
1:63995681-63996295|71.39|MACS_peak_600	30	87	15	42	26	83	12	38	5	29	13	31
1:64027723-64028731|57.31|MACS_peak_601	59	141	99	249	74	141	84	97	65	101	63	83
1:64045959-64046897|210.07|MACS_peak_602	30	112	39	273	47	303	39	83	36	56	52	64
1:64046048-64046880|54.75|MACS_peak_34	28	103	36	254	47	289	37	74	35	48	50	58
1:64053442-64054003|55.15|MACS_peak_603	5	25	12	63	13	75	9	23	7	19	19	26
1:64078574-64079451|229.60|MACS_peak_604	29	95	69	217	53	344	31	57	22	63	51	70
1:64083189-64084288|142.03|MACS_peak_605	40	173	61	243	33	253	38	94	20	56	56	70
1:64083570-64084247|52.73|MACS_peak_35	30	129	37	176	25	184	31	76	18	46	42	50
1:64097582-64098348|120.25|MACS_peak_606	28	103	95	200	66	200	13	60	42	81	38	63
1:64115630-64117327|283.45|MACS_peak_607	83	258	64	305	74	496	52	123	49	89	106	126
1:64156159-64156904|64.24|MACS_peak_79	112	184	57	59	56	63	54	89	21	38	33	52
1:64164490-64165084|72.41|MACS_peak_90	31	40	54	41	41	23	90	123	40	65	100	69
1:64164608-64165106|64.82|MACS_peak_17	29	40	51	39	40	17	81	117	37	58	93	67
1:64173451-64174310|63.50|MACS_peak_608	59	144	91	210	92	217	90	138	51	96	102	95
1:64191251-64192305|439.75|MACS_peak_609	46	288	51	346	63	606	48	119	57	45	107	80
1:64223566-64224399|73.56|MACS_peak_610	50	200	29	135	31	207	27	67	19	47	45	61
1:64223607-64224567|59.49|MACS_peak_80	54	215	35	153	36	239	29	77	19	51	50	67
1:64288699-64289846|58.17|MACS_peak_611	266	395	197	457	322	738	273	395	138	254	403	265
1:64305238-64305993|67.06|MACS_peak_612	40	67	44	92	49	93	30	63	26	55	27	59
1:64308618-64309475|409.58|MACS_peak_613	36	132	29	111	40	342	22	35	7	22	24	48
1:64308758-64309396|52.07|MACS_peak_81	32	122	23	99	36	314	18	34	6	20	21	38
1:64310933-64311895|237.43|MACS_peak_614	44	175	46	223	26	308	59	88	25	52	38	58
1:64336875-64338936|74.47|MACS_peak_615	279	661	264	832	313	839	169	496	92	282	300	313
1:64352757-64353891|493.69|MACS_peak_616	55	205	33	258	82	583	90	140	46	34	113	65
1:64365855-64368265|265.72|MACS_peak_617	168	472	217	539	194	898	84	335	59	230	213	277
1:64374292-64375128|118.40|MACS_peak_618	10	39	38	97	23	158	14	31	22	30	18	51
1:64380948-64381931|82.92|MACS_peak_619	93	238	129	272	105	225	50	151	64	149	78	98
1:64408826-64409717|120.66|MACS_peak_620	46	102	53	197	25	239	32	109	13	26	56	61
1:64440158-64440878|236.31|MACS_peak_621	10	72	15	176	4	208	4	24	6	34	2	44
1:64440196-64440803|52.79|MACS_peak_36	10	66	14	164	3	203	4	18	4	31	2	36
1:64442262-64443064|79.69|MACS_peak_622	34	146	84	238	53	176	21	79	33	72	32	49
1:64634115-64634812|102.63|MACS_peak_623	27	79	9	44	14	131	19	28	10	29	11	19
1:64638199-64639166|298.99|MACS_peak_624	28	148	36	164	24	284	22	56	20	20	26	35
1:64638453-64639036|68.10|MACS_peak_82	20	129	26	138	16	247	15	46	16	11	23	21
1:64666335-64667772|534.59|MACS_peak_625	28	113	43	206	44	513	35	62	24	43	50	59
1:64829327-64830166|271.07|MACS_peak_626	26	173	18	151	20	288	54	62	61	27	52	30
1:64866019-64866631|127.99|MACS_peak_91	17	23	45	75	37	57	38	110	28	43	45	43
1:64915572-64916139|164.24|MACS_peak_627	29	50	12	41	17	131	9	23	13	14	17	24
1:64945300-64945814|69.66|MACS_peak_628	20	13	14	50	19	76	5	27	7	16	9	24
1:64980651-64981308|85.05|MACS_peak_629	17	84	16	36	10	141	18	46	8	20	20	21
1:65186099-65187310|74.94|MACS_peak_102	1311	2495	1932	2726	2324	2604	1698	2334	1040	2008	2429	1261
1:65308410-65308950|53.17|MACS_peak_83	29	58	20	38	13	58	6	23	8	21	17	13
1:66132259-66132600|51.57|MACS_peak_92	21	9	7	13	12	11	25	46	4	7	5	16
1:66132656-66132931|55.07|MACS_peak_93	10	4	14	9	11	5	12	37	2	7	8	3
1:66177368-66178399|79.90|MACS_peak_630	38	232	91	270	100	405	76	182	43	92	86	72
1:66194903-66195875|106.52|MACS_peak_631	60	180	69	294	72	248	74	155	28	79	58	103
1:66194945-66195790|54.73|MACS_peak_37	58	174	68	285	71	244	71	151	27	75	57	99
1:66216846-66217537|128.02|MACS_peak_632	10	60	8	39	6	151	7	40	10	16	6	33
1:66218644-66219357|86.06|MACS_peak_633	15	50	19	63	16	134	5	20	14	18	2	27
1:66226030-66227535|941.03|MACS_peak_634	47	461	62	345	44	708	30	103	41	52	45	75
1:66226127-66227441|221.94|MACS_peak_84	46	454	60	332	40	695	30	99	41	52	43	70
1:66226153-66226976|63.22|MACS_peak_38	30	336	39	263	26	527	27	69	33	37	33	46
1:66235297-66236103|176.21|MACS_peak_635	24	128	38	135	24	181	16	41	17	11	25	28
1:66244685-66245543|407.88|MACS_peak_636	18	61	23	159	27	288	7	30	46	43	4	48
1:66248556-66249142|56.42|MACS_peak_637	18	52	13	78	4	113	6	35	12	6	24	23
1:66249569-66250423|118.93|MACS_peak_638	51	135	27	153	38	186	33	98	16	31	49	47
1:66250426-66252468|156.15|MACS_peak_639	146	591	204	735	153	777	93	358	98	250	176	284
1:66282308-66283012|72.66|MACS_peak_39	31	115	29	218	40	238	30	58	24	53	32	56
1:66282390-66283190|247.64|MACS_peak_640	33	129	31	256	45	256	30	69	30	58	36	59
1:66308027-66309493|440.47|MACS_peak_641	41	179	60	343	51	362	22	69	23	79	35	68
1:66308538-66309420|76.68|MACS_peak_85	28	138	40	243	43	258	15	42	14	51	24	35
1:66308561-66309502|80.39|MACS_peak_40	28	143	39	247	46	260	15	43	14	55	25	42
1:66323139-66325566|74.23|MACS_peak_642	251	718	263	1171	300	933	197	508	91	338	266	290
1:66328533-66330467|55.77|MACS_peak_41	87	195	123	469	137	281	67	197	50	142	94	163
1:66329172-66329989|69.15|MACS_peak_643	35	81	61	203	55	142	24	92	17	63	45	70
1:66335634-66336550|65.33|MACS_peak_644	57	193	69	369	47	229	71	152	30	80	84	83
1:66335661-66337078|54.13|MACS_peak_42	72	272	112	471	56	286	79	194	38	107	108	131
1:66341377-66341879|55.02|MACS_peak_645	21	46	7	89	15	78	18	64	12	26	11	40
1:66342023-66342992|154.93|MACS_peak_646	25	194	35	210	31	234	33	77	23	55	35	67
1:66342144-66342866|63.35|MACS_peak_43	22	178	27	178	28	206	26	65	19	45	32	54
1:66348143-66350078|228.01|MACS_peak_647	142	377	132	416	119	491	100	257	96	115	110	162
1:66379387-66379940|93.33|MACS_peak_648	8	48	15	95	10	101	4	16	10	7	6	31
1:66395213-66395887|82.81|MACS_peak_649	17	53	15	114	23	99	18	61	12	22	8	42
1:66399403-66400118|54.69|MACS_peak_44	18	67	30	142	12	72	6	25	8	44	18	41
1:66405849-66406921|99.78|MACS_peak_650	43	99	38	202	33	168	32	77	23	60	16	45
1:66407088-66408092|81.71|MACS_peak_651	191	400	116	399	183	366	115	333	46	182	128	175
1:66445358-66446452|52.95|MACS_peak_652	55	176	85	244	92	196	53	159	71	109	66	105
1:66448498-66450566|116.66|MACS_peak_653	130	369	213	571	185	403	130	260	80	217	122	242
1:66452868-66454298|94.49|MACS_peak_654	78	211	110	376	99	512	111	295	89	153	181	155
1:66453111-66454072|55.06|MACS_peak_94	64	184	90	312	87	455	94	251	79	135	160	135
1:66457678-66458170|52.77|MACS_peak_655	7	24	19	42	12	85	13	18	10	33	20	19
1:66833356-66834785|433.34|MACS_peak_656	42	162	68	255	67	537	32	99	33	84	49	82
1:66861667-66862361|56.35|MACS_peak_657	21	104	53	143	24	145	15	49	16	33	37	35
1:66933659-66934582|436.62|MACS_peak_658	17	197	22	199	15	361	60	41	22	29	52	37
1:66933743-66934533|117.83|MACS_peak_86	17	186	20	183	14	340	56	35	21	26	51	29
1:67003550-67004144|75.38|MACS_peak_659	19	79	24	83	6	129	26	44	21	28	23	33
1:67038340-67039190|75.01|MACS_peak_103	630	1409	787	1511	877	1438	824	1045	456	784	1275	611
1:67065274-67066616|99.00|MACS_peak_87	67	296	72	350	51	678	26	87	45	81	33	71
1:67065295-67066778|893.72|MACS_peak_660	68	317	75	354	51	697	26	90	43	82	33	75
1:67096388-67097063|65.87|MACS_peak_88	18	101	30	46	11	137	43	15	15	15	22	21
1:67096419-67097075|112.09|MACS_peak_661	17	101	29	45	11	134	44	15	15	14	21	22
1:67124796-67125350|61.54|MACS_peak_89	13	111	5	21	4	102	4	13	8	22	0	31
1:67138311-67139636|294.63|MACS_peak_662	93	253	74	322	80	506	96	240	63	131	109	101
1:67140570-67142091|521.28|MACS_peak_663	44	383	62	543	56	850	63	163	59	117	97	75
1:67140711-67141799|102.20|MACS_peak_45	40	372	53	505	43	799	57	149	56	107	91	65
1:67143686-67144295|53.18|MACS_peak_664	16	65	22	67	18	94	37	47	9	21	37	25
1:67145362-67146213|281.45|MACS_peak_665	24	96	42	107	36	240	26	55	13	36	32	54
1:67186044-67186548|52.80|MACS_peak_90	21	68	5	15	2	5	12	16	9	2	5	14
1:67362102-67362661|69.30|MACS_peak_666	8	15	16	45	2	93	20	40	14	13	15	18
1:67385278-67385732|52.73|MACS_peak_18	16	33	23	89	25	32	46	38	25	22	50	57
1:67429860-67430514|54.26|MACS_peak_95	54	58	30	65	25	62	60	127	16	36	49	46
1:67463911-67464513|137.42|MACS_peak_96	29	20	30	63	13	44	39	92	19	46	42	39
1:67465255-67466089|162.08|MACS_peak_667	42	100	61	206	93	305	56	93	31	88	101	52
1:67476783-67478140|64.61|MACS_peak_91	178	464	200	553	176	596	68	216	64	195	133	146
1:67476822-67478346|161.63|MACS_peak_668	192	482	206	594	180	612	71	223	69	195	137	151
1:67631500-67632096|79.22|MACS_peak_669	12	82	11	53	6	101	15	24	1	4	19	16
1:67760518-67761053|61.27|MACS_peak_670	4	27	6	23	7	76	8	15	4	11	8	14
1:67769752-67770079|96.30|MACS_peak_97	13	14	4	24	7	22	40	61	12	21	26	24
1:68047021-68048259|79.47|MACS_peak_671	99	423	172	491	177	511	68	304	80	210	180	208
1:68074370-68075035|54.11|MACS_peak_672	18	54	18	81	22	90	11	59	11	16	32	40
1:68081732-68082237|68.12|MACS_peak_98	17	44	23	57	10	136	51	102	12	33	39	41
1:68089564-68090283|68.97|MACS_peak_673	48	74	42	171	39	128	30	93	15	58	53	32
1:68115555-68116170|50.85|MACS_peak_674	17	88	69	70	35	82	18	40	21	40	31	31
1:68278773-68279312|87.08|MACS_peak_675	16	69	1	48	4	106	31	44	2	9	27	7
1:68487822-68488503|146.08|MACS_peak_676	8	50	21	131	24	139	22	28	13	18	27	20
1:68632142-68632696|66.62|MACS_peak_677	30	65	14	117	20	124	44	81	11	23	32	37
1:68748991-68749495|56.50|MACS_peak_99	18	52	39	101	34	76	86	119	30	67	88	34
1:68782522-68783448|94.75|MACS_peak_678	20	69	19	66	32	166	21	81	27	36	24	82
1:68849924-68850385|54.33|MACS_peak_679	16	56	3	40	6	72	44	37	5	7	9	20
1:68864947-68866468|99.18|MACS_peak_680	111	355	116	476	116	680	143	322	38	160	188	149
1:68865056-68865904|62.54|MACS_peak_46	88	308	92	396	97	605	130	294	27	118	170	117
1:68928560-68929368|137.09|MACS_peak_681	15	66	26	143	18	198	57	49	20	23	64	42
1:69009661-69010609|53.83|MACS_peak_682	98	175	59	261	79	366	215	348	59	69	171	133
1:69009851-69010642|162.70|MACS_peak_100	94	165	56	253	71	346	207	332	62	61	155	127
1:69248763-69250265|231.73|MACS_peak_683	15	122	33	132	18	291	52	50	14	44	40	34
1:69388002-69388674|113.08|MACS_peak_684	22	69	25	126	25	110	11	37	14	24	6	30
1:69427533-69428391|139.14|MACS_peak_685	19	99	21	160	55	200	37	47	16	30	52	42
1:69603802-69604631|116.38|MACS_peak_92	20	245	20	75	11	227	39	52	31	21	19	37
1:69603867-69604609|236.39|MACS_peak_686	20	235	20	73	11	217	37	50	30	21	16	32
1:69657993-69658528|122.84|MACS_peak_687	11	49	23	64	19	111	20	45	13	32	18	28
1:69686991-69688042|79.30|MACS_peak_104	756	1526	962	1473	1011	1458	1328	1445	593	1057	1643	714
1:69789198-69789951|113.22|MACS_peak_688	34	67	18	97	16	150	12	13	17	10	4	35
1:69790193-69791305|114.78|MACS_peak_689	128	271	72	244	76	300	100	196	32	98	136	84
1:69826534-69827663|71.79|MACS_peak_690	242	484	294	824	271	629	166	256	147	280	330	199
1:70357984-70358754|88.52|MACS_peak_691	43	80	52	176	46	151	43	106	39	51	72	58
1:70358778-70359522|106.04|MACS_peak_692	18	84	37	126	17	138	17	50	13	62	37	27
1:70458893-70459382|61.64|MACS_peak_693	13	18	22	71	9	89	11	23	7	17	21	18
1:70526695-70527461|140.89|MACS_peak_694	6	68	23	99	7	162	18	24	23	15	25	33
1:70694430-70694913|65.74|MACS_peak_695	29	112	10	66	12	69	29	64	7	15	16	20
1:70883726-70884687|192.46|MACS_peak_696	35	165	48	193	71	340	17	96	26	44	70	84
1:70930402-70931147|149.42|MACS_peak_697	15	83	10	81	16	142	20	24	13	25	17	27
1:71003206-71003966|213.05|MACS_peak_698	64	117	22	128	26	209	55	47	27	28	48	17
1:71003260-71003916|54.70|MACS_peak_93	63	116	20	127	25	204	53	44	25	28	47	16
1:71016580-71017072|66.10|MACS_peak_101	32	75	56	60	35	57	67	122	24	64	39	54
1:71032261-71032967|113.97|MACS_peak_699	25	41	10	72	20	133	8	15	11	18	18	33
1:71109365-71110457|176.82|MACS_peak_700	65	275	59	224	41	330	63	116	31	113	82	57
1:71117148-71117720|75.36|MACS_peak_701	14	91	8	46	21	91	9	30	17	12	13	27
1:71206255-71206868|93.64|MACS_peak_702	17	79	15	42	18	89	23	31	13	8	22	22
1:71348416-71349173|217.37|MACS_peak_703	29	77	13	122	8	199	22	24	5	14	12	15
1:71356587-71357533|376.00|MACS_peak_704	6	184	25	161	23	282	14	15	18	11	19	26
1:71356748-71357416|105.35|MACS_peak_94	3	171	20	142	20	270	14	13	14	9	18	19
1:71360078-71360687|85.39|MACS_peak_705	2	14	10	64	15	102	9	9	6	22	9	18
1:71524851-71525577|158.46|MACS_peak_706	26	99	20	75	24	191	6	56	6	18	18	37
1:71606754-71607331|68.71|MACS_peak_707	27	26	12	57	12	109	4	12	9	13	13	37
1:71682094-71682846|265.06|MACS_peak_708	37	21	33	166	62	240	24	50	13	23	40	28
1:71683435-71684410|189.31|MACS_peak_709	44	113	40	211	65	350	35	83	35	46	118	56
1:71683657-71684286|58.49|MACS_peak_47	33	101	30	179	58	308	33	67	24	36	102	46
1:71837121-71838549|107.99|MACS_peak_710	86	361	107	306	97	560	136	226	58	127	181	102
1:71947412-71948063|143.93|MACS_peak_711	15	27	10	116	13	164	39	16	18	26	29	25
1:71970539-71971199|101.65|MACS_peak_712	17	33	4	49	18	125	2	12	12	19	6	32
1:71990798-71991342|55.61|MACS_peak_713	13	1	19	37	20	74	4	19	13	9	4	26
1:72029551-72030238|150.56|MACS_peak_714	14	63	25	130	19	157	19	49	23	35	17	41
1:72035133-72035690|92.39|MACS_peak_715	9	31	11	42	8	97	5	12	4	13	21	18
1:72050889-72051460|56.74|MACS_peak_716	39	96	25	49	25	83	14	37	10	11	32	27
1:72073226-72073650|93.28|MACS_peak_102	22	18	11	36	16	18	36	69	11	35	28	32
1:72076008-72076672|119.92|MACS_peak_717	6	34	8	54	21	122	28	51	9	24	31	29
1:72084741-72085434|117.69|MACS_peak_718	10	13	8	37	13	145	3	30	24	29	28	20
1:72105150-72106081|245.44|MACS_peak_719	17	69	17	72	33	250	8	45	13	48	32	40
1:72113307-72115056|351.85|MACS_peak_720	40	203	51	339	53	493	31	76	40	67	69	65
1:72173466-72174037|80.19|MACS_peak_721	20	21	17	44	24	106	8	8	15	31	13	49
1:72316206-72316839|55.31|MACS_peak_95	44	72	16	46	14	77	18	26	21	35	17	37
1:72316343-72317283|88.52|MACS_peak_722	58	102	26	78	26	153	27	46	30	61	29	57
1:72372285-72373116|53.73|MACS_peak_723	136	266	135	255	168	305	161	327	59	147	229	128
1:72401050-72402401|107.69|MACS_peak_103	385	452	348	842	366	484	315	818	164	415	437	374
1:72406168-72407698|104.19|MACS_peak_724	80	444	118	638	96	818	118	209	84	147	232	118
1:72414168-72415894|95.84|MACS_peak_725	194	260	208	394	149	439	108	195	100	166	151	136
1:72420255-72420794|55.52|MACS_peak_726	15	27	25	43	40	61	7	31	15	12	24	39
1:72442403-72443260|277.95|MACS_peak_727	17	79	24	181	13	265	6	46	21	27	6	29
1:72442513-72443213|60.78|MACS_peak_48	12	71	22	161	13	249	6	38	18	24	6	24
1:72510523-72511576|245.05|MACS_peak_728	56	200	40	206	76	363	51	111	43	56	87	71
1:72523374-72523960|141.23|MACS_peak_729	11	60	10	62	16	113	6	16	10	12	2	19
1:72564408-72564996|114.27|MACS_peak_730	9	26	20	91	23	104	9	8	2	19	6	24
1:72573835-72574613|102.44|MACS_peak_731	40	183	34	207	45	295	70	113	37	49	101	54
1:72575549-72576494|100.55|MACS_peak_732	21	84	28	152	43	234	6	31	39	52	19	72
1:72577139-72579543|270.25|MACS_peak_733	282	695	314	1202	366	1411	189	545	200	400	429	339
1:72609843-72610396|51.41|MACS_peak_734	14	49	18	99	15	98	23	18	12	26	19	36
1:72635170-72636615|276.91|MACS_peak_735	129	459	134	549	151	733	116	191	72	155	131	146
1:72698481-72699087|81.56|MACS_peak_736	4	47	5	56	8	92	4	8	7	11	1	15
1:72736213-72736889|126.84|MACS_peak_737	19	26	38	117	15	128	12	22	22	42	13	48
1:72783754-72784472|86.53|MACS_peak_738	16	54	26	89	15	137	14	27	24	41	31	50
1:72803537-72803978|72.91|MACS_peak_104	30	31	11	27	32	22	62	109	19	19	47	46
1:72963058-72964279|117.32|MACS_peak_739	118	391	232	452	217	572	141	155	87	187	193	162
1:72963176-72964216|61.12|MACS_peak_96	116	384	228	436	212	563	136	145	84	187	192	160
1:72966349-72967061|79.52|MACS_peak_740	38	57	18	92	34	152	21	26	35	19	43	42
1:73053618-73054392|99.37|MACS_peak_105	175	149	215	127	156	130	199	225	104	221	200	162
1:73169412-73170316|63.91|MACS_peak_741	44	89	41	117	56	127	42	64	24	40	46	49
1:73198423-73200663|603.06|MACS_peak_742	120	383	143	416	163	938	118	211	103	176	161	157
1:73212340-73212886|71.90|MACS_peak_743	5	20	5	14	8	89	4	8	5	9	3	7
1:73221598-73222505|385.92|MACS_peak_744	25	38	37	80	36	262	11	29	14	31	12	35
1:73224034-73224998|543.86|MACS_peak_745	18	102	36	182	22	375	18	41	21	32	38	41
1:73238457-73239113|111.19|MACS_peak_746	26	77	29	63	16	121	17	36	15	14	23	28
1:73256369-73256818|60.98|MACS_peak_747	6	10	11	18	9	71	1	13	3	15	3	18
1:73259376-73260220|271.36|MACS_peak_748	49	77	31	85	54	194	33	41	23	50	36	29
1:73298738-73299429|77.23|MACS_peak_749	70	104	49	92	55	108	57	75	22	42	41	23
1:73302799-73303553|105.30|MACS_peak_750	16	114	38	77	47	166	14	37	14	36	34	52
1:73347126-73347692|125.44|MACS_peak_751	21	39	14	47	9	118	11	14	12	15	7	27
1:73348406-73349300|111.21|MACS_peak_752	18	137	32	102	29	204	19	39	30	35	37	37
1:73348482-73349300|61.87|MACS_peak_97	17	137	31	99	28	190	19	37	27	35	35	30
1:73365781-73366790|69.98|MACS_peak_753	24	68	42	112	27	168	2	23	33	31	16	55
1:73381188-73382491|78.15|MACS_peak_754	45	111	43	228	52	308	54	70	67	92	86	96
1:73433407-73434660|365.29|MACS_peak_755	50	94	39	150	59	287	22	72	14	26	27	64
1:73507147-73508088|308.35|MACS_peak_756	22	225	28	138	9	292	17	22	19	32	9	32
1:73507223-73508012|169.86|MACS_peak_98	22	217	25	134	9	280	17	20	16	30	8	29
1:73585337-73585625|52.59|MACS_peak_105	4	1	5	15	3	6	14	39	7	22	11	16
1:73630381-73630732|70.63|MACS_peak_106	20	24	21	34	12	18	29	70	34	24	32	32
1:73764432-73765394|97.14|MACS_peak_757	93	162	123	118	105	200	51	110	31	73	75	105
1:73905045-73906902|107.34|MACS_peak_758	61	209	86	312	64	348	55	75	70	72	71	140
1:73928939-73929919|119.18|MACS_peak_759	57	101	38	182	95	281	25	61	34	91	46	111
1:73954379-73955281|306.14|MACS_peak_760	41	243	47	190	47	327	34	58	33	58	30	78
1:73954405-73955162|121.43|MACS_peak_99	40	233	42	171	45	316	33	50	31	55	26	71
1:74025562-74026154|53.71|MACS_peak_761	30	52	19	99	29	109	20	37	29	42	35	26
1:74041581-74043617|265.35|MACS_peak_762	129	361	173	485	163	682	122	207	93	205	174	237
1:74042376-74043701|63.49|MACS_peak_100	79	242	76	304	90	537	71	107	52	114	103	148
1:74085819-74086677|65.50|MACS_peak_763	30	30	30	55	26	153	12	24	17	43	10	64
1:74103038-74105111|79.12|MACS_peak_764	184	650	202	829	194	1048	156	316	139	285	300	226
1:74112210-74113631|130.03|MACS_peak_765	80	111	98	263	96	240	28	116	63	86	82	107
1:74295517-74296115|70.61|MACS_peak_107	67	49	67	279	77	198	75	145	72	136	227	138
1:74303344-74304605|71.50|MACS_peak_766	207	411	234	650	331	470	101	240	140	334	235	229
1:74367826-74368865|74.18|MACS_peak_767	122	323	172	390	212	385	98	194	83	221	178	168
1:74375060-74375763|89.40|MACS_peak_768	13	36	29	100	11	135	8	29	26	32	17	51
1:74396992-74398659|101.50|MACS_peak_769	342	752	463	1018	476	947	256	549	191	538	460	298
1:74437958-74438622|119.92|MACS_peak_770	11	45	15	65	24	121	16	26	10	26	6	38
1:74661313-74662259|72.14|MACS_peak_106	800	1685	1295	2084	1472	1742	755	1330	504	1304	1366	828
1:74748442-74749291|98.09|MACS_peak_771	159	221	212	423	193	334	96	168	101	163	168	123
1:74772802-74773735|67.62|MACS_peak_772	119	243	141	505	137	351	81	192	76	172	184	117
1:74806060-74808859|126.33|MACS_peak_773	772	1471	943	2538	1022	1837	573	1231	380	1079	1086	830
1:74884390-74885974|64.05|MACS_peak_108	101	220	201	466	159	327	111	314	116	212	221	202
1:74947744-74952306|78.92|MACS_peak_774	765	1633	1014	2469	1127	1719	555	1212	416	1222	855	941
1:75262878-75265014|70.39|MACS_peak_775	514	1228	562	1449	665	1608	495	997	335	701	764	507
1:75277078-75278869|229.24|MACS_peak_776	303	661	346	701	367	756	183	423	126	416	284	260
1:75326525-75327017|56.85|MACS_peak_777	5	23	1	57	9	74	3	6	6	16	5	15
1:75337879-75340103|57.08|MACS_peak_778	262	500	303	873	362	792	294	594	159	485	412	381
1:75398392-75400694|159.22|MACS_peak_779	350	623	499	1397	464	1017	299	509	256	620	420	413
1:75408199-75409265|199.67|MACS_peak_780	35	190	29	156	34	243	17	25	15	44	19	55
1:75408344-75409212|141.60|MACS_peak_101	32	164	24	142	28	228	15	19	12	40	18	43
1:75438781-75439905|56.67|MACS_peak_781	59	202	84	359	70	352	58	136	60	127	102	142
1:75463576-75464307|54.28|MACS_peak_109	51	113	46	178	54	131	60	169	28	101	85	101
1:75464539-75465778|153.30|MACS_peak_782	62	139	70	284	87	277	37	88	57	102	40	104
1:75574449-75575372|65.48|MACS_peak_783	42	171	32	131	39	235	63	122	35	44	87	57
1:75579037-75580180|559.31|MACS_peak_784	40	193	44	289	72	427	21	56	36	49	25	63
1:75579088-75580153|75.88|MACS_peak_102	39	190	43	278	71	419	21	53	34	43	25	63
1:75587621-75588512|359.65|MACS_peak_785	21	189	15	175	20	320	7	25	24	33	18	34
1:75587651-75588434|139.01|MACS_peak_103	20	184	14	162	17	314	7	21	21	32	18	33
1:75601379-75602540|65.11|MACS_peak_786	97	148	55	274	81	260	45	145	42	70	93	97
1:75603254-75605407|91.03|MACS_peak_787	80	253	105	416	127	483	97	161	68	142	107	143
1:75607919-75608615|108.03|MACS_peak_788	21	34	14	87	15	133	16	29	16	32	31	31
1:75632051-75632657|72.92|MACS_peak_789	17	28	8	67	20	100	16	17	8	23	11	26
1:75652421-75653189|50.25|MACS_peak_49	85	187	62	266	66	226	62	113	30	96	133	67
1:75692902-75693708|50.90|MACS_peak_110	58	75	47	76	59	54	56	165	33	63	69	55
1:75797794-75798244|59.36|MACS_peak_111	32	35	24	41	36	37	31	92	38	39	43	41
1:75844218-75845516|92.87|MACS_peak_790	75	263	98	280	67	392	129	238	81	138	128	88
1:75890647-75891358|60.04|MACS_peak_112	133	129	36	135	64	202	156	267	41	65	121	73
1:75916130-75916925|61.90|MACS_peak_791	28	81	50	104	29	146	17	28	36	46	54	34
1:76042654-76043210|83.24|MACS_peak_792	6	69	4	74	6	120	11	11	16	16	11	8
1:76060703-76061499|60.58|MACS_peak_19	62	124	47	42	57	49	105	210	25	75	137	84
1:76060708-76061427|116.09|MACS_peak_113	57	114	47	39	53	48	98	205	25	73	133	81
1:76093165-76093751|72.56|MACS_peak_793	17	67	27	53	18	107	11	41	15	29	13	28
1:76107015-76108077|198.26|MACS_peak_794	13	45	11	78	47	191	11	57	13	24	15	33
1:76136771-76138306|220.42|MACS_peak_795	121	329	182	727	178	643	86	255	65	233	174	143
1:76202780-76203353|66.61|MACS_peak_796	22	40	10	61	18	103	17	23	11	9	11	11
1:76257298-76258858|509.56|MACS_peak_797	54	481	59	593	94	830	112	288	55	110	157	131
1:76257331-76258809|139.02|MACS_peak_50	54	479	59	582	94	828	112	286	55	106	157	129
1:76275983-76276525|66.60|MACS_peak_798	13	102	21	82	18	98	19	48	21	23	34	20
1:76372927-76373731|110.52|MACS_peak_114	26	90	37	81	51	105	67	198	25	82	98	66
1:76393960-76394415|64.17|MACS_peak_799	16	65	12	24	12	84	17	25	4	13	10	27
1:76403037-76403862|134.88|MACS_peak_800	37	48	29	80	44	146	28	92	22	30	33	33
1:76489631-76491707|230.63|MACS_peak_801	135	578	118	352	127	704	184	422	71	177	230	174
1:76529357-76529948|63.31|MACS_peak_802	14	43	8	50	12	84	3	12	12	6	5	22
1:76581927-76583071|771.92|MACS_peak_803	23	197	14	250	21	515	44	67	9	31	26	32
1:76582115-76582804|84.95|MACS_peak_51	13	173	7	214	20	425	40	58	9	27	24	29
1:76717361-76718393|161.70|MACS_peak_804	63	195	109	244	101	259	51	141	62	122	93	87
1:76849424-76850042|87.97|MACS_peak_805	25	74	17	50	11	117	9	33	10	4	23	27
1:77012172-77012968|66.61|MACS_peak_115	133	194	82	305	113	251	203	335	51	164	222	134
1:77030940-77031371|55.88|MACS_peak_806	11	56	12	43	4	73	8	21	6	24	4	9
1:77047231-77047519|58.90|MACS_peak_116	6	8	9	16	5	10	19	38	2	12	13	7
1:77132204-77133214|175.02|MACS_peak_807	63	129	44	154	30	299	79	165	33	64	98	41
1:77138529-77139809|129.63|MACS_peak_808	133	512	166	273	222	575	94	355	65	176	184	218
1:77174833-77175064|50.97|MACS_peak_117	4	6	7	20	3	14	14	40	6	17	13	18
1:77215384-77215982|50.63|MACS_peak_104	8	82	21	57	12	51	2	23	23	30	6	13
1:77275208-77275838|55.97|MACS_peak_809	30	152	38	155	42	153	40	86	22	64	79	47
1:77304682-77305678|119.26|MACS_peak_810	46	156	87	205	47	251	30	144	38	123	44	67
1:77309559-77311067|256.96|MACS_peak_811	79	335	81	365	51	453	58	174	42	154	59	113
1:77309725-77310895|53.60|MACS_peak_52	72	315	67	342	48	422	55	169	42	141	57	102
1:77312684-77313261|53.93|MACS_peak_812	17	37	8	58	17	87	4	17	7	29	7	26
1:77382723-77384040|86.55|MACS_peak_813	64	236	83	292	92	291	65	176	39	142	131	83
1:77386799-77388031|82.39|MACS_peak_814	53	101	60	235	67	230	38	143	42	80	100	81
1:77396172-77397150|142.04|MACS_peak_815	45	203	115	368	67	332	59	109	38	140	63	97
1:77434528-77435775|157.28|MACS_peak_816	105	300	75	382	91	494	80	223	69	139	110	146
1:77450058-77450696|75.20|MACS_peak_817	11	50	15	91	23	103	10	48	26	27	25	11
1:77456622-77458991|435.74|MACS_peak_818	79	370	123	561	131	683	94	241	62	207	146	150
1:77457224-77458787|62.86|MACS_peak_53	53	297	102	443	99	558	61	199	47	159	125	115
1:77483964-77485955|166.10|MACS_peak_819	163	513	282	784	204	939	169	407	133	364	244	283
1:77491534-77492167|76.16|MACS_peak_820	23	48	15	124	26	105	19	28	14	26	20	27
1:77493586-77494374|253.48|MACS_peak_821	23	116	36	220	35	231	21	54	34	52	29	47
1:77494837-77495631|50.20|MACS_peak_54	25	90	40	276	30	136	34	69	35	101	33	49
1:77494889-77495601|73.32|MACS_peak_822	25	90	40	271	30	136	34	68	35	99	33	46
1:77502349-77503310|304.42|MACS_peak_823	55	151	77	238	65	364	29	97	47	87	58	53
1:77503821-77504894|103.21|MACS_peak_824	52	87	45	156	51	192	29	71	32	81	48	52
1:77505845-77506636|58.06|MACS_peak_118	79	157	61	279	86	315	125	222	55	109	158	93
1:77521154-77522447|100.53|MACS_peak_825	101	288	79	300	114	372	60	157	58	133	102	113
1:77532139-77532646|59.75|MACS_peak_119	38	40	23	37	33	24	75	93	17	35	56	40
1:77532194-77532656|60.80|MACS_peak_20	38	38	23	35	32	23	70	87	16	31	55	40
1:77545529-77547085|82.34|MACS_peak_826	151	353	129	441	164	444	118	285	93	174	232	176
1:77567462-77568141|94.53|MACS_peak_827	14	32	21	90	33	95	11	15	11	15	18	42
1:77591829-77593014|97.07|MACS_peak_828	61	309	180	354	126	430	54	205	65	191	138	110
1:77622731-77623469|136.04|MACS_peak_829	7	104	10	132	5	175	8	21	5	18	28	19
1:77629923-77630318|77.66|MACS_peak_120	32	51	30	117	29	72	40	82	14	40	55	43
1:77640760-77642061|170.21|MACS_peak_830	148	370	140	311	149	405	45	137	55	115	116	110
1:77640931-77641836|68.35|MACS_peak_105	137	342	125	289	132	379	41	130	48	107	105	96
1:77748314-77749007|155.58|MACS_peak_831	5	40	42	125	30	137	19	21	19	61	15	44
1:77752742-77753867|322.39|MACS_peak_832	31	210	27	240	23	418	69	87	35	23	69	44
1:77791660-77792445|98.84|MACS_peak_833	55	153	43	145	28	149	33	81	25	56	39	34
1:77798523-77799240|131.39|MACS_peak_834	4	124	12	131	14	177	24	51	0	24	13	22
1:77806565-77807258|132.53|MACS_peak_835	5	66	17	60	23	141	9	17	32	28	10	25
1:77839721-77840860|175.41|MACS_peak_836	106	310	88	168	85	282	75	132	75	119	90	54
1:77895986-77896778|68.05|MACS_peak_837	43	115	31	113	29	169	64	83	33	42	55	59
1:77904858-77905378|72.86|MACS_peak_838	9	34	8	58	5	93	0	12	9	19	2	15
1:77927628-77928192|74.01|MACS_peak_839	38	83	19	51	27	83	30	80	12	23	7	26
1:78021578-78022498|199.88|MACS_peak_840	64	114	47	180	65	303	49	89	28	57	56	51
1:78128958-78129930|50.35|MACS_peak_841	25	143	52	364	48	331	103	184	82	147	156	81
1:78129141-78129779|64.42|MACS_peak_121	16	126	48	317	41	279	101	162	79	134	144	66
1:78141593-78142155|76.56|MACS_peak_122	40	39	21	114	20	71	46	111	32	55	81	44
1:78187351-78188221|144.18|MACS_peak_123	51	66	75	223	43	56	169	280	36	110	149	96
1:78187426-78188176|60.60|MACS_peak_21	47	61	68	200	37	55	160	260	31	105	137	81
1:78196426-78197468|50.52|MACS_peak_124	136	148	129	274	123	182	163	252	82	191	210	146
1:78425125-78426848|415.84|MACS_peak_842	60	212	68	317	86	434	43	105	56	84	86	58
1:78451399-78452008|76.59|MACS_peak_843	14	26	5	66	7	115	6	15	6	8	6	32
1:78781527-78782480|252.80|MACS_peak_844	64	333	34	241	68	497	113	99	46	42	124	48
1:78781605-78782451|99.60|MACS_peak_106	63	327	33	239	66	495	111	97	45	42	121	46
1:78789629-78790305|152.81|MACS_peak_845	27	143	20	113	22	177	42	19	14	24	20	17
1:78789685-78790271|114.55|MACS_peak_107	26	133	20	107	20	164	42	19	14	22	20	16
1:78811714-78812603|133.42|MACS_peak_846	21	24	39	193	47	185	11	36	26	27	31	65
1:78880786-78882009|312.44|MACS_peak_847	27	76	19	187	27	303	43	44	24	21	31	60
1:78909924-78910679|84.63|MACS_peak_108	59	173	68	96	38	106	26	50	39	75	49	38
1:78909964-78910611|50.17|MACS_peak_848	57	172	66	96	37	103	25	50	37	75	47	37
1:79007198-79007733|53.23|MACS_peak_849	21	23	10	33	19	65	18	14	0	6	3	14
1:79017166-79017854|100.04|MACS_peak_850	4	61	16	105	4	133	3	15	7	21	9	17
1:79055367-79056177|162.87|MACS_peak_851	24	19	9	94	17	157	19	15	24	28	7	29
1:79379500-79380564|122.85|MACS_peak_852	126	305	109	324	155	526	176	224	86	142	208	116
1:79390652-79391884|161.40|MACS_peak_109	27	271	21	162	10	234	27	37	12	59	27	39
1:79390698-79391745|172.47|MACS_peak_853	22	241	16	146	8	214	24	34	9	51	23	35
1:79439621-79440660|56.54|MACS_peak_854	305	666	334	676	310	724	295	473	237	315	558	245
1:79450177-79451082|59.76|MACS_peak_107	735	856	519	748	758	868	665	983	313	461	917	518
1:79452206-79452957|51.55|MACS_peak_855	34	88	39	139	40	197	39	87	25	28	83	45
1:79466394-79467408|165.20|MACS_peak_856	61	147	44	286	30	329	34	92	40	70	60	73
1:79466504-79467332|76.33|MACS_peak_55	56	136	36	260	24	303	31	83	36	67	57	67
1:79589376-79590235|156.72|MACS_peak_857	25	58	16	90	40	173	49	66	9	31	31	42
1:79598316-79599303|71.70|MACS_peak_858	58	75	42	144	73	170	58	65	69	65	91	61
1:79602435-79603076|78.85|MACS_peak_859	9	58	14	85	8	114	9	3	12	10	13	13
1:79671381-79672475|50.51|MACS_peak_108	380	747	403	819	464	684	443	555	280	425	746	276
1:79733332-79734089|161.76|MACS_peak_860	10	71	18	89	19	151	16	34	21	23	14	27
1:79775804-79776657|142.84|MACS_peak_109	1143	1924	1404	2134	1562	1943	1445	1814	901	1474	2119	969
1:79840485-79841270|56.87|MACS_peak_861	53	78	20	83	13	130	60	67	16	29	61	25
1:79874586-79875378|99.92|MACS_peak_862	34	41	29	90	52	110	15	25	23	32	17	50
1:79906090-79906562|61.40|MACS_peak_863	26	49	17	44	15	77	19	25	16	32	17	26
1:79913877-79914549|50.17|MACS_peak_864	36	101	24	77	16	129	38	53	19	22	46	34
1:80030120-80030558|157.80|MACS_peak_125	24	18	12	21	9	16	69	90	19	24	57	42
1:80030228-80030666|108.59|MACS_peak_22	29	18	16	21	10	18	75	82	22	25	58	46
1:80339521-80341442|198.02|MACS_peak_110	2317	4007	3463	4664	3881	3820	3274	3925	1814	3407	4330	2112
1:80404580-80405124|68.08|MACS_peak_865	10	74	15	55	9	104	18	35	20	13	9	20
1:80408400-80410537|126.67|MACS_peak_866	268	596	130	503	189	895	190	362	186	181	338	276
1:80466525-80467520|101.03|MACS_peak_867	33	74	45	110	60	218	47	50	9	31	84	48
1:80574985-80575554|86.96|MACS_peak_868	36	113	22	62	31	116	17	67	28	39	25	39
1:80661909-80662581|56.76|MACS_peak_869	55	96	23	117	24	146	53	41	27	20	71	26
1:80715351-80715991|81.82|MACS_peak_870	22	41	10	59	29	99	23	13	9	8	23	32
1:80801525-80802146|112.23|MACS_peak_871	39	120	26	93	20	121	21	58	24	21	30	24
1:80822792-80823548|128.88|MACS_peak_872	36	37	10	91	23	153	39	83	28	35	38	31
1:80831025-80831687|115.50|MACS_peak_873	12	81	7	90	9	153	15	16	12	17	12	16
1:80831755-80832373|58.21|MACS_peak_110	13	115	11	46	0	94	16	21	8	11	4	18
1:80840285-80840927|103.97|MACS_peak_111	21	131	25	106	20	153	8	18	14	32	11	26
1:80840291-80841015|205.08|MACS_peak_874	21	133	25	108	28	156	9	18	16	33	11	29
1:80940860-80941492|72.16|MACS_peak_875	6	24	6	78	4	112	6	6	4	12	8	11
1:80950298-80950926|85.85|MACS_peak_876	17	69	16	67	6	144	8	28	2	8	19	18
1:80977344-80978118|149.95|MACS_peak_877	30	66	14	77	29	152	25	40	14	14	35	29
1:80990364-80991174|368.07|MACS_peak_878	17	89	31	101	14	288	31	18	17	16	18	38
1:81033427-81033951|51.19|MACS_peak_879	12	61	8	36	0	80	9	4	7	7	9	11
1:81042983-81043908|82.86|MACS_peak_880	41	125	9	112	19	171	45	30	20	27	56	40
1:81043170-81043916|87.25|MACS_peak_112	38	115	8	96	16	154	39	25	20	21	51	29
1:81091791-81092580|86.86|MACS_peak_881	35	92	11	128	9	210	40	44	38	49	72	41
1:81093384-81094166|175.93|MACS_peak_882	2	94	12	172	14	199	9	24	7	9	15	29
1:81097027-81097628|82.61|MACS_peak_883	5	52	21	65	4	111	8	10	7	21	6	17
1:81098357-81099111|150.44|MACS_peak_884	98	212	41	200	36	275	61	100	20	52	42	70
1:81099420-81100309|228.48|MACS_peak_885	26	213	43	193	36	276	32	55	33	29	47	44
1:81099442-81100309|90.31|MACS_peak_113	26	212	42	192	34	273	32	54	33	29	47	44
1:81101774-81102808|282.07|MACS_peak_886	26	133	20	181	22	263	60	44	16	11	29	31
1:81102194-81102759|50.25|MACS_peak_56	11	110	9	128	12	200	44	36	12	6	19	20
1:81109086-81109743|93.14|MACS_peak_887	7	51	6	91	3	140	13	33	7	9	9	7
1:81113132-81113760|99.58|MACS_peak_888	15	36	13	63	11	129	4	10	6	16	5	20
1:81125888-81126660|71.41|MACS_peak_889	17	69	28	126	13	130	12	26	14	40	6	24
1:81131837-81133264|215.49|MACS_peak_890	53	362	26	315	50	515	137	143	41	47	107	60
1:81132022-81132713|61.87|MACS_peak_57	23	259	16	211	31	385	102	115	24	32	87	29
1:81163951-81164629|73.34|MACS_peak_891	26	103	22	81	13	162	26	41	26	39	34	22
1:81168122-81168833|99.59|MACS_peak_892	33	113	14	143	19	135	20	64	25	32	13	10
1:81169084-81169878|79.30|MACS_peak_893	23	202	22	250	29	328	112	179	53	82	142	48
1:81188530-81189859|87.20|MACS_peak_114	32	509	30	379	31	553	56	122	33	56	41	51
1:81188585-81189967|510.79|MACS_peak_894	32	510	33	383	31	550	56	123	33	57	41	53
1:81188946-81189908|212.91|MACS_peak_58	31	436	25	355	23	469	55	102	28	49	37	43
1:81234728-81235458|174.94|MACS_peak_895	30	57	13	51	33	146	18	26	6	23	20	27
1:81254231-81254826|73.75|MACS_peak_896	27	49	12	79	19	113	15	30	28	27	17	42
1:81285502-81286771|365.52|MACS_peak_897	52	163	50	238	39	355	18	67	39	61	46	44
1:81285642-81286297|54.70|MACS_peak_115	25	128	35	160	25	263	11	45	21	45	27	12
1:81287771-81288668|315.80|MACS_peak_898	9	142	41	226	28	310	29	51	20	50	19	36
1:81287856-81288559|52.73|MACS_peak_59	8	135	40	208	27	283	27	45	19	42	14	28
1:81300482-81301116|71.06|MACS_peak_899	86	145	47	157	47	183	62	64	54	62	85	44
1:81307358-81307880|54.29|MACS_peak_116	37	78	25	79	21	87	27	22	37	28	43	42
1:81338631-81339720|287.13|MACS_peak_900	17	88	5	90	18	269	14	27	24	10	20	27
1:81438631-81439161|52.86|MACS_peak_901	31	65	3	66	6	101	20	55	9	17	26	14
1:81522839-81523483|57.45|MACS_peak_902	21	90	26	64	13	99	38	39	23	27	47	23
1:81835984-81836533|84.80|MACS_peak_903	1	30	5	36	8	97	5	8	10	17	2	7
1:81850498-81851389|193.41|MACS_peak_904	54	167	24	86	26	202	33	91	13	15	44	25
1:81949909-81950672|100.84|MACS_peak_905	31	32	13	62	21	161	12	10	14	26	21	46
1:82106573-82107427|86.75|MACS_peak_906	101	231	49	119	76	304	74	168	52	85	116	79
1:82129417-82130435|56.83|MACS_peak_907	75	153	57	135	73	174	54	106	57	64	73	76
1:82195454-82196051|62.24|MACS_peak_908	18	62	27	62	8	104	6	21	23	45	12	17
1:82254149-82254630|63.23|MACS_peak_909	10	48	10	50	13	72	10	10	4	2	10	13
1:82289584-82293504|450.17|MACS_peak_111	4888	7232	6029	8403	6584	7488	4423	7801	3210	6268	7459	4110
1:82304129-82305309|331.40|MACS_peak_910	47	258	91	358	60	611	73	223	93	119	106	95
1:82308179-82308763|72.95|MACS_peak_911	8	47	14	86	3	110	7	21	20	9	12	12
1:82316053-82317184|56.15|MACS_peak_112	1122	2137	1367	1922	1582	1827	1193	1527	801	1318	1922	927
1:82323937-82324899|177.19|MACS_peak_912	43	185	57	157	44	226	37	77	40	66	53	77
1:82329358-82330271|50.31|MACS_peak_913	63	121	49	198	28	214	77	155	38	66	100	58
1:82374746-82375579|167.93|MACS_peak_914	32	164	35	218	46	299	25	40	35	55	57	77
1:82374760-82375510|68.68|MACS_peak_117	29	151	32	207	42	274	23	35	31	49	53	65
1:82377186-82377916|109.12|MACS_peak_915	23	32	15	63	25	124	4	30	14	17	17	27
1:82386656-82387956|127.35|MACS_peak_916	80	229	70	258	64	321	100	176	65	92	108	97
1:82388599-82389091|74.36|MACS_peak_917	25	84	17	106	9	147	19	34	5	16	24	19
1:82389230-82389829|85.98|MACS_peak_918	24	66	20	109	36	117	26	39	11	32	29	36
1:82410449-82411270|51.88|MACS_peak_919	44	80	26	95	38	159	26	62	20	32	45	57
1:82411010-82412078|54.51|MACS_peak_118	85	138	56	143	48	158	61	64	39	67	94	85
1:82451697-82452514|71.54|MACS_peak_920	70	181	19	183	30	261	196	178	49	42	146	53
1:82453177-82454105|130.04|MACS_peak_921	27	133	62	215	47	230	59	88	77	99	68	47
1:82465046-82466001|242.89|MACS_peak_922	39	117	21	159	57	330	54	81	29	40	52	59
1:82536522-82537225|62.59|MACS_peak_126	59	92	49	146	50	197	85	150	41	51	82	64
1:82536537-82537366|69.01|MACS_peak_923	64	93	48	157	55	207	87	157	41	57	85	70
1:82537729-82538375|103.39|MACS_peak_924	20	67	27	75	27	112	14	26	16	15	26	33
1:82697300-82697903|95.92|MACS_peak_925	13	36	16	43	25	103	13	20	10	14	21	29
1:82724716-82725619|85.86|MACS_peak_113	540	1102	641	1147	727	1135	641	836	478	604	989	475
1:82746518-82746747|95.76|MACS_peak_127	9	7	7	54	7	25	18	53	16	7	18	13
1:82814033-82814687|84.43|MACS_peak_926	26	30	12	76	5	127	7	19	15	23	16	29
1:82815670-82816482|101.09|MACS_peak_128	60	93	28	137	58	241	110	207	72	95	150	84
1:82817018-82817619|52.76|MACS_peak_927	32	54	21	76	14	96	14	55	17	34	24	22
1:82831670-82832420|231.61|MACS_peak_928	27	29	22	88	56	145	12	16	16	28	14	42
1:82867689-82868300|98.79|MACS_peak_929	21	64	10	89	12	114	22	48	17	25	25	22
1:82905302-82907088|469.77|MACS_peak_930	72	276	88	505	87	697	91	109	60	73	90	95
1:82905806-82907131|51.02|MACS_peak_60	51	233	66	420	75	578	75	81	55	59	74	84
1:82905820-82906598|82.44|MACS_peak_119	36	188	45	297	46	471	50	56	41	36	67	59
1:82918127-82919347|86.61|MACS_peak_931	25	131	19	179	42	261	68	78	26	27	75	63
1:83058249-83058857|62.65|MACS_peak_932	22	46	7	66	19	90	3	20	22	14	14	34
1:83101854-83102509|68.50|MACS_peak_120	26	111	7	41	6	99	25	28	2	12	28	12
1:83159462-83160120|62.25|MACS_peak_114	385	524	260	500	346	483	508	480	302	308	610	225
1:83316779-83317474|99.42|MACS_peak_933	54	87	42	246	50	204	67	76	39	66	53	61
1:83342867-83343508|192.08|MACS_peak_934	16	83	8	82	12	164	18	9	22	14	7	11
1:83342930-83343495|50.09|MACS_peak_121	15	83	8	79	12	162	17	7	16	13	7	10
1:83432179-83432765|76.88|MACS_peak_935	23	22	14	57	16	106	15	27	14	17	21	27
1:83450217-83451178|99.59|MACS_peak_936	144	254	49	113	62	261	120	241	46	72	79	75
1:83455043-83455668|119.84|MACS_peak_937	12	52	16	88	10	131	19	16	10	23	14	20
1:83553097-83553969|68.54|MACS_peak_129	54	191	51	239	57	342	130	258	39	62	150	100
1:83736164-83737244|53.71|MACS_peak_938	88	174	86	252	90	287	81	136	66	87	121	94
1:83755243-83755810|56.50|MACS_peak_130	21	50	8	55	4	80	29	101	16	9	13	20
1:83781442-83781943|55.20|MACS_peak_939	16	62	16	51	25	76	4	8	4	7	9	14
1:83861853-83862500|105.94|MACS_peak_131	21	64	29	79	33	118	34	145	19	61	60	40
1:83862002-83863369|83.42|MACS_peak_940	69	147	74	204	59	303	67	207	54	138	90	84
1:83876039-83876647|62.13|MACS_peak_941	14	65	15	28	13	98	8	26	5	16	11	27
1:83878498-83879700|156.28|MACS_peak_942	87	324	141	489	187	720	100	301	105	214	211	163
1:83887003-83887745|101.97|MACS_peak_943	11	21	4	45	12	140	4	8	8	18	3	30
1:83959491-83960364|302.84|MACS_peak_944	11	91	23	106	36	248	8	13	7	15	6	37
1:83966439-83967504|411.55|MACS_peak_945	15	67	32	120	29	306	12	23	27	24	9	48
1:83969663-83970216|54.07|MACS_peak_946	21	46	16	50	11	84	1	13	12	29	14	27
1:83970589-83971413|112.68|MACS_peak_947	47	191	84	182	79	182	5	51	38	92	42	68
1:83970602-83971387|98.07|MACS_peak_122	45	191	84	180	79	179	4	51	38	91	42	68
1:84052657-84053307|105.13|MACS_peak_948	32	59	28	70	14	123	21	59	22	54	25	34
1:84067293-84067637|61.53|MACS_peak_132	12	31	13	50	18	52	32	57	12	23	20	36
1:84093086-84093830|51.42|MACS_peak_133	93	125	68	173	74	94	87	190	30	92	103	85
1:84106725-84107395|78.43|MACS_peak_949	38	64	36	55	37	111	11	32	30	30	36	39
1:84171240-84172256|192.02|MACS_peak_950	93	333	45	177	88	286	39	139	16	63	77	67
1:84211326-84212459|212.56|MACS_peak_951	102	170	66	169	57	333	96	169	68	94	80	63
1:84244336-84244843|104.99|MACS_peak_952	14	63	4	40	14	104	10	40	11	9	16	13
1:84440669-84441111|86.30|MACS_peak_23	19	9	6	18	3	19	59	70	31	25	50	48
1:84440740-84441058|131.69|MACS_peak_134	16	7	5	15	3	17	59	66	29	24	49	41
1:84444060-84444701|87.57|MACS_peak_953	23	31	18	91	13	122	18	18	17	38	17	29
1:84488690-84489530|68.43|MACS_peak_123	57	186	35	88	45	136	27	60	23	35	42	47
1:84488746-84489467|66.26|MACS_peak_954	54	180	35	85	38	129	26	57	20	35	41	44
1:84506468-84507865|121.11|MACS_peak_955	99	162	73	189	79	364	61	86	77	72	105	125
1:84553912-84554618|104.70|MACS_peak_124	14	147	8	46	5	107	5	15	11	15	2	18
1:84554082-84554643|86.75|MACS_peak_956	12	129	8	44	5	102	5	12	9	15	2	17
1:84585285-84586351|53.31|MACS_peak_135	88	271	101	225	146	224	203	318	85	145	175	140
1:84611738-84612457|132.20|MACS_peak_957	46	170	28	137	29	232	58	70	27	45	52	37
1:84614535-84615215|100.80|MACS_peak_958	28	37	25	68	33	144	6	38	15	34	41	25
1:84638465-84638923|63.55|MACS_peak_959	22	37	13	47	23	85	10	29	11	19	12	23
1:84639126-84639967|226.34|MACS_peak_960	39	63	28	119	49	216	18	59	55	69	45	44
1:84661429-84662363|64.58|MACS_peak_961	127	279	66	99	66	238	118	187	28	79	111	83
1:84729716-84730442|58.58|MACS_peak_125	25	108	12	49	5	49	8	24	7	9	10	14
1:84862813-84863365|62.25|MACS_peak_962	18	51	19	93	10	91	2	13	10	16	13	36
1:84889295-84890586|146.19|MACS_peak_136	137	214	169	304	161	275	263	566	213	221	372	252
1:84890025-84890532|55.52|MACS_peak_115	94	120	83	154	93	137	176	372	122	143	249	126
1:84951458-84952197|161.52|MACS_peak_963	18	69	10	52	9	162	16	9	9	12	13	28
1:85703167-85704155|77.95|MACS_peak_116	672	956	667	996	819	1089	688	906	452	567	998	438
1:85742494-85743402|66.56|MACS_peak_137	135	127	76	234	95	87	112	249	48	103	124	109
1:85792977-85794784|69.03|MACS_peak_117	1481	2863	2183	3320	2293	2886	1319	2371	999	2258	2445	1346
1:85897247-85899963|62.88|MACS_peak_964	257	446	249	768	273	805	194	436	205	347	348	239
1:85901635-85902705|69.78|MACS_peak_965	59	214	65	242	53	305	65	123	60	109	127	82
1:85916730-85917772|83.98|MACS_peak_966	150	366	205	421	218	343	111	237	143	183	211	106
1:85922794-85923624|141.11|MACS_peak_967	35	33	29	96	45	209	7	16	13	30	24	56
1:85977543-85978426|53.57|MACS_peak_24	83	75	67	108	61	54	65	166	35	52	124	103
1:86102920-86103428|58.02|MACS_peak_968	15	11	12	84	13	93	2	33	15	31	14	23
1:86112587-86113230|91.38|MACS_peak_969	22	105	17	111	14	130	22	27	17	25	17	32
1:86112620-86113184|99.97|MACS_peak_126	22	104	17	108	14	130	22	27	17	24	17	31
1:86210680-86211598|127.64|MACS_peak_970	11	136	15	78	7	196	26	27	22	19	27	47
1:86211017-86211607|51.92|MACS_peak_127	7	112	7	48	6	148	15	22	18	10	19	24
1:86232434-86233641|143.41|MACS_peak_971	62	94	38	104	65	232	38	72	26	56	44	74
1:86569274-86569816|86.39|MACS_peak_972	6	31	6	54	10	92	6	13	8	15	3	17
1:86582023-86583103|89.05|MACS_peak_118	1322	2300	1862	2622	1979	2250	1222	2095	811	1756	2150	1239
1:86598380-86599112|54.38|MACS_peak_973	62	128	72	186	88	142	58	84	40	56	69	55
1:86632503-86633598|142.16|MACS_peak_974	64	184	43	258	84	303	44	110	61	56	79	66
1:86645624-86646745|144.59|MACS_peak_975	43	120	25	209	36	208	28	58	18	35	35	64
1:86703236-86704453|69.70|MACS_peak_119	1049	1960	1336	2023	1560	1725	862	1528	781	1468	1685	911
1:87044839-87045943|214.77|MACS_peak_976	48	207	70	237	31	431	26	56	38	68	28	74
1:87044960-87045809|74.32|MACS_peak_128	36	197	63	211	25	408	25	45	30	56	20	60
1:87049427-87051330|72.97|MACS_peak_977	210	283	140	590	206	846	172	388	116	207	296	199
1:87168601-87175031|128.47|MACS_peak_978	850	2127	1005	3050	983	3418	727	1539	587	1156	1156	982
1:87326473-87328117|53.81|MACS_peak_120	1481	2738	1968	3064	2281	2594	1062	2269	815	2104	2212	1346
1:87545558-87546517|207.36|MACS_peak_979	100	167	82	177	59	243	32	86	32	67	55	45
1:87573967-87575809|109.32|MACS_peak_980	171	421	182	590	220	803	158	297	144	193	241	188
1:87580659-87581345|71.75|MACS_peak_981	29	50	40	83	29	113	14	39	20	46	27	44
1:87648597-87649387|189.87|MACS_peak_982	26	47	57	112	54	158	6	27	34	50	9	29
1:87670933-87672191|79.22|MACS_peak_983	116	166	66	138	96	303	73	159	37	94	99	94
1:87686118-87687022|230.03|MACS_peak_984	57	219	142	371	148	492	59	103	61	110	124	111
1:87840624-87841218|74.22|MACS_peak_985	24	59	39	89	45	114	16	18	15	30	10	41
1:87929513-87930212|79.86|MACS_peak_986	25	182	31	64	15	127	12	17	13	39	32	34
1:87929543-87930374|194.09|MACS_peak_129	25	201	31	73	17	136	12	19	12	45	32	41
1:88007802-88008783|84.50|MACS_peak_121	565	969	580	1010	840	953	529	840	390	643	898	494
1:88295381-88296793|110.00|MACS_peak_987	130	133	146	512	80	364	55	101	139	189	83	165
1:88345434-88346126|164.38|MACS_peak_988	18	40	22	103	31	150	31	47	25	15	26	28
1:88357279-88358059|58.03|MACS_peak_122	243	438	304	434	320	348	230	323	130	268	339	254
1:88429166-88430091|63.42|MACS_peak_989	51	75	58	149	75	168	35	71	36	72	82	54
1:88470517-88471134|70.21|MACS_peak_990	18	48	53	78	32	98	28	55	22	52	27	37
1:88474531-88475211|135.95|MACS_peak_991	25	23	15	59	22	124	7	14	20	42	12	29
1:88491423-88492289|75.53|MACS_peak_992	40	63	76	157	61	98	16	48	22	63	32	58
1:88553455-88554166|62.34|MACS_peak_993	59	63	38	107	47	163	27	75	38	35	53	49
1:88568279-88569439|55.82|MACS_peak_994	65	151	73	278	55	267	45	110	56	101	78	110
1:88639601-88640455|105.06|MACS_peak_995	68	61	54	105	57	125	40	65	27	84	29	61
1:88668283-88669225|75.91|MACS_peak_996	56	119	77	190	84	212	58	94	41	132	80	72
1:88800338-88800613|55.07|MACS_peak_138	4	9	8	24	18	21	16	58	5	20	15	23
1:88809801-88810712|101.88|MACS_peak_997	40	118	60	176	58	266	36	113	27	86	85	63
1:88839928-88841621|155.21|MACS_peak_998	107	249	102	246	149	325	64	197	45	112	113	126
1:88849921-88850817|79.60|MACS_peak_999	31	63	40	250	17	281	97	156	33	67	102	63
1:88850068-88850627|56.84|MACS_peak_139	22	52	21	210	14	241	81	132	22	45	86	47
1:88866922-88867567|92.94|MACS_peak_1000	20	53	28	73	30	107	6	24	13	30	19	38
1:88878609-88879481|161.54|MACS_peak_1001	63	217	112	301	102	236	32	100	47	131	62	74
1:88907780-88909454|185.63|MACS_peak_1002	78	180	109	289	126	366	34	121	60	119	98	131
1:88936918-88937550|63.78|MACS_peak_1003	22	53	20	66	16	99	10	56	26	26	21	38
1:88942785-88943530|79.06|MACS_peak_140	155	221	173	345	209	288	207	396	102	232	360	253
1:88959673-88960177|50.27|MACS_peak_1004	6	39	16	44	18	82	6	21	11	18	4	30
1:88984802-88985244|79.59|MACS_peak_141	12	18	7	20	17	13	34	80	23	19	25	39
1:88997744-88998465|127.72|MACS_peak_1005	48	135	37	147	56	226	80	112	29	39	63	37
1:88998748-88999258|54.91|MACS_peak_1006	11	9	1	40	21	70	5	16	4	11	9	31
1:89049414-89050242|327.01|MACS_peak_1007	20	187	13	138	28	283	22	31	17	28	17	28
1:89049534-89050285|158.23|MACS_peak_130	17	186	11	138	30	266	21	32	12	26	18	27
1:89082018-89083558|145.94|MACS_peak_1008	86	180	98	383	133	399	49	116	60	128	99	133
1:89091837-89093110|59.46|MACS_peak_1009	80	194	91	270	88	256	54	142	44	116	84	109
1:89093957-89095082|57.05|MACS_peak_1010	86	118	80	245	77	192	50	129	32	107	83	92
1:89102485-89103433|67.15|MACS_peak_1011	57	95	67	269	84	180	35	106	29	103	68	82
1:89126672-89127320|75.73|MACS_peak_131	15	112	12	58	21	128	20	33	17	14	27	23
1:89126715-89127416|125.25|MACS_peak_1012	15	116	12	65	23	131	20	32	16	14	28	24
1:89132813-89133718|91.24|MACS_peak_1013	52	106	35	150	51	183	25	52	36	41	27	83
1:89164577-89165477|235.61|MACS_peak_1014	54	210	29	214	49	248	41	105	25	55	50	46
1:89173765-89175138|487.70|MACS_peak_1015	31	84	63	413	90	565	40	85	33	70	37	88
1:89173945-89174990|60.99|MACS_peak_61	26	70	57	376	81	521	33	73	27	66	33	82
1:89187951-89188721|145.39|MACS_peak_1016	35	44	26	142	23	169	26	27	22	41	16	30
1:89234903-89235932|136.03|MACS_peak_1017	110	126	108	226	131	311	71	154	54	117	121	101
1:89239512-89240141|64.34|MACS_peak_1018	54	88	51	165	55	109	18	119	32	51	41	47
1:89271624-89273472|270.32|MACS_peak_1019	82	256	93	265	123	359	60	118	55	139	86	123
1:89310373-89311055|80.62|MACS_peak_1020	24	66	31	110	31	101	7	49	20	46	35	20
1:89364378-89365077|53.08|MACS_peak_25	82	106	71	172	95	73	59	166	37	101	115	118
1:89400509-89401454|99.49|MACS_peak_1021	63	120	95	274	89	222	46	72	44	120	62	79
1:89416713-89417326|89.85|MACS_peak_1022	11	35	21	93	10	123	4	16	15	30	15	31
1:89426162-89426727|59.89|MACS_peak_1023	27	15	18	55	12	92	10	13	9	21	2	31
1:89443429-89444547|57.19|MACS_peak_1024	99	163	107	208	146	302	118	242	48	160	129	135
1:89467317-89468356|54.84|MACS_peak_1025	92	97	97	257	104	184	66	134	45	137	77	128
1:89489018-89490107|119.72|MACS_peak_1026	87	152	68	178	65	227	67	118	26	96	78	90
1:89495627-89496795|53.08|MACS_peak_132	85	178	96	256	81	338	39	81	51	93	73	109
1:89495648-89496780|114.08|MACS_peak_1027	81	176	95	254	78	334	38	80	49	92	72	107
1:89537914-89539266|199.39|MACS_peak_1028	108	232	177	524	222	690	88	254	94	214	162	181
1:89542358-89542988|124.50|MACS_peak_142	52	69	43	133	54	174	108	208	24	95	207	94
1:89555243-89556408|87.12|MACS_peak_1029	64	102	75	211	78	208	47	94	62	111	61	88
1:89576585-89577528|56.03|MACS_peak_123	781	911	684	900	950	808	587	1102	369	820	937	714
1:89579839-89582376|92.69|MACS_peak_124	3762	4481	4541	5465	5787	4438	2463	5431	1775	5488	5004	3382
1:89670662-89672516|64.78|MACS_peak_143	355	468	384	1044	428	665	274	842	177	544	558	552
1:89674474-89675574|77.39|MACS_peak_144	114	178	82	314	105	305	139	297	101	111	269	125
1:89701435-89704518|170.52|MACS_peak_1030	504	687	508	1169	607	1115	287	786	229	624	477	581
1:89706627-89707393|53.69|MACS_peak_1031	51	69	56	162	84	209	33	102	50	82	74	77
1:89712512-89715348|133.75|MACS_peak_1032	297	453	295	881	405	842	212	440	180	429	281	363
1:89718106-89719241|57.01|MACS_peak_145	299	420	266	518	284	858	295	610	192	437	415	293
1:89755304-89755970|94.54|MACS_peak_146	97	174	133	250	131	236	146	347	62	180	240	145
1:89756183-89756880|65.66|MACS_peak_1033	51	54	23	179	45	147	14	91	19	47	38	65
1:89760851-89761581|66.60|MACS_peak_1034	21	37	28	65	16	124	10	19	7	22	16	29
1:89823331-89825374|64.14|MACS_peak_1035	223	297	214	665	226	410	120	370	125	315	179	227
1:89865230-89866641|104.51|MACS_peak_1036	117	218	104	343	133	348	99	229	57	130	125	118
1:89869082-89871437|101.05|MACS_peak_1037	216	243	179	530	199	479	114	289	83	205	179	266
1:89877690-89880745|151.49|MACS_peak_1038	185	423	240	819	321	782	87	302	129	274	186	371
1:89883301-89884543|79.70|MACS_peak_1039	106	188	104	369	118	451	45	160	59	133	128	171
1:89921471-89928012|97.76|MACS_peak_1040	1286	1975	1277	3763	1543	2850	664	1846	550	1573	1247	1467
1:89988811-89989409|74.49|MACS_peak_1041	12	51	30	80	26	113	10	26	27	27	21	34
1:90026379-90027409|66.31|MACS_peak_1042	69	101	85	164	108	148	62	87	60	94	67	82
1:90063138-90064174|120.12|MACS_peak_1043	41	112	29	220	48	236	19	45	46	56	51	76
1:90071564-90072560|144.24|MACS_peak_147	74	180	67	211	89	186	148	321	66	78	145	117
1:90074739-90075300|83.10|MACS_peak_1044	22	76	7	66	24	112	17	39	22	28	39	21
1:90097409-90098052|55.38|MACS_peak_1045	26	51	23	101	27	90	1	44	21	42	28	42
1:90099369-90100296|154.14|MACS_peak_1046	27	94	63	174	51	198	9	51	25	77	32	64
1:90202004-90203129|69.79|MACS_peak_1047	74	181	112	392	117	306	38	100	65	147	89	160
1:90208864-90209497|58.63|MACS_peak_148	56	61	55	179	51	119	56	123	21	71	59	85
1:90225590-90226453|79.75|MACS_peak_1048	19	77	35	132	28	240	8	28	26	55	13	45
1:90235013-90235793|107.33|MACS_peak_1049	30	59	16	69	29	128	11	43	13	34	15	50
1:90285291-90286258|56.84|MACS_peak_1050	52	181	41	127	74	202	12	82	25	51	68	57
1:90313717-90314612|96.64|MACS_peak_1051	74	161	56	186	83	279	86	146	33	71	118	73
1:90334633-90335844|93.98|MACS_peak_1052	144	361	136	308	161	322	73	195	74	153	105	142
1:90352839-90353867|88.11|MACS_peak_1053	63	223	99	230	35	314	61	185	48	160	86	85
1:90374265-90375066|63.53|MACS_peak_149	114	139	126	244	189	374	179	282	127	208	334	182
1:90402908-90403650|60.24|MACS_peak_125	347	434	309	372	375	205	196	398	121	355	320	300
1:90440559-90441881|71.94|MACS_peak_1054	144	196	178	354	145	245	65	222	60	190	124	101
1:90442566-90443395|111.79|MACS_peak_1055	47	56	65	134	47	186	4	49	25	94	24	56
1:90451779-90452703|72.44|MACS_peak_1056	94	123	172	460	139	178	34	99	92	211	94	95
1:90481144-90481676|74.80|MACS_peak_1057	23	10	20	45	30	60	12	11	20	6	11	32
1:90486105-90487051|72.96|MACS_peak_1058	63	136	63	234	66	248	53	124	52	89	82	104
1:90515667-90516607|131.91|MACS_peak_1059	28	43	36	111	64	164	12	44	39	20	25	59
1:90538862-90539477|71.95|MACS_peak_1060	20	54	23	95	33	97	7	48	13	30	22	30
1:90543852-90545179|172.86|MACS_peak_1061	91	211	108	422	103	510	57	185	70	154	109	132
1:90548569-90549436|178.48|MACS_peak_1062	21	43	21	107	48	158	12	28	23	55	13	56
1:90698354-90699040|105.09|MACS_peak_1063	12	26	22	43	19	117	9	9	13	16	4	44
1:90732805-90733283|64.85|MACS_peak_1064	24	35	22	51	23	74	13	31	12	22	19	34
1:90743652-90744596|74.08|MACS_peak_126	468	813	803	1104	807	1021	382	858	393	831	837	572
1:90758266-90758795|65.04|MACS_peak_1065	14	16	13	55	13	82	7	5	13	21	13	28
1:90775240-90775869|57.80|MACS_peak_127	306	347	310	381	374	424	202	435	165	398	507	242
1:90815180-90815818|67.73|MACS_peak_1066	12	62	13	58	28	97	3	16	23	16	20	28
1:91091336-91092048|62.43|MACS_peak_1067	52	73	35	112	63	122	28	81	31	57	70	66
1:91321593-91322096|53.75|MACS_peak_26	39	54	39	87	43	29	14	41	23	49	27	81
1:91324773-91325418|52.75|MACS_peak_1068	37	26	50	91	40	94	17	35	33	57	21	45
1:91585288-91586192|156.72|MACS_peak_1069	36	47	33	107	64	137	26	31	25	40	35	45
1:91600425-91601372|59.16|MACS_peak_128	485	595	584	844	645	624	283	554	261	664	625	473
1:91615864-91616812|57.36|MACS_peak_27	97	77	63	200	62	110	61	146	85	112	144	127
1:91644468-91645654|180.49|MACS_peak_1070	16	93	60	210	53	274	31	126	33	56	68	64
1:91684895-91686473|170.26|MACS_peak_1071	164	221	185	371	151	390	83	241	87	225	101	106
1:91696739-91697394|72.02|MACS_peak_1072	28	50	13	45	29	81	15	18	17	16	14	26
1:91701332-91701898|63.17|MACS_peak_1073	26	49	32	64	43	69	9	26	12	39	13	46
1:91747528-91748344|130.48|MACS_peak_1074	49	144	45	199	41	176	7	69	24	50	34	71
1:91758603-91759559|76.64|MACS_peak_1075	109	214	140	366	181	317	43	159	63	226	164	151
1:91770270-91771004|52.27|MACS_peak_150	53	136	118	250	106	152	60	167	57	136	113	112
1:91816344-91817327|253.46|MACS_peak_1076	28	51	86	173	56	247	15	69	39	62	16	69
1:91830659-91831396|92.08|MACS_peak_1077	29	54	42	122	56	134	37	34	24	38	33	64
1:91870845-91871633|113.59|MACS_peak_1078	41	59	44	126	21	165	12	47	20	55	25	58
1:91873244-91874245|104.79|MACS_peak_1079	40	79	45	151	62	270	41	38	67	72	56	102
1:92038490-92039429|170.26|MACS_peak_1080	69	258	50	160	53	271	50	72	69	53	50	74
1:92038537-92039303|51.93|MACS_peak_133	65	240	45	147	52	269	49	68	61	46	47	68
1:92050485-92051137|162.57|MACS_peak_1081	19	38	58	159	41	143	17	25	18	55	22	38
1:92174041-92174915|96.55|MACS_peak_1082	33	85	38	138	17	215	24	64	20	58	42	54
1:92259731-92260572|55.80|MACS_peak_151	156	320	206	679	263	729	190	362	129	324	413	226
1:92361576-92362256|76.70|MACS_peak_152	35	48	25	55	28	45	50	106	32	39	57	46
1:92365891-92366914|375.96|MACS_peak_1083	75	137	86	245	78	626	54	133	45	93	96	96
1:92397407-92398451|59.38|MACS_peak_153	320	316	277	362	296	396	287	544	162	336	380	318
1:92516437-92517032|68.07|MACS_peak_1084	13	19	20	45	33	99	2	31	10	19	11	38
1:92656357-92657733|301.32|MACS_peak_1085	88	451	120	352	152	670	77	163	64	135	80	181
1:92664130-92664818|138.95|MACS_peak_1086	35	145	39	131	28	147	2	48	12	45	9	14
1:92665286-92666319|102.02|MACS_peak_1087	60	82	120	259	73	189	20	62	27	78	26	85
1:92676428-92677438|66.90|MACS_peak_134	50	212	46	193	56	246	36	57	41	60	77	67
1:92676449-92677425|134.54|MACS_peak_1088	49	207	46	192	55	246	35	57	41	59	76	67
1:92686479-92687913|77.72|MACS_peak_1089	93	331	173	515	198	508	120	254	76	157	173	208
1:92709027-92710139|186.44|MACS_peak_1090	25	45	37	93	40	190	9	26	40	54	30	54
1:92744578-92745797|186.81|MACS_peak_1091	173	596	246	606	222	727	86	285	93	296	212	224
1:92861081-92862797|92.67|MACS_peak_1092	112	185	101	317	126	361	89	181	90	161	135	171
1:92902392-92903539|102.87|MACS_peak_1093	212	415	129	712	201	692	122	260	101	184	193	187
1:93005211-93010301|86.91|MACS_peak_1094	567	606	555	1253	634	876	221	540	345	694	484	701
1:93088122-93088728|62.30|MACS_peak_1095	22	43	18	82	21	86	10	23	9	15	17	42
1:93120255-93120820|63.96|MACS_peak_1096	5	29	15	60	9	89	9	8	8	13	7	15
1:93271856-93273017|61.27|MACS_peak_1097	160	442	196	509	249	516	131	230	133	225	224	191
1:93414680-93415244|81.49|MACS_peak_1098	12	15	9	57	13	83	3	20	9	15	2	33
1:93668564-93669538|80.48|MACS_peak_129	518	906	747	1131	745	1066	414	835	370	617	782	479
1:94212519-94213449|300.16|MACS_peak_1099	21	93	10	61	20	236	9	18	10	17	11	32
1:94212813-94213318|57.86|MACS_peak_135	18	79	6	43	15	178	8	10	9	11	6	17
1:94250391-94250972|65.12|MACS_peak_1100	24	60	25	82	5	86	16	30	7	16	15	26
1:94262932-94263707|76.79|MACS_peak_136	20	110	17	64	18	54	13	26	18	29	29	20
1:94464813-94465516|82.78|MACS_peak_137	27	104	13	56	6	94	13	17	13	19	4	14
1:94502167-94502860|82.44|MACS_peak_1101	26	73	17	62	15	115	25	38	13	17	22	35
1:94581919-94583305|651.88|MACS_peak_1102	74	485	48	292	82	642	110	149	58	52	47	68
1:94637292-94637969|141.86|MACS_peak_154	48	49	12	92	22	64	90	164	30	44	90	39
1:94689359-94689951|108.23|MACS_peak_1103	34	63	13	66	20	89	12	29	4	12	13	21
1:94897901-94898740|171.96|MACS_peak_1104	12	77	21	163	17	195	31	55	19	32	33	39
1:95016459-95017191|75.40|MACS_peak_1105	72	148	65	125	76	201	53	113	31	57	81	77
1:95159019-95159779|171.54|MACS_peak_1106	22	87	10	57	6	169	11	8	8	4	3	15
1:95255100-95255431|76.22|MACS_peak_155	10	16	6	15	1	13	43	45	6	13	12	20
1:95322095-95322740|84.76|MACS_peak_1107	54	115	69	148	70	175	67	53	71	79	44	56
1:95470357-95470862|64.85|MACS_peak_1108	16	30	15	50	7	80	20	22	7	12	16	19
1:96153675-96154207|57.73|MACS_peak_1109	7	35	7	49	2	69	1	6	4	5	6	7
1:96214896-96215612|131.65|MACS_peak_1110	12	44	18	31	9	139	8	27	15	11	11	22
1:96346533-96346914|63.73|MACS_peak_156	38	45	16	79	21	46	51	93	18	20	34	21
1:96362263-96364043|181.43|MACS_peak_1111	307	425	238	822	203	1195	436	844	179	340	326	268
1:96362325-96363997|82.22|MACS_peak_157	307	424	237	818	201	1192	436	839	179	338	326	263
1:96401264-96402127|126.07|MACS_peak_1112	41	168	66	111	76	240	46	78	48	76	79	53
1:96410733-96411570|78.36|MACS_peak_1113	79	163	36	184	27	224	75	143	33	35	79	49
1:96461644-96462160|82.93|MACS_peak_1114	31	66	13	36	8	85	35	42	9	12	15	17
1:96512826-96513565|130.83|MACS_peak_1115	28	32	12	36	26	136	2	21	11	10	17	22
1:97628816-97629426|54.66|MACS_peak_28	114	59	24	90	60	49	66	159	42	50	105	78
1:97629882-97630817|63.41|MACS_peak_1116	102	143	82	147	100	264	82	180	57	57	135	74
1:97660374-97662656|205.99|MACS_peak_130	4079	5505	4965	5396	5914	4967	4430	6349	2775	4833	7722	3190
1:97660438-97662532|50.85|MACS_peak_158	4070	5487	4938	5358	5901	4936	4424	6332	2768	4825	7711	3181
1:97851470-97852415|265.19|MACS_peak_1117	22	165	14	77	16	241	12	23	24	8	23	20
1:97851607-97852313|110.57|MACS_peak_138	20	145	13	65	15	210	11	19	21	4	21	20
1:97863047-97864031|60.88|MACS_peak_159	133	109	54	108	84	126	129	246	65	60	133	104
1:97876155-97876488|54.09|MACS_peak_29	16	5	7	26	7	8	20	42	16	7	33	38
1:97878705-97879389|90.21|MACS_peak_1118	31	95	16	52	14	115	31	58	12	18	30	24
1:97887338-97887981|91.63|MACS_peak_1119	44	76	20	52	23	119	38	40	13	29	31	14
1:97900547-97901174|77.33|MACS_peak_1120	11	81	20	49	20	125	17	33	8	19	18	16
1:97903802-97904733|535.86|MACS_peak_1121	24	93	42	129	69	336	10	38	16	36	20	20
1:97916065-97916777|83.84|MACS_peak_1122	46	125	31	129	26	155	78	50	45	36	42	22
1:97921802-97922751|107.94|MACS_peak_1123	63	207	21	129	42	232	82	120	35	51	52	70
1:97944002-97945015|136.06|MACS_peak_1124	69	186	65	176	41	361	86	117	50	59	110	49
1:97976633-97977635|79.07|MACS_peak_131	545	1099	676	1260	729	1281	550	931	439	699	986	465
1:98071981-98072451|53.09|MACS_peak_1125	20	37	18	62	27	52	23	46	22	24	20	18
1:98188088-98188826|90.08|MACS_peak_139	21	176	13	89	11	80	16	30	22	26	17	26
1:98720234-98720956|84.33|MACS_peak_1126	73	93	15	37	4	129	37	92	14	16	27	16
1:99317351-99318198|84.02|MACS_peak_160	106	112	69	115	78	149	143	247	67	100	136	93
1:99668683-99669515|137.38|MACS_peak_1127	16	64	24	120	24	165	15	41	37	40	33	34
1:99868267-99868701|93.98|MACS_peak_161	14	15	7	49	5	43	43	74	20	23	22	29
1:99907336-99907898|52.58|MACS_peak_1128	25	23	13	35	10	97	4	18	8	13	7	24
1:100020344-100020902|65.27|MACS_peak_1129	6	59	4	48	5	99	11	5	9	12	4	14
1:100106521-100107062|60.17|MACS_peak_1130	22	18	11	52	18	83	11	30	9	12	14	22
1:100210979-100211601|61.85|MACS_peak_1131	14	56	5	48	13	102	3	7	9	2	8	4
1:100234043-100235002|253.49|MACS_peak_1132	30	102	61	229	35	257	42	43	43	65	34	44
1:100350052-100350814|221.54|MACS_peak_1133	29	106	23	87	13	191	18	45	12	18	21	33
1:100519233-100519977|110.61|MACS_peak_1134	40	135	12	77	14	139	32	61	12	23	10	31
1:100779353-100780436|335.99|MACS_peak_1135	24	132	19	106	24	332	14	25	13	21	22	21
1:100779440-100780233|75.68|MACS_peak_140	21	121	14	90	20	289	13	23	10	19	17	15
1:100800857-100801703|85.29|MACS_peak_1136	33	161	45	159	36	155	56	91	33	39	42	46
1:100927982-100928923|257.54|MACS_peak_1137	17	139	24	234	27	296	53	61	38	42	66	35
1:100940337-100941688|419.98|MACS_peak_1138	85	269	43	296	83	485	68	233	18	34	89	110
1:100940838-100941583|75.78|MACS_peak_62	63	206	25	217	46	332	50	127	10	20	49	54
1:101124689-101125604|212.72|MACS_peak_1139	23	130	36	234	24	359	71	104	75	77	98	56
1:101358139-101358696|92.39|MACS_peak_1140	15	41	24	53	15	96	28	37	15	9	38	14
1:102025600-102026492|146.01|MACS_peak_1141	15	98	14	131	7	202	27	30	7	21	40	35
1:102422753-102423427|50.17|MACS_peak_1142	32	35	13	105	12	139	52	42	23	30	38	47
1:102537693-102538205|70.08|MACS_peak_1143	14	49	9	61	8	113	8	25	7	3	10	6
1:102805844-102806940|279.25|MACS_peak_1144	47	169	44	172	24	277	22	32	22	35	26	25
1:102805976-102806947|118.82|MACS_peak_141	44	165	43	168	23	272	20	26	19	35	26	23
1:103703996-103704672|98.10|MACS_peak_1145	7	41	9	104	9	146	25	51	12	6	19	13
1:104064170-104064794|73.67|MACS_peak_1146	22	84	7	103	9	106	12	26	12	16	28	17
1:104287188-104288070|120.43|MACS_peak_142	60	165	14	87	2	154	29	36	10	21	26	21
1:104287441-104288015|79.36|MACS_peak_1147	40	130	11	66	2	112	21	29	7	20	22	17
1:104430851-104431547|121.83|MACS_peak_1148	20	28	9	72	9	148	16	22	9	2	5	21
1:104458995-104459513|60.30|MACS_peak_1149	9	35	13	74	8	82	3	14	4	13	4	16
1:104496080-104496741|97.78|MACS_peak_143	26	114	25	164	16	103	37	30	18	41	35	27
1:104496107-104496570|53.78|MACS_peak_1150	19	94	18	111	11	75	25	23	12	27	26	21
1:104566263-104567059|250.49|MACS_peak_1151	65	210	32	135	37	300	42	73	12	22	42	50
1:104580174-104581062|278.91|MACS_peak_1152	20	57	30	92	24	239	16	28	16	15	8	30
1:104740823-104741621|83.50|MACS_peak_1153	34	98	30	85	28	156	36	38	22	26	36	35
1:104932848-104933495|59.51|MACS_peak_144	21	104	13	31	18	148	15	22	20	27	11	20
1:104932853-104933566|152.96|MACS_peak_1154	21	106	12	31	18	148	15	23	21	27	11	21
1:104962155-104962706|54.41|MACS_peak_1155	15	77	6	33	14	102	22	41	10	15	18	14
1:105049966-105051484|78.55|MACS_peak_1156	140	253	51	223	83	367	126	157	44	49	153	106
1:105256859-105257343|56.25|MACS_peak_162	61	35	17	25	4	24	72	94	10	23	30	21
1:105263369-105263896|50.25|MACS_peak_30	62	37	21	49	47	21	69	73	20	19	90	51
1:105325099-105326018|117.31|MACS_peak_1157	34	81	27	107	18	202	34	43	13	33	32	46
1:105423378-105423785|67.92|MACS_peak_31	52	30	28	61	8	45	56	42	24	33	85	35
1:105439932-105440843|390.87|MACS_peak_1158	42	59	22	102	44	291	27	25	28	38	24	33
1:105843842-105845170|77.20|MACS_peak_132	1039	1318	1069	1127	1250	1229	839	1074	541	713	1502	686
1:105981103-105981723|217.93|MACS_peak_1159	18	41	16	77	13	148	7	9	14	22	14	26
1:105989691-105992168|58.01|MACS_peak_133	3952	5854	4749	6094	5521	5703	4848	6405	3192	5059	6995	3128
1:105993304-105994288|73.49|MACS_peak_134	548	1240	697	988	707	1127	748	927	448	611	1173	476
1:106018412-106019342|521.75|MACS_peak_1160	40	169	25	96	26	364	16	19	10	24	18	28
1:106018608-106019285|154.38|MACS_peak_145	36	155	18	88	25	342	11	16	7	18	17	20
1:106036967-106037582|54.81|MACS_peak_135	174	166	149	223	146	199	135	172	151	113	208	124
1:106131810-106132783|139.26|MACS_peak_1161	100	154	80	361	82	414	111	127	124	100	189	95
1:106145847-106146378|88.95|MACS_peak_1162	4	18	19	49	16	96	10	18	4	14	5	21
1:106170964-106173651|214.01|MACS_peak_136	4056	6809	5517	7628	6187	6601	4393	6644	2770	5404	6467	3582
1:106192724-106193434|173.93|MACS_peak_1163	41	60	42	145	37	166	18	33	26	37	23	42
1:106193627-106194448|69.99|MACS_peak_1164	65	122	64	203	58	166	57	96	45	83	69	44
1:106237929-106238515|90.42|MACS_peak_1165	16	40	12	64	9	98	13	13	15	7	13	22
1:106240157-106241391|115.16|MACS_peak_1166	134	253	59	213	95	261	105	213	39	75	88	78
1:106272810-106273572|233.44|MACS_peak_1167	18	105	34	158	9	242	15	42	26	26	39	17
1:106277070-106277988|218.75|MACS_peak_1168	99	244	82	398	121	476	82	84	59	95	123	81
1:106277093-106277897|105.65|MACS_peak_146	95	239	79	372	120	458	79	78	57	93	120	79
1:106288848-106290128|403.47|MACS_peak_1169	51	118	41	239	39	432	39	81	13	37	46	64
1:106289307-106289987|55.50|MACS_peak_63	34	76	31	168	27	332	33	57	9	24	29	40
1:106385978-106386549|60.92|MACS_peak_1170	6	51	13	57	7	93	12	22	6	28	24	13
1:106400529-106401884|135.89|MACS_peak_1171	107	299	83	151	109	412	88	126	103	93	112	125
1:106460878-106461438|117.46|MACS_peak_1172	13	28	25	41	20	112	5	11	12	14	11	29
1:106477050-106479126|154.87|MACS_peak_1173	197	266	171	523	169	827	179	283	127	217	241	145
1:106502779-106503747|632.73|MACS_peak_1174	22	158	46	261	37	492	37	24	23	12	24	33
1:106502894-106503617|58.78|MACS_peak_64	17	143	39	242	33	477	36	20	15	9	17	22
1:106502951-106503534|78.98|MACS_peak_147	16	134	29	229	33	464	24	16	12	9	13	19
1:106586625-106587207|69.61|MACS_peak_137	121	72	84	69	93	75	48	96	67	82	105	75
1:106588994-106589891|57.62|MACS_peak_1175	32	46	57	117	29	198	29	101	53	49	47	64
1:106602726-106603955|53.33|MACS_peak_1176	172	283	105	300	134	414	163	181	91	100	230	106
1:106617820-106618648|108.23|MACS_peak_1177	45	92	28	122	35	185	20	29	47	29	30	74
1:106626885-106627774|242.88|MACS_peak_1178	24	43	28	87	36	221	19	22	32	53	35	39
1:106656487-106657432|157.69|MACS_peak_1179	38	58	46	126	52	228	30	43	41	44	35	58
1:106795792-106797029|52.75|MACS_peak_138	1065	1964	1282	2322	1292	2019	1317	1670	900	1403	1848	848
1:106938636-106939082|57.22|MACS_peak_1180	2	42	4	29	4	83	4	4	6	7	8	15
1:107437182-107437769|76.68|MACS_peak_1181	14	57	28	49	23	108	4	4	5	3	5	7
1:107444257-107445030|61.87|MACS_peak_148	11	151	15	82	8	210	30	28	9	20	7	26
1:107444257-107445107|177.94|MACS_peak_1182	11	152	16	82	8	213	30	28	9	20	7	28
1:107679187-107679688|58.42|MACS_peak_149	13	71	4	25	0	44	3	13	4	6	4	6
1:107741774-107742999|638.04|MACS_peak_1183	18	212	18	259	21	530	14	50	32	35	26	50
1:107742009-107742829|71.06|MACS_peak_150	12	203	12	237	15	494	13	48	28	29	24	39
1:107742025-107742755|73.24|MACS_peak_65	12	199	11	227	15	489	13	46	27	29	21	35
1:107782942-107783607|52.91|MACS_peak_151	90	143	37	90	29	68	54	74	25	47	78	57
1:107837731-107838319|63.85|MACS_peak_1184	13	38	7	125	4	110	17	9	9	7	23	18
1:107908262-107909004|63.38|MACS_peak_163	95	104	28	83	42	54	125	215	14	25	79	63
1:107916891-107917509|66.35|MACS_peak_1185	13	69	12	76	28	89	17	51	8	24	8	28
1:107918185-107918941|87.08|MACS_peak_1186	62	78	19	83	30	108	30	90	18	11	42	21
1:107927898-107928823|92.20|MACS_peak_1187	49	134	48	138	37	212	40	99	30	42	43	73
1:108181496-108182515|77.73|MACS_peak_1188	103	167	53	187	60	319	108	111	26	65	127	75
1:108231513-108232047|58.59|MACS_peak_1189	38	86	27	106	8	90	29	29	19	23	28	25
1:108389312-108389859|104.67|MACS_peak_1190	7	32	3	54	11	104	4	15	7	6	16	13
1:108470319-108470625|71.01|MACS_peak_1191	7	27	4	38	3	77	17	4	4	3	0	10
1:108471214-108471649|55.09|MACS_peak_1192	8	22	7	35	4	68	0	8	10	6	1	11
1:108891119-108892055|127.88|MACS_peak_1193	27	99	42	125	15	168	24	41	22	46	18	39
1:109170700-109171530|188.92|MACS_peak_1194	20	122	17	111	7	175	30	59	10	14	18	24
1:109863722-109864503|61.44|MACS_peak_152	41	147	21	121	5	189	30	57	12	13	19	39
1:109863753-109864494|158.97|MACS_peak_1195	39	147	20	118	5	186	30	54	12	13	19	39
1:110799092-110799622|66.44|MACS_peak_1196	15	40	27	41	15	92	16	27	7	24	17	25
1:111590906-111591805|269.06|MACS_peak_1197	26	174	28	119	27	238	27	77	13	12	28	29
1:111633923-111634469|52.22|MACS_peak_1198	143	183	90	196	82	160	81	102	42	64	95	53
1:111864017-111865273|188.62|MACS_peak_139	1519	2587	1740	2783	2125	2734	1771	2369	1245	1873	2891	1267
1:112222112-112222619|75.65|MACS_peak_1199	4	71	3	31	8	82	9	11	2	6	4	8
1:112416401-112417240|96.95|MACS_peak_140	635	757	494	888	587	877	679	844	444	579	1046	379
1:112418196-112419055|85.34|MACS_peak_1200	94	93	23	60	53	154	33	108	29	47	59	44
1:112716148-112716642|78.56|MACS_peak_1201	3	16	9	44	19	86	9	11	14	6	15	15
1:112748460-112749108|109.18|MACS_peak_1202	14	57	4	82	9	115	6	20	1	10	5	9
1:112762989-112763713|110.34|MACS_peak_1203	15	102	13	125	12	165	32	18	17	19	53	19
1:112763038-112763578|68.93|MACS_peak_153	14	98	10	116	9	153	30	17	13	18	51	16
1:112968960-112969897|353.79|MACS_peak_1204	24	84	21	87	23	300	5	31	14	28	12	28
1:113112936-113113878|254.64|MACS_peak_1205	26	162	11	100	13	245	15	35	27	10	15	20
1:113112944-113113804|121.18|MACS_peak_154	25	161	10	96	13	233	15	33	26	7	12	19
1:113281224-113281851|114.33|MACS_peak_1206	11	80	8	94	6	132	8	22	17	12	15	12
1:113296542-113297180|80.09|MACS_peak_1207	10	44	23	76	12	106	25	19	8	25	18	22
1:113297854-113298342|52.86|MACS_peak_1208	20	51	12	46	16	81	18	12	12	9	24	20
1:113332549-113333620|150.41|MACS_peak_155	73	195	37	54	54	120	21	55	11	35	21	56
1:113332678-113333412|98.69|MACS_peak_1209	57	177	31	44	51	106	19	47	10	26	18	41
1:113505925-113506517|71.39|MACS_peak_1210	10	11	13	13	17	89	7	10	1	10	6	13
1:113539453-113540664|97.70|MACS_peak_1211	215	288	88	199	111	369	84	206	43	78	137	98
1:113703448-113704076|67.00|MACS_peak_156	53	83	26	62	11	68	14	24	11	21	31	48
1:113992656-113993268|63.59|MACS_peak_1212	15	16	5	25	14	88	7	13	4	24	7	13
1:114037607-114038469|212.19|MACS_peak_1213	9	198	10	111	12	187	37	13	13	22	37	26
1:114037615-114038450|135.50|MACS_peak_157	9	197	10	108	11	186	37	13	13	22	37	26
1:114039068-114039898|131.19|MACS_peak_158	35	190	21	81	17	252	30	39	10	27	29	32
1:114039141-114039975|275.53|MACS_peak_1214	37	199	22	80	18	256	33	40	10	28	29	32
1:114682016-114682675|203.69|MACS_peak_1215	14	122	8	99	3	175	20	32	16	14	10	25
1:114682067-114682663|59.05|MACS_peak_159	14	121	8	95	3	173	20	31	16	13	10	24
1:114881757-114882082|70.86|MACS_peak_164	13	6	7	13	6	26	53	48	5	15	18	13
1:115417676-115418142|77.92|MACS_peak_165	13	23	26	64	25	40	35	76	44	34	76	40
1:115819781-115820449|109.23|MACS_peak_1216	24	41	10	25	30	104	20	53	11	7	27	27
1:115839455-115840070|88.62|MACS_peak_1217	10	68	12	42	7	110	8	8	13	9	18	31
1:115943998-115944586|52.14|MACS_peak_160	24	80	10	32	6	99	8	6	12	7	19	22
1:116010182-116010744|66.18|MACS_peak_1218	22	62	14	107	7	115	22	50	2	20	33	19
1:116071374-116072128|79.31|MACS_peak_1219	55	109	15	82	24	136	64	94	6	17	54	25
1:116097955-116098509|79.12|MACS_peak_1220	4	24	8	25	8	98	6	18	11	13	17	16
1:116128332-116129348|68.63|MACS_peak_1221	97	213	83	131	58	251	77	150	45	107	94	67
1:116171032-116171958|320.13|MACS_peak_1222	25	69	21	154	51	276	34	43	16	41	20	25
1:116313181-116313952|56.99|MACS_peak_1223	45	114	20	90	41	139	57	66	16	27	67	48
1:116391291-116392034|66.97|MACS_peak_1224	84	103	39	112	35	147	86	194	36	31	49	39
1:116392127-116393248|115.34|MACS_peak_1225	98	275	55	438	41	569	224	383	71	88	181	98
1:116494679-116495360|120.62|MACS_peak_1226	10	39	6	119	8	139	12	10	16	12	11	21
1:116596690-116597146|51.13|MACS_peak_1227	13	60	2	49	8	59	10	11	2	5	9	8
1:117020593-117021143|55.51|MACS_peak_32	36	111	22	99	37	65	92	178	33	91	105	64
1:117318519-117319323|146.06|MACS_peak_1228	22	35	24	139	17	167	34	49	12	21	40	30
1:118263527-118264703|263.59|MACS_peak_1229	89	140	56	215	57	370	43	64	19	38	45	62
1:118287344-118288011|134.28|MACS_peak_1230	30	109	18	87	16	158	5	17	13	32	8	37
1:118287358-118287997|60.51|MACS_peak_161	28	109	18	85	15	156	5	17	13	31	8	37
1:118310699-118311725|58.00|MACS_peak_141	640	1479	944	1833	1043	1617	641	963	521	895	1111	586
1:118399194-118399793|76.89|MACS_peak_1231	26	33	26	99	11	115	10	25	22	37	12	46
1:118428300-118428934|107.71|MACS_peak_1232	19	53	19	89	17	123	31	33	11	39	14	29
1:118446797-118447415|70.63|MACS_peak_1233	25	70	15	93	12	127	9	35	17	20	9	16
1:118449257-118449842|86.03|MACS_peak_1234	12	63	27	72	13	99	17	19	18	27	8	38
1:118472267-118472838|72.18|MACS_peak_1235	20	26	23	95	15	115	8	9	2	25	8	26
1:118480773-118481826|195.82|MACS_peak_1236	24	101	25	181	17	231	14	44	27	68	29	49
1:118498019-118498933|53.91|MACS_peak_1237	141	289	174	420	207	363	139	268	149	209	223	179
1:118673539-118674608|164.83|MACS_peak_1238	41	73	54	292	51	291	34	40	26	48	73	60
1:118673595-118674629|69.91|MACS_peak_66	40	73	51	291	47	289	34	37	25	47	71	59
1:118700866-118701609|81.49|MACS_peak_1239	27	69	18	86	22	174	32	49	24	27	55	34
1:118776344-118777300|93.63|MACS_peak_166	338	622	279	1050	323	1202	459	805	249	404	694	315
1:118836688-118837207|50.86|MACS_peak_162	25	72	39	42	9	30	20	21	22	30	9	49
1:118851720-118852877|457.86|MACS_peak_1240	72	304	29	171	84	478	75	108	49	63	69	84
1:118857671-118858673|69.21|MACS_peak_1241	112	258	129	369	130	403	145	269	120	198	172	152
1:118858837-118859949|144.24|MACS_peak_1242	120	435	153	491	151	668	126	269	110	201	202	166
1:118880846-118881332|51.71|MACS_peak_167	31	31	40	81	25	34	51	103	60	65	67	65
1:118901711-118902647|107.72|MACS_peak_142	223	250	263	228	137	193	281	394	201	339	267	162
1:118910502-118911403|52.80|MACS_peak_1243	120	215	101	333	115	258	87	159	69	142	137	113
1:118916329-118918424|63.44|MACS_peak_1244	235	491	292	655	275	713	148	347	160	407	334	300
1:118935529-118936720|94.87|MACS_peak_1245	89	119	70	177	69	258	34	83	42	102	70	116
1:118940866-118941977|51.87|MACS_peak_1246	84	139	105	210	73	323	110	165	57	125	152	127
1:118954449-118955476|62.78|MACS_peak_168	187	254	200	392	184	427	292	411	140	303	443	217
1:118987341-118988126|56.21|MACS_peak_1247	35	68	46	135	49	183	132	131	55	94	94	53
1:118987518-118988079|85.07|MACS_peak_169	31	52	35	113	36	167	109	120	46	87	86	45
1:118990605-118991220|64.84|MACS_peak_170	79	79	71	105	59	80	54	180	40	78	105	70
1:119025570-119026287|55.41|MACS_peak_1248	20	39	33	108	32	105	25	38	17	50	43	47
1:119033167-119034488|124.11|MACS_peak_1249	156	271	146	510	204	572	117	246	84	257	200	177
1:119082292-119083063|68.26|MACS_peak_1250	54	75	55	113	62	102	26	69	12	50	42	36
1:119106216-119106932|73.71|MACS_peak_171	67	151	89	206	117	188	88	224	81	105	207	107
1:119108475-119109024|60.73|MACS_peak_1251	32	57	18	52	15	94	20	9	23	17	8	24
1:119140494-119141360|277.24|MACS_peak_1252	41	47	33	75	39	246	13	32	8	39	10	48
1:119170578-119171335|181.54|MACS_peak_1253	68	156	47	112	35	253	44	52	54	72	65	27
1:119170632-119171271|69.48|MACS_peak_163	63	156	47	108	33	245	43	51	52	70	64	22
1:119181038-119181724|109.78|MACS_peak_1254	26	38	27	49	19	127	14	13	23	24	21	30
1:119288562-119288922|51.32|MACS_peak_33	28	11	24	25	17	10	15	38	19	30	49	27
1:119407638-119408352|57.05|MACS_peak_172	77	86	44	97	43	87	81	163	46	72	105	59
1:119504175-119505412|56.06|MACS_peak_143	1387	2603	1884	3040	2075	2686	1688	2328	1044	1823	2460	1199
1:119648148-119649324|52.01|MACS_peak_144	895	1922	1380	2192	1590	1876	1017	1741	739	1425	1830	958
1:119804142-119805293|140.88|MACS_peak_1255	32	127	41	316	38	241	21	50	29	69	38	48
1:119819175-119819780|56.96|MACS_peak_1256	1	90	8	52	2	105	7	6	14	12	6	12
1:119819195-119819718|50.35|MACS_peak_164	0	88	8	48	2	96	5	6	14	11	5	10
1:119865213-119865848|67.52|MACS_peak_1257	9	68	14	32	19	107	11	24	3	26	10	23
1:119871961-119872955|308.03|MACS_peak_1258	37	119	14	115	29	287	57	87	14	44	33	33
1:120036953-120037553|64.28|MACS_peak_1259	29	46	21	65	35	83	20	45	31	12	30	24
1:120139836-120140685|149.78|MACS_peak_1260	33	157	30	123	18	213	20	29	31	46	34	60
1:120139892-120140668|104.67|MACS_peak_165	33	155	29	123	18	212	19	27	30	46	33	53
1:120161429-120162325|199.02|MACS_peak_1261	30	78	28	150	23	253	31	51	20	35	41	40
1:120176186-120176938|97.21|MACS_peak_1262	43	66	33	148	41	170	38	46	29	70	39	55
1:120226581-120227285|71.18|MACS_peak_1263	67	80	42	148	53	109	37	46	53	62	43	45
1:120357143-120358100|56.64|MACS_peak_1264	101	225	99	277	96	285	120	210	110	127	164	118
1:120398411-120399088|59.25|MACS_peak_1265	39	51	34	93	52	123	30	48	8	38	44	48
1:120424245-120425440|230.10|MACS_peak_1266	62	278	43	269	76	292	61	93	26	88	71	44
1:120424307-120425399|74.33|MACS_peak_166	57	273	39	261	73	285	56	87	26	83	69	35
1:120424392-120425345|82.61|MACS_peak_67	51	259	36	241	69	272	50	79	21	66	64	30
1:120458409-120459526|108.09|MACS_peak_1267	93	236	77	262	113	350	81	122	53	69	101	101
1:120466226-120467486|77.42|MACS_peak_1268	101	211	100	261	116	313	67	161	70	147	151	111
1:120549045-120550684|110.56|MACS_peak_1269	229	352	165	440	168	480	157	277	113	204	267	153
1:120558359-120559229|68.87|MACS_peak_1270	18	117	25	168	27	214	49	56	15	30	59	71
1:120609562-120611234|193.62|MACS_peak_1271	118	387	260	775	176	433	71	234	140	276	96	173
1:120682392-120683113|123.01|MACS_peak_1272	36	39	25	129	24	177	22	24	23	37	24	46
1:120745024-120745794|230.60|MACS_peak_1273	31	94	14	71	19	201	20	24	12	20	24	39
1:120752766-120753642|131.82|MACS_peak_1274	41	39	30	93	39	195	22	42	24	28	36	49
1:120812314-120813071|69.00|MACS_peak_1275	42	52	38	130	51	151	23	32	20	40	42	52
1:120816008-120816773|145.47|MACS_peak_1276	22	59	32	128	32	172	32	76	14	39	31	30
1:120963585-120964630|72.23|MACS_peak_1277	186	521	288	374	246	473	138	255	125	213	260	147
1:121050645-121051841|64.67|MACS_peak_1278	143	190	86	296	69	266	96	213	64	117	111	86
1:121068010-121068752|124.38|MACS_peak_1279	32	91	21	120	24	193	46	54	12	49	45	28
1:121084008-121084557|71.29|MACS_peak_1280	20	56	20	70	5	98	24	36	20	28	17	25
1:121122342-121123372|67.56|MACS_peak_173	134	137	43	79	61	95	142	300	17	42	86	74
1:121263800-121264700|56.15|MACS_peak_167	52	135	43	125	20	92	20	53	16	57	21	38
1:121297764-121298451|155.01|MACS_peak_1281	24	138	24	91	22	163	22	28	7	22	22	21
1:121297804-121298443|97.78|MACS_peak_168	21	137	22	85	21	156	21	28	6	22	18	21
1:121311947-121312942|277.00|MACS_peak_1282	43	144	50	240	47	464	30	75	46	42	73	70
1:121314749-121315561|55.88|MACS_peak_145	242	325	215	196	272	150	131	279	103	185	253	207
1:121360382-121361036|112.58|MACS_peak_1283	34	63	34	84	24	118	24	33	27	36	21	32
1:121370593-121372489|51.99|MACS_peak_1284	208	671	293	949	247	1149	283	671	214	364	360	347
1:121448359-121449041|88.18|MACS_peak_1285	35	27	13	107	41	123	9	20	29	13	17	43
1:121527136-121528931|51.00|MACS_peak_169	662	1080	631	1303	613	954	525	702	445	639	824	429
1:121527352-121528914|54.73|MACS_peak_146	636	1056	622	1260	601	932	510	673	427	621	814	417
1:121662585-121663293|110.66|MACS_peak_34	129	54	50	48	30	27	115	147	15	33	85	57
1:121770761-121771489|66.62|MACS_peak_1286	69	89	38	86	37	123	23	55	21	37	34	51
1:121963284-121963980|116.97|MACS_peak_1287	15	89	12	40	12	134	11	25	10	7	11	17
1:122121471-122122176|69.50|MACS_peak_1288	46	72	50	143	57	118	34	85	38	93	38	55
1:122277019-122277936|68.10|MACS_peak_1289	37	70	33	125	46	150	48	63	30	40	55	44
1:122324415-122325280|318.53|MACS_peak_1290	31	54	14	168	39	280	6	39	18	52	24	25
1:122333013-122333880|329.51|MACS_peak_1291	44	138	15	120	32	325	28	54	21	28	46	23
1:122351339-122352047|95.76|MACS_peak_1292	30	114	23	89	29	124	48	68	13	40	28	21
1:122454560-122455582|108.60|MACS_peak_1293	41	236	21	250	31	395	124	132	54	72	166	63
1:122477689-122478730|212.32|MACS_peak_174	57	198	16	89	23	193	295	481	79	90	219	153
1:122477765-122478524|62.23|MACS_peak_35	41	184	16	81	19	173	275	445	75	77	191	128
1:122509787-122510367|91.79|MACS_peak_1294	19	27	6	39	17	104	15	41	15	24	13	20
1:122551648-122552110|62.72|MACS_peak_1295	19	36	8	40	11	81	0	13	2	15	11	17
1:122574879-122575332|69.15|MACS_peak_1296	13	19	15	65	9	77	5	15	11	13	11	13
1:123000162-123001008|195.06|MACS_peak_1297	15	44	22	149	6	204	9	27	12	23	23	22
1:123000306-123000944|52.07|MACS_peak_68	13	40	17	137	6	184	8	22	11	19	21	13
1:123083975-123084657|145.80|MACS_peak_1298	8	26	16	51	25	145	14	22	16	15	15	23
1:123476477-123476870|54.82|MACS_peak_1299	10	31	7	33	11	57	11	16	4	2	11	15
1:123503600-123504254|86.96|MACS_peak_1300	29	36	18	78	19	111	25	36	19	21	27	20
1:123553713-123554261|51.06|MACS_peak_1301	13	21	15	87	11	93	17	12	16	19	5	18
1:123602155-123602713|65.27|MACS_peak_1302	14	23	23	72	15	78	32	45	9	29	11	15
1:123848099-123848545|52.98|MACS_peak_1303	5	28	6	48	14	66	15	12	3	7	10	14
1:124044794-124046476|93.01|MACS_peak_147	1313	2373	1399	2150	1622	2096	1345	1931	859	1308	2136	1053
1:124067981-124068500|91.83|MACS_peak_1304	15	19	3	90	12	103	6	21	13	10	7	12
1:124104277-124105076|83.19|MACS_peak_175	144	299	79	220	105	116	262	421	57	132	251	132
1:124104319-124105035|64.08|MACS_peak_36	140	293	79	218	105	112	259	416	55	132	251	126
1:124208317-124208695|65.58|MACS_peak_176	10	16	8	32	5	21	16	45	6	16	8	9
1:124364538-124365891|444.80|MACS_peak_1305	42	171	34	283	22	372	34	56	33	57	31	43
1:124364647-124365632|87.91|MACS_peak_69	35	146	30	244	18	350	29	43	17	38	25	31
1:124399832-124400382|75.48|MACS_peak_1306	14	58	16	61	14	99	16	17	6	24	10	23
1:124409589-124410154|51.95|MACS_peak_177	40	27	13	27	20	21	28	89	11	19	38	24
1:124492482-124493076|128.17|MACS_peak_1307	23	92	11	59	11	137	39	43	4	20	26	19
1:124541691-124542411|128.45|MACS_peak_178	51	26	16	53	22	22	100	149	34	32	84	44
1:124547821-124548291|55.65|MACS_peak_148	76	98	89	69	61	59	65	81	77	114	67	62
1:124568849-124569432|101.38|MACS_peak_179	28	28	10	39	17	34	65	117	19	22	39	31
1:124704779-124705834|360.12|MACS_peak_1308	63	202	55	208	41	499	137	274	62	60	102	49
1:124704933-124705601|68.28|MACS_peak_180	50	183	49	181	38	472	122	249	56	51	90	41
1:124979832-124980759|107.28|MACS_peak_1309	85	90	47	201	35	201	61	90	43	50	34	53
1:125027639-125028323|123.30|MACS_peak_1310	37	119	8	38	19	139	49	47	14	13	30	23
1:125236867-125237637|68.58|MACS_peak_149	223	311	140	184	266	262	189	241	136	87	294	143
1:125326906-125327579|106.51|MACS_peak_1311	30	92	38	146	14	124	39	46	43	47	32	29
1:125362744-125363638|391.60|MACS_peak_1312	28	82	20	140	10	315	28	43	16	28	28	33
1:125461682-125462743|535.33|MACS_peak_1313	38	191	34	193	28	448	28	58	25	36	52	40
1:125461821-125462588|54.75|MACS_peak_170	32	171	32	173	26	419	23	54	22	30	46	27
1:125701588-125702910|419.44|MACS_peak_1314	71	189	36	229	48	459	96	100	52	50	83	61
1:125711812-125712949|165.76|MACS_peak_1315	38	80	36	196	45	363	106	129	59	95	53	99
1:125711926-125712484|52.50|MACS_peak_181	24	51	20	138	27	249	79	97	35	60	41	66
1:125773197-125774135|141.98|MACS_peak_1316	122	248	60	256	75	315	138	238	51	82	111	78
1:125779839-125780400|55.49|MACS_peak_171	29	69	18	59	37	57	20	18	18	29	26	29
1:125825226-125825643|56.19|MACS_peak_37	28	35	23	35	16	24	21	51	29	21	56	37
1:125938555-125939285|73.32|MACS_peak_1317	26	69	25	73	41	134	38	71	21	47	50	48
1:125962053-125962569|64.91|MACS_peak_1318	7	38	8	37	11	70	14	19	5	12	26	27
1:125979146-125980479|56.80|MACS_peak_1319	164	402	107	266	95	387	115	279	94	132	150	118
1:126020942-126021490|61.88|MACS_peak_182	25	58	27	103	18	102	70	126	24	48	104	50
1:126035039-126035889|281.82|MACS_peak_1320	22	219	25	182	16	244	22	28	15	25	31	31
1:126035097-126035860|109.10|MACS_peak_172	19	215	22	176	15	240	19	28	15	23	31	28
1:126041032-126041824|194.78|MACS_peak_1321	42	135	10	59	8	184	36	78	30	14	21	30
1:126076944-126077537|71.20|MACS_peak_1322	11	48	23	102	14	108	8	20	32	19	12	25
1:126123792-126124503|117.16|MACS_peak_1323	26	101	17	89	15	166	23	58	27	41	34	38
1:126153422-126154066|69.99|MACS_peak_173	23	101	20	77	16	91	12	18	31	15	24	31
1:126153425-126153929|68.19|MACS_peak_1324	18	82	17	66	14	82	11	13	27	10	22	23
1:126159083-126159633|51.91|MACS_peak_174	20	83	10	32	4	41	2	14	12	21	2	10
1:126170804-126171595|132.76|MACS_peak_1325	42	82	12	77	21	169	30	82	12	28	35	21
1:126230764-126232256|292.12|MACS_peak_1326	95	395	82	489	90	785	103	132	91	68	161	99
1:126230917-126232180|67.92|MACS_peak_175	90	389	80	460	88	773	99	120	87	62	160	95
1:126278051-126278684|82.81|MACS_peak_1327	29	58	10	69	10	122	13	30	20	19	18	34
1:126291630-126292456|125.19|MACS_peak_176	32	147	20	66	13	151	19	26	8	14	4	29
1:126291772-126292465|137.62|MACS_peak_1328	26	135	18	57	12	141	17	19	4	10	4	25
1:126355917-126356501|71.80|MACS_peak_1329	22	73	13	56	18	97	24	22	7	12	10	37
1:126364327-126365298|250.81|MACS_peak_1330	24	227	53	105	64	354	54	91	30	46	72	60
1:126379541-126380646|387.42|MACS_peak_1331	26	186	64	286	41	352	30	56	32	72	46	52
1:126379675-126380552|69.00|MACS_peak_177	25	172	58	263	35	329	24	50	29	65	39	43
1:126436626-126437575|113.25|MACS_peak_1332	42	179	42	199	36	225	50	105	46	55	64	70
1:126492209-126493260|68.50|MACS_peak_150	480	832	520	1034	505	863	370	679	352	534	696	403
1:126546951-126548780|98.17|MACS_peak_1333	260	743	197	483	208	777	139	474	99	223	212	198
1:126557663-126558427|73.71|MACS_peak_183	130	137	58	94	96	98	141	235	60	73	143	95
1:126560857-126561666|139.34|MACS_peak_1334	32	188	21	89	18	194	30	42	26	21	51	27
1:126560877-126561625|91.89|MACS_peak_178	32	187	21	88	18	193	29	42	26	21	51	27
1:126570367-126571404|207.38|MACS_peak_1335	43	248	38	153	31	324	29	75	13	43	46	68
1:126570393-126571712|72.82|MACS_peak_179	48	288	39	182	42	358	32	85	15	61	49	81
1:126573344-126575349|128.60|MACS_peak_1336	184	612	176	472	172	610	184	458	97	208	258	230
1:126576568-126577390|128.84|MACS_peak_1337	35	125	33	136	20	168	21	55	26	50	16	45
1:126578431-126578871|68.12|MACS_peak_184	34	27	11	28	32	21	41	82	15	20	37	36
1:126597167-126597931|143.98|MACS_peak_1338	30	92	35	144	32	213	20	33	29	55	59	41
1:126607293-126607959|88.38|MACS_peak_1339	49	88	23	64	24	120	24	45	29	61	29	27
1:126660206-126660996|120.67|MACS_peak_1340	36	51	53	147	49	155	32	71	38	59	31	48
1:126810949-126811695|139.00|MACS_peak_1341	11	76	22	70	18	128	13	25	13	26	20	24
1:126918281-126918990|82.87|MACS_peak_1342	15	37	18	47	25	146	9	19	11	30	28	37
1:126925157-126925718|103.91|MACS_peak_1343	7	15	22	51	21	108	15	26	13	23	21	20
1:126999627-127000459|56.38|MACS_peak_180	32	149	21	64	15	120	18	49	17	24	21	25
1:126999734-127000390|80.18|MACS_peak_1344	30	136	15	55	11	112	17	47	14	23	19	20
1:127001144-127002074|130.86|MACS_peak_1345	17	151	23	165	21	225	61	33	32	28	56	50
1:127001439-127002091|79.48|MACS_peak_181	12	140	14	132	14	176	55	29	23	25	48	31
1:127014066-127016279|152.60|MACS_peak_1346	285	594	138	497	210	899	287	571	147	179	296	228
1:127105890-127106207|53.52|MACS_peak_185	29	9	24	24	21	17	29	48	24	17	48	35
1:127140292-127140989|98.33|MACS_peak_1347	10	51	19	82	8	139	16	26	19	19	28	28
1:127212604-127213513|337.04|MACS_peak_1348	44	50	52	122	41	293	20	26	26	53	34	54
1:127267475-127268716|123.07|MACS_peak_1349	111	360	93	344	192	580	80	154	82	117	183	176
1:127292982-127293763|76.24|MACS_peak_1350	49	106	44	141	34	185	56	83	29	71	50	56
1:127348275-127349066|63.51|MACS_peak_1351	30	98	40	155	57	174	47	93	56	75	74	56
1:127352647-127353884|53.58|MACS_peak_182	54	246	42	221	29	311	39	101	27	47	46	69
1:127352682-127353933|268.55|MACS_peak_1352	54	243	44	211	30	306	38	99	28	46	45	67
1:127354054-127354929|146.06|MACS_peak_1353	32	105	39	166	32	189	18	47	12	44	24	51
1:127354177-127354793|52.65|MACS_peak_183	24	95	31	135	24	166	14	35	9	37	24	35
1:127372780-127374481|72.20|MACS_peak_151	751	1444	874	1373	947	1276	678	1518	427	832	983	724
1:127379790-127381435|154.01|MACS_peak_1354	212	374	243	403	224	483	155	254	131	252	217	213
1:127382632-127384021|336.40|MACS_peak_1355	52	258	76	502	92	627	26	113	42	120	88	120
1:127382746-127383966|78.78|MACS_peak_70	45	243	71	485	90	611	24	105	41	112	83	110
1:127396572-127397412|155.84|MACS_peak_1356	37	78	45	124	49	183	11	19	26	35	46	63
1:127400765-127401077|58.10|MACS_peak_186	10	21	14	25	23	42	16	52	15	22	21	20
1:127442941-127443362|62.28|MACS_peak_38	24	20	14	52	8	21	25	23	12	25	68	38
1:127463769-127464678|196.35|MACS_peak_1357	31	44	37	259	32	301	107	109	60	95	69	46
1:127496589-127497525|62.28|MACS_peak_1358	185	216	161	296	202	256	121	181	130	120	144	123
1:127530872-127531920|96.78|MACS_peak_187	347	526	314	892	363	748	527	886	274	382	608	374
1:127555797-127556930|83.48|MACS_peak_188	160	283	239	500	195	324	262	475	154	281	333	226
1:127576715-127577643|74.57|MACS_peak_189	419	599	493	1071	611	485	582	911	331	627	842	494
1:127625887-127626452|58.36|MACS_peak_1359	35	57	35	83	35	83	28	19	19	34	19	30
1:127660825-127662092|71.07|MACS_peak_1360	241	258	299	396	312	357	138	225	99	206	205	165
1:127863508-127864222|90.23|MACS_peak_1361	29	83	37	154	26	127	36	59	50	71	34	40
1:127868367-127869335|63.84|MACS_peak_152	543	1073	658	998	572	1034	632	862	390	502	934	343
1:127980945-127981720|88.32|MACS_peak_39	136	52	41	66	52	31	69	167	32	70	105	85
1:127980963-127981753|56.57|MACS_peak_190	153	51	41	67	52	35	73	169	31	69	104	89
1:128102289-128104164|55.84|MACS_peak_153	4801	6482	6112	7332	6698	6081	5309	7639	3508	6134	7550	4066
1:128134587-128135198|80.54|MACS_peak_1362	24	20	10	68	6	111	2	6	4	12	9	17
1:128136087-128136802|78.53|MACS_peak_1363	18	77	24	113	18	178	28	27	20	25	45	43
1:128243662-128245176|53.58|MACS_peak_154	1648	2729	1975	2929	2161	2613	1574	2530	1193	2062	2597	1229
[truncated: 43,044 more rows]
